# Supplementary material for: Impact of reducing meat and dairy consumption on nutrient intake, health, cost of diets and the environment: A simulation among adults in Scotland
Source: Research Square preprint supplement (doi:10.21203/rs.3.rs-5820769/v1), 2025-02-04
Supplement: Supplementary file 1 [file 045873995a1edc3241f3c21c.xlsx]

## Sheet: Beefg
Mixed Dish	Matching meat only item
Chilli con carne	Minced beef, stewed
Spaghetti bolognese, home made (pasta and sauce)	Minced beef, stewed
Greggs steak bake	Stewing steak/beef steak/braising steak, stewed
Scotch broth (soup), canned	Beef/frying steak
Steak pie, individual (including steak and kidney)	Stewing steak/beef steak/braising steak, stewed
Meat pizza (e.g. Hawaiian, pepperoni, meat feast)	Minced beef, stewed
Cup a soup, made up	Beef/frying steak
Beef stew with gravy and vegetables	Stewing steak/beef steak/braising steak, stewed
Cornish Pasty	Stewing steak/beef steak/braising steak, stewed
Mixed pizza (e.g. chicken and bacon)	Minced beef, stewed
Meat pizza (e.g. Hawaiian, pepperoni, meat feast), takeaway/restaurant	Minced beef, stewed
Minced beef, stewed, with onion	Minced beef, stewed
Spaghetti bolognese, ready meal	Minced beef, stewed
Minced lamb, stewed, with vegetables and gravy	Stewing steak/beef steak/braising steak, stewed
Cottage pie (beef), home made	Minced beef, stewed
Beef potato and vegetable stew	Stewing steak/beef steak/braising steak, stewed
Scotch pie (Bridie)	Minced beef, stewed
Filled pasta, meat (e.g chicken & chorizo tortelloni)	Beef/frying steak
Beef stroganoff	Beef sirloin steak, grilled
Meat pizza (e.g. Hawaiian, pepperoni, meat feast), stuffed crust, takeaway/restaurant	Minced beef, stewed
Beef lasagne	Minced beef, stewed
Beef bolognese sauce, made with bottled pasta sauce	Minced beef, stewed
Steak pie, slice from a large pie (including steak and kidney)	Stewing steak/beef steak/braising steak, stewed
Beef chow mein, stir fry (with noodles)	Beef/frying steak
Beef curry, takeaway	Stewing steak/beef steak/braising steak, stewed
Corned beef sandwich with white/malted bread	Roast beef slices, pre-packed/deli
Beef stew/hotpot/hot pot, toddler meal (e.g. Heinz, Ella's kitchen)	Stewing steak/beef steak/braising steak, stewed
Meatballs in tomato sauce	Minced beef, stewed
Bovril	Beef/frying steak
Beef lasagne, ready meal, reduced fat (e.g. Weight watchers)	Minced beef, stewed
Pork/pork and beef meatballs, grilled	Minced beef, stewed
Minced beef pie (including beef and potato)	Minced beef, stewed
Beef bolognese sauce, home made	Minced beef, stewed
Beef lasagne, ready meal	Minced beef, stewed
Meatloaf	Minced beef, stewed
Beef stir fry (meat and vegetables)	Beef/frying steak
Minced beef, fried	Minced beef, stewed
Meat risotto (e.g. beef/ham)	Minced beef, stewed
Chicken/turkey bolognese sauce, homemade	Minced beef, stewed
Beef biryani	Stewing steak/beef steak/braising steak, stewed
Chilli con carne, ready meal, with rice	Minced beef, stewed
Beef bourguignon	Stewing steak/beef steak/braising steak, stewed
Beef sandwich with white/malted bread	Roast beef slices, pre-packed/deli
Beef casserole	Stewing steak/beef steak/braising steak, stewed
Reduced-fat cottage pie (beef), ready meal (e.g. Weight Watchers)	Minced beef, stewed
Beef and vegetable soup	Stewing steak/beef steak/braising steak, stewed
Corned beef sandwich with wholemeal/oatmeal bread	Roast beef slices, pre-packed/deli
Minced beef, stewed, with vegetables and gravy	Minced beef, stewed
Beef curry, in a tomato-based sauce, homemade	Stewing steak/beef steak/braising steak, stewed
Minced beef in gravy	Minced beef, stewed
Beef & vegetable hot pot/hotpot	Stewing steak/beef steak/braising steak, stewed
Cottage pie (beef), ready meal	Minced beef, stewed
Spring roll with meat and vegetables	Minced beef, stewed
Beef tikka masala, curry	Stewing steak/beef steak/braising steak, stewed
Meatballs fried	Minced beef, stewed
Spaghetti/pasta bolognese, toddler meal (e.g. Heinz, Cow & Gate)	Minced beef, stewed
Corned beef pasty/pie	Minced beef, stewed
Veal in a white/cream sauce	Veal mince, stewed
Beef stew and dumplings	Stewing steak/beef steak/braising steak, stewed
Spaghetti bolognese, ready meal, reduced fat (e.g. Weight Watchers)	Minced beef, stewed
Beef bolognese sauce, shop-bought	Minced beef, stewed
Beef hot pot/hotpot	Stewing steak/beef steak/braising steak, stewed
Mixed pizza (e.g. chicken and bacon), stuffed crust	Minced beef, stewed
Beef curry, ready meal, with rice	Stewing steak/beef steak/braising steak, stewed
Ravioli (filled pasta) in tomato sauce, canned	Minced beef, stewed
Stuffed pepper with meat and rice	Minced beef, stewed
Sausage with vegetable mash, ready meal, reduced fat (e.g. Weight Watchers)	Minced beef, stewed
Beef sandwich with wholemeal/oatmeal bread	Roast beef slices, pre-packed/deli
Beef curry, made with ready made sauce	Stewing steak/beef steak/braising steak, stewed
Steak and kidney pudding	Stewing steak/beef steak/braising steak, stewed
Stuffed marrow	Minced beef, stewed
Beef enchilada	Minced beef, stewed
Beef bhuna, curry	Stewing steak/beef steak/braising steak, stewed
Steak and ale pie, canned	Stewing steak/beef steak/braising steak, stewed
Cornish pasty (including beef and vegetable)	Stewing steak/beef steak/braising steak, stewed
Vegetable ravioli (filled pasta) in tomato sauce, canned	Beef/frying steak
Oxtail soup, canned	Oxtail
Beef balti, curry	Stewing steak/beef steak/braising steak, stewed
Meat pizza (e.g. Hawaiian, pepperoni, meat feast), stuffed crust	Minced beef, stewed

## Sheet: Lambg
Mixed Dish	Matching meat only item
Scotch broth (soup), canned	Stewing lamb, stewed
Doner kebab, meat, pitta and salad	Minced lamb, stewed
Lamb biryani	Minced lamb, stewed
Lamb bhuna, curry	Minced lamb, stewed
Lamb curry, homemade	Minced lamb, stewed
Shepherd's pie (lamb), home made	Minced lamb, stewed
Lancashire/Lamb hot pot/hotpot	Stewing lamb, stewed
Lamb jalfrezi, curry	Minced lamb, stewed
Mousakka, home made	Minced lamb, stewed
Moussaka (made with beef)	Minced lamb, stewed
Lamb kebab with minced lamb and herbs	Minced lamb, stewed
Beef kebab	Minced lamb, stewed
Lamb curry, take away	Minced lamb, stewed
Irish stew	Stewing lamb, stewed
Mixed meat kebabs	Minced lamb, stewed
Lamb tikka masala, curry	Minced lamb, stewed
Mousakka, ready meal	Minced lamb, stewed
Shish/kofte kebab	Minced lamb, stewed
Meat samosas	Minced lamb, stewed
Lamb korma, curry	Minced lamb, stewed
Shepherd's pie (lamb), ready meal	Minced lamb, stewed
Doner kebab (meat and pitta only)	Minced lamb, stewed
Pork kebabs	Minced lamb, stewed
Stuffed pepper with meat and rice	Minced lamb, stewed
Lamb pasanda, curry	Minced lamb, stewed
Lamb rogan josh, curry	Minced lamb, stewed
Kheema naan	Minced lamb, stewed

## Sheet: Porkg
Mixed Dish	Matching meat only item
Pork pie	Minced pork, stewed
Pork casserole	Diced pork
Meatballs in tomato sauce	Minced pork, stewed
Pork/pork and beef meatballs, grilled	Minced pork, stewed
Pork spare ribs in Barbeque sauce	Roast/grilled pork spare rib (fat eaten)
Luncheon meat, not canned	Ham hock
Meatloaf	Minced pork, stewed
Pork burgers (no bun)	Minced pork, stewed
Pork chop, fried	Pork chop, grilled, fat eaten
Chinese dumpling	Minced pork, stewed
Sweet and sour pork	Diced pork
Pork pie, slice from large pie	Pork fillet (tenderloin)
Luncheon meat/chopped pork, canned (e.g. spam)	Ham hock
Pork escalope	Pork fillet (tenderloin)
Meatballs fried	Minced pork, stewed
Pork stir fry (meat and vegetables)	Diced pork
Meatballs, canned in sauce	Minced pork, stewed
Haslet	Ham hock
Pork Chow mein, stir fry (with noodles)	Diced pork
Stuffed pepper with meat and rice	Minced pork, stewed
Bacon burger (no bun)	Minced pork, stewed
Pate, reduced fat	Pork fillet (tenderloin)
Chinese meat bun	Minced pork, stewed
Roast pork dinner, ready meal	Roast pork (fat not eaten)

## Sheet: Poultryg
Mixed Dish	Matching meat only item
Chicken tikka masala, curry	Chicken tikka, grilled
Chicken slice with stuffing	Roast chicken (skin not eaten)
Chicken casserole/stew	Roast chicken (skin not eaten)
Special fried rice	Roast/grilled chicken breast (skin not eaten)
Sweet and sour chicken	Roast/grilled chicken breast (skin not eaten)
Chicken mayo sandwich with white/malted bread	Roast chicken (skin not eaten)
Chicken korma, curry	Chicken tikka, grilled
Chicken breast, fried	Roast/grilled chicken breast (skin not eaten)
Chicken fried rice, including takeaway	Roast/grilled chicken breast (skin not eaten)
Chicken goujon/nugget/dipper, in breadcrumb or batter	Roast/grilled chicken drumstick/wing (skin not eaten)
Chicken fajita (including tortilla)	Roast/grilled chicken breast (skin not eaten)
Turkey breast, fried	Roast/grilled turkey breast
Chicken salad sandwich with white/malted bread	Roast chicken (skin not eaten)
Cup a soup, made up	Roast/grilled chicken breast (skin not eaten)
Chicken pizza, stuffed crust	Roast/grilled chicken breast (skin not eaten)
Chicken burger, in a bun, with lettuce and mayo	Roast/grilled chicken breast (skin not eaten)
Chicken jalfrezi, curry	Chicken tikka, grilled
Pasta with meat in a tomato-based sauce e.g. chicken	Roast/grilled chicken breast (skin not eaten)
Chicken balti, curry	Chicken tikka, grilled
Cream of chicken soup, canned	Roast/grilled chicken breast (skin not eaten)
Mixed pizza (e.g. chicken and bacon)	Roast/grilled chicken breast (skin not eaten)
Chicken portion, coated in batter, deep fried, with bone (e.g. KFC)	Roast/grilled chicken drumstick/wing (skin eaten)
Chicken curry made with ready made sauce	Chicken tikka, grilled
Chicken pizza	Roast/grilled chicken breast (skin not eaten)
Chicken noodle soup	Roast/grilled chicken breast (skin not eaten)
Chicken and vegetable soup, homemade	Roast/grilled chicken breast (skin not eaten)
Chicken pasta bake	Roast/grilled chicken breast (skin not eaten)
Cream of chicken soup	Roast/grilled chicken breast (skin not eaten)
Chicken and vegetable soup, shop-bought	Roast/grilled chicken breast (skin not eaten)
Chicken portion, fried	Roast/grilled chicken drumstick/wing (skin not eaten)
Chicken kiev	Roast/grilled chicken breast (skin not eaten)
Chicken burger, coated, grilled (no bun)	Roast/grilled chicken breast (skin not eaten)
Chicken curry home made	Chicken tikka, grilled
Chicken and bacon sub roll/baguette	Roast chicken (skin not eaten)
Chicken pie, canned (with or without vegetables)	Roast chicken (skin not eaten)
Chicken and bacon sandwich with white/malted bread	Roast chicken (skin not eaten)
Southern fried chicken sub roll/baguette	Tandoori chicken
Chicken fajita (filling only)	Tandoori chicken
Chicken stir fry (meat and vegetables with sauce)	Roast/grilled chicken breast (skin not eaten)
Chicken biryani	Chicken tikka, grilled
Chicken skewer	Roast/grilled chicken drumstick/wing (skin not eaten)
Chicken pakora	Tandoori chicken
Meat sandwich paste (e.g. chicken, beef)	Roast chicken (skin not eaten)
KFC chicken wraps (e.g. Zinger Twister)	Roast/grilled chicken drumstick/wing (skin eaten)
Ready cooked savoury rice (e.g. Uncle Bens)	Minced turkey, stewed
Coated chicken breast fillet, grilled	Roast/grilled chicken breast (skin not eaten)
Chicken pie, slice from a large	Roast chicken (skin not eaten)
Chicken sandwich with wholemeal/oatmeal bread	Roast chicken (skin not eaten)
Chicken pie, individual (including bacon and vegetable varieties)	Roast chicken (skin not eaten)
Chicken stir fry (meat and vegetables)	Roast/grilled chicken breast (skin not eaten)
Chicken breast, marinated, homemade	Roast/grilled chicken breast (skin not eaten)
Chicken/turkey kebab	Tandoori chicken
Chicken breast, marinated, shop-bought	Roast/grilled chicken breast (skin not eaten)
Butter chicken, curry	Chicken tikka, grilled
Chicken enchilada	Tandoori chicken
Chicken legs/wings marinated	Roast/grilled chicken drumstick/wing (skin not eaten)
Turkey slice, smoked or unsmoked (pre-packed/deli)	Turkey breast, slices (pre-packed/deli)
Chicken rogan josh, curry	Chicken tikka, grilled
Chicken in a black bean sauce	Roast/grilled chicken breast (skin not eaten)
Chicken in a white wine/cream sauce, homemade	Roast/grilled chicken breast (skin not eaten)
Chicken slice, smoked or unsmoked (pre-packed/deli)	Roast/grilled chicken breast (skin not eaten)
Chicken and bacon sandwich with mayo with wholemeal/oatmeal bread	Roast chicken (skin not eaten)
McDonald's McChicken sandwich	Roast/grilled chicken breast (skin not eaten)
Chicken and vegetable pie (topped with mashed potato)	Roast chicken (skin not eaten)
Coated chicken breast fillet, fried	Roast/grilled chicken breast (skin eaten)
Chicken curry, ready meal, with rice (e.g balti, tikka masala)	Chicken tikka, grilled
Mixed pizza (e.g. chicken and bacon), takeaway/restaurant	Roast chicken (skin eaten)
Chicken satay	Tandoori chicken
Chicken with a tomato based sauce	Roast chicken (skin not eaten)
Chicken mayonnaise sandwich fillers (e.g. chicken and sweetcorn, tikka, coronation)	Chicken tikka, grilled
McDonald's Chicken Selects	Roast/grilled chicken breast (skin not eaten)
Chicken curry, takeaway	Chicken tikka, grilled
Turkey burger/Escalope, fried (no bun)	Roast/grilled turkey breast
Chicken chow mein, stir fry (with noodles)	Roast chicken (skin eaten)
Chicken breast, fried in vegetable based oil	Roast/grilled chicken breast (skin eaten)
Coated chicken pieces, fried	Roast/grilled chicken drumstick/wing (skin eaten)
Chicken salad sandwich with mayo with white/malted bread	Roast chicken (skin not eaten)
Chicken salad sandwich with wholemeal/oatmeal bread	Roast chicken (skin not eaten)
Chicken in a tomato/BBQ sauce with potato wedges, ready meal, reduced fat	Roast chicken (skin not eaten)
Chicken risotto	Roast chicken (skin not eaten)
Turkey burger/escalope, grilled (no bun),	Roast/grilled turkey breast
Lemon chicken	Roast chicken (skin not eaten)
Turkey goujon/nugget/dipper, in breadcrumb or batter	Turkey breast, slices (pre-packed/deli)
Chicken and bacon wrap	Roast chicken (skin eaten)
Chicken bhuna, curry	Chicken tikka, grilled
Chicken pizza, takeaway/restaurant	Roast chicken (skin eaten)
Chicken and prawn paella, ready meal, reduced fat	Roast chicken (skin not eaten)
Thai green chicken curry	Chicken tikka, grilled
Sweet and sour chicken, ready meal, with rice	Roast chicken (skin not eaten)
Battered chicken balls (with or without sauce)	Roast/grilled chicken drumstick/wing (skin eaten)
Dairylea Lunchables (includes cheese, meat and crackers)	Roast chicken (skin not eaten)
Chicken and pasta ready meal	Roast chicken (skin not eaten)
Chicken salad sub roll/baguette	Roast chicken (skin not eaten)
Popcorn chicken (e.g. KFC)	Roast/grilled chicken drumstick/wing (skin eaten)
Mixed meat/seafood paella	Roast/grilled chicken thigh (skin not eaten)
BBQ Southern fried chicken wrap	Roast/grilled chicken thigh (skin eaten)
Meat feast sub roll/baguette	Roast/grilled chicken thigh (skin not eaten)
Sweet and sour chicken with a ready made sauce	Roast/grilled chicken breast (skin not eaten)
Sweet and sour chicken, ready meal, with rice, reduced fat	Roast/grilled chicken breast (skin not eaten)
Chicken and bacon sandwich with wholemeal/oatmeal bread	Roast/grilled chicken breast (skin not eaten)
Chicken salad sandwich with mayo with wholemeal/oatmeal bread	Roast/grilled chicken breast (skin not eaten)
Chicken sandwich with white/malted bread	Roast/grilled chicken breast (skin not eaten)
Meat samosas	Minced turkey, stewed
Chicken and sweetcorn soup	Roast/grilled chicken breast (skin not eaten)
Chicken breast, fried in olive oil	Roast/grilled chicken breast (skin not eaten)
Chicken and ham sandwich with mayo with white/malted bread	Roast/grilled chicken breast (skin not eaten)
Chicken burrito	Roast/grilled chicken thigh (skin not eaten)
McDonald's Caesar salad	Roast/grilled chicken breast (skin not eaten)
Greggs chicken bake	Roast/grilled chicken breast (skin not eaten)
Chicken korma, curry, ready meal, with rice	Chicken tikka, grilled
Mixed pizza (e.g. chicken and bacon), stuffed crust	Roast/grilled chicken thigh (skin not eaten)
Chicken stir fry with nut (e.g. cashew/peanuts)	Roast/grilled chicken breast (skin not eaten)
Chicken/turkey roast dinner, ready meal	Roast chicken (skin not eaten)
Turkey stir fry (including vegetables, no noodles/rice)	Roast/grilled turkey breast
Chicken dhansak, curry	Chicken tikka, grilled
Chicken curry, ready meal, with rice, reduced fat	Tandoori chicken
Chicken and ham sandwich with mayo with wholemeal/oatmeal bread	Roast/grilled chicken breast (skin not eaten)
Chicken casserole, canned	Roast chicken (skin not eaten)
Chicken in a white wine/cream sauce, shop-bought	Roast/grilled chicken breast (skin not eaten)
Chicken burger/turkey burger, fried (no bun)	Roast/grilled chicken thigh (skin not eaten)
Chicken pasty/slice	Roast/grilled chicken breast (skin not eaten)
Chicken with a tomato and cheese sauce	Roast/grilled chicken thigh (skin not eaten)
Game pie (e.g. venison, rabbit, pheasant)	Roast turkey (skin not eaten)
Coated chicken pieces, from takeaway.	Roast/grilled chicken drumstick/wing (skin eaten)
Chicken mayonnaise sandwich fillers, low fat	Roast/grilled chicken breast (skin not eaten)
Chicken and vegetables with a tomato based sauce	Roast chicken (skin not eaten)
Chicken and vegetable pie, slice from a large	Roast/grilled chicken leg (skin not eaten)
KFC tower burger	Roast/grilled chicken breast (skin eaten)
Chicken kiev, reduced fat	Roast/grilled chicken breast (skin not eaten)

## Sheet: OtherRedMeatg
Mixed Dish	Matching meat only item
Meat risotto (e.g. beef/ham)	Venison, roasted or stewed
Game pie (e.g. venison, rabbit, pheasant)	Venison, roasted or stewed

## Sheet: ProcessedPoultryg
Mixed Dish	Matching meat only item
Spicy/sweet chilli chicken wrap	Roast/grilled chicken breast (skin not eaten)
Chicken mayo sandwich with wholemeal/oatmeal bread	Roast/grilled chicken breast (skin not eaten)
Mixed pizza (e.g. chicken and bacon), stuffed crust, takeaway/restaurant	Roast/grilled chicken thigh (skin not eaten)

## Sheet: Burgersg
Mixed Dish	Matching meat only item
Hot dog/frankfurter with sauce and onions in a bun	Hot dog/frankfurter
McDonalds Cheeseburger	Beef burger, grilled (no bun)
Beef burger/hamburger, in a bun, not quarter pounder	Beef burger, grilled (no bun)
Burger King bacon cheeseburger	Beef burger, grilled (no bun)
Cheese burger, in a bun, quarter pounder	Beef burger, 100% beef, grilled (no bun)
Beef burger, reduced fat, grilled (no bun)	Beef burger, grilled (no bun)
Mcdonalds bacon cheese burger	Beef burger, grilled (no bun)
McDonald's Big Mac	Beef burger, grilled (no bun)
Bacon cheese burger, in a bun	Beef burger, grilled (no bun)
Burger King Whooper, no cheese	Beef burger, 100% beef, grilled (no bun)
Cheese burger, in a bun, not quarter pounder	Beef burger, grilled (no bun)
Beef burger, fried (no bun)	Beef burger, grilled (no bun)
Cheeseburger, in a bun, quarter pounder	Beef burger, 100% beef, grilled (no bun)
Burger King Double Whooper with cheese	Beef burger, 100% beef, grilled (no bun)
Burger King Whopper with cheese	Beef burger, 100% beef, grilled (no bun)
Bacon cheeseburger, including bun	Beef burger, grilled (no bun)
Rustlers burger	Beef burger, grilled (no bun)

## Sheet: Sausagesg
Mixed Dish	Matching meat only item
Pigs in blankets	Pork sausage, grilled
Sausage and egg in a bun/muffin (e.g. Bacon and egg McMuffin)	Pork sausage, grilled
Sausage sandwich with ketchup with white/malted bread or roll	Pork sausage, grilled
Meat pizza (e.g. Hawaiian, pepperoni, meat feast), takeaway/restaurant	Chorizo
Toad in the hole	Pork sausage, grilled
Sausage roll	Pork sausage, grilled
Hot dog/frankfurter with sauce in a bun	Hot dog/frankfurter
Meat pizza (e.g. Hawaiian, pepperoni, meat feast), stuffed crust, takeaway/restaurant	Chorizo
Baked beans and sausages	Pork sausage, grilled
Sausage casserole	Pork sausage, grilled
Spaghetti bolognese, canned	Sausage, fried
Pasta with meat and tomato-based sauce, canned (e.g. pasta with sausages)	Pork sausage, grilled
Chicken and prawn paella, ready meal, reduced fat	Chorizo
Breakfast sub roll/baguette	Pork sausage, grilled
Sausage meat stuffing	Pork sausage, grilled
Mixed meat/seafood paella	Chorizo
Sausage sandwich with ketchup with wholemeal/oatmeal bread or roll	Pork sausage, grilled
Breakfast sandwich with wholemeal/oatmeal bread	Pork sausage, grilled
Sausage in batter, fried	Sausage, fried
Breakfast sandwich with white/malted bread	Pork sausage, grilled
Sausage and egg in a bun/muffin (e.g. Sausage and egg McMuffin)	Pork sausage, grilled

## Sheet: ProcessedRedMeatg
Mixed Dish	Matching meat only item
Pigs in blankets	Bacon, streaky, smoked, grilled
Ham sandwich with wholemeal/oatmeal bread	Ham, not smoked
Sausage sandwich with ketchup with white/malted bread or roll	Pork sausage, grilled
Meat pizza (e.g. Hawaiian, pepperoni, meat feast)	Salami
Ham sandwich with white/malted bread	Ham, not smoked
Mixed pizza (e.g. chicken and bacon)	Bacon, back/middle, unsmoked, grilled (including fat)
Meat pizza (e.g. Hawaiian, pepperoni, meat feast), takeaway/restaurant	Salami
Bacon, unsmoked, fried (fat removed)	Bacon, unsmoked, fried (fat removed)
Meat based quiche (e.g. quiche lorraine), reduced fat	Ham, not smoked
Omelette with ham & cheese	Ham, not smoked
Pea and ham soup	Ham, not smoked
Bacon sandwich with white/malted bread	Bacon, back/middle, unsmoked, grilled (including fat)
Cheese and ham sandwich with wholemeal/oatmeal bread	Ham, not smoked
Corned beef hash	Corned beef, canned
Ham salad sub roll/baguette	Ham, not smoked
Chicken and bacon sub roll/baguette	Bacon, back/middle, unsmoked, grilled (including fat)
Chicken and bacon sandwich with white/malted bread	Bacon, back/middle, unsmoked, grilled (including fat)
Meat pizza (e.g. Hawaiian, pepperoni, meat feast), stuffed crust, takeaway/restaurant	Salami
Bacon sandwich with wholemeal/oatmeal bread	Bacon, back/middle, unsmoked, grilled (including fat)
Beef lasagne	Minced beef, stewed
Ham and egg sub roll/baguette	Ham, not smoked
Carbonara pasta sauce	Bacon, back/middle, unsmoked, grilled (including fat)
Burger King bacon cheeseburger	Bacon, back/middle, unsmoked, grilled (including fat)
Ready cooked savoury rice (e.g. Uncle Bens)	Ham, not smoked
Bacon sandwich with mayo wholemeal/oatmeal bread	Bacon, back/middle, unsmoked, grilled (including fat)
Meat based quiche (e.g. quiche lorraine)	Ham, not smoked
Ham salad sandwich with wholemeal/oatmeal bread	Ham, not smoked
BLT sandwich with wholemeal/oatmeal bread	Bacon, back/middle, unsmoked, grilled (including fat)
Bacon and cheese grills	Bacon, back/middle, unsmoked, grilled (including fat)
Meat savoury pastry (e.g. ham and cheese)	Ham, not smoked
Ham and cheese sub roll/baguette	Ham, not smoked
Cheese and ham sandwich with white/malted bread	Ham, not smoked
Bacon and egg in a bun/muffin (e.g. bacon and egg McMuffin)	Bacon, back/middle, unsmoked, grilled (including fat)
Ham sandwich with mayo with white/malted bread	Ham, not smoked
Chicken and bacon sandwich with mayo with wholemeal/oatmeal bread	Bacon, back/middle, unsmoked, grilled (including fat)
Pasta carbonara (e.g. spaghetti)	Bacon, back/middle, unsmoked, grilled (including fat)
Luncheon meat, not canned	Ham, not smoked
Scotch egg (including mini/picnic size)	Ham, not smoked
Mixed pizza (e.g. chicken and bacon), takeaway/restaurant	Bacon, back/middle, unsmoked, grilled (including fat)
Chicken mayonnaise sandwich fillers (e.g. chicken and sweetcorn, tikka, coronation)	Ham, not smoked
Pasta carbonara (e.g. spaghetti), ready meal	Bacon, back/middle, unsmoked, grilled (including fat)
Beef bourguignon	Stewing steak/beef steak/braising steak, stewed
Mcdonalds bacon cheese burger	Bacon, back/middle, unsmoked, grilled (including fat)
Ham and cheese slice/pie (with or without vegetable)	Ham, not smoked
Ham salad sandwich with white/malted bread	Ham, not smoked
Ham sandwich with mayo with wholemeal/oatmeal bread	Ham, not smoked
Chicken and bacon wrap	Bacon, back/middle, unsmoked, grilled (including fat)
Pate sandwich with wholemeal/oatmeal bread	Pate (e.g. brussels liver pate / duck and orange pate)
Bacon, smoked, fried (fat removed)	Bacon, back/middle, smoked, grilled (including fat)
Pate sandwich with white/malted bread	Pate (e.g. brussels liver pate / duck and orange pate)
Bacon cheese burger, in a bun	Bacon, back/middle, unsmoked, grilled (including fat)
Breakfast sub roll/baguette	Bacon, back/middle, unsmoked, grilled (including fat)
Ham salad sandwich with mayo with wholemeal/oatmeal bread	Ham, not smoked
Dairylea Lunchables (includes cheese, meat and crackers)	Luncheon meat, not canned
Luncheon meat/chopped pork, canned (e.g. spam)	Luncheon meat, not canned
Mixed pizza (e.g. chicken and bacon), stuffed crust, takeaway/restaurant	Bacon, back/middle, unsmoked, grilled (including fat)
Meat feast sub roll/baguette	Ham, not smoked
Sausage sandwich with ketchup with wholemeal/oatmeal bread or roll	Sausages, pork, grilled
Chicken and bacon sandwich with wholemeal/oatmeal bread	Bacon, back/middle, unsmoked, grilled (including fat)
Breakfast sandwich with wholemeal/oatmeal bread	Bacon, back/middle, unsmoked, grilled (including fat)
BLT sandwich with white/malted bread	Bacon, back/middle, unsmoked, grilled (including fat)
Omelette with meat (e.g. ham)	Ham, not smoked
Chicken and ham sandwich with mayo with white/malted bread	Ham, not smoked
Mixed pizza (e.g. chicken and bacon), stuffed crust	Bacon, back/middle, unsmoked, grilled (including fat)
Omelette with fish/seafood (e.g. prawn)	Ham, not smoked
Chicken and ham sandwich with mayo with wholemeal/oatmeal bread	Ham, not smoked
Ham salad sandwich with mayo with white/malted bread	Ham, not smoked
Pasta with meat and creamy sauce	Ham, not smoked
Breakfast sandwich with white/malted bread	Bacon, back/middle, unsmoked, grilled (including fat)
Chicken with a tomato and cheese sauce	Ham, not smoked
Loaded potato skins (e.g with cheese & bacon)	Bacon, back/middle, unsmoked, grilled (including fat)
Bacon cheeseburger, including bun	Bacon, back/middle, unsmoked, grilled (including fat)
Chicken mayonnaise sandwich fillers, low fat	Ham, not smoked
Meat pizza (e.g. Hawaiian, pepperoni, meat feast), stuffed crust	Bacon, back/middle, unsmoked, grilled (including fat)

## Sheet: Gamebirdsg
Mixed Dish	Matching meat only item
Special fried rice	Roast duck (skin not eaten)
Duck with hoisin sauce wrap	Roast duck (skin not eaten)
Chinese crispy duck (including pancake and sauce)	Roast duck (skin eaten)
Game pie (e.g. venison, rabbit, pheasant)	Roast/stewed pheasant
