# Supplementary material for: Impact of reducing meat and dairy consumption on nutrient intake, health, cost of diets and the environment: A simulation among adults in Scotland
Source: Research Square preprint supplement (doi:10.21203/rs.3.rs-5820769/v1), 2025-02-04
Supplement: Supplementary file 2 [file 1468c7714efbe7c8d0e4ae13.xlsx]

## Sheet: Energy
	Change in Energy, kcal, (95% UI), 16-24	Change in Energy, kcal, (95% UI), 25-34	Change in Energy, kcal, (95% UI), 35-44	Change in Energy, kcal, (95% UI), 45-54	Change in Energy, kcal, (95% UI), 55-64	Change in Energy, kcal, (95% UI), 65-74	Change in Energy, kcal, (95% UI), 75+		Energy, kcal, (95% UI), 16-24	Energy, kcal, (95% UI), 25-34	Energy, kcal, (95% UI), 35-44	Energy, kcal, (95% UI), 45-54	Energy, kcal, (95% UI), 55-64	Energy, kcal, (95% UI), 65-74	Energy, kcal, (95% UI), 75+
Baseline									1624.53, (1466.82, 1782.24)	1613.84, (1544.18, 1683.5)	1788.02, (1722.84, 1853.2)	1625.98, (1555.3, 1696.66)	1622.54, (1565.49, 1679.59)	1546.53, (1496.67, 1596.39)	1548.23, (1484.15, 1612.31)
CCC 2030	-80.32, (-299.05, 138.41)	-77.43, (-174.24, 19.38)	-87.3, (-177.27, 2.67)	-78.97, (-176.89, 18.95)	-82.88, (-161.33, -4.43)	-81.34, (-150.23, -12.45)	-82.66, (-170.86, 5.54)		1544.21, (1392.65, 1695.77)	1536.41, (1469.18, 1603.64)	1700.72, (1638.7, 1762.74)	1547.01, (1479.25, 1614.77)	1539.66, (1485.82, 1593.5)	1465.2, (1417.66, 1512.74)	1465.57, (1404.97, 1526.17)
CCC 2050	-106.58, (-324.21, 111.05)	-102.04, (-198.64, -5.44)	-112.83, (-202.21, -23.45)	-101.01, (-198.46, -3.56)	-105.44, (-183.41, -27.47)	-100.89, (-169.52, -32.26)	-102.03, (-190.2, -13.86)		1517.95, (1367.99, 1667.91)	1511.8, (1444.88, 1578.72)	1675.2, (1614.04, 1736.36)	1524.97, (1457.89, 1592.05)	1517.1, (1463.95, 1570.25)	1445.64, (1398.48, 1492.8)	1446.19, (1385.62, 1506.76)
SDG	-77.56, (-294.59, 139.47)	-67.64, (-164.17, 28.89)	-85.83, (-175.45, 3.79)	-77.35, (-175.04, 20.34)	-83.71, (-161.44, -5.98)	-80.83, (-149.35, -12.31)	-74.92, (-163.13, 13.29)		1546.97, (1397.88, 1696.06)	1546.2, (1479.37, 1613.03)	1702.19, (1640.68, 1763.7)	1548.64, (1481.2, 1616.08)	1538.83, (1486.04, 1591.62)	1465.71, (1418.71, 1512.71)	1473.3, (1412.68, 1533.92)
Max red meat 60g/day	-84.87, (-301.28, 131.54)	-73.79, (-170.02, 22.44)	-93.28, (-182.72, -3.84)	-83.5, (-181.02, 14.02)	-89.97, (-167.49, -12.45)	-86.05, (-154.49, -17.61)	-80.94, (-169.21, 7.33)		1539.66, (1391.47, 1687.85)	1540.05, (1473.66, 1606.44)	1694.75, (1633.51, 1755.99)	1542.48, (1475.3, 1609.66)	1532.57, (1480.08, 1585.06)	1460.48, (1413.6, 1507.36)	1467.29, (1406.58, 1528.0)
Max red meat 31g/day	-113.85, (-329.35, 101.65)	-98.85, (-194.68, -3.02)	-124.18, (-212.96, -35.4)	-109.14, (-205.93, -12.35)	-115.77, (-192.83, -38.71)	-108.64, (-177.01, -40.27)	-106.28, (-194.92, -17.64)		1510.68, (1363.83, 1657.53)	1514.99, (1449.18, 1580.8)	1663.84, (1603.56, 1724.12)	1516.85, (1450.73, 1582.97)	1506.77, (1454.97, 1558.57)	1437.9, (1391.13, 1484.67)	1441.95, (1380.7, 1503.2)
CCC 2030, pulses & legumes	-38.7, (-259.27, 181.87)	-35.92, (-133.44, 61.6)	-41.32, (-132.5, 49.86)	-36.02, (-134.84, 62.8)	-38.65, (-117.8, 40.5)	-36.77, (-106.28, 32.74)	-36.96, (-126.38, 52.46)		1585.82, (1431.62, 1740.02)	1577.92, (1509.67, 1646.17)	1746.7, (1682.95, 1810.45)	1589.96, (1520.9, 1659.02)	1583.89, (1529.03, 1638.75)	1509.76, (1461.33, 1558.19)	1511.27, (1448.9, 1573.64)
CCC 2050, pulses & legumes	-47.22, (-267.28, 172.84)	-43.32, (-140.73, 54.09)	-49.57, (-140.54, 41.4)	-42.91, (-141.52, 55.7)	-46.07, (-125.01, 32.87)	-42.53, (-111.94, 26.88)	-42.71, (-132.14, 46.72)		1577.31, (1423.83, 1730.79)	1570.52, (1502.43, 1638.61)	1738.45, (1674.99, 1801.91)	1583.07, (1514.31, 1651.83)	1576.47, (1521.92, 1631.02)	1504.0, (1455.72, 1552.28)	1505.51, (1443.13, 1567.89)
SDG, pulses & legumes	-40.49, (-260.19, 179.21)	-34.61, (-131.97, 62.75)	-43.52, (-134.42, 47.38)	-37.81, (-136.47, 60.85)	-40.65, (-119.6, 38.3)	-38.28, (-107.58, 31.02)	-35.39, (-124.63, 53.85)		1584.04, (1431.08, 1737.0)	1579.23, (1511.21, 1647.25)	1744.51, (1681.15, 1807.87)	1588.17, (1519.33, 1657.01)	1581.89, (1527.32, 1636.46)	1508.25, (1460.12, 1556.38)	1512.84, (1450.73, 1574.95)
Max red meat 60g/day, pulses & legumes	-43.8, (-263.18, 175.58)	-37.06, (-134.24, 60.12)	-46.52, (-137.34, 44.3)	-40.12, (-138.7, 58.46)	-43.09, (-121.94, 35.76)	-40.12, (-109.37, 29.13)	-37.38, (-126.61, 51.85)		1580.72, (1428.23, 1733.21)	1576.78, (1509.02, 1644.54)	1741.5, (1678.26, 1804.74)	1585.86, (1517.14, 1654.58)	1579.45, (1525.02, 1633.88)	1506.41, (1458.36, 1554.46)	1510.85, (1448.75, 1572.95)
Max red meat 31g/day, pulses & legumes	-56.39, (-275.2, 162.42)	-46.79, (-143.71, 50.13)	-59.08, (-149.61, 31.45)	-49.9, (-148.15, 48.35)	-52.77, (-131.34, 25.8)	-47.83, (-116.99, 21.33)	-46.09, (-135.43, 43.25)		1568.14, (1416.48, 1719.8)	1567.05, (1499.66, 1634.44)	1728.94, (1666.12, 1791.76)	1576.08, (1507.83, 1644.33)	1569.77, (1515.74, 1623.8)	1498.7, (1450.77, 1546.63)	1502.14, (1439.88, 1564.4)
CCC 2030, vegetables	-56.95, (-276.84, 162.94)	-53.62, (-150.96, 43.72)	-59.09, (-149.82, 31.64)	-51.6, (-150.12, 46.92)	-54.21, (-133.05, 24.63)	-50.96, (-120.28, 18.36)	-50.97, (-140.29, 38.35)		1567.58, (1414.36, 1720.8)	1560.22, (1492.23, 1628.21)	1728.93, (1665.82, 1792.04)	1574.38, (1505.75, 1643.01)	1568.33, (1513.92, 1622.74)	1495.57, (1447.41, 1543.73)	1497.26, (1435.03, 1559.49)
CCC 2050, vegetables	-79.15, (-298.07, 139.77)	-74.29, (-171.43, 22.85)	-80.66, (-170.88, 9.56)	-70.17, (-168.28, 27.94)	-73.31, (-151.74, 5.12)	-67.36, (-136.46, 1.74)	-67.23, (-156.53, 22.07)		1545.38, (1393.56, 1697.2)	1539.55, (1471.85, 1607.25)	1707.36, (1644.98, 1769.74)	1555.81, (1487.78, 1623.84)	1549.23, (1495.42, 1603.04)	1479.18, (1431.34, 1527.02)	1481.0, (1418.8, 1543.2)
SDG, vegetables	-55.23, (-273.56, 163.1)	-45.76, (-142.83, 51.31)	-58.46, (-148.82, 31.9)	-50.75, (-149.04, 47.54)	-55.31, (-133.54, 22.92)	-50.91, (-119.88, 18.06)	-44.64, (-133.91, 44.63)		1569.3, (1418.32, 1720.28)	1568.08, (1500.47, 1635.69)	1729.56, (1666.97, 1792.15)	1575.23, (1506.93, 1643.53)	1567.23, (1513.7, 1620.76)	1495.62, (1447.97, 1543.27)	1503.58, (1441.42, 1565.74)
Max red meat 60g/day, vegetables	-61.62, (-279.41, 156.17)	-51.07, (-147.87, 45.73)	-64.89, (-155.09, 25.31)	-56.03, (-154.16, 42.1)	-60.69, (-138.74, 17.36)	-55.36, (-124.25, 13.53)	-49.74, (-139.06, 39.58)		1562.91, (1412.72, 1713.1)	1562.77, (1495.56, 1629.98)	1723.13, (1660.79, 1785.47)	1569.96, (1501.89, 1638.03)	1561.85, (1508.59, 1615.11)	1491.17, (1443.63, 1538.71)	1498.49, (1436.26, 1560.72)
Max red meat 31g/day, vegetables	-86.85, (-303.78, 130.08)	-72.62, (-169.04, 23.8)	-91.59, (-181.2, -1.98)	-78.04, (-175.52, 19.44)	-82.81, (-160.44, -5.18)	-74.55, (-143.37, -5.73)	-71.27, (-160.89, 18.35)		1537.68, (1388.73, 1686.63)	1541.22, (1474.56, 1607.88)	1696.43, (1634.94, 1757.92)	1547.95, (1480.82, 1615.08)	1539.73, (1487.09, 1592.37)	1471.99, (1424.56, 1519.42)	1476.95, (1414.29, 1539.61)
CCC 2030, egg	-30.39, (-251.28, 190.5)	-27.86, (-125.48, 69.76)	-33.23, (-124.62, 58.16)	-28.93, (-127.89, 70.03)	-31.56, (-110.85, 47.73)	-30.31, (-99.92, 39.3)	-30.58, (-120.05, 58.89)		1594.13, (1439.47, 1748.79)	1585.98, (1517.6, 1654.36)	1754.79, (1690.73, 1818.85)	1597.06, (1527.8, 1666.32)	1590.98, (1535.91, 1646.05)	1516.22, (1467.65, 1564.79)	1517.65, (1455.21, 1580.09)
CCC 2050, egg	-32.68, (-253.3, 187.94)	-29.22, (-126.79, 68.35)	-35.41, (-126.75, 55.93)	-30.49, (-129.34, 68.36)	-33.66, (-112.84, 45.52)	-31.22, (-100.79, 38.35)	-31.55, (-121.07, 57.97)		1591.85, (1437.58, 1746.12)	1584.62, (1516.31, 1652.93)	1752.61, (1688.62, 1816.6)	1595.49, (1526.38, 1664.6)	1588.88, (1533.97, 1643.79)	1515.31, (1466.8, 1563.82)	1516.68, (1454.17, 1579.19)
SDG, egg	-33.78, (-254.16, 186.6)	-29.53, (-127.07, 68.01)	-36.71, (-127.91, 54.49)	-31.91, (-130.78, 66.96)	-33.97, (-113.28, 45.34)	-32.53, (-102.03, 36.97)	-31.17, (-120.42, 58.08)		1590.75, (1436.82, 1744.68)	1584.32, (1516.05, 1652.59)	1751.31, (1687.53, 1815.09)	1594.07, (1524.94, 1663.2)	1588.57, (1533.48, 1643.66)	1514.01, (1465.6, 1562.42)	1517.06, (1454.93, 1579.19)
Max red meat 60g/day, egg	-35.69, (-255.86, 184.48)	-30.68, (-128.09, 66.73)	-38.16, (-129.32, 53.0)	-32.88, (-131.71, 65.95)	-35.07, (-114.33, 44.19)	-33.18, (-102.65, 36.29)	-31.75, (-120.98, 57.48)		1588.84, (1435.21, 1742.47)	1583.16, (1515.07, 1651.25)	1749.87, (1686.14, 1813.6)	1593.11, (1524.04, 1662.18)	1587.47, (1532.45, 1642.49)	1513.35, (1464.98, 1561.72)	1516.48, (1454.38, 1578.58)
Max red meat 31g/day, egg	-42.52, (-262.27, 177.23)	-35.02, (-132.25, 62.21)	-44.27, (-135.31, 46.77)	-37.09, (-135.76, 61.58)	-39.09, (-118.16, 39.98)	-35.67, (-105.07, 33.73)	-34.62, (-123.92, 54.68)		1582.01, (1428.99, 1735.03)	1578.82, (1510.98, 1646.66)	1743.75, (1680.19, 1807.31)	1588.9, (1520.05, 1657.75)	1583.45, (1528.7, 1638.2)	1510.87, (1462.59, 1559.15)	1513.61, (1451.42, 1575.8)
CCC 2030, non-smoked oily fish	-20.03, (-241.33, 201.27)	-17.81, (-115.55, 79.93)	-23.14, (-114.8, 68.52)	-20.08, (-119.22, 79.06)	-22.72, (-102.2, 56.76)	-22.25, (-91.98, 47.48)	-22.63, (-112.18, 66.92)		1604.49, (1449.25, 1759.73)	1596.03, (1527.47, 1664.59)	1764.88, (1700.43, 1829.33)	1605.9, (1536.38, 1675.42)	1599.82, (1544.49, 1655.15)	1524.28, (1475.53, 1573.03)	1525.6, (1463.05, 1588.15)
CCC 2050, non-smoked oily fish	-14.55, (-235.88, 206.78)	-11.63, (-109.42, 86.16)	-17.76, (-109.58, 74.06)	-15.01, (-114.18, 84.16)	-18.19, (-97.7, 61.32)	-17.12, (-86.91, 52.67)	-17.63, (-107.29, 72.03)		1609.98, (1454.69, 1765.27)	1602.21, (1533.57, 1670.85)	1770.27, (1705.6, 1834.94)	1610.97, (1541.41, 1680.53)	1604.35, (1548.97, 1659.73)	1529.41, (1480.58, 1578.24)	1530.6, (1467.89, 1593.31)
SDG, non-smoked oily fish	-25.41, (-246.68, 195.86)	-23.19, (-120.99, 74.61)	-28.22, (-119.83, 63.39)	-24.56, (-123.72, 74.6)	-25.64, (-105.44, 54.16)	-25.35, (-95.14, 44.44)	-25.91, (-115.2, 63.38)		1599.12, (1443.92, 1754.32)	1590.65, (1522.0, 1659.3)	1759.8, (1695.43, 1824.17)	1601.42, (1531.88, 1670.96)	1596.9, (1541.11, 1652.69)	1521.18, (1472.35, 1570.01)	1522.31, (1460.12, 1584.5)
Max red meat 60g/day, non-smoked oily fish	-25.57, (-246.78, 195.64)	-22.72, (-120.47, 75.03)	-27.73, (-119.37, 63.91)	-23.84, (-123.01, 75.33)	-25.07, (-104.88, 54.74)	-24.53, (-94.32, 45.26)	-24.73, (-114.0, 64.54)		1598.96, (1443.85, 1754.07)	1591.12, (1522.54, 1659.7)	1760.3, (1695.89, 1824.71)	1602.14, (1532.57, 1671.71)	1597.47, (1541.67, 1653.27)	1522.01, (1473.18, 1570.84)	1523.5, (1461.35, 1585.65)
Max red meat 31g/day, non-smoked oily fish	-25.22, (-246.22, 195.78)	-20.35, (-118.04, 77.34)	-25.8, (-117.55, 65.95)	-21.11, (-120.36, 78.14)	-22.03, (-101.79, 57.73)	-20.5, (-90.28, 49.28)	-20.32, (-109.63, 68.99)		1599.31, (1444.49, 1754.13)	1593.49, (1524.99, 1661.99)	1762.22, (1697.64, 1826.8)	1604.88, (1535.21, 1674.55)	1600.51, (1544.78, 1656.24)	1526.04, (1477.22, 1574.86)	1527.91, (1465.7, 1590.12)
CCC 2030, plant-based meat alternatives	-37.28, (-257.91, 183.35)	-34.54, (-132.08, 63.0)	-39.94, (-131.15, 51.27)	-34.8, (-133.64, 64.04)	-37.43, (-116.6, 41.74)	-35.66, (-105.19, 33.87)	-35.87, (-125.3, 53.56)		1587.25, (1432.97, 1741.53)	1579.3, (1511.03, 1647.57)	1748.09, (1684.28, 1811.9)	1591.18, (1522.09, 1660.27)	1585.11, (1530.22, 1640.0)	1510.87, (1462.41, 1559.33)	1512.36, (1449.98, 1574.74)
CCC 2050, plant-based meat alternatives	-44.72, (-264.88, 175.44)	-40.9, (-138.33, 56.53)	-47.14, (-138.17, 43.89)	-40.78, (-139.43, 57.87)	-43.94, (-122.92, 35.04)	-40.59, (-110.02, 28.84)	-40.8, (-130.24, 48.64)		1579.8, (1426.19, 1733.41)	1572.94, (1504.81, 1641.07)	1740.88, (1677.33, 1804.43)	1585.2, (1516.38, 1654.02)	1578.6, (1523.99, 1633.21)	1505.94, (1457.62, 1554.26)	1507.43, (1445.03, 1569.83)
SDG, plant-based meat alternatives	-39.34, (-259.16, 180.48)	-33.74, (-131.13, 63.65)	-42.35, (-133.3, 48.6)	-36.8, (-135.5, 61.9)	-39.5, (-118.51, 39.51)	-37.29, (-106.62, 32.04)	-34.66, (-123.9, 54.58)		1585.19, (1432.07, 1738.31)	1580.11, (1512.05, 1648.17)	1745.67, (1682.24, 1809.1)	1589.19, (1520.31, 1658.07)	1583.04, (1528.39, 1637.69)	1509.24, (1461.07, 1557.41)	1513.56, (1451.45, 1575.67)
Max red meat 60g/day, plant-based meat alternatives	-42.41, (-261.92, 177.1)	-35.97, (-133.19, 61.25)	-45.09, (-135.96, 45.78)	-38.88, (-137.5, 59.74)	-41.71, (-120.63, 37.21)	-38.93, (-108.21, 30.35)	-36.41, (-125.64, 52.82)		1582.12, (1429.43, 1734.81)	1577.88, (1510.06, 1645.7)	1742.94, (1679.62, 1806.26)	1587.11, (1518.34, 1655.88)	1580.83, (1526.31, 1635.35)	1507.6, (1459.5, 1555.7)	1511.82, (1449.72, 1573.92)
Max red meat 31g/day, plant-based meat alternatives	-54.01, (-272.97, 164.95)	-44.77, (-141.74, 52.2)	-56.54, (-147.15, 34.07)	-47.7, (-146.02, 50.62)	-50.42, (-129.08, 28.24)	-45.75, (-114.95, 23.45)	-44.12, (-133.45, 45.21)		1570.52, (1418.63, 1722.41)	1569.07, (1501.61, 1636.53)	1731.49, (1668.55, 1794.43)	1578.28, (1509.93, 1646.63)	1572.12, (1517.97, 1626.27)	1500.79, (1452.81, 1548.77)	1504.11, (1441.87, 1566.35)
SDG, chicken	-37.99, (-257.94, 181.96)	-32.71, (-130.13, 64.71)	-40.98, (-131.99, 50.03)	-35.61, (-134.35, 63.13)	-38.16, (-117.24, 40.92)	-36.14, (-105.51, 33.23)	-33.81, (-123.05, 55.43)		1586.54, (1433.23, 1739.85)	1581.13, (1513.02, 1649.24)	1747.04, (1683.53, 1810.55)	1590.37, (1521.43, 1659.31)	1584.38, (1529.62, 1639.14)	1510.4, (1462.17, 1558.63)	1514.41, (1452.3, 1576.52)
Max red meat 60g/day, chicken	-40.78, (-260.45, 178.89)	-34.68, (-131.94, 62.58)	-43.41, (-134.35, 47.53)	-37.42, (-136.09, 61.25)	-40.1, (-119.1, 38.9)	-37.54, (-106.86, 31.78)	-35.28, (-124.51, 53.95)		1583.75, (1430.84, 1736.66)	1579.16, (1511.28, 1647.04)	1744.62, (1681.2, 1808.04)	1588.56, (1519.72, 1657.4)	1582.44, (1527.8, 1637.08)	1509.0, (1460.83, 1557.17)	1512.95, (1450.85, 1575.05)
Max red meat 31g/day, chicken	-51.22, (-270.37, 167.93)	-42.4, (-139.43, 54.63)	-53.56, (-144.27, 37.15)	-45.12, (-143.52, 53.28)	-47.67, (-126.43, 31.09)	-43.3, (-112.54, 25.94)	-41.81, (-131.13, 47.51)		1573.31, (1421.15, 1725.47)	1571.44, (1503.89, 1638.99)	1734.46, (1671.37, 1797.55)	1580.86, (1512.4, 1649.32)	1574.87, (1520.58, 1629.16)	1503.24, (1455.19, 1551.29)	1506.41, (1444.18, 1568.64)

## Sheet: Protein
	Change in Protein, g, (95% UI), 16-24	Change in Protein, g, (95% UI), 25-34	Change in Protein, g, (95% UI), 35-44	Change in Protein, g, (95% UI), 45-54	Change in Protein, g, (95% UI), 55-64	Change in Protein, g, (95% UI), 65-74	Change in Protein, g, (95% UI), 75+		Protein, g, (95% UI), 16-24	Protein, g, (95% UI), 25-34	Protein, g, (95% UI), 35-44	Protein, g, (95% UI), 45-54	Protein, g, (95% UI), 55-64	Protein, g, (95% UI), 65-74	Protein, g, (95% UI), 75+
Baseline									66.53, (59.77, 73.29)	66.28, (63.18, 69.38)	73.01, (69.18, 76.84)	66.96, (64.27, 69.65)	66.06, (63.73, 68.39)	65.5, (63.05, 67.95)	65.14, (61.99, 68.29)
CCC 2030	-7.05, (-16.18, 2.08)	-6.9, (-11.04, -2.76)	-7.37, (-12.51, -2.23)	-6.53, (-10.17, -2.89)	-6.62, (-9.75, -3.49)	-6.48, (-9.83, -3.13)	-6.38, (-10.58, -2.18)		59.48, (53.34, 65.62)	59.38, (56.63, 62.13)	65.63, (62.2, 69.06)	60.44, (57.98, 62.9)	59.44, (57.35, 61.53)	59.03, (56.75, 61.31)	58.76, (55.99, 61.53)
CCC 2050	-10.47, (-19.41, -1.53)	-10.29, (-14.32, -6.26)	-10.73, (-15.74, -5.72)	-9.48, (-13.06, -5.9)	-9.54, (-12.61, -6.47)	-9.22, (-12.53, -5.91)	-9.05, (-13.16, -4.94)		56.06, (50.2, 61.92)	55.99, (53.42, 58.56)	62.28, (59.06, 65.5)	57.49, (55.12, 59.86)	56.52, (54.52, 58.52)	56.29, (54.06, 58.52)	56.09, (53.45, 58.73)
SDG	-5.68, (-14.79, 3.43)	-4.88, (-9.01, -0.75)	-6.25, (-11.47, -1.03)	-5.53, (-9.2, -1.86)	-6.04, (-9.13, -2.95)	-5.81, (-9.19, -2.43)	-4.93, (-9.25, -0.61)		60.86, (54.75, 66.97)	61.41, (58.68, 64.14)	66.76, (63.21, 70.31)	61.43, (58.93, 63.93)	60.02, (58.0, 62.04)	59.69, (57.37, 62.01)	60.21, (57.25, 63.17)
Max red meat 60g/day	-6.32, (-15.37, 2.73)	-5.5, (-9.61, -1.39)	-7.02, (-12.23, -1.81)	-6.22, (-9.86, -2.58)	-6.7, (-9.77, -3.63)	-6.44, (-9.83, -3.05)	-5.65, (-9.97, -1.33)		60.22, (54.2, 66.24)	60.78, (58.08, 63.48)	65.99, (62.46, 69.52)	60.74, (58.28, 63.2)	59.35, (57.35, 61.35)	59.07, (56.74, 61.4)	59.49, (56.53, 62.45)
Max red meat 31g/day	-8.99, (-17.96, -0.02)	-8.04, (-12.16, -3.92)	-10.17, (-15.35, -4.99)	-9.02, (-12.58, -5.46)	-9.52, (-12.56, -6.48)	-9.15, (-12.56, -5.74)	-8.61, (-12.92, -4.3)		57.55, (51.65, 63.45)	58.25, (55.54, 60.96)	62.84, (59.35, 66.33)	57.94, (55.61, 60.27)	56.54, (54.59, 58.49)	56.35, (53.97, 58.73)	56.54, (53.6, 59.48)
CCC 2030, pulses & legumes	-5.44, (-14.65, 3.77)	-5.34, (-9.54, -1.14)	-5.71, (-10.91, -0.51)	-5.02, (-8.7, -1.34)	-5.02, (-8.19, -1.85)	-4.88, (-8.25, -1.51)	-4.76, (-9.01, -0.51)		61.09, (54.83, 67.35)	60.94, (58.11, 63.77)	67.3, (63.78, 70.82)	61.95, (59.44, 64.46)	61.04, (58.9, 63.18)	60.62, (58.31, 62.93)	60.39, (57.54, 63.24)
CCC 2050, pulses & legumes	-8.08, (-17.13, 0.97)	-7.98, (-12.08, -3.88)	-8.3, (-13.39, -3.21)	-7.3, (-10.92, -3.68)	-7.27, (-10.39, -4.15)	-7.02, (-10.36, -3.68)	-6.83, (-11.01, -2.65)		58.45, (52.43, 64.47)	58.31, (55.63, 60.99)	64.7, (61.35, 68.05)	59.66, (57.23, 62.09)	58.79, (56.72, 60.86)	58.49, (56.23, 60.75)	58.31, (55.57, 61.05)
SDG, pulses & legumes	-4.27, (-13.47, 4.93)	-3.69, (-7.87, 0.49)	-4.75, (-10.01, 0.51)	-4.17, (-7.86, -0.48)	-4.48, (-7.6, -1.36)	-4.31, (-7.69, -0.93)	-3.58, (-7.93, 0.77)		62.26, (56.01, 68.51)	62.59, (59.79, 65.39)	68.26, (64.65, 71.87)	62.79, (60.27, 65.31)	61.57, (59.5, 63.64)	61.2, (58.87, 63.53)	61.56, (58.56, 64.56)
Max red meat 60g/day, pulses & legumes	-4.73, (-13.89, 4.43)	-4.16, (-8.32, 0.0)	-5.32, (-10.57, -0.07)	-4.7, (-8.36, -1.04)	-4.98, (-8.09, -1.87)	-4.78, (-8.17, -1.39)	-4.12, (-8.46, 0.22)		61.8, (55.62, 67.98)	62.13, (59.35, 64.91)	67.68, (64.09, 71.27)	62.27, (59.79, 64.75)	61.08, (59.03, 63.13)	60.72, (58.39, 63.05)	61.02, (58.03, 64.01)
Max red meat 31g/day, pulses & legumes	-6.68, (-15.76, 2.4)	-6.01, (-10.17, -1.85)	-7.67, (-12.89, -2.45)	-6.8, (-10.39, -3.21)	-7.09, (-10.17, -4.01)	-6.84, (-10.24, -3.44)	-6.34, (-10.67, -2.01)		59.85, (53.79, 65.91)	60.27, (57.49, 63.05)	65.34, (61.79, 68.89)	60.16, (57.78, 62.54)	58.97, (56.97, 60.97)	58.66, (56.3, 61.02)	58.8, (55.83, 61.77)
CCC 2030, vegetables	-6.13, (-15.31, 3.05)	-6.01, (-10.18, -1.84)	-6.38, (-11.55, -1.21)	-5.6, (-9.26, -1.94)	-5.6, (-8.75, -2.45)	-5.42, (-8.78, -2.06)	-5.28, (-9.51, -1.05)		60.4, (54.19, 66.61)	60.28, (57.49, 63.07)	66.63, (63.15, 70.11)	61.36, (58.87, 63.85)	60.46, (58.35, 62.57)	60.09, (57.8, 62.38)	59.86, (57.03, 62.69)
CCC 2050, vegetables	-9.28, (-18.28, -0.28)	-9.14, (-13.2, -5.08)	-9.47, (-14.52, -4.42)	-8.32, (-11.92, -4.72)	-8.29, (-11.38, -5.2)	-7.95, (-11.28, -4.62)	-7.75, (-11.9, -3.6)		57.25, (51.31, 63.19)	57.14, (54.51, 59.77)	63.54, (60.25, 66.83)	58.64, (56.24, 61.04)	57.77, (55.74, 59.8)	57.55, (55.3, 59.8)	57.39, (54.69, 60.09)
SDG, vegetables	-4.82, (-13.98, 4.34)	-4.11, (-8.27, 0.05)	-5.31, (-10.56, -0.06)	-4.66, (-8.34, -0.98)	-5.03, (-8.13, -1.93)	-4.78, (-8.16, -1.4)	-3.93, (-8.28, 0.42)		61.71, (55.53, 67.89)	62.17, (59.4, 64.94)	67.7, (64.11, 71.29)	62.3, (59.79, 64.81)	61.02, (58.98, 63.06)	60.72, (58.39, 63.05)	61.22, (58.22, 64.22)
Max red meat 60g/day, vegetables	-5.4, (-14.5, 3.7)	-4.68, (-8.82, -0.54)	-6.01, (-11.25, -0.77)	-5.29, (-8.94, -1.64)	-5.64, (-8.73, -2.55)	-5.36, (-8.75, -1.97)	-4.59, (-8.94, -0.24)		61.13, (55.03, 67.23)	61.6, (58.86, 64.34)	66.99, (63.42, 70.56)	61.67, (59.2, 64.14)	60.42, (58.4, 62.44)	60.15, (57.81, 62.49)	60.56, (57.57, 63.55)
Max red meat 31g/day, vegetables	-7.83, (-16.85, 1.19)	-6.98, (-11.12, -2.84)	-8.89, (-14.09, -3.69)	-7.85, (-11.42, -4.28)	-8.22, (-11.28, -5.16)	-7.85, (-11.27, -4.43)	-7.29, (-11.63, -2.95)		58.71, (52.73, 64.69)	59.3, (56.55, 62.05)	64.12, (60.6, 67.64)	59.11, (56.76, 61.46)	57.84, (55.86, 59.82)	57.66, (55.28, 60.04)	57.86, (54.88, 60.84)
CCC 2030, egg	-4.13, (-13.41, 5.15)	-4.07, (-8.32, 0.18)	-4.43, (-9.68, 0.82)	-3.9, (-7.61, -0.19)	-3.9, (-7.1, -0.7)	-3.86, (-7.24, -0.48)	-3.75, (-8.04, 0.54)		62.4, (56.03, 68.77)	62.21, (59.31, 65.11)	68.57, (64.98, 72.16)	63.07, (60.52, 65.62)	62.16, (59.98, 64.34)	61.64, (59.31, 63.97)	61.39, (58.48, 64.3)
CCC 2050, egg	-5.79, (-14.96, 3.38)	-5.75, (-9.92, -1.58)	-6.07, (-11.24, -0.9)	-5.34, (-9.01, -1.67)	-5.31, (-8.48, -2.14)	-5.23, (-8.59, -1.87)	-5.07, (-9.3, -0.84)		60.74, (54.55, 66.93)	60.53, (57.74, 63.32)	66.94, (63.46, 70.42)	61.62, (59.12, 64.12)	60.75, (58.61, 62.89)	60.27, (57.97, 62.57)	60.08, (57.26, 62.9)
SDG, egg	-3.21, (-12.52, 6.1)	-2.89, (-7.13, 1.35)	-3.67, (-8.97, 1.63)	-3.24, (-6.95, 0.47)	-3.43, (-6.59, -0.27)	-3.4, (-6.79, -0.01)	-2.91, (-7.26, 1.44)		63.32, (56.92, 69.72)	63.39, (60.5, 66.28)	69.34, (65.68, 73.0)	63.72, (61.17, 66.27)	62.63, (60.49, 64.77)	62.11, (59.77, 64.45)	62.23, (59.23, 65.23)
Max red meat 60g/day, egg	-3.45, (-12.72, 5.82)	-3.15, (-7.38, 1.08)	-4.0, (-9.29, 1.29)	-3.55, (-7.24, 0.14)	-3.72, (-6.88, -0.56)	-3.69, (-7.08, -0.3)	-3.23, (-7.58, 1.12)		63.08, (56.73, 69.43)	63.14, (60.27, 66.01)	69.01, (65.36, 72.66)	63.41, (60.88, 65.94)	62.34, (60.22, 64.46)	61.82, (59.48, 64.16)	61.91, (58.91, 64.91)
Max red meat 31g/day, egg	-4.49, (-13.7, 4.72)	-4.16, (-8.38, 0.06)	-5.33, (-10.6, -0.06)	-4.78, (-8.42, -1.14)	-4.93, (-8.06, -1.8)	-4.92, (-8.32, -1.52)	-4.53, (-8.86, -0.2)		62.04, (55.78, 68.3)	62.13, (59.26, 65.0)	67.68, (64.06, 71.3)	62.19, (59.74, 64.64)	61.13, (59.04, 63.22)	60.58, (58.23, 62.93)	60.61, (57.64, 63.58)
CCC 2030, non-smoked oily fish	-2.45, (-11.83, 6.93)	-2.44, (-6.75, 1.87)	-2.79, (-8.11, 2.53)	-2.46, (-6.21, 1.29)	-2.46, (-5.7, 0.78)	-2.55, (-5.96, 0.86)	-2.46, (-6.8, 1.88)		64.08, (57.58, 70.58)	63.85, (60.85, 66.85)	70.21, (66.52, 73.9)	64.5, (61.89, 67.11)	63.6, (61.36, 65.84)	62.95, (60.58, 65.32)	62.69, (59.71, 65.67)
CCC 2050, non-smoked oily fish	-2.84, (-12.17, 6.49)	-2.9, (-7.18, 1.38)	-3.2, (-8.49, 2.09)	-2.83, (-6.57, 0.91)	-2.79, (-6.03, 0.45)	-2.94, (-6.34, 0.46)	-2.8, (-7.11, 1.51)		63.69, (57.26, 70.12)	63.39, (60.43, 66.35)	69.81, (66.16, 73.46)	64.14, (61.53, 66.75)	63.26, (61.02, 65.5)	62.56, (60.2, 64.92)	62.34, (59.4, 65.28)
SDG, non-smoked oily fish	-1.85, (-11.32, 7.62)	-1.86, (-6.19, 2.47)	-2.29, (-7.65, 3.07)	-2.05, (-5.81, 1.71)	-2.08, (-5.32, 1.16)	-2.23, (-5.65, 1.19)	-2.06, (-6.43, 2.31)		64.68, (58.05, 71.31)	64.42, (61.39, 67.45)	70.71, (66.96, 74.46)	64.91, (62.29, 67.53)	63.98, (61.73, 66.23)	63.27, (60.88, 65.66)	63.08, (60.05, 66.11)
Max red meat 60g/day, non-smoked oily fish	-1.81, (-11.27, 7.65)	-1.86, (-6.19, 2.47)	-2.31, (-7.67, 3.05)	-2.08, (-5.83, 1.67)	-2.09, (-5.33, 1.15)	-2.28, (-5.7, 1.14)	-2.09, (-6.46, 2.28)		64.72, (58.1, 71.34)	64.43, (61.4, 67.46)	70.7, (66.95, 74.45)	64.88, (62.26, 67.5)	63.97, (61.72, 66.22)	63.22, (60.83, 65.61)	63.05, (60.02, 66.08)
Max red meat 31g/day, non-smoked oily fish	-1.68, (-11.11, 7.75)	-1.77, (-6.11, 2.57)	-2.33, (-7.69, 3.03)	-2.18, (-5.92, 1.56)	-2.16, (-5.4, 1.08)	-2.46, (-5.89, 0.97)	-2.21, (-6.59, 2.17)		64.85, (58.27, 71.43)	64.51, (61.47, 67.55)	70.68, (66.92, 74.44)	64.78, (62.18, 67.38)	63.9, (61.65, 66.15)	63.05, (60.65, 65.45)	62.94, (59.91, 65.97)
CCC 2030, plant-based meat alternatives	-4.37, (-13.64, 4.9)	-4.31, (-8.55, -0.07)	-4.67, (-9.91, 0.57)	-4.1, (-7.8, -0.4)	-4.1, (-7.29, -0.91)	-4.05, (-7.43, -0.67)	-3.93, (-8.21, 0.35)		62.16, (55.81, 68.51)	61.98, (59.09, 64.87)	68.34, (64.76, 71.92)	62.86, (60.32, 65.4)	61.95, (59.78, 64.12)	61.45, (59.12, 63.78)	61.21, (58.31, 64.11)
CCC 2050, plant-based meat alternatives	-6.21, (-15.35, 2.93)	-6.16, (-10.32, -2.0)	-6.48, (-11.64, -1.32)	-5.7, (-9.36, -2.04)	-5.67, (-8.83, -2.51)	-5.56, (-8.92, -2.2)	-5.39, (-9.61, -1.17)		60.32, (54.16, 66.48)	60.12, (57.35, 62.89)	66.53, (63.08, 69.98)	61.26, (58.77, 63.75)	60.39, (58.27, 62.51)	59.94, (57.65, 62.23)	59.75, (56.95, 62.55)
SDG, plant-based meat alternatives	-3.41, (-12.69, 5.87)	-3.04, (-7.26, 1.18)	-3.87, (-9.16, 1.42)	-3.41, (-7.11, 0.29)	-3.62, (-6.77, -0.47)	-3.57, (-6.96, -0.18)	-3.04, (-7.39, 1.31)		63.13, (56.76, 69.5)	63.24, (60.37, 66.11)	69.14, (65.49, 72.79)	63.55, (61.0, 66.1)	62.43, (60.31, 64.55)	61.94, (59.61, 64.27)	62.11, (59.11, 65.11)
Max red meat 60g/day, plant-based meat alternatives	-3.69, (-12.94, 5.56)	-3.33, (-7.54, 0.88)	-4.25, (-9.53, 1.03)	-3.76, (-7.44, -0.08)	-3.95, (-7.1, -0.8)	-3.89, (-7.28, -0.5)	-3.4, (-7.75, 0.95)		62.84, (56.52, 69.16)	62.95, (60.1, 65.8)	68.76, (65.13, 72.39)	63.2, (60.68, 65.72)	62.11, (60.0, 64.22)	61.61, (59.27, 63.95)	61.75, (58.76, 64.74)
Max red meat 31g/day, plant-based meat alternatives	-4.9, (-14.09, 4.29)	-4.5, (-8.71, -0.29)	-5.76, (-11.02, -0.5)	-5.15, (-8.78, -1.52)	-5.33, (-8.45, -2.21)	-5.28, (-8.68, -1.88)	-4.86, (-9.19, -0.53)		61.64, (55.42, 67.86)	61.78, (58.93, 64.63)	67.25, (63.65, 70.85)	61.82, (59.39, 64.25)	60.73, (58.66, 62.8)	60.23, (57.88, 62.58)	60.28, (57.31, 63.25)
SDG, chicken	-0.44, (-10.1, 9.22)	-0.79, (-5.25, 3.67)	-0.86, (-6.31, 4.59)	-0.81, (-4.64, 3.02)	-0.67, (-4.02, 2.68)	-1.02, (-4.5, 2.46)	-1.17, (-5.58, 3.24)		66.09, (59.18, 73.0)	65.49, (62.28, 68.7)	72.15, (68.27, 76.03)	66.15, (63.42, 68.88)	65.39, (62.99, 67.79)	64.48, (62.01, 66.95)	63.97, (60.89, 67.05)
Max red meat 60g/day, chicken	-0.1, (-9.79, 9.59)	-0.51, (-4.99, 3.97)	-0.55, (-6.01, 4.91)	-0.56, (-4.41, 3.29)	-0.41, (-3.77, 2.95)	-0.82, (-4.31, 2.67)	-0.91, (-5.33, 3.51)		66.43, (59.48, 73.38)	65.77, (62.54, 69.0)	72.46, (68.56, 76.36)	66.4, (63.65, 69.15)	65.65, (63.23, 68.07)	64.68, (62.2, 67.16)	64.24, (61.14, 67.34)
Max red meat 31g/day, chicken	1.24, (-8.48, 10.96)	0.7, (-3.81, 5.21)	0.79, (-4.72, 6.3)	0.52, (-3.37, 4.41)	0.72, (-2.68, 4.12)	0.1, (-3.42, 3.62)	0.21, (-4.25, 4.67)		67.77, (60.79, 74.75)	66.98, (63.7, 70.26)	73.79, (69.83, 77.75)	67.48, (64.67, 70.29)	66.78, (64.31, 69.25)	65.61, (63.09, 68.13)	65.35, (62.19, 68.51)

## Sheet: Calcium
	Change in Calcium, mg, (95% UI), 16-24	Change in Calcium, mg, (95% UI), 25-34	Change in Calcium, mg, (95% UI), 35-44	Change in Calcium, mg, (95% UI), 45-54	Change in Calcium, mg, (95% UI), 55-64	Change in Calcium, mg, (95% UI), 65-74	Change in Calcium, mg, (95% UI), 75+		Calcium, mg, (95% UI), 16-24	Calcium, mg, (95% UI), 25-34	Calcium, mg, (95% UI), 35-44	Calcium, mg, (95% UI), 45-54	Calcium, mg, (95% UI), 55-64	Calcium, mg, (95% UI), 65-74	Calcium, mg, (95% UI), 75+
Baseline									749.05, (664.42, 833.68)	768.06, (724.35, 811.77)	876.89, (829.33, 924.45)	810.07, (765.0, 855.14)	802.91, (766.48, 839.34)	814.23, (775.52, 852.94)	787.77, (734.05, 841.49)
CCC 2030	-79.71, (-194.0, 34.58)	-74.75, (-133.31, -16.19)	-90.7, (-153.69, -27.71)	-83.94, (-143.5, -24.38)	-87.32, (-135.41, -39.23)	-91.19, (-141.94, -40.44)	-90.85, (-161.48, -20.22)		669.35, (592.54, 746.16)	693.3, (654.33, 732.27)	786.18, (744.88, 827.48)	726.13, (687.2, 765.06)	715.59, (684.2, 746.98)	723.04, (690.21, 755.87)	696.92, (651.06, 742.78)
CCC 2050	-82.45, (-196.85, 31.95)	-77.18, (-135.8, -18.56)	-93.18, (-156.18, -30.18)	-86.05, (-145.54, -26.56)	-89.42, (-137.48, -41.36)	-92.88, (-143.66, -42.1)	-92.56, (-163.25, -21.87)		666.6, (589.62, 743.58)	690.88, (651.82, 729.94)	783.7, (742.39, 825.01)	724.02, (685.19, 762.85)	713.49, (682.13, 744.85)	721.35, (688.49, 754.21)	695.21, (649.26, 741.16)
SDG	-79.17, (-193.18, 34.84)	-74.2, (-132.72, -15.68)	-91.55, (-154.49, -28.61)	-84.58, (-143.97, -25.19)	-88.01, (-136.0, -40.02)	-91.65, (-142.44, -40.86)	-90.24, (-160.81, -19.67)		669.88, (593.48, 746.28)	693.86, (654.95, 732.77)	785.34, (744.11, 826.57)	725.49, (686.81, 764.17)	714.9, (683.66, 746.14)	722.58, (689.69, 755.47)	697.53, (651.76, 743.3)
Max red meat 60g/day	-80.2, (-194.26, 33.86)	-74.97, (-133.48, -16.46)	-92.37, (-155.32, -29.42)	-85.23, (-144.6, -25.86)	-88.71, (-136.68, -40.74)	-92.14, (-142.94, -41.34)	-90.83, (-161.43, -20.23)		668.86, (592.39, 745.33)	693.09, (654.19, 731.99)	784.52, (743.28, 825.76)	724.84, (686.2, 763.48)	714.2, (682.98, 745.42)	722.08, (689.18, 754.98)	696.94, (651.13, 742.75)
Max red meat 31g/day	-84.33, (-198.66, 30.0)	-78.09, (-136.68, -19.5)	-95.81, (-158.79, -32.83)	-88.05, (-147.33, -28.77)	-91.53, (-139.49, -43.57)	-94.28, (-145.1, -43.46)	-93.46, (-164.22, -22.7)		664.72, (587.84, 741.6)	689.96, (650.94, 728.98)	781.08, (739.8, 822.36)	722.01, (683.5, 760.52)	711.38, (680.18, 742.58)	719.95, (687.03, 752.87)	694.31, (648.25, 740.37)
CCC 2030, pulses & legumes	-45.01, (-161.3, 71.28)	-42.73, (-102.45, 16.99)	-52.36, (-117.34, 12.62)	-47.66, (-108.29, 12.97)	-47.27, (-96.18, 1.64)	-48.2, (-100.67, 4.27)	-46.27, (-119.23, 26.69)		704.05, (624.29, 783.81)	725.32, (684.63, 766.01)	824.53, (780.26, 868.8)	762.41, (721.85, 802.97)	755.64, (723.0, 788.28)	766.03, (730.61, 801.45)	741.5, (692.13, 790.87)
CCC 2050, pulses & legumes	-42.19, (-158.74, 74.36)	-39.77, (-99.5, 19.96)	-49.43, (-114.47, 15.61)	-45.02, (-105.63, 15.59)	-44.63, (-93.54, 4.28)	-45.57, (-98.0, 6.86)	-43.71, (-116.71, 29.29)		706.86, (626.73, 786.99)	728.29, (687.58, 769.0)	827.46, (783.1, 871.82)	765.04, (724.52, 805.56)	758.28, (725.64, 790.92)	768.65, (733.29, 804.01)	744.06, (694.62, 793.5)
SDG, pulses & legumes	-45.9, (-162.42, 70.62)	-44.83, (-104.75, 15.09)	-54.35, (-119.35, 10.65)	-49.37, (-110.14, 11.4)	-48.32, (-97.25, 0.61)	-49.29, (-101.76, 3.18)	-47.59, (-120.47, 25.29)		703.15, (623.06, 783.24)	723.22, (682.23, 764.21)	822.54, (778.23, 866.85)	760.7, (719.95, 801.45)	754.59, (721.92, 787.26)	764.93, (729.5, 800.36)	740.18, (690.93, 789.43)
Max red meat 60g/day, pulses & legumes	-45.67, (-162.33, 70.99)	-44.45, (-104.39, 15.49)	-53.78, (-118.82, 11.26)	-48.81, (-109.58, 11.96)	-47.83, (-96.76, 1.1)	-48.73, (-101.2, 3.74)	-46.92, (-119.82, 25.98)		703.38, (623.09, 783.67)	723.61, (682.59, 764.63)	823.11, (778.75, 867.47)	761.25, (720.49, 802.01)	755.08, (722.41, 787.75)	765.5, (730.08, 800.92)	740.85, (691.57, 790.13)
Max red meat 31g/day, pulses & legumes	-44.67, (-161.74, 72.4)	-42.77, (-102.78, 17.24)	-51.48, (-116.64, 13.68)	-46.67, (-107.46, 14.12)	-45.6, (-94.57, 3.37)	-46.21, (-98.64, 6.22)	-44.34, (-117.38, 28.7)		704.38, (623.49, 785.27)	725.29, (684.18, 766.4)	825.41, (780.87, 869.95)	763.39, (722.6, 804.18)	757.31, (724.58, 790.04)	768.02, (732.65, 803.39)	743.43, (693.94, 792.92)
CCC 2030, vegetables	-46.48, (-162.74, 69.78)	-44.16, (-103.89, 15.57)	-53.79, (-118.75, 11.17)	-48.91, (-109.53, 11.71)	-48.52, (-97.42, 0.38)	-49.35, (-101.84, 3.14)	-47.4, (-120.37, 25.57)		702.57, (622.86, 782.28)	723.9, (683.19, 764.61)	823.1, (778.85, 867.35)	761.15, (720.61, 801.69)	754.39, (721.76, 787.02)	764.88, (729.44, 800.32)	740.37, (690.99, 789.75)
CCC 2050, vegetables	-44.77, (-161.25, 71.71)	-42.26, (-102.01, 17.49)	-51.93, (-116.94, 13.08)	-47.22, (-107.81, 13.37)	-46.82, (-95.72, 2.08)	-47.57, (-100.03, 4.89)	-45.69, (-118.7, 27.32)		704.28, (624.25, 784.31)	725.79, (685.05, 766.53)	824.95, (780.63, 869.27)	762.84, (722.35, 803.33)	756.09, (723.47, 788.71)	766.65, (731.25, 802.05)	742.09, (692.64, 791.54)
SDG, vegetables	-47.09, (-163.47, 69.29)	-45.73, (-105.61, 14.15)	-55.56, (-120.53, 9.41)	-50.41, (-111.1, 10.28)	-49.5, (-98.4, -0.6)	-50.31, (-102.81, 2.19)	-48.34, (-121.23, 24.55)		701.97, (622.08, 781.86)	722.32, (681.39, 763.25)	821.33, (777.07, 865.59)	759.66, (719.01, 800.31)	753.41, (720.79, 786.03)	763.92, (728.46, 799.38)	739.43, (690.17, 788.69)
Max red meat 60g/day, vegetables	-47.11, (-163.61, 69.39)	-45.58, (-105.48, 14.32)	-55.26, (-120.26, 9.74)	-50.1, (-110.79, 10.59)	-49.25, (-98.15, -0.35)	-49.96, (-102.45, 2.53)	-47.92, (-120.83, 24.99)		701.94, (621.88, 782.0)	722.48, (681.53, 763.43)	821.63, (777.33, 865.93)	759.97, (719.32, 800.62)	753.66, (721.04, 786.28)	764.27, (728.82, 799.72)	739.86, (690.57, 789.15)
Max red meat 31g/day, vegetables	-47.13, (-164.01, 69.75)	-44.85, (-104.81, 15.11)	-54.1, (-119.2, 11.0)	-48.94, (-109.63, 11.75)	-48.02, (-96.94, 0.9)	-48.36, (-100.83, 4.11)	-46.37, (-119.42, 26.68)		701.92, (621.3, 782.54)	723.21, (682.16, 764.26)	822.79, (778.34, 867.24)	761.13, (720.49, 801.77)	754.89, (722.23, 787.55)	765.87, (730.45, 801.29)	741.4, (691.89, 790.91)
CCC 2030, egg	-42.76, (-159.11, 73.59)	-40.56, (-100.26, 19.14)	-50.17, (-115.17, 14.83)	-45.74, (-106.39, 14.91)	-45.36, (-94.28, 3.56)	-46.46, (-98.9, 5.98)	-44.55, (-117.51, 28.41)		706.29, (626.44, 786.14)	727.5, (686.83, 768.17)	826.71, (782.4, 871.02)	764.32, (723.74, 804.9)	757.56, (724.91, 790.21)	767.77, (732.39, 803.15)	743.22, (693.86, 792.58)
CCC 2050, egg	-38.27, (-154.92, 78.38)	-35.96, (-95.66, 23.74)	-45.6, (-110.68, 19.48)	-41.67, (-102.31, 18.97)	-41.28, (-90.21, 7.65)	-42.52, (-94.9, 9.86)	-40.7, (-113.7, 32.3)		710.79, (630.51, 791.07)	732.1, (691.43, 772.77)	831.28, (786.85, 875.71)	768.39, (727.82, 808.96)	761.63, (728.96, 794.3)	771.71, (736.42, 807.0)	747.08, (697.66, 796.5)
SDG, egg	-44.09, (-160.83, 72.65)	-43.46, (-103.45, 16.53)	-52.51, (-117.57, 12.55)	-47.77, (-108.65, 13.11)	-46.52, (-95.5, 2.46)	-47.74, (-100.18, 4.7)	-46.45, (-119.32, 26.42)		704.97, (624.56, 785.38)	724.6, (683.51, 765.69)	824.38, (779.99, 868.77)	762.29, (721.37, 803.21)	756.39, (723.65, 789.13)	766.49, (731.11, 801.87)	741.32, (692.08, 790.56)
Max red meat 60g/day, egg	-43.48, (-160.38, 73.42)	-42.72, (-102.74, 17.3)	-51.52, (-116.62, 13.58)	-46.86, (-107.75, 14.03)	-45.67, (-94.66, 3.32)	-46.86, (-99.29, 5.57)	-45.4, (-118.29, 27.49)		705.57, (624.92, 786.22)	725.33, (684.2, 766.46)	825.37, (780.92, 869.82)	763.21, (722.27, 804.15)	757.24, (724.49, 789.99)	767.37, (732.0, 802.74)	742.37, (693.11, 791.63)
Max red meat 31g/day, egg	-40.93, (-158.29, 76.43)	-39.59, (-99.67, 20.49)	-47.48, (-112.74, 17.78)	-43.21, (-104.15, 17.73)	-41.91, (-90.96, 7.14)	-42.92, (-95.31, 9.47)	-41.25, (-114.27, 31.77)		708.13, (626.82, 789.44)	728.47, (687.25, 769.69)	829.41, (784.73, 874.09)	766.85, (725.83, 807.87)	761.01, (728.17, 793.85)	771.3, (736.0, 806.6)	746.53, (697.06, 796.0)
CCC 2030, non-smoked oily fish	-44.25, (-160.56, 72.06)	-42.0, (-101.71, 17.71)	-51.62, (-116.6, 13.36)	-47.01, (-107.65, 13.63)	-46.62, (-95.53, 2.29)	-47.61, (-100.07, 4.85)	-45.69, (-118.65, 27.27)		704.8, (625.01, 784.59)	726.06, (685.38, 766.74)	825.27, (780.99, 869.55)	763.05, (722.49, 803.61)	756.29, (723.65, 788.93)	766.62, (731.22, 802.02)	742.08, (692.71, 791.45)
CCC 2050, non-smoked oily fish	-40.87, (-157.45, 75.71)	-38.48, (-98.2, 21.24)	-48.13, (-113.18, 16.92)	-43.89, (-104.51, 16.73)	-43.5, (-92.42, 5.42)	-44.54, (-96.95, 7.87)	-42.69, (-115.69, 30.31)		708.19, (628.01, 788.37)	729.58, (688.88, 770.28)	828.75, (784.37, 873.13)	766.18, (725.64, 806.72)	759.42, (726.77, 792.07)	769.69, (734.36, 805.02)	745.08, (695.65, 794.51)
SDG, non-smoked oily fish	-45.29, (-161.88, 71.3)	-44.37, (-104.32, 15.58)	-53.73, (-118.75, 11.29)	-48.83, (-109.63, 11.97)	-47.71, (-96.66, 1.24)	-48.77, (-101.23, 3.69)	-47.21, (-120.09, 25.67)		703.77, (623.57, 783.97)	723.69, (682.67, 764.71)	823.16, (778.82, 867.5)	761.24, (720.43, 802.05)	755.2, (722.51, 787.89)	765.46, (730.05, 800.87)	740.57, (691.32, 789.82)
Max red meat 60g/day, non-smoked oily fish	-44.93, (-161.67, 71.81)	-43.86, (-103.83, 16.11)	-53.02, (-118.08, 12.04)	-48.15, (-108.96, 12.66)	-47.1, (-96.05, 1.85)	-48.1, (-100.56, 4.36)	-46.41, (-119.3, 26.48)		704.12, (623.71, 784.53)	724.19, (683.13, 765.25)	823.87, (779.48, 868.26)	761.91, (721.09, 802.73)	755.81, (723.11, 788.51)	766.13, (730.73, 801.53)	741.37, (692.1, 790.64)
Max red meat 31g/day, non-smoked oily fish	-43.4, (-160.57, 73.77)	-41.69, (-101.72, 18.34)	-50.12, (-115.31, 15.07)	-45.5, (-106.34, 15.34)	-44.35, (-93.35, 4.65)	-45.1, (-97.52, 7.32)	-43.29, (-116.32, 29.74)		705.65, (624.62, 786.68)	726.36, (685.21, 767.51)	826.76, (782.17, 871.35)	764.56, (723.69, 805.43)	758.56, (725.79, 791.33)	769.13, (733.79, 804.47)	744.48, (695.0, 793.96)
CCC 2030, plant-based meat alternatives	-26.3, (-143.11, 90.51)	-24.59, (-84.2, 35.02)	-34.15, (-99.35, 31.05)	-31.69, (-92.47, 29.09)	-31.31, (-80.32, 17.7)	-33.66, (-85.92, 18.6)	-31.91, (-104.84, 41.02)		722.75, (642.24, 803.26)	743.46, (702.93, 783.99)	842.74, (798.15, 887.33)	778.38, (737.6, 819.16)	771.6, (738.82, 804.38)	780.57, (745.46, 815.68)	755.86, (706.53, 805.19)
CCC 2050, plant-based meat alternatives	-9.46, (-126.96, 108.04)	-8.02, (-67.62, 51.58)	-17.55, (-83.01, 47.91)	-17.08, (-77.97, 43.81)	-16.7, (-65.81, 32.41)	-20.12, (-72.21, 31.97)	-18.58, (-91.57, 54.41)		739.59, (658.08, 821.1)	760.04, (719.52, 800.56)	859.33, (814.35, 904.31)	792.99, (752.05, 833.93)	786.21, (753.27, 819.15)	794.11, (759.25, 828.97)	769.19, (719.77, 818.61)
SDG, plant-based meat alternatives	-30.79, (-149.28, 87.7)	-33.39, (-93.96, 27.18)	-39.03, (-104.57, 26.51)	-36.1, (-97.86, 25.66)	-33.29, (-82.74, 16.16)	-36.34, (-88.64, 15.96)	-38.1, (-110.95, 34.75)		718.26, (635.33, 801.19)	734.66, (692.72, 776.6)	837.86, (792.76, 882.96)	773.97, (731.75, 816.19)	769.62, (736.18, 803.06)	777.88, (742.71, 813.05)	749.67, (700.46, 798.88)
Max red meat 60g/day, plant-based meat alternatives	-27.4, (-146.28, 91.48)	-30.08, (-90.76, 30.6)	-34.95, (-100.62, 30.72)	-32.51, (-94.37, 29.35)	-29.78, (-79.28, 19.72)	-33.11, (-85.4, 19.18)	-34.25, (-107.11, 38.61)		721.65, (638.16, 805.14)	737.97, (695.88, 780.06)	841.94, (796.66, 887.22)	777.56, (735.19, 819.93)	773.13, (739.61, 806.65)	781.12, (745.97, 816.27)	753.53, (704.3, 802.76)
Max red meat 31g/day, plant-based meat alternatives	-13.44, (-133.17, 106.29)	-16.28, (-77.09, 44.53)	-18.14, (-84.29, 48.01)	-17.83, (-80.03, 44.37)	-14.8, (-64.56, 34.96)	-18.82, (-71.02, 33.38)	-18.52, (-91.57, 54.53)		735.61, (650.92, 820.3)	751.77, (709.49, 794.05)	858.74, (812.77, 904.71)	792.24, (749.37, 835.11)	788.11, (754.21, 822.01)	795.4, (760.38, 830.42)	769.25, (719.75, 818.75)
SDG, chicken	-51.01, (-166.93, 64.91)	-48.7, (-108.46, 11.06)	-59.53, (-124.4, 5.34)	-53.85, (-114.32, 6.62)	-53.41, (-102.21, -4.61)	-53.67, (-106.25, -1.09)	-50.8, (-123.72, 22.12)		698.04, (618.82, 777.26)	719.36, (678.61, 760.11)	817.36, (773.24, 861.48)	756.21, (715.9, 796.52)	749.5, (717.03, 781.97)	760.55, (724.96, 796.14)	736.97, (687.66, 786.28)
Max red meat 60g/day, chicken	-51.85, (-167.84, 64.14)	-49.3, (-109.06, 10.46)	-60.15, (-125.03, 4.73)	-54.33, (-114.78, 6.12)	-53.93, (-102.72, -5.14)	-54.01, (-106.59, -1.43)	-51.21, (-124.15, 21.73)		697.2, (617.88, 776.52)	718.75, (678.0, 759.5)	816.74, (772.61, 860.87)	755.74, (715.46, 796.02)	748.98, (716.52, 781.44)	760.21, (724.62, 795.8)	736.57, (687.22, 785.92)
Max red meat 31g/day, chicken	-55.23, (-171.52, 61.06)	-51.72, (-111.55, 8.11)	-62.75, (-127.67, 2.17)	-56.43, (-116.81, 3.95)	-56.02, (-104.8, -7.24)	-55.47, (-108.07, -2.87)	-53.07, (-126.18, 20.04)		693.82, (614.07, 773.57)	716.33, (675.47, 757.19)	814.14, (769.95, 858.33)	753.64, (713.46, 793.82)	746.9, (714.45, 779.35)	758.76, (723.15, 794.37)	734.7, (685.11, 784.29)

## Sheet: Iron
	Change in Iron, mg, (95% UI), 16-24	Change in Iron, mg, (95% UI), 25-34	Change in Iron, mg, (95% UI), 35-44	Change in Iron, mg, (95% UI), 45-54	Change in Iron, mg, (95% UI), 55-64	Change in Iron, mg, (95% UI), 65-74	Change in Iron, mg, (95% UI), 75+		Iron, mg, (95% UI), 16-24	Iron, mg, (95% UI), 25-34	Iron, mg, (95% UI), 35-44	Iron, mg, (95% UI), 45-54	Iron, mg, (95% UI), 55-64	Iron, mg, (95% UI), 65-74	Iron, mg, (95% UI), 75+
Baseline									9.09, (7.97, 10.21)	9.2, (8.68, 9.72)	10.12, (9.65, 10.59)	9.59, (9.13, 10.05)	9.69, (9.29, 10.09)	9.32, (8.94, 9.7)	9.65, (9.17, 10.13)
CCC 2030	-0.21, (-1.8, 1.38)	-0.21, (-0.94, 0.52)	-0.23, (-0.88, 0.42)	-0.19, (-0.84, 0.46)	-0.21, (-0.77, 0.35)	-0.2, (-0.73, 0.33)	-0.2, (-0.88, 0.48)		8.87, (7.75, 9.99)	8.98, (8.47, 9.49)	9.89, (9.43, 10.35)	9.4, (8.94, 9.86)	9.49, (9.1, 9.88)	9.12, (8.75, 9.49)	9.44, (8.96, 9.92)
CCC 2050	-0.37, (-1.96, 1.22)	-0.36, (-1.08, 0.36)	-0.38, (-1.03, 0.27)	-0.33, (-0.98, 0.32)	-0.35, (-0.91, 0.21)	-0.34, (-0.87, 0.19)	-0.34, (-1.02, 0.34)		8.72, (7.6, 9.84)	8.83, (8.32, 9.34)	9.74, (9.29, 10.19)	9.26, (8.8, 9.72)	9.35, (8.96, 9.74)	8.97, (8.6, 9.34)	9.3, (8.82, 9.78)
SDG	-0.21, (-1.78, 1.36)	-0.19, (-0.91, 0.53)	-0.25, (-0.9, 0.4)	-0.2, (-0.85, 0.45)	-0.24, (-0.8, 0.32)	-0.22, (-0.75, 0.31)	-0.16, (-0.84, 0.52)		8.88, (7.78, 9.98)	9.0, (8.49, 9.51)	9.87, (9.41, 10.33)	9.39, (8.93, 9.85)	9.46, (9.07, 9.85)	9.09, (8.72, 9.46)	9.48, (9.0, 9.96)
Max red meat 60g/day	-0.26, (-1.83, 1.31)	-0.24, (-0.96, 0.48)	-0.31, (-0.96, 0.34)	-0.24, (-0.89, 0.41)	-0.28, (-0.83, 0.27)	-0.27, (-0.8, 0.26)	-0.22, (-0.9, 0.46)		8.83, (7.73, 9.93)	8.95, (8.45, 9.45)	9.81, (9.36, 10.26)	9.35, (8.89, 9.81)	9.42, (9.03, 9.81)	9.05, (8.68, 9.42)	9.43, (8.95, 9.91)
Max red meat 31g/day	-0.47, (-2.04, 1.1)	-0.44, (-1.16, 0.28)	-0.52, (-1.16, 0.12)	-0.43, (-1.08, 0.22)	-0.47, (-1.02, 0.08)	-0.47, (-1.0, 0.06)	-0.43, (-1.11, 0.25)		8.62, (7.52, 9.72)	8.76, (8.26, 9.26)	9.6, (9.15, 10.05)	9.16, (8.7, 9.62)	9.22, (8.84, 9.6)	8.85, (8.48, 9.22)	9.22, (8.74, 9.7)
CCC 2030, pulses & legumes	0.2, (-1.4, 1.8)	0.18, (-0.55, 0.91)	0.19, (-0.47, 0.85)	0.18, (-0.47, 0.83)	0.19, (-0.38, 0.76)	0.19, (-0.34, 0.72)	0.19, (-0.5, 0.88)		9.28, (8.14, 10.42)	9.37, (8.85, 9.89)	10.31, (9.84, 10.78)	9.78, (9.32, 10.24)	9.88, (9.48, 10.28)	9.5, (9.12, 9.88)	9.84, (9.35, 10.33)
CCC 2050, pulses & legumes	0.26, (-1.35, 1.87)	0.24, (-0.49, 0.97)	0.25, (-0.41, 0.91)	0.24, (-0.41, 0.89)	0.23, (-0.34, 0.8)	0.21, (-0.32, 0.74)	0.21, (-0.48, 0.9)		9.35, (8.2, 10.5)	9.43, (8.91, 9.95)	10.37, (9.9, 10.84)	9.83, (9.37, 10.29)	9.93, (9.53, 10.33)	9.53, (9.15, 9.91)	9.86, (9.37, 10.35)
SDG, pulses & legumes	0.15, (-1.46, 1.76)	0.09, (-0.64, 0.82)	0.12, (-0.54, 0.78)	0.14, (-0.51, 0.79)	0.15, (-0.42, 0.72)	0.14, (-0.39, 0.67)	0.15, (-0.54, 0.84)		9.23, (8.08, 10.38)	9.29, (8.77, 9.81)	10.24, (9.77, 10.71)	9.73, (9.27, 10.19)	9.84, (9.44, 10.24)	9.46, (9.08, 9.84)	9.8, (9.31, 10.29)
Max red meat 60g/day, pulses & legumes	0.15, (-1.46, 1.76)	0.09, (-0.64, 0.82)	0.12, (-0.54, 0.78)	0.14, (-0.51, 0.79)	0.15, (-0.42, 0.72)	0.14, (-0.39, 0.67)	0.15, (-0.54, 0.84)		9.23, (8.08, 10.38)	9.28, (8.76, 9.8)	10.24, (9.77, 10.71)	9.73, (9.27, 10.19)	9.84, (9.44, 10.24)	9.46, (9.08, 9.84)	9.8, (9.31, 10.29)
Max red meat 31g/day, pulses & legumes	0.13, (-1.49, 1.75)	0.08, (-0.65, 0.81)	0.13, (-0.53, 0.79)	0.15, (-0.5, 0.8)	0.15, (-0.42, 0.72)	0.12, (-0.41, 0.65)	0.14, (-0.55, 0.83)		9.22, (8.06, 10.38)	9.28, (8.77, 9.79)	10.26, (9.79, 10.73)	9.74, (9.28, 10.2)	9.85, (9.45, 10.25)	9.44, (9.06, 9.82)	9.79, (9.3, 10.28)
CCC 2030, vegetables	0.04, (-1.56, 1.64)	0.02, (-0.71, 0.75)	0.04, (-0.62, 0.7)	0.05, (-0.6, 0.7)	0.05, (-0.51, 0.61)	0.06, (-0.47, 0.59)	0.07, (-0.62, 0.76)		9.12, (7.99, 10.25)	9.22, (8.7, 9.74)	10.16, (9.69, 10.63)	9.64, (9.18, 10.1)	9.75, (9.35, 10.15)	9.38, (9.01, 9.75)	9.71, (9.22, 10.2)
CCC 2050, vegetables	-0.02, (-1.62, 1.58)	-0.03, (-0.76, 0.7)	-0.03, (-0.69, 0.63)	-0.0, (-0.65, 0.65)	-0.01, (-0.57, 0.55)	-0.0, (-0.53, 0.53)	0.0, (-0.69, 0.69)		9.07, (7.93, 10.21)	9.16, (8.65, 9.67)	10.09, (9.63, 10.55)	9.59, (9.13, 10.05)	9.69, (9.29, 10.09)	9.32, (8.95, 9.69)	9.65, (9.16, 10.14)
SDG, vegetables	0.02, (-1.57, 1.61)	-0.0, (-0.73, 0.73)	-0.01, (-0.67, 0.65)	0.02, (-0.63, 0.67)	0.02, (-0.54, 0.58)	0.03, (-0.5, 0.56)	0.07, (-0.62, 0.76)		9.11, (7.99, 10.23)	9.19, (8.68, 9.7)	10.11, (9.65, 10.57)	9.61, (9.15, 10.07)	9.71, (9.31, 10.11)	9.35, (8.98, 9.72)	9.72, (9.23, 10.21)
Max red meat 60g/day, vegetables	-0.01, (-1.6, 1.58)	-0.04, (-0.77, 0.69)	-0.04, (-0.7, 0.62)	0.0, (-0.65, 0.65)	-0.01, (-0.57, 0.55)	0.0, (-0.53, 0.53)	0.04, (-0.65, 0.73)		9.08, (7.96, 10.2)	9.16, (8.65, 9.67)	10.08, (9.62, 10.54)	9.59, (9.13, 10.05)	9.69, (9.3, 10.08)	9.32, (8.95, 9.69)	9.69, (9.2, 10.18)
Max red meat 31g/day, vegetables	-0.13, (-1.72, 1.46)	-0.14, (-0.86, 0.58)	-0.15, (-0.8, 0.5)	-0.1, (-0.75, 0.55)	-0.11, (-0.67, 0.45)	-0.11, (-0.64, 0.42)	-0.08, (-0.77, 0.61)		8.96, (7.83, 10.09)	9.05, (8.54, 9.56)	9.97, (9.51, 10.43)	9.5, (9.04, 9.96)	9.58, (9.19, 9.97)	9.21, (8.84, 9.58)	9.57, (9.08, 10.06)
CCC 2030, egg	0.23, (-1.37, 1.83)	0.21, (-0.52, 0.94)	0.23, (-0.43, 0.89)	0.22, (-0.43, 0.87)	0.22, (-0.35, 0.79)	0.21, (-0.32, 0.74)	0.22, (-0.47, 0.91)		9.32, (8.18, 10.46)	9.41, (8.89, 9.93)	10.35, (9.88, 10.82)	9.81, (9.35, 10.27)	9.91, (9.51, 10.31)	9.53, (9.15, 9.91)	9.87, (9.38, 10.36)
CCC 2050, egg	0.33, (-1.28, 1.94)	0.3, (-0.43, 1.03)	0.31, (-0.35, 0.97)	0.29, (-0.36, 0.94)	0.29, (-0.28, 0.86)	0.26, (-0.27, 0.79)	0.26, (-0.43, 0.95)		9.41, (8.26, 10.56)	9.49, (8.97, 10.01)	10.43, (9.96, 10.9)	9.88, (9.42, 10.34)	9.98, (9.58, 10.38)	9.58, (9.2, 9.96)	9.91, (9.42, 10.4)
SDG, egg	0.18, (-1.43, 1.79)	0.12, (-0.61, 0.85)	0.15, (-0.51, 0.81)	0.16, (-0.49, 0.81)	0.18, (-0.39, 0.75)	0.17, (-0.36, 0.7)	0.17, (-0.52, 0.86)		9.26, (8.11, 10.41)	9.31, (8.79, 9.83)	10.27, (9.8, 10.74)	9.75, (9.29, 10.21)	9.87, (9.46, 10.28)	9.48, (9.1, 9.86)	9.82, (9.33, 10.31)
Max red meat 60g/day, egg	0.18, (-1.43, 1.79)	0.11, (-0.62, 0.84)	0.16, (-0.5, 0.82)	0.17, (-0.48, 0.82)	0.18, (-0.39, 0.75)	0.17, (-0.36, 0.7)	0.18, (-0.51, 0.87)		9.27, (8.11, 10.43)	9.31, (8.79, 9.83)	10.28, (9.81, 10.75)	9.76, (9.3, 10.22)	9.88, (9.47, 10.29)	9.49, (9.11, 9.87)	9.83, (9.34, 10.32)
Max red meat 31g/day, egg	0.2, (-1.42, 1.82)	0.13, (-0.6, 0.86)	0.2, (-0.46, 0.86)	0.21, (-0.44, 0.86)	0.21, (-0.36, 0.78)	0.18, (-0.36, 0.72)	0.19, (-0.5, 0.88)		9.28, (8.11, 10.45)	9.33, (8.81, 9.85)	10.32, (9.85, 10.79)	9.8, (9.34, 10.26)	9.91, (9.5, 10.32)	9.49, (9.11, 9.87)	9.84, (9.35, 10.33)
CCC 2030, non-smoked oily fish	0.01, (-1.59, 1.61)	-0.0, (-0.73, 0.73)	0.01, (-0.65, 0.67)	0.03, (-0.62, 0.68)	0.03, (-0.53, 0.59)	0.04, (-0.49, 0.57)	0.05, (-0.64, 0.74)		9.1, (7.97, 10.23)	9.19, (8.67, 9.71)	10.13, (9.67, 10.59)	9.62, (9.16, 10.08)	9.73, (9.33, 10.13)	9.36, (8.99, 9.73)	9.7, (9.21, 10.19)
CCC 2050, non-smoked oily fish	-0.06, (-1.66, 1.54)	-0.08, (-0.81, 0.65)	-0.07, (-0.73, 0.59)	-0.04, (-0.69, 0.61)	-0.04, (-0.6, 0.52)	-0.04, (-0.57, 0.49)	-0.03, (-0.72, 0.66)		9.03, (7.9, 10.16)	9.12, (8.61, 9.63)	10.05, (9.59, 10.51)	9.55, (9.09, 10.01)	9.65, (9.25, 10.05)	9.28, (8.91, 9.65)	9.62, (9.13, 10.11)
SDG, non-smoked oily fish	-0.0, (-1.59, 1.59)	-0.02, (-0.75, 0.71)	-0.03, (-0.69, 0.63)	0.01, (-0.64, 0.66)	-0.0, (-0.56, 0.56)	0.01, (-0.52, 0.54)	0.06, (-0.63, 0.75)		9.09, (7.97, 10.21)	9.18, (8.67, 9.69)	10.09, (9.63, 10.55)	9.6, (9.14, 10.06)	9.69, (9.3, 10.08)	9.33, (8.96, 9.7)	9.71, (9.22, 10.2)
Max red meat 60g/day, non-smoked oily fish	-0.03, (-1.62, 1.56)	-0.05, (-0.78, 0.68)	-0.06, (-0.72, 0.6)	-0.02, (-0.67, 0.63)	-0.03, (-0.59, 0.53)	-0.02, (-0.55, 0.51)	0.03, (-0.66, 0.72)		9.05, (7.93, 10.17)	9.14, (8.63, 9.65)	10.06, (9.6, 10.52)	9.57, (9.11, 10.03)	9.67, (9.28, 10.06)	9.3, (8.93, 9.67)	9.68, (9.19, 10.17)
Max red meat 31g/day, non-smoked oily fish	-0.17, (-1.76, 1.42)	-0.18, (-0.9, 0.54)	-0.19, (-0.84, 0.46)	-0.13, (-0.78, 0.52)	-0.15, (-0.71, 0.41)	-0.15, (-0.68, 0.38)	-0.11, (-0.8, 0.58)		8.92, (7.79, 10.05)	9.02, (8.51, 9.53)	9.93, (9.47, 10.39)	9.46, (9.0, 9.92)	9.54, (9.15, 9.93)	9.17, (8.8, 9.54)	9.53, (9.04, 10.02)
CCC 2030, plant-based meat alternatives	0.2, (-1.4, 1.8)	0.18, (-0.55, 0.91)	0.19, (-0.47, 0.85)	0.19, (-0.46, 0.84)	0.19, (-0.38, 0.76)	0.19, (-0.34, 0.72)	0.19, (-0.5, 0.88)		9.29, (8.15, 10.43)	9.37, (8.85, 9.89)	10.31, (9.84, 10.78)	9.78, (9.32, 10.24)	9.88, (9.48, 10.28)	9.51, (9.13, 9.89)	9.84, (9.35, 10.33)
CCC 2050, plant-based meat alternatives	0.26, (-1.35, 1.87)	0.24, (-0.49, 0.97)	0.25, (-0.41, 0.91)	0.24, (-0.41, 0.89)	0.23, (-0.34, 0.8)	0.22, (-0.31, 0.75)	0.22, (-0.47, 0.91)		9.35, (8.2, 10.5)	9.43, (8.91, 9.95)	10.37, (9.9, 10.84)	9.83, (9.37, 10.29)	9.93, (9.53, 10.33)	9.54, (9.16, 9.92)	9.87, (9.38, 10.36)
SDG, plant-based meat alternatives	0.15, (-1.46, 1.76)	0.09, (-0.64, 0.82)	0.12, (-0.54, 0.78)	0.14, (-0.51, 0.79)	0.15, (-0.42, 0.72)	0.14, (-0.39, 0.67)	0.16, (-0.53, 0.85)		9.24, (8.09, 10.39)	9.29, (8.77, 9.81)	10.24, (9.77, 10.71)	9.73, (9.27, 10.19)	9.84, (9.44, 10.24)	9.46, (9.08, 9.84)	9.8, (9.31, 10.29)
Max red meat 60g/day, plant-based meat alternatives	0.15, (-1.46, 1.76)	0.09, (-0.64, 0.82)	0.12, (-0.54, 0.78)	0.14, (-0.51, 0.79)	0.15, (-0.42, 0.72)	0.14, (-0.39, 0.67)	0.15, (-0.54, 0.84)		9.24, (8.09, 10.39)	9.28, (8.76, 9.8)	10.24, (9.77, 10.71)	9.73, (9.27, 10.19)	9.84, (9.44, 10.24)	9.46, (9.08, 9.84)	9.8, (9.31, 10.29)
Max red meat 31g/day, plant-based meat alternatives	0.14, (-1.48, 1.76)	0.08, (-0.65, 0.81)	0.14, (-0.52, 0.8)	0.15, (-0.5, 0.8)	0.16, (-0.41, 0.73)	0.12, (-0.41, 0.65)	0.14, (-0.55, 0.83)		9.23, (8.07, 10.39)	9.28, (8.77, 9.79)	10.26, (9.79, 10.73)	9.74, (9.28, 10.2)	9.85, (9.45, 10.25)	9.44, (9.06, 9.82)	9.79, (9.3, 10.28)
SDG, chicken	-0.03, (-1.61, 1.55)	-0.04, (-0.77, 0.69)	-0.06, (-0.72, 0.6)	-0.02, (-0.67, 0.63)	-0.03, (-0.59, 0.53)	-0.01, (-0.54, 0.52)	0.05, (-0.64, 0.74)		9.06, (7.94, 10.18)	9.16, (8.65, 9.67)	10.06, (9.6, 10.52)	9.57, (9.11, 10.03)	9.67, (9.28, 10.06)	9.31, (8.94, 9.68)	9.69, (9.2, 10.18)
Max red meat 60g/day, chicken	-0.06, (-1.64, 1.52)	-0.08, (-0.81, 0.65)	-0.1, (-0.75, 0.55)	-0.05, (-0.7, 0.6)	-0.06, (-0.62, 0.5)	-0.04, (-0.57, 0.49)	0.01, (-0.68, 0.7)		9.02, (7.9, 10.14)	9.12, (8.61, 9.63)	10.03, (9.57, 10.49)	9.54, (9.08, 10.0)	9.63, (9.24, 10.02)	9.28, (8.91, 9.65)	9.65, (9.16, 10.14)
Max red meat 31g/day, chicken	-0.23, (-1.82, 1.36)	-0.22, (-0.94, 0.5)	-0.25, (-0.9, 0.4)	-0.18, (-0.83, 0.47)	-0.2, (-0.76, 0.36)	-0.19, (-0.72, 0.34)	-0.16, (-0.85, 0.53)		8.86, (7.74, 9.98)	8.97, (8.47, 9.47)	9.87, (9.42, 10.32)	9.41, (8.95, 9.87)	9.49, (9.1, 9.88)	9.12, (8.75, 9.49)	9.49, (9.0, 9.98)

## Sheet: Iodine
	Change in Iodine, ug, (95% UI), 16-24	Change in Iodine, ug, (95% UI), 25-34	Change in Iodine, ug, (95% UI), 35-44	Change in Iodine, ug, (95% UI), 45-54	Change in Iodine, ug, (95% UI), 55-64	Change in Iodine, ug, (95% UI), 65-74	Change in Iodine, ug, (95% UI), 75+		Iodine, ug, (95% UI), 16-24	Iodine, ug, (95% UI), 25-34	Iodine, ug, (95% UI), 35-44	Iodine, ug, (95% UI), 45-54	Iodine, ug, (95% UI), 55-64	Iodine, ug, (95% UI), 65-74	Iodine, ug, (95% UI), 75+
Baseline									124.69, (111.58, 137.8)	121.46, (112.46, 130.46)	151.26, (139.91, 162.61)	145.47, (136.64, 154.3)	153.16, (145.43, 160.89)	164.11, (153.72, 174.5)	167.99, (153.87, 182.11)
CCC 2030	-14.56, (-32.21, 3.09)	-13.39, (-25.57, -1.21)	-16.29, (-31.8, -0.78)	-15.38, (-27.48, -3.28)	-16.68, (-27.26, -6.1)	-18.05, (-32.13, -3.97)	-18.37, (-37.58, 0.84)		110.14, (98.32, 121.96)	108.07, (99.86, 116.28)	134.97, (124.4, 145.54)	130.09, (121.82, 138.36)	136.48, (129.26, 143.7)	146.06, (136.55, 155.57)	149.63, (136.61, 162.65)
CCC 2050	-15.59, (-33.23, 2.05)	-14.4, (-26.59, -2.21)	-17.3, (-32.8, -1.8)	-16.25, (-28.35, -4.15)	-17.54, (-28.12, -6.96)	-18.86, (-32.96, -4.76)	-19.13, (-38.36, 0.1)		109.1, (97.29, 120.91)	107.06, (98.85, 115.27)	133.96, (123.4, 144.52)	129.22, (120.95, 137.49)	135.62, (128.39, 142.85)	145.25, (135.71, 154.79)	148.86, (135.81, 161.91)
SDG	-14.18, (-31.82, 3.46)	-12.92, (-25.06, -0.78)	-16.12, (-31.63, -0.61)	-15.21, (-27.33, -3.09)	-16.59, (-27.15, -6.03)	-17.99, (-32.09, -3.89)	-17.92, (-37.12, 1.28)		110.51, (98.71, 122.31)	108.54, (100.4, 116.68)	135.14, (124.56, 145.72)	130.26, (121.96, 138.56)	136.57, (129.37, 143.77)	146.12, (136.59, 155.65)	150.07, (137.06, 163.08)
Max red meat 60g/day	-14.45, (-32.09, 3.19)	-13.17, (-25.3, -1.04)	-16.39, (-31.9, -0.88)	-15.44, (-27.56, -3.32)	-16.81, (-27.37, -6.25)	-18.2, (-32.3, -4.1)	-18.14, (-37.35, 1.07)		110.24, (98.44, 122.04)	108.3, (100.17, 116.43)	134.87, (124.29, 145.45)	130.03, (121.73, 138.33)	136.35, (129.16, 143.54)	145.91, (136.37, 155.45)	149.85, (136.83, 162.87)
Max red meat 31g/day	-15.56, (-33.22, 2.1)	-14.14, (-26.28, -2.0)	-17.55, (-33.06, -2.04)	-16.39, (-28.5, -4.28)	-17.76, (-28.31, -7.21)	-19.11, (-33.23, -4.99)	-19.11, (-38.35, 0.13)		109.13, (97.29, 120.97)	107.33, (99.18, 115.48)	133.71, (123.13, 144.29)	129.08, (120.79, 137.37)	135.4, (128.22, 142.58)	145.0, (135.43, 154.57)	148.89, (135.82, 161.96)
CCC 2030, pulses & legumes	-12.58, (-30.35, 5.19)	-11.4, (-23.67, 0.87)	-14.03, (-29.6, 1.54)	-13.24, (-25.39, -1.09)	-14.32, (-24.93, -3.71)	-15.56, (-29.7, -1.42)	-15.76, (-35.06, 3.54)		112.12, (100.13, 124.11)	110.07, (101.73, 118.41)	137.23, (126.57, 147.89)	132.22, (123.87, 140.57)	138.85, (131.58, 146.12)	148.55, (138.95, 158.15)	152.23, (139.07, 165.39)
CCC 2050, pulses & legumes	-13.24, (-31.01, 4.53)	-12.04, (-24.32, 0.24)	-14.68, (-30.25, 0.89)	-13.79, (-25.94, -1.64)	-14.85, (-25.46, -4.24)	-16.08, (-30.24, -1.92)	-16.23, (-35.55, 3.09)		111.46, (99.46, 123.46)	109.43, (101.09, 117.77)	136.58, (125.92, 147.24)	131.68, (123.33, 140.03)	138.31, (131.04, 145.58)	148.03, (138.41, 157.65)	151.76, (138.58, 164.94)
SDG, pulses & legumes	-12.3, (-30.08, 5.48)	-11.12, (-23.37, 1.13)	-13.94, (-29.52, 1.64)	-13.15, (-25.31, -0.99)	-14.26, (-24.86, -3.66)	-15.54, (-29.69, -1.39)	-15.45, (-34.75, 3.85)		112.39, (100.38, 124.4)	110.35, (102.05, 118.65)	137.32, (126.65, 147.99)	132.32, (123.95, 140.69)	138.91, (131.66, 146.16)	148.56, (138.95, 158.17)	152.54, (139.39, 165.69)
Max red meat 60g/day, pulses & legumes	-12.49, (-30.27, 5.29)	-11.28, (-23.53, 0.97)	-14.12, (-29.7, 1.46)	-13.29, (-25.45, -1.13)	-14.39, (-24.98, -3.8)	-15.68, (-29.84, -1.52)	-15.58, (-34.88, 3.72)		112.21, (100.2, 124.22)	110.19, (101.89, 118.49)	137.14, (126.47, 147.81)	132.17, (123.8, 140.54)	138.77, (131.53, 146.01)	148.43, (138.81, 158.05)	152.41, (139.25, 165.57)
Max red meat 31g/day, pulses & legumes	-13.24, (-31.05, 4.57)	-11.92, (-24.18, 0.34)	-14.88, (-30.46, 0.7)	-13.91, (-26.07, -1.75)	-15.0, (-25.59, -4.41)	-16.28, (-30.45, -2.11)	-16.19, (-35.52, 3.14)		111.45, (99.39, 123.51)	109.55, (101.24, 117.86)	136.38, (125.71, 147.05)	131.56, (123.2, 139.92)	138.17, (130.93, 145.41)	147.83, (138.19, 157.47)	151.81, (138.62, 165.0)
CCC 2030, vegetables	-12.76, (-30.52, 5.0)	-11.57, (-23.84, 0.7)	-14.21, (-29.78, 1.36)	-13.4, (-25.55, -1.25)	-14.47, (-25.08, -3.86)	-15.7, (-29.84, -1.56)	-15.9, (-35.21, 3.41)		111.94, (99.96, 123.92)	109.89, (101.55, 118.23)	137.05, (126.39, 147.71)	132.07, (123.72, 140.42)	138.69, (131.42, 145.96)	148.41, (138.81, 158.01)	152.09, (138.93, 165.25)
CCC 2050, vegetables	-13.55, (-31.31, 4.21)	-12.34, (-24.62, -0.06)	-14.98, (-30.54, 0.58)	-14.06, (-26.21, -1.91)	-15.12, (-25.73, -4.51)	-16.32, (-30.48, -2.16)	-16.47, (-35.79, 2.85)		111.14, (99.15, 123.13)	109.12, (100.78, 117.46)	136.28, (125.63, 146.93)	131.41, (123.07, 139.75)	138.04, (130.77, 145.31)	147.78, (138.15, 157.41)	151.52, (138.33, 164.71)
SDG, vegetables	-12.45, (-30.21, 5.31)	-11.23, (-23.47, 1.01)	-14.09, (-29.66, 1.48)	-13.28, (-25.44, -1.12)	-14.4, (-24.99, -3.81)	-15.67, (-29.83, -1.51)	-15.54, (-34.84, 3.76)		112.25, (100.27, 124.23)	110.24, (101.95, 118.53)	137.17, (126.5, 147.84)	132.19, (123.82, 140.56)	138.76, (131.51, 146.01)	148.44, (138.82, 158.06)	152.45, (139.3, 165.6)
Max red meat 60g/day, vegetables	-12.67, (-30.44, 5.1)	-11.42, (-23.66, 0.82)	-14.3, (-29.87, 1.27)	-13.45, (-25.61, -1.29)	-14.57, (-25.16, -3.98)	-15.83, (-29.99, -1.67)	-15.7, (-35.01, 3.61)		112.03, (100.04, 124.02)	110.05, (101.76, 118.34)	136.96, (126.3, 147.62)	132.02, (123.65, 140.39)	138.6, (131.36, 145.84)	148.27, (138.64, 157.9)	152.29, (139.13, 165.45)
Max red meat 31g/day, vegetables	-13.54, (-31.33, 4.25)	-12.17, (-24.42, 0.08)	-15.2, (-30.77, 0.37)	-14.18, (-26.34, -2.02)	-15.29, (-25.87, -4.71)	-16.54, (-30.72, -2.36)	-16.44, (-35.77, 2.89)		111.15, (99.12, 123.18)	109.29, (100.99, 117.59)	136.05, (125.38, 146.72)	131.28, (122.92, 139.64)	137.87, (130.64, 145.1)	147.57, (137.92, 157.22)	151.56, (138.36, 164.76)
CCC 2030, egg	-3.53, (-21.62, 14.56)	-2.62, (-14.96, 9.72)	-5.22, (-20.93, 10.49)	-5.52, (-17.73, 6.69)	-6.6, (-17.23, 4.03)	-8.52, (-22.55, 5.51)	-8.82, (-28.01, 10.37)		121.16, (108.69, 133.63)	118.84, (110.4, 127.28)	146.04, (135.18, 156.9)	139.95, (131.52, 148.38)	146.56, (139.26, 153.86)	155.58, (146.14, 165.02)	159.18, (146.2, 172.16)
CCC 2050, egg	2.6, (-15.79, 20.99)	3.32, (-9.11, 15.75)	0.74, (-15.09, 16.57)	-0.27, (-12.53, 11.99)	-1.35, (-12.01, 9.31)	-3.76, (-17.74, 10.22)	-4.08, (-23.21, 15.05)		127.29, (114.39, 140.19)	124.78, (116.22, 133.34)	152.0, (140.97, 163.03)	145.2, (136.69, 153.71)	151.82, (144.47, 159.17)	160.34, (150.99, 169.69)	163.92, (151.02, 176.82)
SDG, egg	-4.99, (-23.71, 13.73)	-5.58, (-18.39, 7.23)	-6.53, (-22.29, 9.23)	-6.73, (-18.93, 5.47)	-6.98, (-17.77, 3.81)	-9.28, (-23.35, 4.79)	-10.86, (-30.06, 8.34)		119.7, (106.34, 133.06)	115.88, (106.76, 125.0)	144.73, (133.79, 155.67)	138.74, (130.32, 147.16)	146.18, (138.65, 153.71)	154.83, (145.33, 164.33)	157.14, (144.13, 170.15)
Max red meat 60g/day, egg	-3.65, (-22.48, 15.18)	-4.33, (-17.19, 8.53)	-5.01, (-20.81, 10.79)	-5.41, (-17.64, 6.82)	-5.66, (-16.5, 5.18)	-8.12, (-22.19, 5.95)	-9.45, (-28.62, 9.72)		121.04, (107.53, 134.55)	117.14, (107.96, 126.32)	146.25, (135.26, 157.24)	140.06, (131.6, 148.52)	147.5, (139.91, 155.09)	155.98, (146.48, 165.48)	158.54, (145.59, 171.49)
Max red meat 31g/day, egg	1.86, (-17.22, 20.94)	0.89, (-12.03, 13.81)	1.24, (-14.66, 17.14)	0.05, (-12.29, 12.39)	-0.1, (-11.07, 10.87)	-3.03, (-17.11, 11.05)	-3.7, (-22.79, 15.39)		126.56, (112.69, 140.43)	122.36, (113.09, 131.63)	152.5, (141.37, 163.63)	145.51, (136.88, 154.14)	153.07, (145.29, 160.85)	161.08, (151.57, 170.59)	164.29, (151.45, 177.13)
CCC 2030, non-smoked oily fish	-9.5, (-27.37, 8.37)	-8.41, (-20.7, 3.88)	-11.03, (-26.65, 4.59)	-10.61, (-22.78, 1.56)	-11.69, (-22.3, -1.08)	-13.16, (-27.26, 0.94)	-13.4, (-32.66, 5.86)		115.2, (103.06, 127.34)	113.06, (104.7, 121.42)	140.23, (129.5, 150.96)	134.85, (126.48, 143.22)	141.47, (134.2, 148.74)	150.94, (141.4, 160.48)	154.6, (141.51, 167.69)
CCC 2050, non-smoked oily fish	-7.84, (-25.79, 10.11)	-6.81, (-19.11, 5.49)	-9.42, (-25.06, 6.22)	-9.18, (-21.36, 3.0)	-10.25, (-20.87, 0.37)	-11.88, (-25.97, 2.21)	-12.09, (-31.33, 7.15)		116.85, (104.58, 129.12)	114.66, (106.27, 123.05)	141.84, (131.07, 152.61)	136.28, (127.89, 144.67)	142.91, (135.63, 150.19)	152.22, (142.7, 161.74)	155.9, (142.83, 168.97)
SDG, non-smoked oily fish	-9.81, (-27.85, 8.23)	-9.23, (-21.64, 3.18)	-11.42, (-27.04, 4.2)	-10.96, (-23.11, 1.19)	-11.78, (-22.42, -1.14)	-13.41, (-27.51, 0.69)	-13.89, (-33.14, 5.36)		114.88, (102.48, 127.28)	112.23, (103.69, 120.77)	139.84, (129.11, 150.57)	134.51, (126.16, 142.86)	141.38, (134.07, 148.69)	150.7, (141.16, 160.24)	154.11, (141.03, 167.19)
Max red meat 60g/day, non-smoked oily fish	-9.48, (-27.56, 8.6)	-8.91, (-21.33, 3.51)	-11.02, (-26.64, 4.6)	-10.61, (-22.76, 1.54)	-11.42, (-22.07, -0.77)	-13.11, (-27.21, 0.99)	-13.49, (-32.73, 5.75)		115.22, (102.77, 127.67)	112.55, (103.99, 121.11)	140.24, (129.51, 150.97)	134.86, (126.51, 143.21)	141.74, (134.42, 149.06)	151.0, (141.46, 160.54)	154.5, (141.43, 167.57)
Max red meat 31g/day, non-smoked oily fish	-8.1, (-26.26, 10.06)	-7.55, (-19.98, 4.88)	-9.39, (-25.03, 6.25)	-9.15, (-21.33, 3.03)	-9.92, (-20.59, 0.75)	-11.76, (-25.86, 2.34)	-11.93, (-31.15, 7.29)		116.6, (104.04, 129.16)	113.91, (105.34, 122.48)	141.87, (131.11, 152.63)	136.31, (127.92, 144.7)	143.24, (135.88, 150.6)	152.34, (142.8, 161.88)	156.06, (143.03, 169.09)
CCC 2030, plant-based meat alternatives	-12.28, (-30.05, 5.49)	-11.11, (-23.38, 1.16)	-13.74, (-29.32, 1.84)	-12.99, (-25.14, -0.84)	-14.06, (-24.67, -3.45)	-15.33, (-29.47, -1.19)	-15.53, (-34.83, 3.77)		112.42, (100.42, 124.42)	110.36, (102.02, 118.7)	137.52, (126.85, 148.19)	132.48, (124.13, 140.83)	139.1, (131.83, 146.37)	148.78, (139.19, 158.37)	152.46, (139.31, 165.61)
CCC 2050, plant-based meat alternatives	-12.71, (-30.5, 5.08)	-11.53, (-23.81, 0.75)	-14.17, (-29.74, 1.4)	-13.34, (-25.49, -1.19)	-14.41, (-25.02, -3.8)	-15.67, (-29.82, -1.52)	-15.83, (-35.14, 3.48)		111.98, (99.96, 124.0)	109.93, (101.58, 118.28)	137.09, (126.42, 147.76)	132.12, (123.77, 140.47)	138.76, (131.49, 146.03)	148.44, (138.83, 158.05)	152.16, (138.99, 165.33)
SDG, plant-based meat alternatives	-12.06, (-29.86, 5.74)	-10.93, (-23.19, 1.33)	-13.7, (-29.28, 1.88)	-12.94, (-25.1, -0.78)	-14.02, (-24.62, -3.42)	-15.33, (-29.48, -1.18)	-15.3, (-34.59, 3.99)		112.63, (100.59, 124.67)	110.53, (102.21, 118.85)	137.56, (126.89, 148.23)	132.53, (124.17, 140.89)	139.15, (131.9, 146.4)	148.77, (139.16, 158.38)	152.7, (139.56, 165.84)
Max red meat 60g/day, plant-based meat alternatives	-12.2, (-30.01, 5.61)	-11.05, (-23.31, 1.21)	-13.82, (-29.4, 1.76)	-13.03, (-25.19, -0.87)	-14.1, (-24.7, -3.5)	-15.43, (-29.58, -1.28)	-15.38, (-34.68, 3.92)		112.5, (100.45, 124.55)	110.42, (102.1, 118.74)	137.44, (126.77, 148.11)	132.43, (124.07, 140.79)	139.06, (131.81, 146.31)	148.68, (139.07, 158.29)	152.62, (139.47, 165.77)
Max red meat 31g/day, plant-based meat alternatives	-12.74, (-30.58, 5.1)	-11.49, (-23.76, 0.78)	-14.35, (-29.93, 1.23)	-13.44, (-25.6, -1.28)	-14.5, (-25.09, -3.91)	-15.84, (-30.0, -1.68)	-15.78, (-35.09, 3.53)		111.95, (99.85, 124.05)	109.97, (101.63, 118.31)	136.91, (126.24, 147.58)	132.02, (123.66, 140.38)	138.66, (131.41, 145.91)	148.27, (138.64, 157.9)	152.22, (139.05, 165.39)
SDG, chicken	-11.69, (-29.53, 6.15)	-10.65, (-22.93, 1.63)	-13.32, (-28.9, 2.26)	-12.61, (-24.77, -0.45)	-13.65, (-24.25, -3.05)	-15.02, (-29.16, -0.88)	-15.07, (-34.35, 4.21)		113.0, (100.91, 125.09)	110.81, (102.45, 119.17)	137.94, (127.26, 148.62)	132.86, (124.5, 141.22)	139.52, (132.26, 146.78)	149.09, (139.5, 158.68)	152.93, (139.8, 166.06)
Max red meat 60g/day, chicken	-11.75, (-29.6, 6.1)	-10.7, (-22.99, 1.59)	-13.36, (-28.94, 2.22)	-12.63, (-24.79, -0.47)	-13.66, (-24.26, -3.06)	-15.05, (-29.19, -0.91)	-15.07, (-34.36, 4.22)		112.94, (100.83, 125.05)	110.77, (102.41, 119.13)	137.9, (127.22, 148.58)	132.83, (124.47, 141.19)	139.5, (132.24, 146.76)	149.06, (139.46, 158.66)	152.93, (139.8, 166.06)
Max red meat 31g/day, chicken	-11.98, (-29.87, 5.91)	-10.85, (-23.14, 1.44)	-13.53, (-29.12, 2.06)	-12.74, (-24.9, -0.58)	-13.75, (-24.35, -3.15)	-15.17, (-29.32, -1.02)	-15.14, (-34.44, 4.16)		112.71, (100.54, 124.88)	110.62, (102.25, 118.99)	137.72, (127.03, 148.41)	132.73, (124.37, 141.09)	139.41, (132.15, 146.67)	148.94, (139.33, 158.55)	152.85, (139.7, 166.0)

## Sheet: Selenium
	Change in Selenium, ug, (95% UI), 16-24	Change in Selenium, ug, (95% UI), 25-34	Change in Selenium, ug, (95% UI), 35-44	Change in Selenium, ug, (95% UI), 45-54	Change in Selenium, ug, (95% UI), 55-64	Change in Selenium, ug, (95% UI), 65-74	Change in Selenium, ug, (95% UI), 75+		Selenium, ug, (95% UI), 16-24	Selenium, ug, (95% UI), 25-34	Selenium, ug, (95% UI), 35-44	Selenium, ug, (95% UI), 45-54	Selenium, ug, (95% UI), 55-64	Selenium, ug, (95% UI), 65-74	Selenium, ug, (95% UI), 75+
Baseline									39.58, (35.26, 43.9)	39.94, (37.18, 42.7)	44.58, (42.06, 47.1)	41.64, (39.44, 43.84)	42.37, (40.37, 44.37)	41.05, (39.05, 43.05)	42.13, (39.34, 44.92)
CCC 2030	-3.05, (-8.99, 2.89)	-3.02, (-6.82, 0.78)	-2.97, (-6.43, 0.49)	-2.63, (-5.7, 0.44)	-2.66, (-5.46, 0.14)	-2.57, (-5.36, 0.22)	-2.52, (-6.43, 1.39)		36.54, (32.46, 40.62)	36.92, (34.31, 39.53)	41.61, (39.24, 43.98)	39.02, (36.87, 41.17)	39.71, (37.76, 41.66)	38.48, (36.53, 40.43)	39.6, (36.87, 42.33)
CCC 2050	-4.77, (-10.62, 1.08)	-4.77, (-8.5, -1.04)	-4.62, (-8.01, -1.23)	-4.06, (-7.11, -1.01)	-4.09, (-6.87, -1.31)	-3.9, (-6.67, -1.13)	-3.81, (-7.71, 0.09)		34.81, (30.86, 38.76)	35.16, (32.64, 37.68)	39.97, (37.7, 42.24)	37.58, (35.46, 39.7)	38.28, (36.35, 40.21)	37.14, (35.22, 39.06)	38.31, (35.59, 41.03)
SDG	-2.3, (-8.23, 3.63)	-1.95, (-5.67, 1.77)	-2.3, (-5.81, 1.21)	-1.99, (-5.13, 1.15)	-2.3, (-5.07, 0.47)	-2.17, (-4.96, 0.62)	-1.81, (-5.74, 2.12)		37.28, (33.21, 41.35)	37.99, (35.5, 40.48)	42.29, (39.84, 44.74)	39.65, (37.4, 41.9)	40.07, (38.15, 41.99)	38.87, (36.92, 40.82)	40.31, (37.54, 43.08)
Max red meat 60g/day	-2.6, (-8.52, 3.32)	-2.26, (-5.96, 1.44)	-2.65, (-6.16, 0.86)	-2.29, (-5.43, 0.85)	-2.6, (-5.37, 0.17)	-2.46, (-5.25, 0.33)	-2.14, (-6.08, 1.8)		36.99, (32.94, 41.04)	37.67, (35.21, 40.13)	41.93, (39.48, 44.38)	39.36, (37.12, 41.6)	39.77, (37.86, 41.68)	38.58, (36.63, 40.53)	39.99, (37.21, 42.77)
Max red meat 31g/day	-3.83, (-9.74, 2.08)	-3.52, (-7.19, 0.15)	-4.08, (-7.59, -0.57)	-3.5, (-6.63, -0.37)	-3.85, (-6.61, -1.09)	-3.71, (-6.51, -0.91)	-3.44, (-7.4, 0.52)		35.75, (31.72, 39.78)	36.41, (33.98, 38.84)	40.51, (38.07, 42.95)	38.14, (35.92, 40.36)	38.52, (36.61, 40.43)	37.33, (35.37, 39.29)	38.69, (35.88, 41.5)
CCC 2030, pulses & legumes	-2.12, (-8.1, 3.86)	-2.14, (-5.96, 1.68)	-2.0, (-5.48, 1.48)	-1.73, (-4.81, 1.35)	-1.71, (-4.51, 1.09)	-1.6, (-4.4, 1.2)	-1.53, (-5.45, 2.39)		37.47, (33.33, 41.61)	37.79, (35.14, 40.44)	42.59, (40.19, 44.99)	39.91, (37.75, 42.07)	40.66, (38.7, 42.62)	39.45, (37.49, 41.41)	40.6, (37.85, 43.35)
CCC 2050, pulses & legumes	-3.47, (-9.37, 2.43)	-3.53, (-7.3, 0.24)	-3.28, (-6.7, 0.14)	-2.84, (-5.9, 0.22)	-2.81, (-5.6, -0.02)	-2.64, (-5.43, 0.15)	-2.53, (-6.44, 1.38)		36.11, (32.08, 40.14)	36.4, (33.83, 38.97)	41.31, (38.99, 43.63)	38.8, (36.67, 40.93)	39.56, (37.62, 41.5)	38.41, (36.47, 40.35)	39.6, (36.86, 42.34)
SDG, pulses & legumes	-1.47, (-7.44, 4.5)	-1.25, (-5.0, 2.5)	-1.4, (-4.92, 2.12)	-1.17, (-4.3, 1.96)	-1.37, (-4.15, 1.41)	-1.24, (-4.04, 1.56)	-0.95, (-4.89, 2.99)		38.11, (33.99, 42.23)	38.69, (36.14, 41.24)	43.18, (40.71, 45.65)	40.47, (38.24, 42.7)	41.0, (39.07, 42.93)	39.8, (37.84, 41.76)	41.18, (38.39, 43.97)
Max red meat 60g/day, pulses & legumes	-1.68, (-7.64, 4.28)	-1.49, (-5.23, 2.25)	-1.66, (-5.18, 1.86)	-1.38, (-4.51, 1.75)	-1.58, (-4.36, 1.2)	-1.46, (-4.26, 1.34)	-1.19, (-5.14, 2.76)		37.9, (33.79, 42.01)	38.45, (35.93, 40.97)	42.92, (40.46, 45.38)	40.26, (38.04, 42.48)	40.79, (38.86, 42.72)	39.58, (37.62, 41.54)	40.94, (38.15, 43.73)
Max red meat 31g/day, pulses & legumes	-2.57, (-8.52, 3.38)	-2.42, (-6.13, 1.29)	-2.7, (-6.21, 0.81)	-2.26, (-5.37, 0.85)	-2.5, (-5.27, 0.27)	-2.4, (-5.2, 0.4)	-2.14, (-6.1, 1.82)		37.02, (32.93, 41.11)	37.51, (35.03, 39.99)	41.89, (39.44, 44.34)	39.38, (37.18, 41.58)	39.87, (37.95, 41.79)	38.65, (36.69, 40.61)	39.99, (37.19, 42.79)
CCC 2030, vegetables	-2.45, (-8.42, 3.52)	-2.47, (-6.28, 1.34)	-2.32, (-5.79, 1.15)	-2.02, (-5.1, 1.06)	-1.99, (-4.79, 0.81)	-1.86, (-4.66, 0.94)	-1.79, (-5.71, 2.13)		37.13, (33.02, 41.24)	37.47, (34.84, 40.1)	42.26, (39.88, 44.64)	39.63, (37.48, 41.78)	40.38, (38.43, 42.33)	39.19, (37.23, 41.15)	40.34, (37.59, 43.09)
CCC 2050, vegetables	-4.05, (-9.93, 1.83)	-4.1, (-7.85, -0.35)	-3.84, (-7.25, -0.43)	-3.34, (-6.4, -0.28)	-3.31, (-6.09, -0.53)	-3.09, (-5.88, -0.3)	-2.98, (-6.89, 0.93)		35.53, (31.54, 39.52)	35.84, (33.3, 38.38)	40.74, (38.45, 43.03)	38.3, (36.18, 40.42)	39.06, (37.13, 40.99)	37.95, (36.01, 39.89)	39.15, (36.41, 41.89)
SDG, vegetables	-1.74, (-7.7, 4.22)	-1.45, (-5.18, 2.28)	-1.68, (-5.2, 1.84)	-1.41, (-4.55, 1.73)	-1.63, (-4.41, 1.15)	-1.47, (-4.27, 1.33)	-1.12, (-5.07, 2.83)		37.84, (33.74, 41.94)	38.48, (35.96, 41.0)	42.91, (40.45, 45.37)	40.24, (38.0, 42.48)	40.74, (38.82, 42.66)	39.57, (37.61, 41.53)	41.01, (38.22, 43.8)
Max red meat 60g/day, vegetables	-2.01, (-7.96, 3.94)	-1.74, (-5.46, 1.98)	-1.99, (-5.51, 1.53)	-1.67, (-4.8, 1.46)	-1.91, (-4.68, 0.86)	-1.74, (-4.54, 1.06)	-1.41, (-5.36, 2.54)		37.58, (33.5, 41.66)	38.19, (35.7, 40.68)	42.59, (40.13, 45.05)	39.97, (37.73, 42.21)	40.46, (38.54, 42.38)	39.31, (37.35, 41.27)	40.71, (37.91, 43.51)
Max red meat 31g/day, vegetables	-3.12, (-9.05, 2.81)	-2.9, (-6.59, 0.79)	-3.29, (-6.8, 0.22)	-2.78, (-5.9, 0.34)	-3.05, (-5.82, -0.28)	-2.88, (-5.69, -0.07)	-2.6, (-6.57, 1.37)		36.46, (32.4, 40.52)	37.04, (34.59, 39.49)	41.29, (38.84, 43.74)	38.87, (36.65, 41.09)	39.32, (37.41, 41.23)	38.16, (36.19, 40.13)	39.53, (36.71, 42.35)
CCC 2030, egg	1.81, (-4.38, 8.0)	1.67, (-2.29, 5.63)	1.83, (-1.8, 5.46)	1.62, (-1.51, 4.75)	1.64, (-1.21, 4.49)	1.46, (-1.37, 4.29)	1.49, (-2.46, 5.44)		41.39, (36.95, 45.83)	41.61, (38.77, 44.45)	46.41, (43.8, 49.02)	43.27, (41.04, 45.5)	44.01, (41.98, 46.04)	42.5, (40.49, 44.51)	43.61, (40.81, 46.41)
CCC 2050, egg	3.41, (-2.86, 9.68)	3.14, (-0.87, 7.15)	3.42, (-0.26, 7.1)	3.03, (-0.11, 6.17)	3.06, (0.18, 5.94)	2.71, (-0.14, 5.56)	2.75, (-1.21, 6.71)		42.99, (38.44, 47.54)	43.07, (40.16, 45.98)	48.0, (45.31, 50.69)	44.67, (42.42, 46.92)	45.43, (43.36, 47.5)	43.75, (41.72, 45.78)	44.88, (42.06, 47.7)
SDG, egg	1.7, (-4.61, 8.01)	1.15, (-2.92, 5.22)	1.82, (-1.85, 5.49)	1.62, (-1.49, 4.73)	1.79, (-1.14, 4.72)	1.48, (-1.41, 4.37)	1.04, (-2.93, 5.01)		41.28, (36.68, 45.88)	41.09, (38.1, 44.08)	46.4, (43.73, 49.07)	43.26, (41.06, 45.46)	44.16, (42.02, 46.3)	42.52, (40.44, 44.6)	43.17, (40.35, 45.99)
Max red meat 60g/day, egg	2.16, (-4.19, 8.51)	1.53, (-2.55, 5.61)	2.3, (-1.38, 5.98)	2.04, (-1.08, 5.16)	2.21, (-0.74, 5.16)	1.82, (-1.07, 4.71)	1.47, (-2.5, 5.44)		41.74, (37.09, 46.39)	41.47, (38.46, 44.48)	46.88, (44.2, 49.56)	43.69, (41.48, 45.9)	44.58, (42.42, 46.74)	42.87, (40.78, 44.96)	43.6, (40.78, 46.42)
Max red meat 31g/day, egg	3.99, (-2.4, 10.38)	3.14, (-0.95, 7.23)	4.31, (0.59, 8.03)	3.8, (0.64, 6.96)	3.97, (0.98, 6.96)	3.36, (0.47, 6.25)	3.28, (-0.7, 7.26)		43.58, (38.87, 48.29)	43.08, (40.06, 46.1)	48.89, (46.15, 51.63)	45.44, (43.17, 47.71)	46.34, (44.12, 48.56)	44.4, (42.31, 46.49)	45.41, (42.58, 48.24)
CCC 2030, non-smoked oily fish	1.51, (-4.66, 7.68)	1.37, (-2.58, 5.32)	1.53, (-2.08, 5.14)	1.36, (-1.76, 4.48)	1.38, (-1.47, 4.23)	1.22, (-1.61, 4.05)	1.25, (-2.7, 5.2)		41.09, (36.68, 45.5)	41.31, (38.49, 44.13)	46.11, (43.52, 48.7)	43.01, (40.79, 45.23)	43.75, (41.72, 45.78)	42.27, (40.27, 44.27)	43.38, (40.59, 46.17)
CCC 2050, non-smoked oily fish	2.87, (-3.37, 9.11)	2.62, (-1.36, 6.6)	2.9, (-0.76, 6.56)	2.57, (-0.57, 5.71)	2.6, (-0.27, 5.47)	2.29, (-0.55, 5.13)	2.34, (-1.62, 6.3)		42.46, (37.96, 46.96)	42.55, (39.67, 45.43)	47.48, (44.82, 50.14)	44.21, (41.97, 46.45)	44.97, (42.91, 47.03)	43.34, (41.32, 45.36)	44.47, (41.67, 47.27)
SDG, non-smoked oily fish	1.45, (-4.82, 7.72)	0.97, (-3.07, 5.01)	1.57, (-2.08, 5.22)	1.4, (-1.7, 4.5)	1.55, (-1.37, 4.47)	1.27, (-1.6, 4.14)	0.89, (-3.07, 4.85)		41.04, (36.49, 45.59)	40.9, (37.95, 43.85)	46.15, (43.51, 48.79)	43.04, (40.85, 45.23)	43.92, (41.8, 46.04)	42.31, (40.25, 44.37)	43.01, (40.2, 45.82)
Max red meat 60g/day, non-smoked oily fish	1.86, (-4.44, 8.16)	1.29, (-2.76, 5.34)	1.99, (-1.67, 5.65)	1.78, (-1.33, 4.89)	1.91, (-1.02, 4.84)	1.57, (-1.31, 4.45)	1.27, (-2.69, 5.23)		41.44, (36.85, 46.03)	41.23, (38.27, 44.19)	46.57, (43.92, 49.22)	43.42, (41.22, 45.62)	44.28, (42.14, 46.42)	42.61, (40.54, 44.68)	43.39, (40.58, 46.2)
Max red meat 31g/day, non-smoked oily fish	3.48, (-2.86, 9.82)	2.71, (-1.34, 6.76)	3.76, (0.07, 7.45)	3.32, (0.18, 6.46)	3.46, (0.49, 6.43)	2.91, (0.04, 5.78)	2.86, (-1.11, 6.83)		43.07, (38.43, 47.71)	42.64, (39.68, 45.6)	48.35, (45.65, 51.05)	44.97, (42.72, 47.22)	45.83, (43.64, 48.02)	43.95, (41.88, 46.02)	44.99, (42.17, 47.81)
CCC 2030, plant-based meat alternatives	-1.9, (-7.89, 4.09)	-1.93, (-5.76, 1.9)	-1.78, (-5.27, 1.71)	-1.54, (-4.62, 1.54)	-1.52, (-4.32, 1.28)	-1.42, (-4.22, 1.38)	-1.36, (-5.28, 2.56)		37.69, (33.54, 41.84)	38.01, (35.35, 40.67)	42.8, (40.39, 45.21)	40.1, (37.94, 42.26)	40.85, (38.89, 42.81)	39.62, (37.66, 41.58)	40.77, (38.01, 43.53)
CCC 2050, plant-based meat alternatives	-3.08, (-9.0, 2.84)	-3.16, (-6.94, 0.62)	-2.9, (-6.34, 0.54)	-2.51, (-5.57, 0.55)	-2.48, (-5.27, 0.31)	-2.34, (-5.13, 0.45)	-2.23, (-6.14, 1.68)		36.5, (32.45, 40.55)	36.78, (34.2, 39.36)	41.69, (39.35, 44.03)	39.13, (37.0, 41.26)	39.89, (37.95, 41.83)	38.71, (36.77, 40.65)	39.9, (37.16, 42.64)
SDG, plant-based meat alternatives	-1.29, (-7.27, 4.69)	-1.11, (-4.88, 2.66)	-1.22, (-4.75, 2.31)	-1.01, (-4.13, 2.11)	-1.19, (-3.98, 1.6)	-1.09, (-3.89, 1.71)	-0.84, (-4.78, 3.1)		38.29, (34.15, 42.43)	38.82, (36.25, 41.39)	43.36, (40.89, 45.83)	40.63, (38.41, 42.85)	41.18, (39.24, 43.12)	39.96, (38.0, 41.92)	41.29, (38.51, 44.07)
Max red meat 60g/day, plant-based meat alternatives	-1.46, (-7.44, 4.52)	-1.32, (-5.07, 2.43)	-1.44, (-4.96, 2.08)	-1.19, (-4.31, 1.93)	-1.37, (-4.15, 1.41)	-1.28, (-4.08, 1.52)	-1.04, (-4.99, 2.91)		38.12, (33.99, 42.25)	38.62, (36.08, 41.16)	43.15, (40.68, 45.62)	40.46, (38.25, 42.67)	41.0, (39.07, 42.93)	39.77, (37.81, 41.73)	41.09, (38.3, 43.88)
Max red meat 31g/day, plant-based meat alternatives	-2.2, (-8.16, 3.76)	-2.11, (-5.83, 1.61)	-2.3, (-5.82, 1.22)	-1.92, (-5.03, 1.19)	-2.14, (-4.92, 0.64)	-2.07, (-4.87, 0.73)	-1.83, (-5.78, 2.12)		37.39, (33.28, 41.5)	37.83, (35.33, 40.33)	42.28, (39.83, 44.73)	39.72, (37.52, 41.92)	40.23, (38.31, 42.15)	38.97, (37.01, 40.93)	40.29, (37.49, 43.09)
SDG, chicken	0.46, (-5.69, 6.61)	0.21, (-3.72, 4.14)	0.56, (-3.03, 4.15)	0.53, (-2.57, 3.63)	0.56, (-2.3, 3.42)	0.41, (-2.42, 3.24)	0.26, (-3.69, 4.21)		40.04, (35.67, 44.41)	40.15, (37.35, 42.95)	45.14, (42.58, 47.7)	42.17, (39.99, 44.35)	42.93, (40.89, 44.97)	41.46, (39.45, 43.47)	42.39, (39.6, 45.18)
Max red meat 60g/day, chicken	0.65, (-5.51, 6.81)	0.35, (-3.58, 4.28)	0.75, (-2.84, 4.34)	0.7, (-2.4, 3.8)	0.72, (-2.14, 3.58)	0.54, (-2.29, 3.37)	0.43, (-3.52, 4.38)		40.24, (35.85, 44.63)	40.28, (37.49, 43.07)	45.33, (42.77, 47.89)	42.35, (40.17, 44.53)	43.09, (41.05, 45.13)	41.58, (39.58, 43.58)	42.56, (39.77, 45.35)
Max red meat 31g/day, chicken	1.43, (-4.73, 7.59)	0.96, (-2.95, 4.87)	1.56, (-2.04, 5.16)	1.42, (-1.68, 4.52)	1.44, (-1.44, 4.32)	1.1, (-1.72, 3.92)	1.16, (-2.78, 5.1)		41.01, (36.61, 45.41)	40.9, (38.13, 43.67)	46.15, (43.58, 48.72)	43.07, (40.88, 45.26)	43.8, (41.74, 45.86)	42.15, (40.16, 44.14)	43.29, (40.51, 46.07)

## Sheet: Zinc
	Change in Zinc, mg, (95% UI), 16-24	Change in Zinc, mg, (95% UI), 25-34	Change in Zinc, mg, (95% UI), 35-44	Change in Zinc, mg, (95% UI), 45-54	Change in Zinc, mg, (95% UI), 55-64	Change in Zinc, mg, (95% UI), 65-74	Change in Zinc, mg, (95% UI), 75+		Zinc, mg, (95% UI), 16-24	Zinc, mg, (95% UI), 25-34	Zinc, mg, (95% UI), 35-44	Zinc, mg, (95% UI), 45-54	Zinc, mg, (95% UI), 55-64	Zinc, mg, (95% UI), 65-74	Zinc, mg, (95% UI), 75+
Baseline									7.75, (6.99, 8.51)	7.37, (7.01, 7.73)	8.28, (7.87, 8.69)	7.69, (7.3, 8.08)	7.62, (7.32, 7.92)	7.72, (7.42, 8.02)	7.53, (7.17, 7.89)
CCC 2030	-0.68, (-1.72, 0.36)	-0.66, (-1.15, -0.17)	-0.78, (-1.34, -0.22)	-0.7, (-1.22, -0.18)	-0.73, (-1.13, -0.33)	-0.73, (-1.13, -0.33)	-0.71, (-1.19, -0.23)		7.07, (6.36, 7.78)	6.7, (6.37, 7.03)	7.51, (7.13, 7.89)	6.99, (6.64, 7.34)	6.9, (6.63, 7.17)	6.98, (6.71, 7.25)	6.82, (6.5, 7.14)
CCC 2050	-0.95, (-1.98, 0.08)	-0.94, (-1.42, -0.46)	-1.09, (-1.64, -0.54)	-0.98, (-1.5, -0.46)	-1.02, (-1.41, -0.63)	-1.02, (-1.42, -0.62)	-0.98, (-1.45, -0.51)		6.8, (6.1, 7.5)	6.43, (6.12, 6.74)	7.19, (6.82, 7.56)	6.71, (6.37, 7.05)	6.6, (6.35, 6.85)	6.69, (6.43, 6.95)	6.55, (6.24, 6.86)
SDG	-0.72, (-1.75, 0.31)	-0.65, (-1.12, -0.18)	-0.82, (-1.37, -0.27)	-0.73, (-1.24, -0.22)	-0.79, (-1.18, -0.4)	-0.79, (-1.18, -0.4)	-0.62, (-1.11, -0.13)		7.02, (6.32, 7.72)	6.72, (6.42, 7.02)	7.46, (7.09, 7.83)	6.96, (6.62, 7.3)	6.83, (6.58, 7.08)	6.93, (6.68, 7.18)	6.91, (6.58, 7.24)
Max red meat 60g/day	-0.81, (-1.83, 0.21)	-0.74, (-1.21, -0.27)	-0.93, (-1.48, -0.38)	-0.83, (-1.34, -0.32)	-0.88, (-1.27, -0.49)	-0.88, (-1.27, -0.49)	-0.72, (-1.2, -0.24)		6.94, (6.26, 7.62)	6.63, (6.33, 6.93)	7.36, (7.0, 7.72)	6.86, (6.53, 7.19)	6.74, (6.49, 6.99)	6.83, (6.58, 7.08)	6.81, (6.49, 7.13)
Max red meat 31g/day	-1.17, (-2.19, -0.15)	-1.1, (-1.56, -0.64)	-1.37, (-1.91, -0.83)	-1.22, (-1.72, -0.72)	-1.29, (-1.67, -0.91)	-1.3, (-1.69, -0.91)	-1.15, (-1.62, -0.68)		6.58, (5.9, 7.26)	6.27, (5.98, 6.56)	6.91, (6.56, 7.26)	6.46, (6.14, 6.78)	6.33, (6.1, 6.56)	6.42, (6.17, 6.67)	6.37, (6.06, 6.68)
CCC 2030, pulses & legumes	-0.45, (-1.5, 0.6)	-0.45, (-0.95, 0.05)	-0.54, (-1.11, 0.03)	-0.48, (-1.01, 0.05)	-0.5, (-0.91, -0.09)	-0.5, (-0.91, -0.09)	-0.47, (-0.96, 0.02)		7.3, (6.57, 8.03)	6.92, (6.58, 7.26)	7.75, (7.36, 8.14)	7.21, (6.85, 7.57)	7.12, (6.85, 7.39)	7.21, (6.93, 7.49)	7.06, (6.73, 7.39)
CCC 2050, pulses & legumes	-0.61, (-1.66, 0.44)	-0.62, (-1.11, -0.13)	-0.75, (-1.31, -0.19)	-0.67, (-1.19, -0.15)	-0.7, (-1.1, -0.3)	-0.71, (-1.11, -0.31)	-0.66, (-1.14, -0.18)		7.14, (6.42, 7.86)	6.75, (6.43, 7.07)	7.54, (7.16, 7.92)	7.02, (6.67, 7.37)	6.92, (6.66, 7.18)	7.01, (6.74, 7.28)	6.86, (6.54, 7.18)
SDG, pulses & legumes	-0.52, (-1.56, 0.52)	-0.49, (-0.97, -0.01)	-0.6, (-1.16, -0.04)	-0.53, (-1.05, -0.01)	-0.57, (-0.97, -0.17)	-0.57, (-0.96, -0.18)	-0.42, (-0.91, 0.07)		7.23, (6.52, 7.94)	6.88, (6.57, 7.19)	7.68, (7.3, 8.06)	7.16, (6.81, 7.51)	7.06, (6.8, 7.32)	7.14, (6.88, 7.4)	7.11, (6.77, 7.45)
Max red meat 60g/day, pulses & legumes	-0.58, (-1.62, 0.46)	-0.55, (-1.03, -0.07)	-0.68, (-1.24, -0.12)	-0.61, (-1.12, -0.1)	-0.64, (-1.04, -0.24)	-0.64, (-1.03, -0.25)	-0.5, (-0.99, -0.01)		7.17, (6.47, 7.87)	6.81, (6.5, 7.12)	7.6, (7.22, 7.98)	7.08, (6.74, 7.42)	6.98, (6.72, 7.24)	7.07, (6.82, 7.32)	7.03, (6.7, 7.36)
Max red meat 31g/day, pulses & legumes	-0.84, (-1.88, 0.2)	-0.82, (-1.29, -0.35)	-1.02, (-1.57, -0.47)	-0.9, (-1.41, -0.39)	-0.95, (-1.34, -0.56)	-0.97, (-1.36, -0.58)	-0.83, (-1.3, -0.36)		6.91, (6.21, 7.61)	6.55, (6.25, 6.85)	7.27, (6.9, 7.64)	6.78, (6.45, 7.11)	6.67, (6.43, 6.91)	6.75, (6.5, 7.0)	6.69, (6.38, 7.0)
CCC 2030, vegetables	-0.53, (-1.58, 0.52)	-0.53, (-1.02, -0.04)	-0.62, (-1.18, -0.06)	-0.55, (-1.08, -0.02)	-0.57, (-0.98, -0.16)	-0.56, (-0.97, -0.15)	-0.53, (-1.02, -0.04)		7.22, (6.5, 7.94)	6.84, (6.51, 7.17)	7.67, (7.28, 8.06)	7.14, (6.78, 7.5)	7.06, (6.79, 7.33)	7.15, (6.88, 7.42)	6.99, (6.66, 7.32)
CCC 2050, vegetables	-0.75, (-1.79, 0.29)	-0.76, (-1.24, -0.28)	-0.89, (-1.45, -0.33)	-0.79, (-1.31, -0.27)	-0.82, (-1.22, -0.42)	-0.82, (-1.22, -0.42)	-0.77, (-1.25, -0.29)		7.0, (6.29, 7.71)	6.61, (6.29, 6.93)	7.4, (7.02, 7.78)	6.9, (6.55, 7.25)	6.8, (6.54, 7.06)	6.9, (6.64, 7.16)	6.76, (6.44, 7.08)
SDG, vegetables	-0.58, (-1.62, 0.46)	-0.54, (-1.02, -0.06)	-0.67, (-1.23, -0.11)	-0.59, (-1.11, -0.07)	-0.63, (-1.03, -0.23)	-0.63, (-1.02, -0.24)	-0.46, (-0.95, 0.03)		7.16, (6.46, 7.86)	6.83, (6.52, 7.14)	7.61, (7.24, 7.98)	7.1, (6.76, 7.44)	6.99, (6.74, 7.24)	7.09, (6.83, 7.35)	7.07, (6.73, 7.41)
Max red meat 60g/day, vegetables	-0.66, (-1.69, 0.37)	-0.62, (-1.09, -0.15)	-0.77, (-1.32, -0.22)	-0.68, (-1.19, -0.17)	-0.71, (-1.1, -0.32)	-0.71, (-1.1, -0.32)	-0.55, (-1.04, -0.06)		7.09, (6.4, 7.78)	6.75, (6.45, 7.05)	7.52, (7.15, 7.89)	7.01, (6.67, 7.35)	6.91, (6.66, 7.16)	7.0, (6.75, 7.25)	6.98, (6.65, 7.31)
Max red meat 31g/day, vegetables	-0.98, (-2.01, 0.05)	-0.94, (-1.41, -0.47)	-1.16, (-1.71, -0.61)	-1.03, (-1.53, -0.53)	-1.08, (-1.46, -0.7)	-1.09, (-1.48, -0.7)	-0.95, (-1.42, -0.48)		6.77, (6.08, 7.46)	6.43, (6.14, 6.72)	7.12, (6.76, 7.48)	6.66, (6.34, 6.98)	6.54, (6.3, 6.78)	6.63, (6.38, 6.88)	6.58, (6.27, 6.89)
CCC 2030, egg	-0.37, (-1.43, 0.69)	-0.38, (-0.88, 0.12)	-0.47, (-1.04, 0.1)	-0.41, (-0.94, 0.12)	-0.43, (-0.84, -0.02)	-0.44, (-0.85, -0.03)	-0.42, (-0.91, 0.07)		7.38, (6.65, 8.11)	6.99, (6.65, 7.33)	7.82, (7.43, 8.21)	7.27, (6.91, 7.63)	7.19, (6.91, 7.47)	7.27, (6.99, 7.55)	7.11, (6.77, 7.45)
CCC 2050, egg	-0.48, (-1.53, 0.57)	-0.5, (-0.99, -0.01)	-0.62, (-1.18, -0.06)	-0.56, (-1.08, -0.04)	-0.59, (-0.99, -0.19)	-0.61, (-1.01, -0.21)	-0.57, (-1.06, -0.08)		7.27, (6.54, 8.0)	6.87, (6.55, 7.19)	7.66, (7.27, 8.05)	7.13, (6.77, 7.49)	7.03, (6.76, 7.3)	7.11, (6.84, 7.38)	6.96, (6.63, 7.29)
SDG, egg	-0.46, (-1.51, 0.59)	-0.44, (-0.92, 0.04)	-0.54, (-1.1, 0.02)	-0.48, (-1.0, 0.04)	-0.51, (-0.91, -0.11)	-0.52, (-0.92, -0.12)	-0.38, (-0.87, 0.11)		7.29, (6.57, 8.01)	6.93, (6.61, 7.25)	7.74, (7.36, 8.12)	7.21, (6.86, 7.56)	7.11, (6.85, 7.37)	7.2, (6.94, 7.46)	7.15, (6.81, 7.49)
Max red meat 60g/day, egg	-0.51, (-1.55, 0.53)	-0.5, (-0.98, -0.02)	-0.61, (-1.17, -0.05)	-0.54, (-1.06, -0.02)	-0.57, (-0.97, -0.17)	-0.58, (-0.97, -0.19)	-0.45, (-0.94, 0.04)		7.24, (6.53, 7.95)	6.87, (6.56, 7.18)	7.67, (7.29, 8.05)	7.14, (6.79, 7.49)	7.06, (6.8, 7.32)	7.13, (6.87, 7.39)	7.08, (6.75, 7.41)
Max red meat 31g/day, egg	-0.72, (-1.76, 0.32)	-0.72, (-1.2, -0.24)	-0.89, (-1.44, -0.34)	-0.79, (-1.3, -0.28)	-0.83, (-1.22, -0.44)	-0.86, (-1.25, -0.47)	-0.73, (-1.21, -0.25)		7.03, (6.32, 7.74)	6.65, (6.34, 6.96)	7.4, (7.03, 7.77)	6.89, (6.55, 7.23)	6.79, (6.54, 7.04)	6.86, (6.61, 7.11)	6.8, (6.48, 7.12)
CCC 2030, non-smoked oily fish	-0.46, (-1.51, 0.59)	-0.47, (-0.96, 0.02)	-0.56, (-1.13, 0.01)	-0.49, (-1.02, 0.04)	-0.51, (-0.92, -0.1)	-0.52, (-0.93, -0.11)	-0.49, (-0.98, -0.0)		7.28, (6.56, 8.0)	6.9, (6.57, 7.23)	7.73, (7.34, 8.12)	7.19, (6.83, 7.55)	7.11, (6.84, 7.38)	7.2, (6.92, 7.48)	7.04, (6.71, 7.37)
CCC 2050, non-smoked oily fish	-0.64, (-1.68, 0.4)	-0.65, (-1.13, -0.17)	-0.78, (-1.34, -0.22)	-0.7, (-1.22, -0.18)	-0.73, (-1.13, -0.33)	-0.73, (-1.13, -0.33)	-0.69, (-1.17, -0.21)		7.1, (6.39, 7.81)	6.71, (6.39, 7.03)	7.5, (7.12, 7.88)	6.99, (6.64, 7.34)	6.89, (6.63, 7.15)	6.98, (6.72, 7.24)	6.84, (6.52, 7.16)
SDG, non-smoked oily fish	-0.53, (-1.57, 0.51)	-0.5, (-0.98, -0.02)	-0.62, (-1.18, -0.06)	-0.54, (-1.06, -0.02)	-0.58, (-0.98, -0.18)	-0.58, (-0.97, -0.19)	-0.43, (-0.92, 0.06)		7.21, (6.5, 7.92)	6.87, (6.56, 7.18)	7.66, (7.28, 8.04)	7.14, (6.79, 7.49)	7.04, (6.78, 7.3)	7.13, (6.87, 7.39)	7.1, (6.76, 7.44)
Max red meat 60g/day, non-smoked oily fish	-0.6, (-1.63, 0.43)	-0.57, (-1.05, -0.09)	-0.7, (-1.26, -0.14)	-0.62, (-1.13, -0.11)	-0.66, (-1.05, -0.27)	-0.66, (-1.05, -0.27)	-0.51, (-1.0, -0.02)		7.15, (6.45, 7.85)	6.8, (6.49, 7.11)	7.58, (7.21, 7.95)	7.06, (6.72, 7.4)	6.97, (6.72, 7.22)	7.05, (6.8, 7.3)	7.02, (6.69, 7.35)
Max red meat 31g/day, non-smoked oily fish	-0.87, (-1.9, 0.16)	-0.85, (-1.32, -0.38)	-1.05, (-1.6, -0.5)	-0.93, (-1.44, -0.42)	-0.98, (-1.37, -0.59)	-1.0, (-1.39, -0.61)	-0.86, (-1.33, -0.39)		6.88, (6.18, 7.58)	6.52, (6.22, 6.82)	7.23, (6.87, 7.59)	6.75, (6.42, 7.08)	6.64, (6.4, 6.88)	6.72, (6.47, 6.97)	6.67, (6.36, 6.98)
CCC 2030, plant-based meat alternatives	-0.01, (-1.09, 1.07)	-0.03, (-0.54, 0.48)	-0.11, (-0.69, 0.47)	-0.1, (-0.64, 0.44)	-0.12, (-0.54, 0.3)	-0.16, (-0.57, 0.25)	-0.14, (-0.64, 0.36)		7.74, (6.98, 8.5)	7.34, (6.99, 7.69)	8.17, (7.77, 8.57)	7.58, (7.21, 7.95)	7.5, (7.21, 7.79)	7.55, (7.26, 7.84)	7.39, (7.04, 7.74)
CCC 2050, plant-based meat alternatives	0.15, (-0.94, 1.24)	0.12, (-0.39, 0.63)	-0.0, (-0.58, 0.58)	-0.02, (-0.56, 0.52)	-0.05, (-0.47, 0.37)	-0.11, (-0.52, 0.3)	-0.08, (-0.59, 0.43)		7.9, (7.12, 8.68)	7.49, (7.14, 7.84)	8.28, (7.87, 8.69)	7.67, (7.3, 8.04)	7.57, (7.28, 7.86)	7.6, (7.32, 7.88)	7.45, (7.09, 7.81)
SDG, plant-based meat alternatives	-0.17, (-1.25, 0.91)	-0.22, (-0.73, 0.29)	-0.25, (-0.83, 0.33)	-0.22, (-0.76, 0.32)	-0.22, (-0.64, 0.2)	-0.27, (-0.68, 0.14)	-0.2, (-0.7, 0.3)		7.58, (6.81, 8.35)	7.15, (6.8, 7.5)	8.04, (7.64, 8.44)	7.47, (7.09, 7.85)	7.41, (7.12, 7.7)	7.45, (7.17, 7.73)	7.33, (6.99, 7.67)
Max red meat 60g/day, plant-based meat alternatives	-0.15, (-1.23, 0.93)	-0.22, (-0.73, 0.29)	-0.25, (-0.83, 0.33)	-0.23, (-0.77, 0.31)	-0.22, (-0.64, 0.2)	-0.28, (-0.69, 0.13)	-0.2, (-0.69, 0.29)		7.59, (6.82, 8.36)	7.15, (6.8, 7.5)	8.04, (7.64, 8.44)	7.46, (7.08, 7.84)	7.41, (7.12, 7.7)	7.43, (7.15, 7.71)	7.33, (6.99, 7.67)
Max red meat 31g/day, plant-based meat alternatives	-0.11, (-1.2, 0.98)	-0.2, (-0.71, 0.31)	-0.24, (-0.82, 0.34)	-0.23, (-0.77, 0.31)	-0.23, (-0.65, 0.19)	-0.33, (-0.74, 0.08)	-0.23, (-0.73, 0.27)		7.63, (6.84, 8.42)	7.16, (6.81, 7.51)	8.04, (7.63, 8.45)	7.45, (7.07, 7.83)	7.39, (7.1, 7.68)	7.39, (7.11, 7.67)	7.3, (6.96, 7.64)
SDG, chicken	-0.52, (-1.56, 0.52)	-0.49, (-0.97, -0.01)	-0.6, (-1.16, -0.04)	-0.53, (-1.05, -0.01)	-0.56, (-0.96, -0.16)	-0.57, (-0.96, -0.18)	-0.42, (-0.91, 0.07)		7.23, (6.52, 7.94)	6.88, (6.57, 7.19)	7.68, (7.3, 8.06)	7.16, (6.81, 7.51)	7.06, (6.8, 7.32)	7.15, (6.89, 7.41)	7.11, (6.77, 7.45)
Max red meat 60g/day, chicken	-0.58, (-1.62, 0.46)	-0.55, (-1.03, -0.07)	-0.68, (-1.24, -0.12)	-0.6, (-1.11, -0.09)	-0.63, (-1.03, -0.23)	-0.64, (-1.03, -0.25)	-0.5, (-0.99, -0.01)		7.17, (6.47, 7.87)	6.82, (6.51, 7.13)	7.6, (7.22, 7.98)	7.08, (6.74, 7.42)	6.99, (6.73, 7.25)	7.07, (6.82, 7.32)	7.03, (6.7, 7.36)
Max red meat 31g/day, chicken	-0.84, (-1.88, 0.2)	-0.82, (-1.29, -0.35)	-1.01, (-1.56, -0.46)	-0.9, (-1.41, -0.39)	-0.94, (-1.33, -0.55)	-0.96, (-1.35, -0.57)	-0.83, (-1.3, -0.36)		6.91, (6.21, 7.61)	6.55, (6.25, 6.85)	7.27, (6.9, 7.64)	6.78, (6.45, 7.11)	6.68, (6.44, 6.92)	6.75, (6.5, 7.0)	6.7, (6.39, 7.01)

## Sheet: Vitamin B12
	Change in Vitamin B12, ug, (95% UI), 16-24	Change in Vitamin B12, ug, (95% UI), 25-34	Change in Vitamin B12, ug, (95% UI), 35-44	Change in Vitamin B12, ug, (95% UI), 45-54	Change in Vitamin B12, ug, (95% UI), 55-64	Change in Vitamin B12, ug, (95% UI), 65-74	Change in Vitamin B12, ug, (95% UI), 75+		Vitamin B12, ug, (95% UI), 16-24	Vitamin B12, ug, (95% UI), 25-34	Vitamin B12, ug, (95% UI), 35-44	Vitamin B12, ug, (95% UI), 45-54	Vitamin B12, ug, (95% UI), 55-64	Vitamin B12, ug, (95% UI), 65-74	Vitamin B12, ug, (95% UI), 75+
Baseline									3.96, (3.45, 4.47)	4.25, (3.48, 5.02)	4.52, (4.2, 4.84)	4.31, (4.03, 4.59)	4.57, (4.32, 4.82)	4.99, (4.65, 5.33)	5.25, (4.77, 5.73)
CCC 2030	-0.51, (-1.2, 0.18)	-0.53, (-1.55, 0.49)	-0.57, (-1.0, -0.14)	-0.54, (-0.92, -0.16)	-0.57, (-0.91, -0.23)	-0.65, (-1.1, -0.2)	-0.64, (-1.29, 0.01)		3.45, (2.98, 3.92)	3.72, (3.05, 4.39)	3.95, (3.66, 4.24)	3.76, (3.5, 4.02)	3.99, (3.76, 4.22)	4.34, (4.05, 4.63)	4.6, (4.17, 5.03)
CCC 2050	-0.62, (-1.31, 0.07)	-0.69, (-1.67, 0.29)	-0.7, (-1.13, -0.27)	-0.66, (-1.04, -0.28)	-0.7, (-1.03, -0.37)	-0.8, (-1.23, -0.37)	-0.79, (-1.42, -0.16)		3.34, (2.88, 3.8)	3.56, (2.96, 4.16)	3.82, (3.53, 4.11)	3.65, (3.39, 3.91)	3.87, (3.65, 4.09)	4.19, (3.92, 4.46)	4.46, (4.05, 4.87)
SDG	-0.54, (-1.22, 0.14)	-0.55, (-1.56, 0.46)	-0.61, (-1.04, -0.18)	-0.58, (-0.96, -0.2)	-0.62, (-0.95, -0.29)	-0.67, (-1.13, -0.21)	-0.63, (-1.26, 0.0)		3.42, (2.97, 3.87)	3.7, (3.05, 4.35)	3.91, (3.62, 4.2)	3.72, (3.46, 3.98)	3.94, (3.72, 4.16)	4.32, (4.02, 4.62)	4.62, (4.21, 5.03)
Max red meat 60g/day	-0.58, (-1.26, 0.1)	-0.63, (-1.61, 0.35)	-0.66, (-1.09, -0.23)	-0.62, (-1.0, -0.24)	-0.67, (-1.0, -0.34)	-0.73, (-1.18, -0.28)	-0.69, (-1.32, -0.06)		3.38, (2.93, 3.83)	3.62, (3.02, 4.22)	3.86, (3.57, 4.15)	3.68, (3.42, 3.94)	3.9, (3.68, 4.12)	4.27, (3.98, 4.56)	4.56, (4.16, 4.96)
Max red meat 31g/day	-0.76, (-1.44, -0.08)	-0.89, (-1.8, 0.02)	-0.85, (-1.28, -0.42)	-0.79, (-1.17, -0.41)	-0.85, (-1.18, -0.52)	-0.98, (-1.41, -0.55)	-0.91, (-1.53, -0.29)		3.2, (2.75, 3.65)	3.36, (2.88, 3.84)	3.67, (3.38, 3.96)	3.52, (3.27, 3.77)	3.71, (3.5, 3.92)	4.01, (3.75, 4.27)	4.33, (3.94, 4.72)
CCC 2030, pulses & legumes	-0.43, (-1.13, 0.27)	-0.45, (-1.47, 0.57)	-0.48, (-0.91, -0.05)	-0.45, (-0.84, -0.06)	-0.47, (-0.81, -0.13)	-0.54, (-0.99, -0.09)	-0.52, (-1.17, 0.13)		3.53, (3.06, 4.0)	3.8, (3.13, 4.47)	4.05, (3.76, 4.34)	3.86, (3.6, 4.12)	4.1, (3.87, 4.33)	4.45, (4.16, 4.74)	4.72, (4.28, 5.16)
CCC 2050, pulses & legumes	-0.53, (-1.22, 0.16)	-0.6, (-1.58, 0.38)	-0.6, (-1.03, -0.17)	-0.56, (-0.94, -0.18)	-0.59, (-0.93, -0.25)	-0.69, (-1.13, -0.25)	-0.66, (-1.3, -0.02)		3.42, (2.95, 3.89)	3.65, (3.05, 4.25)	3.92, (3.63, 4.21)	3.75, (3.49, 4.01)	3.98, (3.76, 4.2)	4.3, (4.03, 4.57)	4.58, (4.16, 5.0)
SDG, pulses & legumes	-0.46, (-1.15, 0.23)	-0.47, (-1.48, 0.54)	-0.52, (-0.95, -0.09)	-0.49, (-0.87, -0.11)	-0.52, (-0.86, -0.18)	-0.56, (-1.02, -0.1)	-0.51, (-1.15, 0.13)		3.5, (3.04, 3.96)	3.78, (3.13, 4.43)	4.01, (3.72, 4.3)	3.82, (3.56, 4.08)	4.05, (3.83, 4.27)	4.43, (4.12, 4.74)	4.74, (4.33, 5.15)
Max red meat 60g/day, pulses & legumes	-0.5, (-1.18, 0.18)	-0.55, (-1.53, 0.43)	-0.56, (-0.99, -0.13)	-0.53, (-0.91, -0.15)	-0.56, (-0.89, -0.23)	-0.61, (-1.06, -0.16)	-0.57, (-1.2, 0.06)		3.46, (3.0, 3.92)	3.7, (3.1, 4.3)	3.96, (3.67, 4.25)	3.78, (3.52, 4.04)	4.0, (3.78, 4.22)	4.38, (4.08, 4.68)	4.68, (4.27, 5.09)
Max red meat 31g/day, pulses & legumes	-0.67, (-1.35, 0.01)	-0.81, (-1.72, 0.1)	-0.75, (-1.18, -0.32)	-0.69, (-1.07, -0.31)	-0.75, (-1.08, -0.42)	-0.87, (-1.3, -0.44)	-0.79, (-1.42, -0.16)		3.28, (2.82, 3.74)	3.44, (2.96, 3.92)	3.77, (3.48, 4.06)	3.62, (3.37, 3.87)	3.82, (3.61, 4.03)	4.12, (3.86, 4.38)	4.46, (4.06, 4.86)
CCC 2030, vegetables	-0.43, (-1.12, 0.26)	-0.45, (-1.47, 0.57)	-0.48, (-0.91, -0.05)	-0.45, (-0.84, -0.06)	-0.47, (-0.81, -0.13)	-0.54, (-0.99, -0.09)	-0.53, (-1.18, 0.12)		3.53, (3.06, 4.0)	3.8, (3.13, 4.47)	4.04, (3.75, 4.33)	3.86, (3.6, 4.12)	4.09, (3.86, 4.32)	4.45, (4.16, 4.74)	4.72, (4.28, 5.16)
CCC 2050, vegetables	-0.54, (-1.23, 0.15)	-0.61, (-1.59, 0.37)	-0.61, (-1.04, -0.18)	-0.57, (-0.95, -0.19)	-0.6, (-0.94, -0.26)	-0.69, (-1.13, -0.25)	-0.67, (-1.31, -0.03)		3.41, (2.94, 3.88)	3.64, (3.04, 4.24)	3.92, (3.63, 4.21)	3.74, (3.48, 4.0)	3.97, (3.75, 4.19)	4.3, (4.03, 4.57)	4.57, (4.15, 4.99)
SDG, vegetables	-0.46, (-1.15, 0.23)	-0.48, (-1.49, 0.53)	-0.52, (-0.95, -0.09)	-0.49, (-0.87, -0.11)	-0.52, (-0.86, -0.18)	-0.56, (-1.02, -0.1)	-0.51, (-1.15, 0.13)		3.49, (3.03, 3.95)	3.77, (3.12, 4.42)	4.0, (3.71, 4.29)	3.82, (3.56, 4.08)	4.04, (3.82, 4.26)	4.43, (4.12, 4.74)	4.73, (4.32, 5.14)
Max red meat 60g/day, vegetables	-0.51, (-1.19, 0.17)	-0.55, (-1.53, 0.43)	-0.57, (-1.0, -0.14)	-0.53, (-0.91, -0.15)	-0.57, (-0.9, -0.24)	-0.62, (-1.07, -0.17)	-0.57, (-1.2, 0.06)		3.45, (2.99, 3.91)	3.7, (3.1, 4.3)	3.96, (3.67, 4.25)	3.77, (3.51, 4.03)	4.0, (3.78, 4.22)	4.37, (4.07, 4.67)	4.67, (4.26, 5.08)
Max red meat 31g/day, vegetables	-0.68, (-1.36, 0.0)	-0.82, (-1.73, 0.09)	-0.76, (-1.19, -0.33)	-0.7, (-1.08, -0.32)	-0.75, (-1.08, -0.42)	-0.87, (-1.3, -0.44)	-0.8, (-1.43, -0.17)		3.27, (2.82, 3.72)	3.43, (2.95, 3.91)	3.76, (3.47, 4.05)	3.61, (3.36, 3.86)	3.81, (3.6, 4.02)	4.12, (3.86, 4.38)	4.45, (4.05, 4.85)
CCC 2030, egg	0.01, (-0.7, 0.72)	-0.03, (-1.06, 1.0)	-0.05, (-0.49, 0.39)	-0.08, (-0.47, 0.31)	-0.1, (-0.44, 0.24)	-0.2, (-0.65, 0.25)	-0.19, (-0.84, 0.46)		3.96, (3.46, 4.46)	4.22, (3.54, 4.9)	4.47, (4.16, 4.78)	4.23, (3.96, 4.5)	4.47, (4.24, 4.7)	4.79, (4.5, 5.08)	5.06, (4.63, 5.49)
CCC 2050, egg	0.22, (-0.5, 0.94)	0.13, (-0.86, 1.12)	0.14, (-0.31, 0.59)	0.09, (-0.3, 0.48)	0.06, (-0.28, 0.4)	-0.1, (-0.54, 0.34)	-0.08, (-0.71, 0.55)		4.18, (3.67, 4.69)	4.38, (3.76, 5.0)	4.66, (4.35, 4.97)	4.4, (4.13, 4.67)	4.62, (4.39, 4.85)	4.89, (4.62, 5.16)	5.16, (4.75, 5.57)
SDG, egg	-0.11, (-0.84, 0.62)	-0.21, (-1.24, 0.82)	-0.16, (-0.61, 0.29)	-0.18, (-0.57, 0.21)	-0.17, (-0.52, 0.18)	-0.26, (-0.72, 0.2)	-0.29, (-0.93, 0.35)		3.85, (3.32, 4.38)	4.04, (3.36, 4.72)	4.36, (4.05, 4.67)	4.13, (3.87, 4.39)	4.4, (4.16, 4.64)	4.73, (4.42, 5.04)	4.96, (4.54, 5.38)
Max red meat 60g/day, egg	-0.08, (-0.82, 0.66)	-0.22, (-1.22, 0.78)	-0.12, (-0.57, 0.33)	-0.15, (-0.54, 0.24)	-0.14, (-0.49, 0.21)	-0.25, (-0.7, 0.2)	-0.27, (-0.9, 0.36)		3.88, (3.35, 4.41)	4.03, (3.39, 4.67)	4.4, (4.09, 4.71)	4.16, (3.89, 4.43)	4.42, (4.18, 4.66)	4.74, (4.44, 5.04)	4.97, (4.56, 5.38)
Max red meat 31g/day, egg	0.05, (-0.7, 0.8)	-0.19, (-1.13, 0.75)	0.02, (-0.43, 0.47)	-0.02, (-0.41, 0.37)	-0.03, (-0.37, 0.31)	-0.23, (-0.66, 0.2)	-0.19, (-0.81, 0.43)		4.01, (3.46, 4.56)	4.06, (3.53, 4.59)	4.55, (4.24, 4.86)	4.29, (4.02, 4.56)	4.54, (4.31, 4.77)	4.76, (4.5, 5.02)	5.05, (4.66, 5.44)
CCC 2030, non-smoked oily fish	0.38, (-0.35, 1.11)	0.33, (-0.71, 1.37)	0.31, (-0.14, 0.76)	0.24, (-0.15, 0.63)	0.22, (-0.13, 0.57)	0.09, (-0.36, 0.54)	0.1, (-0.55, 0.75)		4.34, (3.82, 4.86)	4.58, (3.89, 5.27)	4.83, (4.51, 5.15)	4.55, (4.28, 4.82)	4.79, (4.55, 5.03)	5.08, (4.78, 5.38)	5.34, (4.9, 5.78)
CCC 2050, non-smoked oily fish	0.88, (0.12, 1.64)	0.77, (-0.24, 1.78)	0.78, (0.31, 1.25)	0.65, (0.25, 1.05)	0.61, (0.26, 0.96)	0.41, (-0.03, 0.85)	0.42, (-0.22, 1.06)		4.83, (4.26, 5.4)	5.02, (4.37, 5.67)	5.3, (4.96, 5.64)	4.95, (4.67, 5.23)	5.18, (4.94, 5.42)	5.4, (5.12, 5.68)	5.67, (5.25, 6.09)
SDG, non-smoked oily fish	0.19, (-0.6, 0.98)	0.02, (-1.04, 1.08)	0.14, (-0.33, 0.61)	0.08, (-0.32, 0.48)	0.13, (-0.24, 0.5)	0.0, (-0.47, 0.47)	-0.1, (-0.74, 0.54)		4.15, (3.54, 4.76)	4.27, (3.55, 4.99)	4.67, (4.33, 5.01)	4.39, (4.11, 4.67)	4.7, (4.43, 4.97)	4.99, (4.67, 5.31)	5.15, (4.72, 5.58)
Max red meat 60g/day, non-smoked oily fish	0.29, (-0.51, 1.09)	0.07, (-0.96, 1.1)	0.25, (-0.22, 0.72)	0.18, (-0.23, 0.59)	0.22, (-0.15, 0.59)	0.06, (-0.4, 0.52)	-0.02, (-0.66, 0.62)		4.24, (3.62, 4.86)	4.32, (3.63, 5.01)	4.77, (4.42, 5.12)	4.48, (4.19, 4.77)	4.78, (4.51, 5.05)	5.05, (4.73, 5.37)	5.22, (4.8, 5.64)
Max red meat 31g/day, non-smoked oily fish	0.67, (-0.17, 1.51)	0.33, (-0.65, 1.31)	0.69, (0.2, 1.18)	0.55, (0.13, 0.97)	0.58, (0.2, 0.96)	0.32, (-0.13, 0.77)	0.32, (-0.32, 0.96)		4.63, (3.97, 5.29)	4.58, (3.98, 5.18)	5.21, (4.84, 5.58)	4.86, (4.55, 5.17)	5.15, (4.87, 5.43)	5.31, (5.02, 5.6)	5.57, (5.15, 5.99)
CCC 2030, plant-based meat alternatives	-0.39, (-1.09, 0.31)	-0.42, (-1.44, 0.6)	-0.44, (-0.88, -0.0)	-0.42, (-0.81, -0.03)	-0.44, (-0.78, -0.1)	-0.51, (-0.96, -0.06)	-0.5, (-1.15, 0.15)		3.56, (3.09, 4.03)	3.83, (3.16, 4.5)	4.08, (3.79, 4.37)	3.89, (3.63, 4.15)	4.13, (3.9, 4.36)	4.48, (4.19, 4.77)	4.75, (4.31, 5.19)
CCC 2050, plant-based meat alternatives	-0.48, (-1.17, 0.21)	-0.55, (-1.53, 0.43)	-0.54, (-0.97, -0.11)	-0.51, (-0.89, -0.13)	-0.54, (-0.88, -0.2)	-0.64, (-1.08, -0.2)	-0.62, (-1.26, 0.02)		3.48, (3.01, 3.95)	3.7, (3.1, 4.3)	3.98, (3.69, 4.27)	3.8, (3.54, 4.06)	4.03, (3.81, 4.25)	4.35, (4.08, 4.62)	4.63, (4.21, 5.05)
SDG, plant-based meat alternatives	-0.43, (-1.12, 0.26)	-0.45, (-1.46, 0.56)	-0.49, (-0.92, -0.06)	-0.46, (-0.84, -0.08)	-0.49, (-0.83, -0.15)	-0.53, (-0.99, -0.07)	-0.49, (-1.13, 0.15)		3.52, (3.06, 3.98)	3.8, (3.15, 4.45)	4.03, (3.74, 4.32)	3.84, (3.58, 4.1)	4.07, (3.85, 4.29)	4.46, (4.16, 4.76)	4.75, (4.34, 5.16)
Max red meat 60g/day, plant-based meat alternatives	-0.47, (-1.16, 0.22)	-0.52, (-1.5, 0.46)	-0.53, (-0.96, -0.1)	-0.5, (-0.88, -0.12)	-0.53, (-0.86, -0.2)	-0.59, (-1.04, -0.14)	-0.55, (-1.18, 0.08)		3.49, (3.03, 3.95)	3.73, (3.13, 4.33)	3.99, (3.7, 4.28)	3.81, (3.55, 4.07)	4.04, (3.82, 4.26)	4.41, (4.11, 4.71)	4.7, (4.29, 5.11)
Max red meat 31g/day, plant-based meat alternatives	-0.62, (-1.31, 0.07)	-0.76, (-1.67, 0.15)	-0.69, (-1.12, -0.26)	-0.64, (-1.02, -0.26)	-0.69, (-1.02, -0.36)	-0.82, (-1.25, -0.39)	-0.74, (-1.36, -0.12)		3.34, (2.88, 3.8)	3.49, (3.01, 3.97)	3.83, (3.54, 4.12)	3.67, (3.42, 3.92)	3.88, (3.67, 4.09)	4.17, (3.91, 4.43)	4.5, (4.1, 4.9)
SDG, chicken	-0.46, (-1.15, 0.23)	-0.48, (-1.49, 0.53)	-0.52, (-0.95, -0.09)	-0.49, (-0.87, -0.11)	-0.52, (-0.86, -0.18)	-0.56, (-1.02, -0.1)	-0.51, (-1.15, 0.13)		3.49, (3.03, 3.95)	3.77, (3.12, 4.42)	4.0, (3.71, 4.29)	3.82, (3.56, 4.08)	4.04, (3.82, 4.26)	4.43, (4.12, 4.74)	4.73, (4.32, 5.14)
Max red meat 60g/day, chicken	-0.51, (-1.19, 0.17)	-0.55, (-1.53, 0.43)	-0.57, (-1.0, -0.14)	-0.53, (-0.91, -0.15)	-0.57, (-0.9, -0.24)	-0.62, (-1.07, -0.17)	-0.57, (-1.2, 0.06)		3.45, (2.99, 3.91)	3.7, (3.1, 4.3)	3.96, (3.67, 4.25)	3.77, (3.51, 4.03)	4.0, (3.78, 4.22)	4.37, (4.07, 4.67)	4.67, (4.26, 5.08)
Max red meat 31g/day, chicken	-0.68, (-1.36, 0.0)	-0.82, (-1.73, 0.09)	-0.76, (-1.19, -0.33)	-0.7, (-1.08, -0.32)	-0.75, (-1.08, -0.42)	-0.87, (-1.3, -0.44)	-0.8, (-1.43, -0.17)		3.27, (2.82, 3.72)	3.43, (2.95, 3.91)	3.76, (3.47, 4.05)	3.61, (3.36, 3.86)	3.81, (3.6, 4.02)	4.12, (3.86, 4.38)	4.45, (4.05, 4.85)

## Sheet: Fat
	Change in Fat, g, (95% UI), 16-24	Change in Fat, g, (95% UI), 25-34	Change in Fat, g, (95% UI), 35-44	Change in Fat, g, (95% UI), 45-54	Change in Fat, g, (95% UI), 55-64	Change in Fat, g, (95% UI), 65-74	Change in Fat, g, (95% UI), 75+		Fat, g, (95% UI), 16-24	Fat, g, (95% UI), 25-34	Fat, g, (95% UI), 35-44	Fat, g, (95% UI), 45-54	Fat, g, (95% UI), 55-64	Fat, g, (95% UI), 65-74	Fat, g, (95% UI), 75+
Baseline									61.58, (55.54, 67.62)	61.08, (57.91, 64.25)	69.34, (66.27, 72.41)	61.43, (58.74, 64.12)	63.26, (60.38, 66.14)	60.26, (57.68, 62.84)	58.77, (55.53, 62.01)
CCC 2030	-4.83, (-13.08, 3.42)	-4.66, (-8.99, -0.33)	-5.37, (-9.56, -1.18)	-4.89, (-8.53, -1.25)	-5.21, (-9.09, -1.33)	-5.01, (-8.52, -1.5)	-5.16, (-9.58, -0.74)		56.75, (51.14, 62.36)	56.42, (53.46, 59.38)	63.97, (61.13, 66.81)	56.53, (54.08, 58.98)	58.05, (55.45, 60.65)	55.25, (52.87, 57.63)	53.61, (50.6, 56.62)
CCC 2050	-6.12, (-14.32, 2.08)	-5.81, (-10.12, -1.5)	-6.62, (-10.78, -2.46)	-5.96, (-9.58, -2.34)	-6.34, (-10.19, -2.49)	-5.91, (-9.4, -2.42)	-6.06, (-10.49, -1.63)		55.46, (49.92, 61.0)	55.27, (52.35, 58.19)	62.71, (59.9, 65.52)	55.46, (53.04, 57.88)	56.92, (54.37, 59.47)	54.35, (51.99, 56.71)	52.71, (49.68, 55.74)
SDG	-5.09, (-13.22, 3.04)	-4.47, (-8.78, -0.16)	-5.65, (-9.81, -1.49)	-5.12, (-8.76, -1.48)	-5.5, (-9.35, -1.65)	-5.22, (-8.7, -1.74)	-4.94, (-9.33, -0.55)		56.49, (51.04, 61.94)	56.61, (53.69, 59.53)	63.69, (60.89, 66.49)	56.31, (53.86, 58.76)	57.75, (55.19, 60.31)	55.04, (52.7, 57.38)	53.83, (50.87, 56.79)
Max red meat 60g/day	-5.57, (-13.68, 2.54)	-4.84, (-9.12, -0.56)	-6.1, (-10.25, -1.95)	-5.47, (-9.1, -1.84)	-5.86, (-9.7, -2.02)	-5.5, (-8.97, -2.03)	-5.27, (-9.66, -0.88)		56.01, (50.6, 61.42)	56.23, (53.35, 59.11)	63.24, (60.45, 66.03)	55.96, (53.52, 58.4)	57.39, (54.85, 59.93)	54.76, (52.43, 57.09)	53.51, (50.54, 56.48)
Max red meat 31g/day	-7.4, (-15.48, 0.68)	-6.36, (-10.61, -2.11)	-7.99, (-12.15, -3.83)	-6.97, (-10.58, -3.36)	-7.36, (-11.17, -3.55)	-6.71, (-10.18, -3.24)	-6.67, (-11.12, -2.22)		54.18, (48.82, 59.54)	54.72, (51.89, 57.55)	61.34, (58.54, 64.14)	54.46, (52.06, 56.86)	55.89, (53.4, 58.38)	53.55, (51.24, 55.86)	52.1, (49.05, 55.15)
CCC 2030, pulses & legumes	-2.5, (-10.86, 5.86)	-2.21, (-6.6, 2.18)	-2.63, (-6.89, 1.63)	-2.28, (-5.98, 1.42)	-2.55, (-6.46, 1.36)	-2.32, (-5.87, 1.23)	-2.37, (-6.86, 2.12)		59.08, (53.3, 64.86)	58.87, (55.83, 61.91)	66.71, (63.75, 69.67)	59.14, (56.59, 61.69)	60.7, (58.06, 63.34)	57.94, (55.5, 60.38)	56.4, (53.29, 59.51)
CCC 2050, pulses & legumes	-2.93, (-11.26, 5.4)	-2.52, (-6.89, 1.85)	-3.05, (-7.3, 1.2)	-2.62, (-6.31, 1.07)	-2.95, (-6.83, 0.93)	-2.54, (-6.09, 1.01)	-2.61, (-7.11, 1.89)		58.65, (52.91, 64.39)	58.56, (55.55, 61.57)	66.29, (63.35, 69.23)	58.81, (56.28, 61.34)	60.31, (57.7, 62.92)	57.71, (55.28, 60.14)	56.16, (53.03, 59.29)
SDG, pulses & legumes	-2.99, (-11.28, 5.3)	-2.43, (-6.8, 1.94)	-3.09, (-7.33, 1.15)	-2.67, (-6.37, 1.03)	-2.91, (-6.81, 0.99)	-2.62, (-6.15, 0.91)	-2.45, (-6.91, 2.01)		58.59, (52.92, 64.26)	58.65, (55.64, 61.66)	66.25, (63.33, 69.17)	58.75, (56.21, 61.29)	60.35, (57.72, 62.98)	57.64, (55.23, 60.05)	56.32, (53.25, 59.39)
Max red meat 60g/day, pulses & legumes	-3.27, (-11.54, 5.0)	-2.62, (-6.97, 1.73)	-3.32, (-7.55, 0.91)	-2.84, (-6.54, 0.86)	-3.08, (-6.97, 0.81)	-2.74, (-6.27, 0.79)	-2.58, (-7.04, 1.88)		58.31, (52.66, 63.96)	58.46, (55.47, 61.45)	66.01, (63.1, 68.92)	58.59, (56.05, 61.13)	60.18, (57.56, 62.8)	57.52, (55.11, 59.93)	56.19, (53.12, 59.26)
Max red meat 31g/day, pulses & legumes	-4.31, (-12.56, 3.94)	-3.39, (-7.72, 0.94)	-4.33, (-8.57, -0.09)	-3.57, (-7.25, 0.11)	-3.8, (-7.67, 0.07)	-3.23, (-6.75, 0.29)	-3.18, (-7.67, 1.31)		57.27, (51.65, 62.89)	57.68, (54.73, 60.63)	65.01, (62.09, 67.93)	57.86, (55.34, 60.38)	59.46, (56.88, 62.04)	57.03, (54.64, 59.42)	55.59, (52.48, 58.7)
CCC 2030, vegetables	-3.56, (-11.89, 4.77)	-3.23, (-7.6, 1.14)	-3.66, (-7.9, 0.58)	-3.19, (-6.88, 0.5)	-3.46, (-7.35, 0.43)	-3.14, (-6.68, 0.4)	-3.19, (-7.68, 1.3)		58.02, (52.29, 63.75)	57.84, (54.82, 60.86)	65.68, (62.76, 68.6)	58.24, (55.71, 60.77)	59.8, (57.18, 62.42)	57.12, (54.69, 59.55)	55.58, (52.47, 58.69)
CCC 2050, vegetables	-4.79, (-13.07, 3.49)	-4.32, (-8.67, 0.03)	-4.85, (-9.07, -0.63)	-4.2, (-7.87, -0.53)	-4.53, (-8.39, -0.67)	-3.99, (-7.51, -0.47)	-4.04, (-8.55, 0.47)		56.8, (51.13, 62.47)	56.76, (53.77, 59.75)	64.48, (61.59, 67.37)	57.23, (54.73, 59.73)	58.73, (56.15, 61.31)	56.27, (53.87, 58.67)	54.73, (51.6, 57.86)
SDG, vegetables	-3.85, (-12.07, 4.37)	-3.08, (-7.43, 1.27)	-3.96, (-8.17, 0.25)	-3.42, (-7.11, 0.27)	-3.76, (-7.63, 0.11)	-3.36, (-6.87, 0.15)	-2.99, (-7.45, 1.47)		57.73, (52.16, 63.3)	58.0, (55.02, 60.98)	65.38, (62.5, 68.26)	58.0, (55.47, 60.53)	59.5, (56.92, 62.08)	56.9, (54.52, 59.28)	55.78, (52.72, 58.84)
Max red meat 60g/day, vegetables	-4.3, (-12.49, 3.89)	-3.43, (-7.76, 0.9)	-4.39, (-8.6, -0.18)	-3.76, (-7.44, -0.08)	-4.1, (-7.96, -0.24)	-3.63, (-7.13, -0.13)	-3.3, (-7.76, 1.16)		57.28, (51.75, 62.81)	57.64, (54.69, 60.59)	64.95, (62.08, 67.82)	57.66, (55.14, 60.18)	59.15, (56.59, 61.71)	56.63, (54.26, 59.0)	55.47, (52.4, 58.54)
Max red meat 31g/day, vegetables	-6.08, (-14.24, 2.08)	-4.89, (-9.18, -0.6)	-6.22, (-10.43, -2.01)	-5.2, (-8.86, -1.54)	-5.54, (-9.37, -1.71)	-4.78, (-8.27, -1.29)	-4.64, (-9.16, -0.12)		55.5, (50.01, 60.99)	56.18, (53.28, 59.08)	63.12, (60.24, 66.0)	56.23, (53.75, 58.71)	57.71, (55.19, 60.23)	55.48, (53.12, 57.84)	54.13, (50.98, 57.28)
CCC 2030, egg	-1.16, (-9.56, 7.24)	-0.9, (-5.31, 3.51)	-1.32, (-5.61, 2.97)	-1.13, (-4.85, 2.59)	-1.41, (-5.34, 2.52)	-1.27, (-4.84, 2.3)	-1.34, (-5.83, 3.15)		60.42, (54.58, 66.26)	60.17, (57.11, 63.23)	68.02, (65.02, 71.02)	60.29, (57.72, 62.86)	61.85, (59.18, 64.52)	58.99, (56.52, 61.46)	57.43, (54.31, 60.55)
CCC 2050, egg	-0.58, (-8.99, 7.83)	-0.24, (-4.65, 4.17)	-0.76, (-5.07, 3.55)	-0.61, (-4.33, 3.11)	-0.94, (-4.86, 2.98)	-0.72, (-4.3, 2.86)	-0.81, (-5.32, 3.7)		61.0, (55.15, 66.85)	60.84, (57.78, 63.9)	68.58, (65.56, 71.6)	60.82, (58.24, 63.4)	62.32, (59.66, 64.98)	59.54, (57.06, 62.02)	57.96, (54.82, 61.1)
SDG, egg	-1.91, (-10.31, 6.49)	-1.61, (-6.02, 2.8)	-1.99, (-6.27, 2.29)	-1.72, (-5.45, 2.01)	-1.83, (-5.79, 2.13)	-1.69, (-5.26, 1.88)	-1.77, (-6.24, 2.7)		59.67, (53.84, 65.5)	59.47, (56.4, 62.54)	67.35, (64.36, 70.34)	59.71, (57.12, 62.3)	61.43, (58.72, 64.14)	58.57, (56.1, 61.04)	57.0, (53.92, 60.08)
Max red meat 60g/day, egg	-1.96, (-10.35, 6.43)	-1.59, (-6.0, 2.82)	-1.97, (-6.26, 2.32)	-1.67, (-5.41, 2.07)	-1.78, (-5.73, 2.17)	-1.62, (-5.19, 1.95)	-1.67, (-6.14, 2.8)		59.62, (53.8, 65.44)	59.49, (56.43, 62.55)	67.37, (64.38, 70.36)	59.76, (57.17, 62.35)	61.47, (58.76, 64.18)	58.64, (56.17, 61.11)	57.1, (54.02, 60.18)
Max red meat 31g/day, egg	-2.06, (-10.45, 6.33)	-1.49, (-5.89, 2.91)	-1.93, (-6.23, 2.37)	-1.49, (-5.24, 2.26)	-1.59, (-5.53, 2.35)	-1.26, (-4.83, 2.31)	-1.32, (-5.8, 3.16)		59.52, (53.69, 65.35)	59.59, (56.53, 62.65)	67.4, (64.39, 70.41)	59.93, (57.32, 62.54)	61.67, (58.98, 64.36)	59.0, (56.53, 61.47)	57.45, (54.35, 60.55)
CCC 2030, non-smoked oily fish	-0.86, (-9.27, 7.55)	-0.62, (-5.03, 3.79)	-1.03, (-5.33, 3.27)	-0.88, (-4.61, 2.85)	-1.16, (-5.09, 2.77)	-1.04, (-4.62, 2.54)	-1.12, (-5.62, 3.38)		60.72, (54.87, 66.57)	60.46, (57.39, 63.53)	68.3, (65.29, 71.31)	60.54, (57.96, 63.12)	62.1, (59.42, 64.78)	59.22, (56.74, 61.7)	57.65, (54.53, 60.77)
CCC 2050, non-smoked oily fish	-0.06, (-8.48, 8.36)	0.26, (-4.16, 4.68)	-0.26, (-4.58, 4.06)	-0.17, (-3.9, 3.56)	-0.5, (-4.43, 3.43)	-0.32, (-3.91, 3.27)	-0.41, (-4.92, 4.1)		61.52, (55.65, 67.39)	61.34, (58.26, 64.42)	69.08, (66.04, 72.12)	61.26, (58.67, 63.85)	62.75, (60.08, 65.42)	59.94, (57.45, 62.43)	58.36, (55.22, 61.5)
SDG, non-smoked oily fish	-1.67, (-10.09, 6.75)	-1.43, (-5.85, 2.99)	-1.75, (-6.05, 2.55)	-1.51, (-5.25, 2.23)	-1.59, (-5.56, 2.38)	-1.49, (-5.08, 2.1)	-1.62, (-6.09, 2.85)		59.91, (54.04, 65.78)	59.65, (56.56, 62.74)	67.59, (64.59, 70.59)	59.92, (57.32, 62.52)	61.67, (58.94, 64.4)	58.77, (56.28, 61.26)	57.15, (54.06, 60.24)
Max red meat 60g/day, non-smoked oily fish	-1.67, (-10.09, 6.75)	-1.36, (-5.78, 3.06)	-1.67, (-5.97, 2.63)	-1.41, (-5.16, 2.34)	-1.5, (-5.47, 2.47)	-1.37, (-4.96, 2.22)	-1.47, (-5.94, 3.0)		59.91, (54.04, 65.78)	59.71, (56.63, 62.79)	67.66, (64.65, 70.67)	60.02, (57.41, 62.63)	61.76, (59.03, 64.49)	58.89, (56.4, 61.38)	57.3, (54.21, 60.39)
Max red meat 31g/day, non-smoked oily fish	-1.57, (-10.0, 6.86)	-1.07, (-5.49, 3.35)	-1.41, (-5.73, 2.91)	-1.04, (-4.8, 2.72)	-1.1, (-5.06, 2.86)	-0.83, (-4.42, 2.76)	-0.92, (-5.4, 3.56)		60.01, (54.13, 65.89)	60.0, (56.92, 63.08)	67.93, (64.9, 70.96)	60.39, (57.76, 63.02)	62.16, (59.44, 64.88)	59.43, (56.94, 61.92)	57.86, (54.76, 60.96)
CCC 2030, plant-based meat alternatives	-2.4, (-10.76, 5.96)	-2.1, (-6.49, 2.29)	-2.52, (-6.79, 1.75)	-2.19, (-5.9, 1.52)	-2.46, (-6.37, 1.45)	-2.23, (-5.79, 1.33)	-2.29, (-6.78, 2.2)		59.18, (53.4, 64.96)	58.97, (55.93, 62.01)	66.81, (63.85, 69.77)	59.24, (56.69, 61.79)	60.79, (58.15, 63.43)	58.02, (55.57, 60.47)	56.48, (53.37, 59.59)
CCC 2050, plant-based meat alternatives	-2.74, (-11.08, 5.6)	-2.34, (-6.71, 2.03)	-2.87, (-7.13, 1.39)	-2.46, (-6.15, 1.23)	-2.79, (-6.68, 1.1)	-2.4, (-5.95, 1.15)	-2.47, (-6.97, 2.03)		58.84, (53.09, 64.59)	58.74, (55.72, 61.76)	66.47, (63.52, 69.42)	58.97, (56.44, 61.5)	60.47, (57.86, 63.08)	57.86, (55.42, 60.3)	56.3, (53.17, 59.43)
SDG, plant-based meat alternatives	-2.91, (-11.2, 5.38)	-2.36, (-6.73, 2.01)	-3.0, (-7.24, 1.24)	-2.6, (-6.3, 1.1)	-2.82, (-6.73, 1.09)	-2.55, (-6.08, 0.98)	-2.4, (-6.86, 2.06)		58.68, (53.0, 64.36)	58.71, (55.69, 61.73)	66.34, (63.42, 69.26)	58.83, (56.28, 61.38)	60.44, (57.8, 63.08)	57.71, (55.29, 60.13)	56.38, (53.31, 59.45)
Max red meat 60g/day, plant-based meat alternatives	-3.17, (-11.45, 5.11)	-2.54, (-6.9, 1.82)	-3.21, (-7.45, 1.03)	-2.75, (-6.45, 0.95)	-2.98, (-6.88, 0.92)	-2.65, (-6.18, 0.88)	-2.51, (-6.97, 1.95)		58.42, (52.76, 64.08)	58.54, (55.55, 61.53)	66.12, (63.2, 69.04)	58.68, (56.14, 61.22)	60.28, (57.65, 62.91)	57.61, (55.2, 60.02)	56.26, (53.19, 59.33)
Max red meat 31g/day, plant-based meat alternatives	-4.13, (-12.39, 4.13)	-3.24, (-7.57, 1.09)	-4.14, (-8.38, 0.1)	-3.4, (-7.09, 0.29)	-3.62, (-7.49, 0.25)	-3.07, (-6.59, 0.45)	-3.03, (-7.52, 1.46)		57.45, (51.82, 63.08)	57.83, (54.87, 60.79)	65.2, (62.28, 68.12)	58.02, (55.49, 60.55)	59.63, (57.04, 62.22)	57.19, (54.79, 59.59)	55.74, (52.63, 58.85)
SDG, chicken	-3.6, (-11.83, 4.63)	-2.89, (-7.25, 1.47)	-3.7, (-7.92, 0.52)	-3.2, (-6.89, 0.49)	-3.51, (-7.39, 0.37)	-3.14, (-6.65, 0.37)	-2.83, (-7.29, 1.63)		57.98, (52.38, 63.58)	58.19, (55.2, 61.18)	65.63, (62.74, 68.52)	58.22, (55.69, 60.75)	59.75, (57.15, 62.35)	57.12, (54.73, 59.51)	55.94, (52.88, 59.0)
Max red meat 60g/day, chicken	-4.0, (-12.21, 4.21)	-3.2, (-7.53, 1.13)	-4.08, (-8.29, 0.13)	-3.49, (-7.18, 0.2)	-3.81, (-7.67, 0.05)	-3.37, (-6.88, 0.14)	-3.09, (-7.55, 1.37)		57.58, (52.02, 63.14)	57.88, (54.92, 60.84)	65.26, (62.38, 68.14)	57.93, (55.41, 60.45)	59.45, (56.87, 62.03)	56.89, (54.51, 59.27)	55.68, (52.61, 58.75)
Max red meat 31g/day, chicken	-5.56, (-13.74, 2.62)	-4.46, (-8.76, -0.16)	-5.67, (-9.89, -1.45)	-4.72, (-8.38, -1.06)	-5.04, (-8.88, -1.2)	-4.33, (-7.83, -0.83)	-4.21, (-8.72, 0.3)		56.02, (50.5, 61.54)	56.62, (53.71, 59.53)	63.67, (60.78, 66.56)	56.7, (54.21, 59.19)	58.22, (55.68, 60.76)	55.93, (53.56, 58.3)	54.56, (51.42, 57.7)

## Sheet: Carbohydrate
	Change in Carbohydrate, g, (95% UI), 16-24	Change in Carbohydrate, g, (95% UI), 25-34	Change in Carbohydrate, g, (95% UI), 35-44	Change in Carbohydrate, g, (95% UI), 45-54	Change in Carbohydrate, g, (95% UI), 55-64	Change in Carbohydrate, g, (95% UI), 65-74	Change in Carbohydrate, g, (95% UI), 75+		Carbohydrate, g, (95% UI), 16-24	Carbohydrate, g, (95% UI), 25-34	Carbohydrate, g, (95% UI), 35-44	Carbohydrate, g, (95% UI), 45-54	Carbohydrate, g, (95% UI), 55-64	Carbohydrate, g, (95% UI), 65-74	Carbohydrate, g, (95% UI), 75+
Baseline									208.74, (186.59, 230.89)	205.27, (195.09, 215.45)	219.22, (210.16, 228.28)	198.73, (190.05, 207.41)	193.06, (186.27, 199.85)	183.84, (177.31, 190.37)	189.42, (180.54, 198.3)
CCC 2030	-2.3, (-33.57, 28.97)	-2.03, (-16.39, 12.33)	-2.5, (-15.27, 10.27)	-2.28, (-14.52, 9.96)	-2.51, (-12.07, 7.05)	-2.65, (-11.83, 6.53)	-2.75, (-15.19, 9.69)		206.45, (184.37, 228.53)	203.24, (193.12, 213.36)	216.72, (207.72, 225.72)	196.45, (187.83, 205.07)	190.55, (183.83, 197.27)	181.19, (174.74, 187.64)	186.67, (177.96, 195.38)
CCC 2050	-2.54, (-33.83, 28.75)	-2.21, (-16.56, 12.14)	-2.7, (-15.47, 10.07)	-2.44, (-14.67, 9.79)	-2.68, (-12.23, 6.87)	-2.78, (-11.96, 6.4)	-2.89, (-15.33, 9.55)		206.21, (184.11, 228.31)	203.07, (192.95, 213.19)	216.53, (207.53, 225.53)	196.29, (187.68, 204.9)	190.38, (183.66, 197.1)	181.07, (174.62, 187.52)	186.53, (177.81, 195.25)
SDG	-2.33, (-33.56, 28.9)	-2.02, (-16.37, 12.33)	-2.62, (-15.39, 10.15)	-2.37, (-14.6, 9.86)	-2.62, (-12.17, 6.93)	-2.72, (-11.9, 6.46)	-2.75, (-15.19, 9.69)		206.41, (184.39, 228.43)	203.25, (193.13, 213.37)	216.6, (207.6, 225.6)	196.36, (187.75, 204.97)	190.44, (183.73, 197.15)	181.12, (174.67, 187.57)	186.67, (177.96, 195.38)
Max red meat 60g/day	-2.43, (-33.67, 28.81)	-2.09, (-16.44, 12.26)	-2.7, (-15.47, 10.07)	-2.42, (-14.64, 9.8)	-2.69, (-12.24, 6.86)	-2.77, (-11.95, 6.41)	-2.81, (-15.25, 9.63)		206.31, (184.28, 228.34)	203.19, (193.08, 213.3)	216.52, (207.52, 225.52)	196.31, (187.7, 204.92)	190.37, (183.66, 197.08)	181.08, (174.63, 187.53)	186.61, (177.9, 195.32)
Max red meat 31g/day	-2.83, (-34.1, 28.44)	-2.37, (-16.71, 11.97)	-3.02, (-15.79, 9.75)	-2.66, (-14.88, 9.56)	-2.97, (-12.51, 6.57)	-2.95, (-12.12, 6.22)	-3.05, (-15.5, 9.4)		205.91, (183.84, 227.98)	202.9, (192.8, 213.0)	216.2, (207.2, 225.2)	196.07, (187.48, 204.66)	190.09, (183.39, 196.79)	180.9, (174.45, 187.35)	186.37, (177.64, 195.1)
CCC 2030, pulses & legumes	1.52, (-29.88, 32.92)	1.5, (-12.88, 15.88)	1.43, (-11.41, 14.27)	1.3, (-10.99, 13.59)	1.22, (-8.4, 10.84)	1.08, (-8.14, 10.3)	1.01, (-11.51, 13.53)		210.26, (188.0, 232.52)	206.77, (196.62, 216.92)	220.65, (211.56, 229.74)	200.03, (191.33, 208.73)	194.28, (187.46, 201.1)	184.92, (178.41, 191.43)	190.44, (181.62, 199.26)
CCC 2050, pulses & legumes	3.12, (-28.36, 34.6)	3.1, (-11.28, 17.48)	3.02, (-9.84, 15.88)	2.72, (-9.58, 15.02)	2.61, (-7.04, 12.26)	2.38, (-6.84, 11.6)	2.29, (-10.23, 14.81)		211.86, (189.49, 234.23)	208.38, (198.23, 218.53)	222.24, (213.11, 231.37)	201.44, (192.72, 210.16)	195.67, (188.82, 202.52)	186.23, (179.72, 192.74)	191.71, (182.89, 200.53)
SDG, pulses & legumes	1.01, (-30.47, 32.49)	0.63, (-13.75, 15.01)	0.93, (-11.93, 13.79)	0.87, (-11.44, 13.18)	0.98, (-8.71, 10.67)	0.8, (-8.44, 10.04)	0.38, (-12.14, 12.9)		209.76, (187.4, 232.12)	205.91, (195.76, 216.06)	220.15, (211.03, 229.27)	199.6, (190.88, 208.32)	194.04, (187.13, 200.95)	184.64, (178.1, 191.18)	189.8, (180.97, 198.63)
Max red meat 60g/day, pulses & legumes	1.33, (-30.19, 32.85)	0.95, (-13.43, 15.33)	1.31, (-11.57, 14.19)	1.21, (-11.1, 13.52)	1.3, (-8.4, 11.0)	1.11, (-8.14, 10.36)	0.74, (-11.78, 13.26)		210.07, (187.65, 232.49)	206.22, (196.06, 216.38)	220.53, (211.38, 229.68)	199.94, (191.21, 208.67)	194.36, (187.44, 201.28)	184.95, (178.4, 191.5)	190.16, (181.34, 198.98)
Max red meat 31g/day, pulses & legumes	2.62, (-28.98, 34.22)	2.25, (-12.15, 16.65)	2.89, (-10.05, 15.83)	2.61, (-9.74, 14.96)	2.7, (-7.02, 12.42)	2.47, (-6.78, 11.72)	2.22, (-10.29, 14.73)		211.37, (188.83, 233.91)	207.52, (197.34, 217.7)	222.11, (212.87, 231.35)	201.34, (192.56, 210.12)	195.76, (188.81, 202.71)	186.31, (179.76, 192.86)	191.64, (182.82, 200.46)
CCC 2030, vegetables	-0.07, (-31.42, 31.28)	-0.04, (-14.42, 14.34)	-0.12, (-12.94, 12.7)	-0.05, (-12.32, 12.22)	-0.14, (-9.74, 9.46)	-0.15, (-9.37, 9.07)	-0.2, (-12.72, 12.32)		208.68, (186.49, 230.87)	205.24, (195.09, 215.39)	219.1, (210.04, 228.16)	198.68, (190.01, 207.35)	192.92, (186.14, 199.7)	183.69, (177.19, 190.19)	189.22, (180.39, 198.05)
CCC 2050, vegetables	0.34, (-31.04, 31.72)	0.41, (-13.96, 14.78)	0.32, (-12.51, 13.15)	0.35, (-11.92, 12.62)	0.24, (-9.36, 9.84)	0.22, (-8.99, 9.43)	0.16, (-12.36, 12.68)		209.09, (186.86, 231.32)	205.69, (195.54, 215.84)	219.54, (210.46, 228.62)	199.08, (190.41, 207.75)	193.3, (186.51, 200.09)	184.07, (177.57, 190.57)	189.58, (180.75, 198.41)
SDG, vegetables	-0.27, (-31.62, 31.08)	-0.34, (-14.71, 14.03)	-0.37, (-13.19, 12.45)	-0.26, (-12.53, 12.01)	-0.3, (-9.91, 9.31)	-0.3, (-9.52, 8.92)	-0.43, (-12.95, 12.09)		208.48, (186.3, 230.66)	204.94, (194.8, 215.08)	218.85, (209.78, 227.92)	198.47, (189.8, 207.14)	192.76, (185.96, 199.56)	183.55, (177.04, 190.06)	188.99, (180.16, 197.82)
Max red meat 60g/day, vegetables	-0.22, (-31.58, 31.14)	-0.27, (-14.64, 14.1)	-0.29, (-13.12, 12.54)	-0.17, (-12.44, 12.1)	-0.23, (-9.84, 9.38)	-0.22, (-9.44, 9.0)	-0.34, (-12.86, 12.18)		208.52, (186.32, 230.72)	205.0, (194.86, 215.14)	218.94, (209.86, 228.02)	198.56, (189.89, 207.23)	192.83, (186.02, 199.64)	183.63, (177.12, 190.14)	189.08, (180.25, 197.91)
Max red meat 31g/day, vegetables	-0.03, (-31.44, 31.38)	0.01, (-14.36, 14.38)	0.06, (-12.79, 12.91)	0.17, (-12.1, 12.44)	0.09, (-9.53, 9.71)	0.15, (-9.07, 9.37)	0.03, (-12.49, 12.55)		208.72, (186.45, 230.99)	205.28, (195.14, 215.42)	219.29, (210.18, 228.4)	198.9, (190.22, 207.58)	193.15, (186.34, 199.96)	183.99, (177.48, 190.5)	189.45, (180.62, 198.28)
CCC 2030, egg	-0.89, (-32.21, 30.43)	-0.84, (-15.22, 13.54)	-0.92, (-13.73, 11.89)	-0.75, (-13.01, 11.51)	-0.84, (-10.42, 8.74)	-0.79, (-10.0, 8.42)	-0.84, (-13.37, 11.69)		207.85, (185.7, 230.0)	204.44, (194.29, 214.59)	218.3, (209.25, 227.35)	197.98, (189.33, 206.63)	192.22, (185.46, 198.98)	183.05, (176.55, 189.55)	188.59, (179.76, 197.42)
CCC 2050, egg	-1.1, (-32.43, 30.23)	-0.99, (-15.37, 13.39)	-1.09, (-13.9, 11.72)	-0.89, (-13.14, 11.36)	-0.99, (-10.57, 8.59)	-0.9, (-10.11, 8.31)	-0.95, (-13.48, 11.58)		207.64, (185.47, 229.81)	204.29, (194.14, 214.44)	218.14, (209.09, 227.19)	197.84, (189.19, 206.49)	192.07, (185.31, 198.83)	182.95, (176.45, 189.45)	188.47, (179.63, 197.31)
SDG, egg	-0.93, (-32.21, 30.35)	-0.84, (-15.21, 13.53)	-1.05, (-13.86, 11.76)	-0.84, (-13.09, 11.41)	-0.96, (-10.54, 8.62)	-0.87, (-10.08, 8.34)	-0.85, (-13.37, 11.67)		207.81, (185.72, 229.9)	204.43, (194.29, 214.57)	218.18, (209.13, 227.23)	197.89, (189.25, 206.53)	192.1, (185.35, 198.85)	182.97, (176.47, 189.47)	188.57, (179.74, 197.4)
Max red meat 60g/day, egg	-1.03, (-32.32, 30.26)	-0.9, (-15.27, 13.47)	-1.12, (-13.93, 11.69)	-0.89, (-13.14, 11.36)	-1.02, (-10.6, 8.56)	-0.91, (-10.12, 8.3)	-0.9, (-13.42, 11.62)		207.72, (185.62, 229.82)	204.37, (194.23, 214.51)	218.11, (209.06, 227.16)	197.84, (189.2, 206.48)	192.04, (185.29, 198.79)	182.94, (176.44, 189.44)	188.53, (179.7, 197.36)
Max red meat 31g/day, egg	-1.4, (-32.72, 29.92)	-1.16, (-15.52, 13.2)	-1.41, (-14.22, 11.4)	-1.1, (-13.34, 11.14)	-1.27, (-10.84, 8.3)	-1.06, (-10.27, 8.15)	-1.11, (-13.64, 11.42)		207.34, (185.2, 229.48)	204.11, (193.98, 214.24)	217.81, (208.76, 226.86)	197.63, (189.0, 206.26)	191.79, (185.05, 198.53)	182.78, (176.28, 189.28)	188.31, (179.46, 197.16)
CCC 2030, non-smoked oily fish	-0.65, (-31.98, 30.68)	-0.6, (-14.98, 13.78)	-0.68, (-13.49, 12.13)	-0.55, (-12.81, 11.71)	-0.63, (-10.22, 8.96)	-0.61, (-9.83, 8.61)	-0.65, (-13.17, 11.87)		208.1, (185.94, 230.26)	204.67, (194.52, 214.82)	218.54, (209.49, 227.59)	198.18, (189.52, 206.84)	192.43, (185.66, 199.2)	183.24, (176.74, 189.74)	188.77, (179.94, 197.6)
CCC 2050, non-smoked oily fish	-0.68, (-32.03, 30.67)	-0.57, (-14.95, 13.81)	-0.67, (-13.48, 12.14)	-0.52, (-12.78, 11.74)	-0.62, (-10.21, 8.97)	-0.57, (-9.78, 8.64)	-0.62, (-13.15, 11.91)		208.07, (185.88, 230.26)	204.7, (194.55, 214.85)	218.55, (209.49, 227.61)	198.21, (189.56, 206.86)	192.44, (185.67, 199.21)	183.28, (176.78, 189.78)	188.8, (179.97, 197.63)
SDG, non-smoked oily fish	-0.74, (-32.04, 30.56)	-0.69, (-15.06, 13.68)	-0.85, (-13.66, 11.96)	-0.67, (-12.92, 11.58)	-0.76, (-10.35, 8.83)	-0.7, (-9.92, 8.52)	-0.72, (-13.24, 11.8)		208.01, (185.89, 230.13)	204.58, (194.44, 214.72)	218.38, (209.32, 227.44)	198.06, (189.41, 206.71)	192.3, (185.53, 199.07)	183.14, (176.64, 189.64)	188.7, (179.87, 197.53)
Max red meat 60g/day, non-smoked oily fish	-0.79, (-32.1, 30.52)	-0.71, (-15.08, 13.66)	-0.87, (-13.68, 11.94)	-0.68, (-12.93, 11.57)	-0.79, (-10.38, 8.8)	-0.7, (-9.92, 8.52)	-0.73, (-13.25, 11.79)		207.95, (185.82, 230.08)	204.56, (194.42, 214.7)	218.35, (209.29, 227.41)	198.05, (189.4, 206.7)	192.27, (185.5, 199.04)	183.14, (176.64, 189.64)	188.69, (179.86, 197.52)
Max red meat 31g/day, non-smoked oily fish	-1.0, (-32.35, 30.35)	-0.82, (-15.19, 13.55)	-0.97, (-13.79, 11.85)	-0.73, (-12.98, 11.52)	-0.87, (-10.45, 8.71)	-0.71, (-9.92, 8.5)	-0.77, (-13.3, 11.76)		207.75, (185.57, 229.93)	204.46, (194.33, 214.59)	218.25, (209.18, 227.32)	198.0, (189.36, 206.64)	192.19, (185.43, 198.95)	183.14, (176.64, 189.64)	188.65, (179.81, 197.49)
CCC 2030, plant-based meat alternatives	0.49, (-30.88, 31.86)	0.5, (-13.88, 14.88)	0.42, (-12.4, 13.24)	0.43, (-11.84, 12.7)	0.34, (-9.27, 9.95)	0.28, (-8.94, 9.5)	0.23, (-12.29, 12.75)		209.24, (187.03, 231.45)	205.78, (195.63, 215.93)	219.65, (210.58, 228.72)	199.16, (190.48, 207.84)	193.4, (186.61, 200.19)	184.13, (177.63, 190.63)	189.65, (180.82, 198.48)
CCC 2050, plant-based meat alternatives	1.32, (-30.1, 32.74)	1.36, (-13.02, 15.74)	1.27, (-11.57, 14.11)	1.18, (-11.1, 13.46)	1.08, (-8.54, 10.7)	0.98, (-8.24, 10.2)	0.91, (-11.61, 13.43)		210.06, (187.78, 232.34)	206.63, (196.48, 216.78)	220.49, (211.4, 229.58)	199.91, (191.22, 208.6)	194.14, (187.33, 200.95)	184.83, (178.33, 191.33)	190.33, (181.5, 199.16)
SDG, plant-based meat alternatives	0.18, (-31.21, 31.57)	0.01, (-14.36, 14.38)	0.09, (-12.75, 12.93)	0.14, (-12.14, 12.42)	0.15, (-9.49, 9.79)	0.09, (-9.14, 9.32)	-0.14, (-12.66, 12.38)		208.93, (186.69, 231.17)	205.28, (195.13, 215.43)	219.31, (210.22, 228.4)	198.87, (190.18, 207.56)	193.21, (186.37, 200.05)	183.93, (177.41, 190.45)	189.28, (180.45, 198.11)
Max red meat 60g/day, plant-based meat alternatives	0.32, (-31.1, 31.74)	0.16, (-14.21, 14.53)	0.27, (-12.58, 13.12)	0.32, (-11.96, 12.6)	0.31, (-9.33, 9.95)	0.25, (-8.98, 9.48)	0.04, (-12.48, 12.56)		209.07, (186.79, 231.35)	205.43, (195.28, 215.58)	219.5, (210.4, 228.6)	199.05, (190.36, 207.74)	193.37, (186.53, 200.21)	184.09, (177.57, 190.61)	189.46, (180.64, 198.28)
Max red meat 31g/day, plant-based meat alternatives	0.91, (-30.57, 32.39)	0.8, (-13.58, 15.18)	1.06, (-11.82, 13.94)	1.03, (-11.27, 13.33)	1.01, (-8.64, 10.66)	0.96, (-8.27, 10.19)	0.8, (-11.72, 13.32)		209.65, (187.28, 232.02)	206.07, (195.92, 216.22)	220.28, (211.13, 229.43)	199.76, (191.05, 208.47)	194.07, (187.21, 200.93)	184.81, (178.29, 191.33)	190.22, (181.4, 199.04)
SDG, chicken	-0.96, (-32.24, 30.32)	-0.86, (-15.23, 13.51)	-1.08, (-13.89, 11.73)	-0.87, (-13.12, 11.38)	-0.99, (-10.57, 8.59)	-0.9, (-10.11, 8.31)	-0.87, (-13.39, 11.65)		207.78, (185.69, 229.87)	204.41, (194.27, 214.55)	218.14, (209.09, 227.19)	197.86, (189.22, 206.5)	192.07, (185.32, 198.82)	182.95, (176.45, 189.45)	188.56, (179.73, 197.39)
Max red meat 60g/day, chicken	-1.07, (-32.35, 30.21)	-0.93, (-15.3, 13.44)	-1.16, (-13.97, 11.65)	-0.92, (-13.17, 11.33)	-1.06, (-10.63, 8.51)	-0.94, (-10.15, 8.27)	-0.92, (-13.44, 11.6)		207.68, (185.59, 229.77)	204.34, (194.2, 214.48)	218.07, (209.02, 227.12)	197.81, (189.17, 206.45)	192.0, (185.25, 198.75)	182.91, (176.41, 189.41)	188.5, (179.67, 197.33)
Max red meat 31g/day, chicken	-1.47, (-32.78, 29.84)	-1.22, (-15.58, 13.14)	-1.48, (-14.29, 11.33)	-1.16, (-13.4, 11.08)	-1.33, (-10.9, 8.24)	-1.12, (-10.33, 8.09)	-1.16, (-13.7, 11.38)		207.28, (185.14, 229.42)	204.06, (193.93, 214.19)	217.75, (208.7, 226.8)	197.57, (188.94, 206.2)	191.73, (184.99, 198.47)	182.73, (176.24, 189.22)	188.26, (179.41, 197.11)

[truncated: 52 more sheets: Free Sugars, Sodium, Haem Iron, Non-haem Iron, Thiamin, Saturated fatty acids, Trans fatty acids, Cis monounsaturated fatty acids, n-6 fatty acids, n-3 fatty acids, Vitamin D, Vitamin A, Riboflavin, Potassium, Vitamin B6, Cholesterol, Magnesium, Phosphorus, Copper, Choloride …]
