# Supplementary material for: Impact of reducing meat and dairy consumption on nutrient intake, health, cost of diets and the environment: A simulation among adults in Scotland
Source: Research Square preprint supplement (doi:10.21203/rs.3.rs-5820769/v1), 2025-02-04
Supplement: Supplementary file 4 [file 63e71f644ccf158a684206ac.xlsx]

## Sheet: Energy
	Change in Energy, kcal, (95% UI), SIMD 1 (most deprived)	Change in Energy, kcal, (95% UI), SIMD 2	Change in Energy, kcal, (95% UI), SIMD 3	Change in Energy, kcal, (95% UI), SIMD 4	Change in Energy, kcal, (95% UI), SIMD 5 (least deprived)		Energy, kcal, (95% UI), SIMD 1 (most deprived)	Energy, kcal, (95% UI), SIMD 2	Energy, kcal, (95% UI), SIMD 3	Energy, kcal, (95% UI), SIMD 4	Energy, kcal, (95% UI), SIMD 5 (least deprived)
Baseline							1565.99, (1479.61, 1652.37)	1628.83, (1576.59, 1681.07)	1632.36, (1572.53, 1692.19)	1592.96, (1534.65, 1651.27)	1717.31, (1654.14, 1780.48)
CCC 2030	-78.53, (-198.27, 41.21)	-80.62, (-152.96, -8.28)	-85.47, (-167.86, -3.08)	-80.1, (-160.96, 0.76)	-82.62, (-170.46, 5.22)		1487.46, (1404.53, 1570.39)	1548.2, (1498.16, 1598.24)	1546.89, (1490.25, 1603.53)	1512.86, (1456.84, 1568.88)	1634.7, (1573.67, 1695.73)
CCC 2050	-103.24, (-222.0, 15.52)	-102.98, (-175.11, -30.85)	-109.24, (-191.03, -27.45)	-103.44, (-183.95, -22.93)	-103.68, (-190.9, -16.46)		1462.75, (1381.24, 1544.26)	1525.85, (1476.12, 1575.58)	1523.12, (1467.35, 1578.89)	1489.52, (1434.01, 1545.03)	1613.64, (1553.51, 1673.77)
SDG	-80.52, (-199.48, 38.44)	-76.84, (-148.72, -4.96)	-82.38, (-164.16, -0.6)	-74.51, (-154.14, 5.12)	-77.91, (-165.06, 9.24)		1485.47, (1403.68, 1567.26)	1551.99, (1502.62, 1601.36)	1549.98, (1494.23, 1605.73)	1518.44, (1464.2, 1572.68)	1639.4, (1579.36, 1699.44)
Max red meat 60g/day	-87.63, (-206.38, 31.12)	-83.15, (-154.98, -11.32)	-89.09, (-170.61, -7.57)	-81.0, (-160.38, -1.62)	-83.27, (-170.24, 3.7)		1478.36, (1396.86, 1559.86)	1545.68, (1496.38, 1594.98)	1543.27, (1487.9, 1598.64)	1511.96, (1458.09, 1565.83)	1634.05, (1574.28, 1693.82)
Max red meat 31g/day	-115.7, (-234.06, 2.66)	-108.27, (-179.99, -36.55)	-116.59, (-197.68, -35.5)	-108.68, (-187.75, -29.61)	-106.97, (-193.75, -20.19)		1450.29, (1369.37, 1531.21)	1520.56, (1471.43, 1569.69)	1515.77, (1461.04, 1570.5)	1484.28, (1430.87, 1537.69)	1610.35, (1550.85, 1669.85)
CCC 2030, pulses & legumes	-35.15, (-156.55, 86.25)	-36.49, (-109.51, 36.53)	-40.38, (-123.59, 42.83)	-37.06, (-118.44, 44.32)	-39.57, (-128.18, 49.04)		1530.84, (1445.53, 1616.15)	1592.34, (1541.32, 1643.36)	1591.98, (1534.15, 1649.81)	1555.9, (1499.14, 1612.66)	1677.74, (1615.61, 1739.87)
CCC 2050, pulses & legumes	-43.12, (-164.18, 77.94)	-43.24, (-116.15, 29.67)	-48.11, (-131.03, 34.81)	-44.3, (-125.48, 36.88)	-46.03, (-134.43, 42.37)		1522.87, (1438.04, 1607.7)	1585.59, (1534.73, 1636.45)	1584.25, (1526.84, 1641.66)	1548.66, (1492.17, 1605.15)	1671.28, (1609.44, 1733.12)
SDG, pulses & legumes	-37.33, (-158.33, 83.67)	-36.77, (-109.56, 36.02)	-42.02, (-124.77, 40.73)	-37.51, (-118.37, 43.35)	-40.21, (-128.38, 47.96)		1528.66, (1443.93, 1613.39)	1592.06, (1541.37, 1642.75)	1590.34, (1533.17, 1647.51)	1555.45, (1499.43, 1611.47)	1677.1, (1615.6, 1738.6)
Max red meat 60g/day, pulses & legumes	-40.16, (-161.07, 80.75)	-38.99, (-111.75, 33.77)	-44.74, (-127.32, 37.84)	-40.09, (-120.82, 40.64)	-42.36, (-130.42, 45.7)		1525.83, (1441.23, 1610.43)	1589.83, (1539.19, 1640.47)	1587.62, (1530.7, 1644.54)	1552.87, (1497.04, 1608.7)	1674.95, (1613.6, 1736.3)
Max red meat 31g/day, pulses & legumes	-51.22, (-171.91, 69.47)	-48.06, (-120.72, 24.6)	-55.46, (-137.72, 26.8)	-50.96, (-131.49, 29.57)	-51.48, (-139.39, 36.43)		1514.77, (1430.48, 1599.06)	1580.77, (1530.27, 1631.27)	1576.9, (1520.44, 1633.36)	1541.99, (1486.45, 1597.53)	1665.83, (1604.69, 1726.97)
CCC 2030, vegetables	-52.37, (-173.03, 68.29)	-52.53, (-125.41, 20.35)	-56.88, (-139.72, 25.96)	-53.62, (-134.78, 27.54)	-54.59, (-142.72, 33.54)		1513.62, (1429.36, 1597.88)	1576.3, (1525.49, 1627.11)	1575.48, (1518.19, 1632.77)	1539.34, (1482.88, 1595.8)	1662.72, (1601.27, 1724.17)
CCC 2050, vegetables	-73.25, (-193.08, 46.58)	-71.32, (-144.0, 1.36)	-76.98, (-159.29, 5.33)	-73.27, (-154.11, 7.57)	-72.31, (-159.91, 15.29)		1492.74, (1409.69, 1575.79)	1557.51, (1506.98, 1608.04)	1555.38, (1498.86, 1611.9)	1519.68, (1463.69, 1575.67)	1645.0, (1584.31, 1705.69)
SDG, vegetables	-54.41, (-174.32, 65.5)	-49.68, (-122.12, 22.76)	-54.87, (-137.13, 27.39)	-49.41, (-129.49, 30.67)	-51.11, (-138.61, 36.39)		1511.58, (1428.4, 1594.76)	1579.15, (1528.96, 1629.34)	1577.49, (1521.04, 1633.94)	1543.55, (1488.67, 1598.43)	1666.2, (1605.66, 1726.74)
Max red meat 60g/day, vegetables	-60.53, (-180.27, 59.21)	-55.05, (-127.45, 17.35)	-60.67, (-142.69, 21.35)	-55.0, (-134.84, 24.84)	-55.73, (-143.06, 31.6)		1505.46, (1422.54, 1588.38)	1573.78, (1523.66, 1623.9)	1571.69, (1515.6, 1627.78)	1537.95, (1483.41, 1592.49)	1661.58, (1601.28, 1721.88)
Max red meat 31g/day, vegetables	-84.72, (-204.1, 34.66)	-76.5, (-148.77, -4.23)	-84.33, (-165.93, -2.73)	-78.84, (-158.37, 0.69)	-76.1, (-163.25, 11.05)		1481.27, (1398.86, 1563.68)	1552.33, (1502.4, 1602.26)	1548.03, (1492.55, 1603.51)	1514.12, (1460.04, 1568.2)	1641.22, (1581.18, 1701.26)
CCC 2030, egg	-27.31, (-149.06, 94.44)	-29.19, (-102.29, 43.91)	-32.87, (-116.26, 50.52)	-29.52, (-111.0, 51.96)	-32.74, (-121.57, 56.09)		1538.68, (1452.87, 1624.49)	1599.64, (1548.52, 1650.76)	1599.49, (1541.4, 1657.58)	1563.44, (1506.53, 1620.35)	1684.58, (1622.13, 1747.03)
CCC 2050, egg	-29.4, (-151.06, 92.26)	-30.46, (-103.49, 42.57)	-34.97, (-118.2, 48.26)	-31.1, (-112.46, 50.26)	-34.06, (-122.85, 54.73)		1536.59, (1450.91, 1622.27)	1598.37, (1547.34, 1649.4)	1597.39, (1539.53, 1655.25)	1561.85, (1505.11, 1618.59)	1683.25, (1620.85, 1745.65)
SDG, egg	-29.55, (-151.1, 92.0)	-30.89, (-103.88, 42.1)	-36.17, (-119.18, 46.84)	-32.09, (-113.35, 49.17)	-35.25, (-123.74, 53.24)		1536.44, (1450.92, 1621.96)	1597.94, (1546.97, 1648.91)	1596.19, (1538.65, 1653.73)	1560.87, (1504.28, 1617.46)	1682.06, (1620.1, 1744.02)
Max red meat 60g/day, egg	-30.88, (-152.39, 90.63)	-31.68, (-104.64, 41.28)	-37.48, (-120.36, 45.4)	-33.29, (-114.47, 47.89)	-36.27, (-124.69, 52.15)		1535.11, (1449.65, 1620.57)	1597.15, (1546.21, 1648.09)	1594.88, (1537.53, 1652.23)	1559.66, (1503.18, 1616.14)	1681.05, (1619.19, 1742.91)
Max red meat 31g/day, egg	-35.96, (-157.35, 85.43)	-35.1, (-108.01, 37.81)	-42.31, (-124.94, 40.32)	-38.27, (-119.34, 42.8)	-40.27, (-128.57, 48.03)		1530.03, (1444.74, 1615.32)	1593.73, (1542.87, 1644.59)	1590.06, (1533.07, 1647.05)	1554.69, (1498.36, 1611.02)	1677.04, (1615.35, 1738.73)
CCC 2030, non-smoked oily fish	-17.54, (-139.74, 104.66)	-20.08, (-93.27, 53.11)	-23.5, (-107.13, 60.13)	-20.12, (-101.73, 61.49)	-24.21, (-113.33, 64.91)		1548.45, (1462.01, 1634.89)	1608.75, (1557.49, 1660.01)	1608.86, (1550.44, 1667.28)	1572.84, (1515.74, 1629.94)	1693.11, (1630.25, 1755.97)
CCC 2050, non-smoked oily fish	-12.29, (-134.73, 110.15)	-14.52, (-87.72, 58.68)	-18.57, (-102.21, 65.07)	-14.65, (-96.25, 66.95)	-19.13, (-108.43, 70.17)		1553.7, (1466.92, 1640.48)	1614.31, (1563.04, 1665.58)	1613.79, (1555.34, 1672.24)	1578.31, (1521.23, 1635.39)	1698.18, (1635.06, 1761.3)
SDG, non-smoked oily fish	-19.85, (-142.14, 102.44)	-23.56, (-96.82, 49.7)	-28.87, (-112.23, 54.49)	-25.33, (-107.11, 56.45)	-29.06, (-117.97, 59.85)		1546.14, (1459.56, 1632.72)	1605.27, (1553.91, 1656.63)	1603.49, (1545.45, 1661.53)	1567.63, (1510.29, 1624.97)	1688.25, (1625.69, 1750.81)
Max red meat 60g/day, non-smoked oily fish	-19.31, (-141.63, 103.01)	-22.56, (-95.82, 50.7)	-28.43, (-111.71, 54.85)	-24.82, (-106.61, 56.97)	-28.67, (-117.55, 60.21)		1546.68, (1460.06, 1633.3)	1606.27, (1554.91, 1657.63)	1603.93, (1546.0, 1661.86)	1568.13, (1510.78, 1625.48)	1688.64, (1626.12, 1751.16)
Max red meat 31g/day, non-smoked oily fish	-16.94, (-139.29, 105.41)	-18.95, (-92.24, 54.34)	-25.91, (-109.06, 57.24)	-22.44, (-104.27, 59.39)	-26.29, (-115.1, 62.52)		1549.05, (1462.39, 1635.71)	1609.88, (1558.48, 1661.28)	1606.46, (1548.72, 1664.2)	1570.52, (1513.11, 1627.93)	1691.02, (1628.59, 1753.45)
CCC 2030, plant-based meat alternatives	-33.81, (-155.27, 87.65)	-35.24, (-108.28, 37.8)	-39.1, (-122.34, 44.14)	-35.77, (-117.16, 45.62)	-38.4, (-127.05, 50.25)		1532.18, (1446.79, 1617.57)	1593.59, (1542.55, 1644.63)	1593.27, (1535.4, 1651.14)	1557.19, (1500.4, 1613.98)	1678.91, (1616.72, 1741.1)
CCC 2050, plant-based meat alternatives	-40.77, (-161.93, 80.39)	-41.05, (-113.98, 31.88)	-45.86, (-128.83, 37.11)	-42.04, (-123.25, 39.17)	-43.98, (-132.45, 44.49)		1525.22, (1440.25, 1610.19)	1587.78, (1536.9, 1638.66)	1586.5, (1529.02, 1643.98)	1550.92, (1494.39, 1607.45)	1673.34, (1611.41, 1735.27)
SDG, plant-based meat alternatives	-35.99, (-157.08, 85.1)	-35.76, (-108.58, 37.06)	-41.02, (-123.82, 41.78)	-36.58, (-117.51, 44.35)	-39.36, (-127.58, 48.86)		1530.0, (1445.14, 1614.86)	1593.07, (1542.34, 1643.8)	1591.34, (1534.11, 1648.57)	1556.38, (1500.26, 1612.5)	1677.95, (1616.37, 1739.53)
Max red meat 60g/day, plant-based meat alternatives	-38.57, (-159.58, 82.44)	-37.74, (-110.53, 35.05)	-43.49, (-126.12, 39.14)	-38.92, (-119.72, 41.88)	-41.31, (-129.43, 46.81)		1527.42, (1442.67, 1612.17)	1591.09, (1540.4, 1641.78)	1588.87, (1531.88, 1645.86)	1554.04, (1498.1, 1609.98)	1676.0, (1614.56, 1737.44)
Max red meat 31g/day, plant-based meat alternatives	-48.6, (-169.41, 72.21)	-45.83, (-118.53, 26.87)	-53.2, (-135.52, 29.12)	-48.78, (-129.4, 31.84)	-49.56, (-137.54, 38.42)		1517.39, (1432.93, 1601.85)	1582.99, (1532.44, 1633.54)	1579.16, (1522.62, 1635.7)	1544.17, (1488.5, 1599.84)	1667.75, (1606.52, 1728.98)
SDG, chicken	-34.43, (-155.63, 86.77)	-34.58, (-107.44, 38.28)	-39.84, (-122.69, 43.01)	-35.49, (-116.49, 45.51)	-38.36, (-126.64, 49.92)		1531.56, (1446.54, 1616.58)	1594.25, (1543.46, 1645.04)	1592.52, (1535.22, 1649.82)	1557.47, (1501.24, 1613.7)	1678.95, (1617.28, 1740.62)
Max red meat 60g/day, chicken	-36.7, (-157.83, 84.43)	-36.27, (-109.1, 36.56)	-42.03, (-124.72, 40.66)	-37.56, (-118.45, 43.33)	-40.09, (-128.28, 48.1)		1529.29, (1444.37, 1614.21)	1592.56, (1541.82, 1643.3)	1590.33, (1533.25, 1647.41)	1555.4, (1499.33, 1611.47)	1677.22, (1615.68, 1738.76)
Max red meat 31g/day, chicken	-45.53, (-166.47, 75.41)	-43.23, (-115.98, 29.52)	-50.56, (-132.96, 31.84)	-46.23, (-126.96, 34.5)	-47.3, (-135.35, 40.75)		1520.46, (1435.8, 1605.12)	1585.6, (1534.98, 1636.22)	1581.81, (1525.16, 1638.46)	1546.73, (1490.9, 1602.56)	1670.01, (1608.67, 1731.35)

## Sheet: Protein
	Change in Protein, g, (95% UI), SIMD 1 (most deprived)	Change in Protein, g, (95% UI), SIMD 2	Change in Protein, g, (95% UI), SIMD 3	Change in Protein, g, (95% UI), SIMD 4	Change in Protein, g, (95% UI), SIMD 5 (least deprived)		Protein, g, (95% UI), SIMD 1 (most deprived)	Protein, g, (95% UI), SIMD 2	Protein, g, (95% UI), SIMD 3	Protein, g, (95% UI), SIMD 4	Protein, g, (95% UI), SIMD 5 (least deprived)
Baseline							63.69, (59.55, 67.83)	67.2, (65.02, 69.38)	67.52, (64.73, 70.31)	66.25, (64.0, 68.5)	70.81, (67.84, 73.78)
CCC 2030	-6.52, (-12.13, -0.91)	-6.73, (-9.62, -3.84)	-7.0, (-10.69, -3.31)	-6.84, (-9.89, -3.79)	-6.77, (-10.73, -2.81)		57.17, (53.39, 60.95)	60.47, (58.56, 62.38)	60.52, (58.11, 62.93)	59.41, (57.36, 61.46)	64.04, (61.43, 66.65)
CCC 2050	-9.71, (-15.16, -4.26)	-9.79, (-12.61, -6.97)	-10.18, (-13.75, -6.61)	-9.98, (-12.98, -6.98)	-9.63, (-13.45, -5.81)		53.98, (50.44, 57.52)	57.41, (55.62, 59.2)	57.34, (55.12, 59.56)	56.27, (54.29, 58.25)	61.18, (58.78, 63.58)
SDG	-5.96, (-11.62, -0.3)	-5.66, (-8.55, -2.77)	-5.74, (-9.5, -1.98)	-5.34, (-8.34, -2.34)	-5.39, (-9.4, -1.38)		57.73, (53.87, 61.59)	61.54, (59.64, 63.44)	61.77, (59.26, 64.28)	60.91, (58.93, 62.89)	65.42, (62.73, 68.11)
Max red meat 60g/day	-6.66, (-12.3, -1.02)	-6.39, (-9.26, -3.52)	-6.46, (-10.19, -2.73)	-6.03, (-9.02, -3.04)	-5.95, (-9.94, -1.96)		57.03, (53.19, 60.87)	60.81, (58.93, 62.69)	61.06, (58.59, 63.53)	60.22, (58.26, 62.18)	64.86, (62.19, 67.53)
Max red meat 31g/day	-9.43, (-15.06, -3.8)	-9.25, (-12.1, -6.4)	-9.41, (-13.08, -5.74)	-8.94, (-11.93, -5.95)	-8.49, (-12.46, -4.52)		54.26, (50.44, 58.08)	57.95, (56.12, 59.78)	58.11, (55.74, 60.48)	57.31, (55.35, 59.27)	62.32, (59.69, 64.95)
CCC 2030, pulses & legumes	-5.0, (-10.67, 0.67)	-5.1, (-8.04, -2.16)	-5.39, (-9.13, -1.65)	-5.24, (-8.31, -2.17)	-5.19, (-9.19, -1.19)		58.69, (54.82, 62.56)	62.1, (60.13, 64.07)	62.13, (59.65, 64.61)	61.0, (58.91, 63.09)	65.62, (62.94, 68.3)
CCC 2050, pulses & legumes	-7.45, (-12.98, -1.92)	-7.47, (-10.34, -4.6)	-7.86, (-11.5, -4.22)	-7.68, (-10.71, -4.65)	-7.4, (-11.29, -3.51)		56.24, (52.57, 59.91)	59.72, (57.84, 61.6)	59.66, (57.33, 61.99)	58.57, (56.54, 60.6)	63.41, (60.91, 65.91)
SDG, pulses & legumes	-4.44, (-10.15, 1.27)	-4.21, (-7.14, -1.28)	-4.34, (-8.13, -0.55)	-4.02, (-7.05, -0.99)	-4.04, (-8.09, 0.01)		59.25, (55.32, 63.18)	62.99, (61.03, 64.95)	63.18, (60.61, 65.75)	62.23, (60.2, 64.26)	66.77, (64.03, 69.51)
Max red meat 60g/day, pulses & legumes	-4.96, (-10.66, 0.74)	-4.76, (-7.67, -1.85)	-4.88, (-8.65, -1.11)	-4.53, (-7.55, -1.51)	-4.46, (-8.49, -0.43)		58.73, (54.81, 62.65)	62.44, (60.5, 64.38)	62.64, (60.1, 65.18)	61.72, (59.72, 63.72)	66.35, (63.63, 69.07)
Max red meat 31g/day, pulses & legumes	-6.97, (-12.66, -1.28)	-6.91, (-9.79, -4.03)	-7.08, (-10.79, -3.37)	-6.7, (-9.7, -3.7)	-6.36, (-10.36, -2.36)		56.72, (52.81, 60.63)	60.29, (58.41, 62.17)	60.43, (57.98, 62.88)	59.55, (57.57, 61.53)	64.45, (61.77, 67.13)
CCC 2030, vegetables	-5.64, (-11.27, -0.01)	-5.7, (-8.62, -2.78)	-6.0, (-9.71, -2.29)	-5.87, (-8.93, -2.81)	-5.75, (-9.73, -1.77)		58.05, (54.23, 61.87)	61.5, (59.55, 63.45)	61.51, (59.06, 63.96)	60.38, (58.31, 62.45)	65.06, (62.42, 67.7)
CCC 2050, vegetables	-8.58, (-14.06, -3.1)	-8.53, (-11.38, -5.68)	-8.94, (-12.54, -5.34)	-8.76, (-11.78, -5.74)	-8.39, (-12.24, -4.54)		55.11, (51.52, 58.7)	58.67, (56.83, 60.51)	58.58, (56.31, 60.85)	57.48, (55.47, 59.49)	62.42, (59.98, 64.86)
SDG, vegetables	-5.08, (-10.76, 0.6)	-4.7, (-7.61, -1.79)	-4.82, (-8.6, -1.04)	-4.46, (-7.47, -1.45)	-4.45, (-8.47, -0.43)		58.61, (54.72, 62.5)	62.5, (60.56, 64.44)	62.7, (60.15, 65.25)	61.78, (59.78, 63.78)	66.36, (63.65, 69.07)
Max red meat 60g/day, vegetables	-5.72, (-11.38, -0.06)	-5.37, (-8.27, -2.47)	-5.47, (-9.22, -1.72)	-5.09, (-8.09, -2.09)	-4.96, (-8.97, -0.95)		57.97, (54.1, 61.84)	61.83, (59.92, 63.74)	62.04, (59.53, 64.55)	61.16, (59.18, 63.14)	65.85, (63.16, 68.54)
Max red meat 31g/day, vegetables	-8.23, (-13.89, -2.57)	-7.98, (-10.85, -5.11)	-8.17, (-11.86, -4.48)	-7.75, (-10.74, -4.76)	-7.28, (-11.26, -3.3)		55.46, (51.6, 59.32)	59.22, (57.35, 61.09)	59.35, (56.94, 61.76)	58.5, (56.53, 60.47)	63.53, (60.88, 66.18)
CCC 2030, egg	-3.76, (-9.49, 1.97)	-3.94, (-6.91, -0.97)	-4.2, (-7.99, -0.41)	-4.05, (-7.15, -0.95)	-4.11, (-8.16, -0.06)		59.93, (55.96, 63.9)	63.25, (61.23, 65.27)	63.32, (60.76, 65.88)	62.19, (60.06, 64.32)	66.7, (63.94, 69.46)
CCC 2050, egg	-5.28, (-10.92, 0.36)	-5.46, (-8.38, -2.54)	-5.78, (-9.49, -2.07)	-5.59, (-8.66, -2.52)	-5.51, (-9.48, -1.54)		58.41, (54.57, 62.25)	61.74, (59.79, 63.69)	61.74, (59.29, 64.19)	60.66, (58.57, 62.75)	65.3, (62.67, 67.93)
SDG, egg	-3.21, (-9.0, 2.58)	-3.29, (-6.26, -0.32)	-3.41, (-7.24, 0.42)	-3.16, (-6.23, -0.09)	-3.26, (-7.35, 0.83)		60.48, (56.44, 64.52)	63.91, (61.9, 65.92)	64.11, (61.49, 66.73)	63.09, (61.0, 65.18)	67.55, (64.74, 70.36)
Max red meat 60g/day, egg	-3.49, (-9.27, 2.29)	-3.61, (-6.56, -0.66)	-3.73, (-7.55, 0.09)	-3.46, (-6.52, -0.4)	-3.5, (-7.58, 0.58)		60.2, (56.16, 64.24)	63.59, (61.59, 65.59)	63.79, (61.19, 66.39)	62.79, (60.72, 64.86)	67.32, (64.52, 70.12)
Max red meat 31g/day, egg	-4.56, (-10.35, 1.23)	-4.87, (-7.8, -1.94)	-5.01, (-8.79, -1.23)	-4.7, (-7.74, -1.66)	-4.59, (-8.65, -0.53)		59.13, (55.09, 63.17)	62.33, (60.38, 64.28)	62.51, (59.97, 65.05)	61.55, (59.5, 63.6)	66.22, (63.46, 68.98)
CCC 2030, non-smoked oily fish	-2.17, (-8.0, 3.66)	-2.47, (-5.48, 0.54)	-2.68, (-6.53, 1.17)	-2.53, (-5.67, 0.61)	-2.72, (-6.85, 1.41)		61.52, (57.41, 65.63)	64.73, (62.64, 66.82)	64.84, (62.18, 67.5)	63.72, (61.53, 65.91)	68.09, (65.23, 70.95)
CCC 2050, non-smoked oily fish	-2.5, (-8.3, 3.3)	-2.87, (-5.87, 0.13)	-3.12, (-6.94, 0.7)	-2.92, (-6.06, 0.22)	-3.09, (-7.18, 1.0)		61.19, (57.12, 65.26)	64.33, (62.27, 66.39)	64.4, (61.79, 67.01)	63.33, (61.15, 65.51)	67.72, (64.91, 70.53)
SDG, non-smoked oily fish	-1.64, (-7.55, 4.27)	-2.09, (-5.12, 0.94)	-2.23, (-6.13, 1.67)	-2.06, (-5.21, 1.09)	-2.25, (-6.41, 1.91)		62.05, (57.82, 66.28)	65.1, (62.99, 67.21)	65.29, (62.57, 68.01)	64.18, (61.98, 66.38)	68.56, (65.65, 71.47)
Max red meat 60g/day, non-smoked oily fish	-1.61, (-7.53, 4.31)	-2.13, (-5.16, 0.9)	-2.26, (-6.15, 1.63)	-2.08, (-5.23, 1.07)	-2.26, (-6.42, 1.9)		62.08, (57.85, 66.31)	65.07, (62.96, 67.18)	65.26, (62.55, 67.97)	64.17, (61.97, 66.37)	68.55, (65.65, 71.45)
Max red meat 31g/day, non-smoked oily fish	-1.47, (-7.43, 4.49)	-2.25, (-5.27, 0.77)	-2.34, (-6.23, 1.55)	-2.12, (-5.28, 1.04)	-2.32, (-6.46, 1.82)		62.22, (57.94, 66.5)	64.95, (62.85, 67.05)	65.17, (62.46, 67.88)	64.12, (61.91, 66.33)	68.49, (65.61, 71.37)
CCC 2030, plant-based meat alternatives	-3.99, (-9.71, 1.73)	-4.16, (-7.13, -1.19)	-4.42, (-8.2, -0.64)	-4.27, (-7.37, -1.17)	-4.31, (-8.35, -0.27)		59.7, (55.75, 63.65)	63.04, (61.03, 65.05)	63.1, (60.56, 65.64)	61.97, (59.85, 64.09)	66.5, (63.76, 69.24)
CCC 2050, plant-based meat alternatives	-5.68, (-11.3, -0.06)	-5.83, (-8.74, -2.92)	-6.16, (-9.86, -2.46)	-5.98, (-9.05, -2.91)	-5.86, (-9.81, -1.91)		58.01, (54.2, 61.82)	61.37, (59.43, 63.31)	61.36, (58.94, 63.78)	60.27, (58.19, 62.35)	64.95, (62.34, 67.56)
SDG, plant-based meat alternatives	-3.44, (-9.21, 2.33)	-3.46, (-6.42, -0.5)	-3.58, (-7.4, 0.24)	-3.32, (-6.38, -0.26)	-3.4, (-7.48, 0.68)		60.25, (56.23, 64.27)	63.74, (61.74, 65.74)	63.94, (61.33, 66.55)	62.93, (60.86, 65.0)	67.41, (64.61, 70.21)
Max red meat 60g/day, plant-based meat alternatives	-3.76, (-9.52, 2.0)	-3.82, (-6.77, -0.87)	-3.94, (-7.75, -0.13)	-3.65, (-6.7, -0.6)	-3.67, (-7.74, 0.4)		59.93, (55.92, 63.94)	63.38, (61.4, 65.36)	63.58, (60.99, 66.17)	62.59, (60.53, 64.65)	67.14, (64.36, 69.92)
Max red meat 31g/day, plant-based meat alternatives	-5.01, (-10.78, 0.76)	-5.25, (-8.16, -2.34)	-5.39, (-9.15, -1.63)	-5.07, (-8.1, -2.04)	-4.92, (-8.97, -0.87)		58.68, (54.66, 62.7)	61.95, (60.01, 63.89)	62.13, (59.61, 64.65)	61.18, (59.15, 63.21)	65.89, (63.15, 68.63)
SDG, chicken	-0.0, (-6.08, 6.08)	-0.86, (-3.99, 2.27)	-0.99, (-4.97, 2.99)	-0.92, (-4.17, 2.33)	-1.21, (-5.45, 3.03)		63.69, (59.24, 68.14)	66.34, (64.09, 68.59)	66.52, (63.69, 69.35)	65.32, (62.97, 67.67)	69.6, (66.58, 72.62)
Max red meat 60g/day, chicken	0.34, (-5.76, 6.44)	-0.59, (-3.73, 2.55)	-0.73, (-4.72, 3.26)	-0.65, (-3.92, 2.62)	-0.98, (-5.23, 3.27)		64.03, (59.55, 68.51)	66.61, (64.35, 68.87)	66.78, (63.92, 69.64)	65.6, (63.22, 67.98)	69.83, (66.8, 72.86)
Max red meat 31g/day, chicken	1.73, (-4.45, 7.91)	0.48, (-2.69, 3.65)	0.42, (-3.62, 4.46)	0.55, (-2.78, 3.88)	0.04, (-4.21, 4.29)		65.42, (60.82, 70.02)	67.68, (65.38, 69.98)	67.94, (65.02, 70.86)	66.79, (64.34, 69.24)	70.85, (67.81, 73.89)

## Sheet: Calcium
	Change in Calcium, mg, (95% UI), SIMD 1 (most deprived)	Change in Calcium, mg, (95% UI), SIMD 2	Change in Calcium, mg, (95% UI), SIMD 3	Change in Calcium, mg, (95% UI), SIMD 4	Change in Calcium, mg, (95% UI), SIMD 5 (least deprived)		Calcium, mg, (95% UI), SIMD 1 (most deprived)	Calcium, mg, (95% UI), SIMD 2	Calcium, mg, (95% UI), SIMD 3	Calcium, mg, (95% UI), SIMD 4	Calcium, mg, (95% UI), SIMD 5 (least deprived)
Baseline							744.85, (699.83, 789.87)	798.12, (767.56, 828.68)	809.23, (770.07, 848.39)	794.71, (757.19, 832.23)	861.92, (825.55, 898.29)
CCC 2030	-74.62, (-135.2, -14.04)	-84.47, (-124.72, -44.22)	-87.16, (-138.74, -35.58)	-85.23, (-135.0, -35.46)	-93.13, (-140.68, -45.58)		670.23, (629.7, 710.76)	713.65, (687.44, 739.86)	722.07, (688.49, 755.65)	709.48, (676.78, 742.18)	768.79, (738.16, 799.42)
CCC 2050	-77.31, (-137.94, -16.68)	-86.37, (-126.59, -46.15)	-89.3, (-140.9, -37.7)	-87.56, (-137.31, -37.81)	-95.1, (-142.68, -47.52)		667.54, (626.93, 708.15)	711.75, (685.6, 737.9)	719.93, (686.33, 753.53)	707.15, (674.49, 739.81)	766.82, (736.15, 797.49)
SDG	-75.52, (-135.99, -15.05)	-84.52, (-124.64, -44.4)	-87.29, (-138.76, -35.82)	-84.92, (-134.54, -35.3)	-93.4, (-140.97, -45.83)		669.33, (628.97, 709.69)	713.6, (687.6, 739.6)	721.94, (688.54, 755.34)	709.79, (677.32, 742.26)	768.52, (737.86, 799.18)
Max red meat 60g/day	-76.5, (-137.01, -15.99)	-85.11, (-125.22, -45.0)	-87.97, (-139.44, -36.5)	-85.72, (-135.3, -36.14)	-94.0, (-141.58, -46.42)		668.35, (627.92, 708.78)	713.01, (687.03, 738.99)	721.26, (687.85, 754.67)	708.99, (676.58, 741.4)	767.93, (737.26, 798.6)
Max red meat 31g/day	-80.43, (-141.12, -19.74)	-87.45, (-127.5, -47.4)	-90.99, (-142.55, -39.43)	-89.09, (-138.56, -39.62)	-96.52, (-144.14, -48.9)		664.42, (623.72, 705.12)	710.67, (684.78, 736.56)	718.24, (684.7, 751.78)	705.63, (673.39, 737.87)	765.4, (734.66, 796.14)
CCC 2030, pulses & legumes	-40.73, (-102.58, 21.12)	-44.78, (-86.33, -3.23)	-48.84, (-101.63, 3.95)	-47.61, (-98.3, 3.08)	-52.97, (-101.97, -3.97)		704.13, (661.72, 746.54)	753.34, (725.18, 781.5)	760.39, (724.99, 795.79)	747.1, (713.02, 781.18)	808.95, (776.11, 841.79)
CCC 2050, pulses & legumes	-38.18, (-100.13, 23.77)	-41.79, (-83.32, -0.26)	-45.96, (-98.76, 6.84)	-44.9, (-95.55, 5.75)	-50.37, (-99.34, -1.4)		706.68, (664.13, 749.23)	756.33, (728.21, 784.45)	763.27, (727.85, 798.69)	749.81, (715.79, 783.83)	811.55, (778.77, 844.33)
SDG, pulses & legumes	-41.68, (-103.69, 20.33)	-46.1, (-87.65, -4.55)	-50.45, (-103.23, 2.33)	-49.19, (-99.96, 1.58)	-54.92, (-103.96, -5.88)		703.17, (660.52, 745.82)	752.02, (723.87, 780.17)	758.78, (723.39, 794.17)	745.52, (711.33, 779.71)	807.01, (774.11, 839.91)
Max red meat 60g/day, pulses & legumes	-41.32, (-103.38, 20.74)	-45.41, (-86.96, -3.86)	-49.88, (-102.67, 2.91)	-48.76, (-99.52, 2.0)	-54.5, (-103.54, -5.46)		703.53, (660.82, 746.24)	752.71, (724.56, 780.86)	759.35, (723.95, 794.75)	745.95, (711.76, 780.14)	807.42, (774.52, 840.32)
Max red meat 31g/day, pulses & legumes	-39.93, (-102.13, 22.27)	-42.72, (-84.25, -1.19)	-47.65, (-100.5, 5.2)	-46.86, (-97.61, 3.89)	-52.47, (-101.49, -3.45)		704.92, (662.0, 747.84)	755.4, (727.27, 783.53)	761.59, (726.09, 797.09)	747.85, (713.69, 782.01)	809.46, (776.59, 842.33)
CCC 2030, vegetables	-42.11, (-103.95, 19.73)	-46.07, (-87.61, -4.53)	-50.17, (-102.96, 2.62)	-48.94, (-99.63, 1.75)	-54.18, (-103.2, -5.16)		702.74, (660.34, 745.14)	752.05, (723.9, 780.2)	759.06, (723.66, 794.46)	745.77, (711.68, 779.86)	807.74, (774.87, 840.61)
CCC 2050, vegetables	-40.6, (-102.53, 21.33)	-44.06, (-85.58, -2.54)	-48.29, (-101.09, 4.51)	-47.23, (-97.89, 3.43)	-52.49, (-101.49, -3.49)		704.25, (661.73, 746.77)	754.06, (725.95, 782.17)	760.94, (725.52, 796.36)	747.48, (713.45, 781.51)	809.44, (776.61, 842.27)
SDG, vegetables	-43.06, (-105.0, 18.88)	-47.14, (-88.65, -5.63)	-51.49, (-104.25, 1.27)	-50.15, (-100.87, 0.57)	-55.79, (-104.85, -6.73)		701.8, (659.26, 744.34)	750.98, (722.88, 779.08)	757.74, (722.39, 793.09)	744.56, (710.43, 778.69)	806.13, (773.21, 839.05)
Max red meat 60g/day, vegetables	-42.96, (-104.95, 19.03)	-46.71, (-88.22, -5.2)	-51.17, (-103.93, 1.59)	-49.96, (-100.67, 0.75)	-55.58, (-104.64, -6.52)		701.89, (659.28, 744.5)	751.41, (723.32, 779.5)	758.07, (722.7, 793.44)	744.75, (710.64, 778.86)	806.34, (773.42, 839.26)
Max red meat 31g/day, vegetables	-42.63, (-104.77, 19.51)	-45.02, (-86.5, -3.54)	-49.97, (-102.8, 2.86)	-49.11, (-99.79, 1.57)	-54.45, (-103.5, -5.4)		702.22, (659.4, 745.04)	753.11, (725.05, 781.17)	759.26, (723.8, 794.72)	745.6, (711.54, 779.66)	807.47, (774.56, 840.38)
CCC 2030, egg	-38.61, (-100.48, 23.26)	-42.81, (-84.37, -1.25)	-46.81, (-99.6, 5.98)	-45.57, (-96.25, 5.11)	-51.12, (-100.1, -2.14)		706.24, (663.8, 748.68)	755.31, (727.14, 783.48)	762.42, (727.02, 797.82)	749.14, (715.07, 783.21)	810.8, (778.0, 843.6)
CCC 2050, egg	-34.47, (-96.45, 27.51)	-38.34, (-79.88, 3.2)	-42.41, (-95.21, 10.39)	-41.33, (-91.97, 9.31)	-47.14, (-96.06, 1.78)		710.38, (667.78, 752.98)	759.78, (731.63, 787.93)	766.82, (731.4, 802.24)	753.38, (719.38, 787.38)	814.79, (782.07, 847.51)
SDG, egg	-39.58, (-101.71, 22.55)	-44.51, (-86.11, -2.91)	-48.87, (-101.68, 3.94)	-47.72, (-98.55, 3.11)	-53.58, (-102.6, -4.56)		705.27, (662.46, 748.08)	753.61, (725.38, 781.84)	760.36, (724.92, 795.8)	746.99, (712.7, 781.28)	808.35, (775.48, 841.22)
Max red meat 60g/day, egg	-38.81, (-100.98, 23.36)	-43.44, (-85.05, -1.83)	-47.92, (-100.74, 4.9)	-46.93, (-97.77, 3.91)	-52.86, (-101.88, -3.84)		706.04, (663.17, 748.91)	754.68, (726.44, 782.92)	761.31, (725.86, 796.76)	747.78, (713.48, 782.08)	809.06, (776.19, 841.93)
Max red meat 31g/day, egg	-35.81, (-98.12, 26.5)	-39.22, (-80.83, 2.39)	-44.09, (-96.98, 8.8)	-43.44, (-94.3, 7.42)	-49.44, (-98.42, -0.46)		709.04, (665.96, 752.12)	758.9, (730.65, 787.15)	765.14, (729.59, 800.69)	751.28, (716.95, 785.61)	812.48, (779.67, 845.29)
CCC 2030, non-smoked oily fish	-40.01, (-101.87, 21.85)	-44.11, (-85.66, -2.56)	-48.16, (-100.95, 4.63)	-46.92, (-97.61, 3.77)	-52.35, (-101.34, -3.36)		704.84, (662.42, 747.26)	754.01, (725.85, 782.17)	761.08, (725.68, 796.48)	747.79, (713.71, 781.87)	809.58, (776.75, 842.41)
CCC 2050, non-smoked oily fish	-36.92, (-98.88, 25.04)	-40.62, (-82.15, 0.91)	-44.76, (-97.56, 8.04)	-43.69, (-94.33, 6.95)	-49.27, (-98.22, -0.32)		707.93, (665.36, 750.5)	757.5, (729.37, 785.63)	764.47, (729.05, 799.89)	751.02, (717.01, 785.03)	812.65, (779.89, 845.41)
SDG, non-smoked oily fish	-40.97, (-103.02, 21.08)	-45.56, (-87.13, -3.99)	-49.92, (-102.71, 2.87)	-48.69, (-99.48, 2.1)	-54.46, (-103.49, -5.43)		703.88, (661.18, 746.58)	752.56, (724.38, 780.74)	759.31, (723.91, 794.71)	746.02, (711.79, 780.25)	807.46, (774.57, 840.35)
Max red meat 60g/day, non-smoked oily fish	-40.47, (-102.57, 21.63)	-44.74, (-86.31, -3.17)	-49.22, (-102.02, 3.58)	-48.14, (-98.93, 2.65)	-53.95, (-102.98, -4.92)		704.38, (661.62, 747.14)	753.38, (725.2, 781.56)	760.01, (724.59, 795.43)	746.57, (712.35, 780.79)	807.97, (775.08, 840.86)
Max red meat 31g/day, non-smoked oily fish	-38.53, (-100.77, 23.71)	-41.54, (-83.1, 0.02)	-46.44, (-99.3, 6.42)	-45.7, (-96.48, 5.08)	-51.44, (-100.45, -2.43)		706.32, (663.35, 749.29)	756.58, (728.41, 784.75)	762.79, (727.28, 798.3)	749.01, (714.79, 783.23)	810.48, (777.63, 843.33)
CCC 2030, plant-based meat alternatives	-23.08, (-85.13, 38.97)	-28.33, (-69.96, 13.3)	-31.93, (-84.74, 20.88)	-30.63, (-81.27, 20.01)	-37.58, (-86.39, 11.23)		721.78, (679.09, 764.47)	769.79, (741.52, 798.06)	777.3, (741.87, 812.73)	764.08, (730.07, 798.09)	824.35, (791.8, 856.9)
CCC 2050, plant-based meat alternatives	-7.29, (-69.64, 55.06)	-13.01, (-54.71, 28.69)	-16.37, (-69.25, 36.51)	-15.19, (-65.78, 35.4)	-23.43, (-72.12, 25.26)		737.56, (694.43, 780.69)	785.11, (756.73, 813.49)	792.86, (757.33, 828.39)	779.52, (745.58, 813.46)	838.5, (806.14, 870.86)
SDG, plant-based meat alternatives	-24.17, (-87.29, 38.95)	-32.86, (-74.96, 9.24)	-37.28, (-90.42, 15.86)	-36.98, (-88.39, 14.43)	-43.74, (-92.67, 5.19)		720.68, (676.45, 764.91)	765.26, (736.3, 794.22)	771.95, (736.02, 807.88)	757.73, (722.58, 792.88)	818.18, (785.46, 850.9)
Max red meat 60g/day, plant-based meat alternatives	-20.43, (-83.63, 42.77)	-28.95, (-71.11, 13.21)	-33.55, (-86.72, 19.62)	-33.47, (-85.01, 18.07)	-40.79, (-89.72, 8.14)		724.42, (680.07, 768.77)	769.17, (740.13, 798.21)	775.69, (739.72, 811.66)	761.24, (725.9, 796.58)	821.13, (788.4, 853.86)
Max red meat 31g/day, plant-based meat alternatives	-5.59, (-68.98, 57.8)	-13.56, (-55.93, 28.81)	-18.04, (-71.34, 35.26)	-18.29, (-70.17, 33.59)	-27.23, (-76.03, 21.57)		739.27, (694.65, 783.89)	784.56, (755.2, 813.92)	791.19, (755.03, 827.35)	776.42, (740.59, 812.25)	834.69, (802.15, 867.23)
SDG, chicken	-47.6, (-109.33, 14.13)	-50.57, (-91.98, -9.16)	-54.91, (-107.6, -2.22)	-53.31, (-103.9, -2.72)	-58.69, (-107.8, -9.58)		697.25, (655.02, 739.48)	747.55, (719.6, 775.5)	754.32, (719.06, 789.58)	741.4, (707.47, 775.33)	803.23, (770.23, 836.23)
Max red meat 60g/day, chicken	-48.38, (-110.15, 13.39)	-50.98, (-92.38, -9.58)	-55.41, (-108.11, -2.71)	-53.93, (-104.48, -3.38)	-59.14, (-108.25, -10.03)		696.47, (654.17, 738.77)	747.14, (719.21, 775.07)	753.83, (718.56, 789.1)	740.78, (706.9, 774.66)	802.78, (769.78, 835.78)
Max red meat 31g/day, chicken	-51.54, (-113.49, 10.41)	-52.58, (-93.92, -11.24)	-57.66, (-110.44, -4.88)	-56.53, (-106.99, -6.07)	-61.0, (-110.15, -11.85)		693.31, (650.76, 735.86)	745.54, (717.7, 773.38)	751.58, (716.2, 786.96)	738.18, (704.44, 771.92)	800.92, (767.86, 833.98)

## Sheet: Iron
	Change in Iron, mg, (95% UI), SIMD 1 (most deprived)	Change in Iron, mg, (95% UI), SIMD 2	Change in Iron, mg, (95% UI), SIMD 3	Change in Iron, mg, (95% UI), SIMD 4	Change in Iron, mg, (95% UI), SIMD 5 (least deprived)		Iron, mg, (95% UI), SIMD 1 (most deprived)	Iron, mg, (95% UI), SIMD 2	Iron, mg, (95% UI), SIMD 3	Iron, mg, (95% UI), SIMD 4	Iron, mg, (95% UI), SIMD 5 (least deprived)
Baseline							8.75, (8.18, 9.32)	9.45, (9.13, 9.77)	9.64, (9.22, 10.06)	9.17, (8.74, 9.6)	10.55, (10.05, 11.05)
CCC 2030	-0.22, (-1.02, 0.58)	-0.22, (-0.67, 0.23)	-0.21, (-0.81, 0.39)	-0.21, (-0.81, 0.39)	-0.19, (-0.89, 0.51)		8.53, (7.96, 9.1)	9.23, (8.91, 9.55)	9.43, (9.01, 9.85)	8.96, (8.54, 9.38)	10.35, (9.86, 10.84)
CCC 2050	-0.37, (-1.17, 0.43)	-0.37, (-0.82, 0.08)	-0.35, (-0.95, 0.25)	-0.36, (-0.96, 0.24)	-0.33, (-1.03, 0.37)		8.37, (7.81, 8.93)	9.08, (8.76, 9.4)	9.29, (8.87, 9.71)	8.82, (8.4, 9.24)	10.22, (9.73, 10.71)
SDG	-0.26, (-1.05, 0.53)	-0.22, (-0.67, 0.23)	-0.21, (-0.81, 0.39)	-0.2, (-0.8, 0.4)	-0.19, (-0.89, 0.51)		8.49, (7.94, 9.04)	9.22, (8.9, 9.54)	9.43, (9.01, 9.85)	8.97, (8.55, 9.39)	10.36, (9.87, 10.85)
Max red meat 60g/day	-0.31, (-1.1, 0.48)	-0.27, (-0.72, 0.18)	-0.26, (-0.86, 0.34)	-0.25, (-0.85, 0.35)	-0.22, (-0.91, 0.47)		8.43, (7.88, 8.98)	9.17, (8.85, 9.49)	9.38, (8.96, 9.8)	8.93, (8.51, 9.35)	10.33, (9.85, 10.81)
Max red meat 31g/day	-0.53, (-1.33, 0.27)	-0.47, (-0.92, -0.02)	-0.46, (-1.05, 0.13)	-0.45, (-1.05, 0.15)	-0.4, (-1.09, 0.29)		8.22, (7.66, 8.78)	8.97, (8.65, 9.29)	9.19, (8.77, 9.61)	8.72, (8.3, 9.14)	10.15, (9.67, 10.63)
CCC 2030, pulses & legumes	0.17, (-0.64, 0.98)	0.18, (-0.28, 0.64)	0.19, (-0.41, 0.79)	0.19, (-0.42, 0.8)	0.19, (-0.52, 0.9)		8.92, (8.34, 9.5)	9.63, (9.3, 9.96)	9.83, (9.4, 10.26)	9.36, (8.93, 9.79)	10.74, (10.24, 11.24)
CCC 2050, pulses & legumes	0.23, (-0.58, 1.04)	0.23, (-0.23, 0.69)	0.24, (-0.37, 0.85)	0.24, (-0.37, 0.85)	0.24, (-0.47, 0.95)		8.97, (8.39, 9.55)	9.67, (9.34, 10.0)	9.89, (9.46, 10.32)	9.41, (8.98, 9.84)	10.79, (10.28, 11.3)
SDG, pulses & legumes	0.13, (-0.69, 0.95)	0.13, (-0.33, 0.59)	0.13, (-0.47, 0.73)	0.13, (-0.48, 0.74)	0.14, (-0.57, 0.85)		8.88, (8.29, 9.47)	9.58, (9.26, 9.9)	9.78, (9.35, 10.21)	9.3, (8.87, 9.73)	10.69, (10.19, 11.19)
Max red meat 60g/day, pulses & legumes	0.13, (-0.69, 0.95)	0.13, (-0.33, 0.59)	0.13, (-0.47, 0.73)	0.13, (-0.48, 0.74)	0.14, (-0.57, 0.85)		8.87, (8.28, 9.46)	9.57, (9.25, 9.89)	9.78, (9.35, 10.21)	9.3, (8.87, 9.73)	10.69, (10.19, 11.19)
Max red meat 31g/day, pulses & legumes	0.12, (-0.7, 0.94)	0.13, (-0.33, 0.59)	0.14, (-0.46, 0.74)	0.12, (-0.49, 0.73)	0.14, (-0.57, 0.85)		8.87, (8.28, 9.46)	9.57, (9.25, 9.89)	9.78, (9.35, 10.21)	9.3, (8.87, 9.73)	10.69, (10.19, 11.19)
CCC 2030, vegetables	0.02, (-0.79, 0.83)	0.04, (-0.42, 0.5)	0.05, (-0.55, 0.65)	0.04, (-0.57, 0.65)	0.06, (-0.64, 0.76)		8.77, (8.2, 9.34)	9.49, (9.17, 9.81)	9.69, (9.26, 10.12)	9.22, (8.79, 9.65)	10.61, (10.11, 11.11)
CCC 2050, vegetables	-0.04, (-0.85, 0.77)	-0.02, (-0.48, 0.44)	-0.01, (-0.61, 0.59)	-0.02, (-0.63, 0.59)	0.01, (-0.69, 0.71)		8.71, (8.14, 9.28)	9.42, (9.1, 9.74)	9.63, (9.2, 10.06)	9.16, (8.73, 9.59)	10.56, (10.06, 11.06)
SDG, vegetables	-0.02, (-0.83, 0.79)	0.02, (-0.44, 0.48)	0.02, (-0.58, 0.62)	0.02, (-0.59, 0.63)	0.04, (-0.66, 0.74)		8.73, (8.16, 9.3)	9.46, (9.14, 9.78)	9.66, (9.24, 10.08)	9.2, (8.77, 9.63)	10.59, (10.1, 11.08)
Max red meat 60g/day, vegetables	-0.05, (-0.86, 0.76)	-0.01, (-0.47, 0.45)	-0.01, (-0.61, 0.59)	-0.0, (-0.6, 0.6)	0.02, (-0.68, 0.72)		8.69, (8.12, 9.26)	9.43, (9.11, 9.75)	9.64, (9.22, 10.06)	9.17, (8.75, 9.59)	10.57, (10.08, 11.06)
Max red meat 31g/day, vegetables	-0.17, (-0.98, 0.64)	-0.12, (-0.57, 0.33)	-0.11, (-0.71, 0.49)	-0.12, (-0.72, 0.48)	-0.07, (-0.77, 0.63)		8.57, (8.0, 9.14)	9.32, (9.0, 9.64)	9.53, (9.11, 9.95)	9.05, (8.63, 9.47)	10.48, (9.99, 10.97)
CCC 2030, egg	0.21, (-0.6, 1.02)	0.22, (-0.24, 0.68)	0.22, (-0.38, 0.82)	0.22, (-0.39, 0.83)	0.22, (-0.49, 0.93)		8.95, (8.37, 9.53)	9.66, (9.33, 9.99)	9.87, (9.44, 10.3)	9.39, (8.96, 9.82)	10.77, (10.27, 11.27)
CCC 2050, egg	0.29, (-0.52, 1.1)	0.28, (-0.18, 0.74)	0.3, (-0.31, 0.91)	0.3, (-0.31, 0.91)	0.29, (-0.42, 1.0)		9.03, (8.45, 9.61)	9.73, (9.4, 10.06)	9.94, (9.51, 10.37)	9.47, (9.04, 9.9)	10.84, (10.33, 11.35)
SDG, egg	0.16, (-0.66, 0.98)	0.16, (-0.3, 0.62)	0.16, (-0.44, 0.76)	0.15, (-0.46, 0.76)	0.16, (-0.55, 0.87)		8.91, (8.32, 9.5)	9.6, (9.27, 9.93)	9.8, (9.37, 10.23)	9.32, (8.89, 9.75)	10.71, (10.21, 11.21)
Max red meat 60g/day, egg	0.17, (-0.65, 0.99)	0.16, (-0.3, 0.62)	0.17, (-0.43, 0.77)	0.16, (-0.45, 0.77)	0.17, (-0.54, 0.88)		8.91, (8.32, 9.5)	9.61, (9.28, 9.94)	9.81, (9.38, 10.24)	9.33, (8.9, 9.76)	10.72, (10.22, 11.22)
Max red meat 31g/day, egg	0.19, (-0.64, 1.02)	0.18, (-0.28, 0.64)	0.2, (-0.41, 0.81)	0.18, (-0.43, 0.79)	0.19, (-0.52, 0.9)		8.93, (8.33, 9.53)	9.63, (9.3, 9.96)	9.84, (9.41, 10.27)	9.35, (8.92, 9.78)	10.74, (10.23, 11.25)
CCC 2030, non-smoked oily fish	0.0, (-0.81, 0.81)	0.02, (-0.44, 0.48)	0.02, (-0.58, 0.62)	0.02, (-0.59, 0.63)	0.04, (-0.66, 0.74)		8.75, (8.18, 9.32)	9.47, (9.15, 9.79)	9.67, (9.25, 10.09)	9.19, (8.76, 9.62)	10.59, (10.09, 11.09)
CCC 2050, non-smoked oily fish	-0.08, (-0.89, 0.73)	-0.06, (-0.52, 0.4)	-0.05, (-0.65, 0.55)	-0.05, (-0.66, 0.56)	-0.02, (-0.72, 0.68)		8.67, (8.1, 9.24)	9.39, (9.07, 9.71)	9.59, (9.17, 10.01)	9.12, (8.69, 9.55)	10.52, (10.02, 11.02)
SDG, non-smoked oily fish	-0.04, (-0.85, 0.77)	0.0, (-0.45, 0.45)	0.0, (-0.6, 0.6)	0.01, (-0.59, 0.61)	0.03, (-0.67, 0.73)		8.7, (8.13, 9.27)	9.45, (9.13, 9.77)	9.65, (9.23, 10.07)	9.18, (8.76, 9.6)	10.58, (10.09, 11.07)
Max red meat 60g/day, non-smoked oily fish	-0.08, (-0.89, 0.73)	-0.03, (-0.49, 0.43)	-0.03, (-0.63, 0.57)	-0.02, (-0.62, 0.58)	0.0, (-0.7, 0.7)		8.67, (8.1, 9.24)	9.41, (9.09, 9.73)	9.62, (9.2, 10.04)	9.15, (8.73, 9.57)	10.55, (10.06, 11.04)
Max red meat 31g/day, non-smoked oily fish	-0.22, (-1.03, 0.59)	-0.16, (-0.61, 0.29)	-0.15, (-0.75, 0.45)	-0.16, (-0.76, 0.44)	-0.11, (-0.81, 0.59)		8.53, (7.96, 9.1)	9.28, (8.96, 9.6)	9.49, (9.07, 9.91)	9.02, (8.6, 9.44)	10.44, (9.95, 10.93)
CCC 2030, plant-based meat alternatives	0.18, (-0.63, 0.99)	0.19, (-0.27, 0.65)	0.19, (-0.41, 0.79)	0.19, (-0.42, 0.8)	0.2, (-0.51, 0.91)		8.92, (8.34, 9.5)	9.63, (9.3, 9.96)	9.84, (9.41, 10.27)	9.36, (8.93, 9.79)	10.74, (10.24, 11.24)
CCC 2050, plant-based meat alternatives	0.23, (-0.58, 1.04)	0.23, (-0.23, 0.69)	0.24, (-0.37, 0.85)	0.24, (-0.37, 0.85)	0.24, (-0.47, 0.95)		8.97, (8.39, 9.55)	9.67, (9.34, 10.0)	9.89, (9.46, 10.32)	9.41, (8.98, 9.84)	10.79, (10.28, 11.3)
SDG, plant-based meat alternatives	0.13, (-0.69, 0.95)	0.13, (-0.33, 0.59)	0.13, (-0.47, 0.73)	0.13, (-0.48, 0.74)	0.14, (-0.57, 0.85)		8.88, (8.29, 9.47)	9.58, (9.26, 9.9)	9.78, (9.35, 10.21)	9.3, (8.87, 9.73)	10.69, (10.19, 11.19)
Max red meat 60g/day, plant-based meat alternatives	0.13, (-0.69, 0.95)	0.13, (-0.33, 0.59)	0.13, (-0.47, 0.73)	0.13, (-0.48, 0.74)	0.14, (-0.57, 0.85)		8.88, (8.29, 9.47)	9.58, (9.26, 9.9)	9.78, (9.35, 10.21)	9.3, (8.87, 9.73)	10.69, (10.19, 11.19)
Max red meat 31g/day, plant-based meat alternatives	0.12, (-0.7, 0.94)	0.13, (-0.33, 0.59)	0.14, (-0.46, 0.74)	0.13, (-0.48, 0.74)	0.14, (-0.57, 0.85)		8.87, (8.28, 9.46)	9.57, (9.24, 9.9)	9.78, (9.35, 10.21)	9.3, (8.87, 9.73)	10.69, (10.19, 11.19)
SDG, chicken	-0.07, (-0.87, 0.73)	-0.02, (-0.47, 0.43)	-0.02, (-0.62, 0.58)	-0.01, (-0.61, 0.59)	0.01, (-0.69, 0.71)		8.67, (8.11, 9.23)	9.42, (9.1, 9.74)	9.62, (9.2, 10.04)	9.16, (8.74, 9.58)	10.56, (10.07, 11.05)
Max red meat 60g/day, chicken	-0.11, (-0.91, 0.69)	-0.06, (-0.51, 0.39)	-0.06, (-0.66, 0.54)	-0.05, (-0.65, 0.55)	-0.02, (-0.72, 0.68)		8.63, (8.07, 9.19)	9.38, (9.06, 9.7)	9.59, (9.17, 10.01)	9.12, (8.7, 9.54)	10.53, (10.04, 11.02)
Max red meat 31g/day, chicken	-0.28, (-1.08, 0.52)	-0.21, (-0.66, 0.24)	-0.2, (-0.8, 0.4)	-0.21, (-0.81, 0.39)	-0.15, (-0.85, 0.55)		8.47, (7.9, 9.04)	9.23, (8.91, 9.55)	9.44, (9.02, 9.86)	8.97, (8.55, 9.39)	10.4, (9.91, 10.89)

## Sheet: Iodine
	Change in Iodine, ug, (95% UI), SIMD 1 (most deprived)	Change in Iodine, ug, (95% UI), SIMD 2	Change in Iodine, ug, (95% UI), SIMD 3	Change in Iodine, ug, (95% UI), SIMD 4	Change in Iodine, ug, (95% UI), SIMD 5 (least deprived)		Iodine, ug, (95% UI), SIMD 1 (most deprived)	Iodine, ug, (95% UI), SIMD 2	Iodine, ug, (95% UI), SIMD 3	Iodine, ug, (95% UI), SIMD 4	Iodine, ug, (95% UI), SIMD 5 (least deprived)
Baseline							132.42, (121.46, 143.38)	153.81, (146.45, 161.17)	145.31, (136.82, 153.8)	136.4, (128.68, 144.12)	159.34, (149.56, 169.12)
CCC 2030	-14.11, (-29.15, 0.93)	-16.42, (-26.33, -6.51)	-16.18, (-27.72, -4.64)	-15.83, (-26.28, -5.38)	-17.03, (-30.33, -3.73)		118.31, (108.01, 128.61)	137.39, (130.75, 144.03)	129.13, (121.32, 136.94)	120.58, (113.53, 127.63)	142.31, (133.3, 151.32)
CCC 2050	-15.08, (-30.13, -0.03)	-17.33, (-27.23, -7.43)	-17.11, (-28.66, -5.56)	-16.77, (-27.23, -6.31)	-17.86, (-31.17, -4.55)		117.33, (107.02, 127.64)	136.47, (129.84, 143.1)	128.21, (120.38, 136.04)	119.63, (112.57, 126.69)	141.48, (132.45, 150.51)
SDG	-14.04, (-29.06, 0.98)	-16.19, (-26.08, -6.3)	-15.89, (-27.42, -4.36)	-15.5, (-25.91, -5.09)	-16.74, (-30.04, -3.44)		118.37, (108.09, 128.65)	137.61, (131.0, 144.22)	129.42, (121.63, 137.21)	120.9, (113.91, 127.89)	142.6, (133.58, 151.62)
Max red meat 60g/day	-14.31, (-29.35, 0.73)	-16.44, (-26.33, -6.55)	-16.13, (-27.66, -4.6)	-15.75, (-26.16, -5.34)	-16.93, (-30.23, -3.63)		118.1, (107.81, 128.39)	137.37, (130.76, 143.98)	129.19, (121.39, 136.99)	120.65, (113.67, 127.63)	142.41, (133.39, 151.43)
Max red meat 31g/day	-15.41, (-30.48, -0.34)	-17.43, (-27.31, -7.55)	-17.13, (-28.68, -5.58)	-16.83, (-27.23, -6.43)	-17.78, (-31.1, -4.46)		117.01, (106.67, 127.35)	136.38, (129.78, 142.98)	128.18, (120.35, 136.01)	119.57, (112.6, 126.54)	141.56, (132.52, 150.6)
CCC 2030, pulses & legumes	-12.12, (-27.22, 2.98)	-14.06, (-24.03, -4.09)	-13.87, (-25.46, -2.28)	-13.64, (-24.14, -3.14)	-14.68, (-28.04, -1.32)		120.29, (109.9, 130.68)	139.74, (133.01, 146.47)	131.44, (123.55, 139.33)	122.76, (115.64, 129.88)	144.66, (135.56, 153.76)
CCC 2050, pulses & legumes	-12.74, (-27.85, 2.37)	-14.64, (-24.61, -4.67)	-14.45, (-26.05, -2.85)	-14.24, (-24.74, -3.74)	-15.19, (-28.55, -1.83)		119.67, (109.27, 130.07)	139.17, (132.44, 145.9)	130.86, (122.96, 138.76)	122.16, (115.03, 129.29)	144.15, (135.04, 153.26)
SDG, pulses & legumes	-12.06, (-27.16, 3.04)	-13.92, (-23.88, -3.96)	-13.69, (-25.27, -2.11)	-13.45, (-23.92, -2.98)	-14.51, (-27.87, -1.15)		120.35, (109.96, 130.74)	139.89, (133.18, 146.6)	131.63, (123.75, 139.51)	122.96, (115.88, 130.04)	144.84, (135.74, 153.94)
Max red meat 60g/day, pulses & legumes	-12.24, (-27.35, 2.87)	-14.08, (-24.04, -4.12)	-13.83, (-25.42, -2.24)	-13.62, (-24.09, -3.15)	-14.62, (-27.98, -1.26)		120.17, (109.77, 130.57)	139.73, (133.02, 146.44)	131.48, (123.6, 139.36)	122.79, (115.72, 129.86)	144.72, (135.61, 153.83)
Max red meat 31g/day, pulses & legumes	-12.97, (-28.11, 2.17)	-14.73, (-24.68, -4.78)	-14.48, (-26.08, -2.88)	-14.34, (-24.81, -3.87)	-15.16, (-28.53, -1.79)		119.44, (109.0, 129.88)	139.08, (132.38, 145.78)	130.83, (122.93, 138.73)	122.07, (115.0, 129.14)	144.18, (135.06, 153.3)
CCC 2030, vegetables	-12.29, (-27.39, 2.81)	-14.22, (-24.19, -4.25)	-14.04, (-25.63, -2.45)	-13.81, (-24.31, -3.31)	-14.83, (-28.19, -1.47)		120.12, (109.73, 130.51)	139.59, (132.86, 146.32)	131.27, (123.38, 139.16)	122.6, (115.48, 129.72)	144.52, (135.42, 153.62)
CCC 2050, vegetables	-13.04, (-28.15, 2.07)	-14.92, (-24.89, -4.95)	-14.74, (-26.34, -3.14)	-14.53, (-25.04, -4.02)	-15.45, (-28.82, -2.08)		119.38, (108.98, 129.78)	138.89, (132.16, 145.62)	130.57, (122.66, 138.48)	121.87, (114.74, 129.0)	143.89, (134.78, 153.0)
SDG, vegetables	-12.23, (-27.32, 2.86)	-14.05, (-24.01, -4.09)	-13.81, (-25.39, -2.23)	-13.57, (-24.04, -3.1)	-14.61, (-27.97, -1.25)		120.18, (109.8, 130.56)	139.76, (133.05, 146.47)	131.5, (123.62, 139.38)	122.84, (115.77, 129.91)	144.73, (135.62, 153.84)
Max red meat 60g/day, vegetables	-12.45, (-27.55, 2.65)	-14.24, (-24.19, -4.29)	-13.99, (-25.58, -2.4)	-13.76, (-24.22, -3.3)	-14.76, (-28.12, -1.4)		119.97, (109.58, 130.36)	139.57, (132.86, 146.28)	131.32, (123.44, 139.2)	122.64, (115.57, 129.71)	144.59, (135.48, 153.7)
Max red meat 31g/day, vegetables	-13.3, (-28.44, 1.84)	-15.01, (-24.96, -5.06)	-14.76, (-26.36, -3.16)	-14.61, (-25.07, -4.15)	-15.41, (-28.78, -2.04)		119.11, (108.67, 129.55)	138.8, (132.1, 145.5)	130.55, (122.64, 138.46)	121.79, (114.73, 128.85)	143.94, (134.81, 153.07)
CCC 2030, egg	-3.59, (-18.81, 11.63)	-6.11, (-16.13, 3.91)	-5.69, (-17.23, 5.85)	-5.43, (-15.94, 5.08)	-7.23, (-20.53, 6.07)		128.83, (118.28, 139.38)	147.7, (140.89, 154.51)	139.62, (131.8, 147.44)	130.97, (123.84, 138.1)	152.11, (143.09, 161.13)
CCC 2050, egg	2.2, (-13.16, 17.56)	-0.72, (-10.8, 9.36)	-0.14, (-11.69, 11.41)	0.13, (-10.41, 10.67)	-2.16, (-15.46, 11.14)		134.62, (123.87, 145.37)	153.09, (146.2, 159.98)	145.17, (137.35, 152.99)	136.53, (129.35, 143.71)	157.18, (148.17, 166.19)
SDG, egg	-3.59, (-19.22, 12.04)	-7.52, (-17.69, 2.65)	-7.31, (-18.95, 4.33)	-7.55, (-18.36, 3.26)	-9.1, (-22.4, 4.2)		128.82, (117.68, 139.96)	146.29, (139.26, 153.32)	138.0, (130.04, 145.96)	128.86, (121.29, 136.43)	150.24, (141.22, 159.26)
Max red meat 60g/day, egg	-2.14, (-17.79, 13.51)	-6.12, (-16.33, 4.09)	-5.93, (-17.57, 5.71)	-6.22, (-17.09, 4.65)	-7.99, (-21.29, 5.31)		130.27, (119.1, 141.44)	147.69, (140.61, 154.77)	139.38, (131.42, 147.34)	130.18, (122.53, 137.83)	151.35, (142.33, 160.37)
Max red meat 31g/day, egg	3.64, (-12.05, 19.33)	-0.62, (-10.96, 9.72)	-0.16, (-11.83, 11.51)	-0.51, (-11.57, 10.55)	-2.96, (-16.22, 10.3)		136.06, (124.83, 147.29)	153.19, (145.92, 160.46)	145.15, (137.15, 153.15)	135.89, (127.97, 143.81)	156.39, (147.43, 165.35)
CCC 2030, non-smoked oily fish	-9.21, (-24.34, 5.92)	-11.35, (-21.33, -1.37)	-11.09, (-22.66, 0.48)	-10.85, (-21.35, -0.35)	-12.14, (-25.47, 1.19)		123.2, (112.77, 133.63)	142.45, (135.7, 149.2)	134.22, (126.36, 142.08)	125.56, (118.44, 132.68)	147.2, (138.14, 156.26)
CCC 2050, non-smoked oily fish	-7.65, (-22.82, 7.52)	-9.9, (-19.9, 0.1)	-9.58, (-21.14, 1.98)	-9.35, (-19.85, 1.15)	-10.75, (-24.07, 2.57)		124.76, (114.28, 135.24)	143.91, (137.14, 150.68)	135.74, (127.89, 143.59)	127.06, (119.93, 134.19)	148.59, (139.54, 157.64)
SDG, non-smoked oily fish	-9.18, (-24.42, 6.06)	-11.74, (-21.75, -1.73)	-11.51, (-23.09, 0.07)	-11.44, (-22.0, -0.88)	-12.67, (-26.0, 0.66)		123.24, (112.65, 133.83)	142.07, (135.28, 148.86)	133.8, (125.92, 141.68)	124.97, (117.76, 132.18)	146.68, (137.62, 155.74)
Max red meat 60g/day, non-smoked oily fish	-8.8, (-24.05, 6.45)	-11.37, (-21.39, -1.35)	-11.14, (-22.72, 0.44)	-11.1, (-21.67, -0.53)	-12.37, (-25.7, 0.96)		123.61, (113.01, 134.21)	142.44, (135.64, 149.24)	134.17, (126.29, 142.05)	125.31, (118.08, 132.54)	146.98, (137.93, 156.03)
Max red meat 31g/day, non-smoked oily fish	-7.31, (-22.57, 7.95)	-9.92, (-19.96, 0.12)	-9.6, (-21.18, 1.98)	-9.63, (-20.24, 0.98)	-11.0, (-24.31, 2.31)		125.1, (114.48, 135.72)	143.89, (137.05, 150.73)	135.71, (127.83, 143.59)	126.78, (119.5, 134.06)	148.34, (139.31, 157.37)
CCC 2030, plant-based meat alternatives	-11.84, (-26.94, 3.26)	-13.8, (-23.77, -3.83)	-13.6, (-25.19, -2.01)	-13.37, (-23.87, -2.87)	-14.43, (-27.78, -1.08)		120.57, (110.18, 130.96)	140.01, (133.28, 146.74)	131.71, (123.82, 139.6)	123.03, (115.91, 130.15)	144.91, (135.82, 154.0)
CCC 2050, plant-based meat alternatives	-12.25, (-27.36, 2.86)	-14.18, (-24.15, -4.21)	-13.98, (-25.58, -2.38)	-13.77, (-24.27, -3.27)	-14.76, (-28.12, -1.4)		120.17, (109.76, 130.58)	139.63, (132.9, 146.36)	131.33, (123.43, 139.23)	122.64, (115.51, 129.77)	144.58, (135.48, 153.68)
SDG, plant-based meat alternatives	-11.78, (-26.89, 3.33)	-13.71, (-23.67, -3.75)	-13.47, (-25.05, -1.89)	-13.25, (-23.73, -2.77)	-14.33, (-27.69, -0.97)		120.63, (110.23, 131.03)	140.1, (133.38, 146.82)	131.84, (123.96, 139.72)	123.15, (116.06, 130.24)	145.02, (135.92, 154.12)
Max red meat 60g/day, plant-based meat alternatives	-11.91, (-27.03, 3.21)	-13.82, (-23.78, -3.86)	-13.57, (-25.16, -1.98)	-13.37, (-23.85, -2.89)	-14.41, (-27.77, -1.05)		120.51, (110.09, 130.93)	139.99, (133.27, 146.71)	131.74, (123.86, 139.62)	123.03, (115.94, 130.12)	144.94, (135.84, 154.04)
Max red meat 31g/day, plant-based meat alternatives	-12.42, (-27.57, 2.73)	-14.26, (-24.22, -4.3)	-14.01, (-25.61, -2.41)	-13.88, (-24.36, -3.4)	-14.76, (-28.12, -1.4)		119.99, (109.53, 130.45)	139.55, (132.83, 146.27)	131.31, (123.41, 139.21)	122.53, (115.44, 129.62)	144.58, (135.47, 153.69)
SDG, chicken	-11.35, (-26.48, 3.78)	-13.39, (-23.36, -3.42)	-13.15, (-24.73, -1.57)	-12.95, (-23.44, -2.46)	-14.05, (-27.4, -0.7)		121.06, (110.63, 131.49)	140.42, (133.69, 147.15)	132.16, (124.28, 140.04)	123.45, (116.34, 130.56)	145.29, (136.2, 154.38)
Max red meat 60g/day, chicken	-11.4, (-26.54, 3.74)	-13.41, (-23.38, -3.44)	-13.17, (-24.75, -1.59)	-13.0, (-23.49, -2.51)	-14.07, (-27.42, -0.72)		121.02, (110.58, 131.46)	140.39, (133.66, 147.12)	132.14, (124.26, 140.02)	123.41, (116.3, 130.52)	145.27, (136.18, 154.36)
Max red meat 31g/day, chicken	-11.58, (-26.74, 3.58)	-13.55, (-23.52, -3.58)	-13.28, (-24.87, -1.69)	-13.18, (-23.68, -2.68)	-14.14, (-27.49, -0.79)		120.83, (110.35, 131.31)	140.26, (133.53, 146.99)	132.03, (124.14, 139.92)	123.22, (116.11, 130.33)	145.2, (136.1, 154.3)

## Sheet: Selenium
	Change in Selenium, ug, (95% UI), SIMD 1 (most deprived)	Change in Selenium, ug, (95% UI), SIMD 2	Change in Selenium, ug, (95% UI), SIMD 3	Change in Selenium, ug, (95% UI), SIMD 4	Change in Selenium, ug, (95% UI), SIMD 5 (least deprived)		Selenium, ug, (95% UI), SIMD 1 (most deprived)	Selenium, ug, (95% UI), SIMD 2	Selenium, ug, (95% UI), SIMD 3	Selenium, ug, (95% UI), SIMD 4	Selenium, ug, (95% UI), SIMD 5 (least deprived)
Baseline							39.59, (35.71, 43.47)	43.05, (41.27, 44.83)	40.72, (38.51, 42.93)	39.92, (38.28, 41.56)	44.53, (42.5, 46.56)
CCC 2030	-2.79, (-8.18, 2.6)	-2.72, (-5.19, -0.25)	-2.85, (-5.88, 0.18)	-2.8, (-5.08, -0.52)	-2.74, (-5.54, 0.06)		36.79, (33.05, 40.53)	40.33, (38.61, 42.05)	37.86, (35.78, 39.94)	37.12, (35.54, 38.7)	41.79, (39.86, 43.72)
CCC 2050	-4.41, (-9.72, 0.9)	-4.21, (-6.66, -1.76)	-4.41, (-7.39, -1.43)	-4.36, (-6.62, -2.1)	-4.15, (-6.92, -1.38)		35.18, (31.55, 38.81)	38.84, (37.15, 40.53)	36.31, (34.32, 38.3)	35.56, (34.0, 37.12)	40.38, (38.5, 42.26)
SDG	-2.46, (-7.81, 2.89)	-2.07, (-4.57, 0.43)	-2.18, (-5.25, 0.89)	-1.96, (-4.27, 0.35)	-1.99, (-4.81, 0.83)		37.13, (33.44, 40.82)	40.98, (39.21, 42.75)	38.54, (36.4, 40.68)	37.96, (36.33, 39.59)	42.54, (40.58, 44.5)
Max red meat 60g/day	-2.82, (-8.16, 2.52)	-2.39, (-4.9, 0.12)	-2.51, (-5.57, 0.55)	-2.26, (-4.58, 0.06)	-2.23, (-5.05, 0.59)		36.77, (33.1, 40.44)	40.66, (38.89, 42.43)	38.21, (36.1, 40.32)	37.66, (36.02, 39.3)	42.29, (40.33, 44.25)
Max red meat 31g/day	-4.2, (-9.53, 1.13)	-3.66, (-6.17, -1.15)	-3.84, (-6.86, -0.82)	-3.56, (-5.9, -1.22)	-3.37, (-6.2, -0.54)		35.39, (31.74, 39.04)	39.39, (37.61, 41.17)	36.88, (34.82, 38.94)	36.36, (34.69, 38.03)	41.16, (39.19, 43.13)
CCC 2030, pulses & legumes	-1.9, (-7.31, 3.51)	-1.76, (-4.24, 0.72)	-1.91, (-4.97, 1.15)	-1.86, (-4.15, 0.43)	-1.8, (-4.61, 1.01)		37.69, (33.93, 41.45)	41.29, (39.56, 43.02)	38.81, (36.7, 40.92)	38.06, (36.47, 39.65)	42.73, (40.78, 44.68)
CCC 2050, pulses & legumes	-3.17, (-8.51, 2.17)	-2.92, (-5.38, -0.46)	-3.12, (-6.13, -0.11)	-3.08, (-5.35, -0.81)	-2.9, (-5.68, -0.12)		36.42, (32.75, 40.09)	40.13, (38.42, 41.84)	37.6, (35.57, 39.63)	36.84, (35.27, 38.41)	41.63, (39.73, 43.53)
SDG, pulses & legumes	-1.57, (-6.95, 3.81)	-1.2, (-3.71, 1.31)	-1.34, (-4.43, 1.75)	-1.15, (-3.46, 1.16)	-1.16, (-3.99, 1.67)		38.02, (34.3, 41.74)	41.86, (40.09, 43.63)	39.38, (37.23, 41.53)	38.77, (37.14, 40.4)	43.37, (41.4, 45.34)
Max red meat 60g/day, pulses & legumes	-1.84, (-7.21, 3.53)	-1.43, (-3.94, 1.08)	-1.58, (-4.65, 1.49)	-1.37, (-3.68, 0.94)	-1.33, (-4.16, 1.5)		37.75, (34.04, 41.46)	41.62, (39.85, 43.39)	39.14, (37.01, 41.27)	38.55, (36.92, 40.18)	43.2, (41.23, 45.17)
Max red meat 31g/day, pulses & legumes	-2.86, (-8.21, 2.49)	-2.36, (-4.87, 0.15)	-2.55, (-5.59, 0.49)	-2.31, (-4.63, 0.01)	-2.16, (-4.99, 0.67)		36.73, (33.05, 40.41)	40.7, (38.93, 42.47)	38.17, (36.08, 40.26)	37.61, (35.96, 39.26)	42.37, (40.39, 44.35)
CCC 2030, vegetables	-2.22, (-7.61, 3.17)	-2.05, (-4.53, 0.43)	-2.21, (-5.26, 0.84)	-2.17, (-4.45, 0.11)	-2.07, (-4.87, 0.73)		37.37, (33.62, 41.12)	41.0, (39.27, 42.73)	38.51, (36.42, 40.6)	37.76, (36.17, 39.35)	42.46, (40.52, 44.4)
CCC 2050, vegetables	-3.72, (-9.05, 1.61)	-3.44, (-5.9, -0.98)	-3.65, (-6.64, -0.66)	-3.61, (-5.87, -1.35)	-3.38, (-6.15, -0.61)		35.87, (32.22, 39.52)	39.62, (37.92, 41.32)	37.07, (35.06, 39.08)	36.31, (34.75, 37.87)	41.15, (39.26, 43.04)
SDG, vegetables	-1.88, (-7.24, 3.48)	-1.43, (-3.94, 1.08)	-1.57, (-4.65, 1.51)	-1.37, (-3.68, 0.94)	-1.35, (-4.17, 1.47)		37.71, (34.01, 41.41)	41.62, (39.85, 43.39)	39.15, (37.0, 41.3)	38.55, (36.92, 40.18)	43.17, (41.21, 45.13)
Max red meat 60g/day, vegetables	-2.21, (-7.56, 3.14)	-1.72, (-4.23, 0.79)	-1.87, (-4.94, 1.2)	-1.64, (-3.96, 0.68)	-1.58, (-4.4, 1.24)		37.38, (33.69, 41.07)	41.33, (39.56, 43.1)	38.85, (36.72, 40.98)	38.28, (36.64, 39.92)	42.95, (40.99, 44.91)
Max red meat 31g/day, vegetables	-3.47, (-8.8, 1.86)	-2.88, (-5.39, -0.37)	-3.08, (-6.11, -0.05)	-2.82, (-5.15, -0.49)	-2.61, (-5.44, 0.22)		36.12, (32.46, 39.78)	40.18, (38.4, 41.96)	37.64, (35.57, 39.71)	37.1, (35.44, 38.76)	41.92, (39.95, 43.89)
CCC 2030, egg	1.8, (-3.76, 7.36)	1.69, (-0.85, 4.23)	1.65, (-1.54, 4.84)	1.7, (-0.64, 4.04)	1.44, (-1.46, 4.34)		41.39, (37.4, 45.38)	44.75, (42.93, 46.57)	42.36, (40.07, 44.65)	41.62, (39.94, 43.3)	45.97, (43.89, 48.05)
CCC 2050, egg	3.32, (-2.3, 8.94)	3.12, (0.56, 5.68)	3.09, (-0.14, 6.32)	3.16, (0.79, 5.53)	2.76, (-0.18, 5.7)		42.91, (38.85, 46.97)	46.18, (44.33, 48.03)	43.81, (41.45, 46.17)	43.08, (41.36, 44.8)	47.29, (45.16, 49.42)
SDG, egg	2.11, (-3.57, 7.79)	1.58, (-0.99, 4.15)	1.43, (-1.76, 4.62)	1.41, (-0.97, 3.79)	1.19, (-1.74, 4.12)		41.7, (37.55, 45.85)	44.64, (42.78, 46.5)	42.15, (39.84, 44.46)	41.33, (39.6, 43.06)	45.72, (43.61, 47.83)
Max red meat 60g/day, egg	2.55, (-3.14, 8.24)	2.03, (-0.55, 4.61)	1.85, (-1.36, 5.06)	1.84, (-0.55, 4.23)	1.55, (-1.39, 4.49)		42.14, (37.98, 46.3)	45.08, (43.21, 46.95)	42.57, (40.24, 44.9)	41.76, (40.01, 43.51)	46.08, (43.96, 48.2)
Max red meat 31g/day, egg	4.36, (-1.34, 10.06)	3.77, (1.17, 6.37)	3.67, (0.41, 6.93)	3.69, (1.25, 6.13)	3.14, (0.19, 6.09)		43.95, (39.77, 48.13)	46.82, (44.91, 48.73)	44.38, (41.99, 46.77)	43.61, (41.8, 45.42)	47.67, (45.53, 49.81)
CCC 2030, non-smoked oily fish	1.52, (-4.03, 7.07)	1.42, (-1.11, 3.95)	1.37, (-1.8, 4.54)	1.43, (-0.91, 3.77)	1.19, (-1.71, 4.09)		41.1, (37.13, 45.07)	44.48, (42.67, 46.29)	42.09, (39.81, 44.37)	41.35, (39.68, 43.02)	45.71, (43.64, 47.78)
CCC 2050, non-smoked oily fish	2.82, (-2.77, 8.41)	2.65, (0.1, 5.2)	2.61, (-0.6, 5.82)	2.67, (0.31, 5.03)	2.32, (-0.61, 5.25)		42.41, (38.38, 46.44)	45.71, (43.88, 47.54)	43.33, (41.0, 45.66)	42.59, (40.89, 44.29)	46.85, (44.74, 48.96)
SDG, non-smoked oily fish	1.82, (-3.83, 7.47)	1.37, (-1.19, 3.93)	1.22, (-1.96, 4.4)	1.21, (-1.16, 3.58)	1.01, (-1.91, 3.93)		41.41, (37.3, 45.52)	44.42, (42.57, 46.27)	41.93, (39.64, 44.22)	41.13, (39.42, 42.84)	45.54, (43.44, 47.64)
Max red meat 60g/day, non-smoked oily fish	2.21, (-3.45, 7.87)	1.76, (-0.81, 4.33)	1.59, (-1.6, 4.78)	1.59, (-0.79, 3.97)	1.32, (-1.6, 4.24)		41.8, (37.68, 45.92)	44.81, (42.95, 46.67)	42.3, (40.0, 44.6)	41.51, (39.79, 43.23)	45.85, (43.74, 47.96)
Max red meat 31g/day, non-smoked oily fish	3.79, (-1.87, 9.45)	3.29, (0.7, 5.88)	3.18, (-0.05, 6.41)	3.22, (0.8, 5.64)	2.73, (-0.21, 5.67)		43.38, (39.25, 47.51)	46.34, (44.46, 48.22)	43.9, (41.54, 46.26)	43.14, (41.36, 44.92)	47.26, (45.14, 49.38)
CCC 2030, plant-based meat alternatives	-1.69, (-7.1, 3.72)	-1.57, (-4.06, 0.92)	-1.71, (-4.77, 1.35)	-1.66, (-3.95, 0.63)	-1.61, (-4.42, 1.2)		37.9, (34.12, 41.68)	41.49, (39.75, 43.23)	39.01, (36.89, 41.13)	38.26, (36.66, 39.86)	42.91, (40.96, 44.86)
CCC 2050, plant-based meat alternatives	-2.8, (-8.16, 2.56)	-2.58, (-5.05, -0.11)	-2.77, (-5.79, 0.25)	-2.73, (-5.0, -0.46)	-2.58, (-5.37, 0.21)		36.79, (33.1, 40.48)	40.47, (38.76, 42.18)	37.95, (35.9, 40.0)	37.19, (35.62, 38.76)	41.95, (40.04, 43.86)
SDG, plant-based meat alternatives	-1.36, (-6.75, 4.03)	-1.04, (-3.55, 1.47)	-1.18, (-4.27, 1.91)	-1.01, (-3.32, 1.3)	-1.02, (-3.85, 1.81)		38.23, (34.49, 41.97)	42.02, (40.25, 43.79)	39.54, (37.38, 41.7)	38.91, (37.28, 40.54)	43.51, (41.53, 45.49)
Max red meat 60g/day, plant-based meat alternatives	-1.59, (-6.97, 3.79)	-1.24, (-3.75, 1.27)	-1.38, (-4.46, 1.7)	-1.19, (-3.5, 1.12)	-1.17, (-4.0, 1.66)		38.0, (34.27, 41.73)	41.82, (40.05, 43.59)	39.33, (37.19, 41.47)	38.73, (37.1, 40.36)	43.36, (41.38, 45.34)
Max red meat 31g/day, plant-based meat alternatives	-2.45, (-7.81, 2.91)	-2.01, (-4.52, 0.5)	-2.2, (-5.25, 0.85)	-1.97, (-4.29, 0.35)	-1.86, (-4.69, 0.97)		37.14, (33.44, 40.84)	41.04, (39.27, 42.81)	38.52, (36.43, 40.61)	37.95, (36.31, 39.59)	42.67, (40.69, 44.65)
SDG, chicken	0.67, (-4.87, 6.21)	0.5, (-2.03, 3.03)	0.35, (-2.79, 3.49)	0.41, (-1.92, 2.74)	0.27, (-2.61, 3.15)		40.26, (36.31, 44.21)	43.55, (41.75, 45.35)	41.07, (38.84, 43.3)	40.33, (38.67, 41.99)	44.8, (42.76, 46.84)
Max red meat 60g/day, chicken	0.83, (-4.71, 6.37)	0.67, (-1.86, 3.2)	0.51, (-2.63, 3.65)	0.58, (-1.75, 2.91)	0.42, (-2.46, 3.3)		40.42, (36.47, 44.37)	43.73, (41.93, 45.53)	41.23, (39.0, 43.46)	40.5, (38.84, 42.16)	44.95, (42.9, 47.0)
Max red meat 31g/day, chicken	1.53, (-4.0, 7.06)	1.37, (-1.16, 3.9)	1.23, (-1.91, 4.37)	1.34, (-1.0, 3.68)	1.07, (-1.81, 3.95)		41.12, (37.18, 45.06)	44.42, (42.61, 46.23)	41.95, (39.71, 44.19)	41.26, (39.58, 42.94)	45.59, (43.54, 47.64)

## Sheet: Zinc
	Change in Zinc, mg, (95% UI), SIMD 1 (most deprived)	Change in Zinc, mg, (95% UI), SIMD 2	Change in Zinc, mg, (95% UI), SIMD 3	Change in Zinc, mg, (95% UI), SIMD 4	Change in Zinc, mg, (95% UI), SIMD 5 (least deprived)		Zinc, mg, (95% UI), SIMD 1 (most deprived)	Zinc, mg, (95% UI), SIMD 2	Zinc, mg, (95% UI), SIMD 3	Zinc, mg, (95% UI), SIMD 4	Zinc, mg, (95% UI), SIMD 5 (least deprived)
Baseline							7.26, (6.83, 7.69)	7.78, (7.51, 8.05)	7.74, (7.43, 8.05)	7.49, (7.13, 7.85)	8.21, (7.9, 8.52)
CCC 2030	-0.67, (-1.27, -0.07)	-0.73, (-1.1, -0.36)	-0.73, (-1.15, -0.31)	-0.71, (-1.2, -0.22)	-0.72, (-1.14, -0.3)		6.58, (6.17, 6.99)	7.04, (6.79, 7.29)	7.01, (6.73, 7.29)	6.78, (6.45, 7.11)	7.49, (7.21, 7.77)
CCC 2050	-0.97, (-1.56, -0.38)	-1.04, (-1.4, -0.68)	-1.01, (-1.42, -0.6)	-0.98, (-1.46, -0.5)	-0.98, (-1.39, -0.57)		6.29, (5.89, 6.69)	6.74, (6.5, 6.98)	6.73, (6.46, 7.0)	6.5, (6.18, 6.82)	7.23, (6.96, 7.5)
SDG	-0.78, (-1.36, -0.2)	-0.76, (-1.12, -0.4)	-0.73, (-1.15, -0.31)	-0.71, (-1.18, -0.24)	-0.71, (-1.12, -0.3)		6.47, (6.08, 6.86)	7.02, (6.79, 7.25)	7.01, (6.73, 7.29)	6.78, (6.47, 7.09)	7.5, (7.23, 7.77)
Max red meat 60g/day	-0.88, (-1.46, -0.3)	-0.86, (-1.22, -0.5)	-0.82, (-1.23, -0.41)	-0.81, (-1.28, -0.34)	-0.78, (-1.19, -0.37)		6.37, (5.99, 6.75)	6.91, (6.68, 7.14)	6.92, (6.65, 7.19)	6.68, (6.38, 6.98)	7.42, (7.16, 7.68)
Max red meat 31g/day	-1.28, (-1.86, -0.7)	-1.29, (-1.64, -0.94)	-1.23, (-1.63, -0.83)	-1.22, (-1.69, -0.75)	-1.15, (-1.55, -0.75)		5.98, (5.6, 6.36)	6.49, (6.26, 6.72)	6.51, (6.25, 6.77)	6.27, (5.97, 6.57)	7.06, (6.8, 7.32)
CCC 2030, pulses & legumes	-0.45, (-1.06, 0.16)	-0.5, (-0.87, -0.13)	-0.5, (-0.92, -0.08)	-0.48, (-0.97, 0.01)	-0.49, (-0.91, -0.07)		6.81, (6.38, 7.24)	7.27, (7.02, 7.52)	7.24, (6.95, 7.53)	7.01, (6.67, 7.35)	7.72, (7.43, 8.01)
CCC 2050, pulses & legumes	-0.64, (-1.25, -0.03)	-0.71, (-1.08, -0.34)	-0.69, (-1.11, -0.27)	-0.66, (-1.15, -0.17)	-0.67, (-1.09, -0.25)		6.61, (6.19, 7.03)	7.06, (6.81, 7.31)	7.05, (6.77, 7.33)	6.83, (6.5, 7.16)	7.54, (7.26, 7.82)
SDG, pulses & legumes	-0.56, (-1.15, 0.03)	-0.55, (-0.92, -0.18)	-0.53, (-0.95, -0.11)	-0.52, (-1.0, -0.04)	-0.51, (-0.92, -0.1)		6.7, (6.3, 7.1)	7.23, (6.99, 7.47)	7.21, (6.93, 7.49)	6.97, (6.65, 7.29)	7.7, (7.42, 7.98)
Max red meat 60g/day, pulses & legumes	-0.63, (-1.22, -0.04)	-0.63, (-0.99, -0.27)	-0.6, (-1.02, -0.18)	-0.59, (-1.07, -0.11)	-0.57, (-0.98, -0.16)		6.62, (6.22, 7.02)	7.14, (6.9, 7.38)	7.14, (6.86, 7.42)	6.89, (6.58, 7.2)	7.64, (7.37, 7.91)
Max red meat 31g/day, pulses & legumes	-0.93, (-1.52, -0.34)	-0.96, (-1.32, -0.6)	-0.91, (-1.32, -0.5)	-0.9, (-1.37, -0.43)	-0.85, (-1.26, -0.44)		6.33, (5.92, 6.74)	6.82, (6.59, 7.05)	6.83, (6.56, 7.1)	6.58, (6.27, 6.89)	7.36, (7.09, 7.63)
CCC 2030, vegetables	-0.53, (-1.13, 0.07)	-0.57, (-0.94, -0.2)	-0.57, (-0.99, -0.15)	-0.55, (-1.04, -0.06)	-0.56, (-0.98, -0.14)		6.73, (6.31, 7.15)	7.2, (6.95, 7.45)	7.17, (6.88, 7.46)	6.94, (6.61, 7.27)	7.65, (7.36, 7.94)
CCC 2050, vegetables	-0.78, (-1.38, -0.18)	-0.84, (-1.2, -0.48)	-0.82, (-1.24, -0.4)	-0.79, (-1.27, -0.31)	-0.78, (-1.19, -0.37)		6.48, (6.07, 6.89)	6.94, (6.7, 7.18)	6.92, (6.64, 7.2)	6.7, (6.38, 7.02)	7.42, (7.14, 7.7)
SDG, vegetables	-0.64, (-1.23, -0.05)	-0.61, (-0.97, -0.25)	-0.58, (-1.0, -0.16)	-0.57, (-1.05, -0.09)	-0.56, (-0.97, -0.15)		6.62, (6.23, 7.01)	7.17, (6.93, 7.41)	7.16, (6.88, 7.44)	6.92, (6.61, 7.23)	7.65, (7.38, 7.92)
Max red meat 60g/day, vegetables	-0.72, (-1.3, -0.14)	-0.7, (-1.06, -0.34)	-0.67, (-1.08, -0.26)	-0.66, (-1.13, -0.19)	-0.63, (-1.04, -0.22)		6.53, (6.14, 6.92)	7.07, (6.83, 7.31)	7.07, (6.79, 7.35)	6.83, (6.52, 7.14)	7.58, (7.31, 7.85)
Max red meat 31g/day, vegetables	-1.08, (-1.67, -0.49)	-1.09, (-1.45, -0.73)	-1.04, (-1.45, -0.63)	-1.03, (-1.5, -0.56)	-0.96, (-1.37, -0.55)		6.18, (5.79, 6.57)	6.69, (6.46, 6.92)	6.7, (6.43, 6.97)	6.46, (6.16, 6.76)	7.25, (6.99, 7.51)
CCC 2030, egg	-0.38, (-0.99, 0.23)	-0.44, (-0.81, -0.07)	-0.43, (-0.86, -0.0)	-0.41, (-0.9, 0.08)	-0.43, (-0.86, -0.0)		6.88, (6.45, 7.31)	7.34, (7.09, 7.59)	7.31, (7.02, 7.6)	7.08, (6.74, 7.42)	7.78, (7.49, 8.07)
CCC 2050, egg	-0.52, (-1.13, 0.09)	-0.6, (-0.97, -0.23)	-0.57, (-0.99, -0.15)	-0.54, (-1.03, -0.05)	-0.56, (-0.98, -0.14)		6.73, (6.29, 7.17)	7.18, (6.93, 7.43)	7.17, (6.88, 7.46)	6.94, (6.61, 7.27)	7.65, (7.36, 7.94)
SDG, egg	-0.49, (-1.09, 0.11)	-0.5, (-0.87, -0.13)	-0.47, (-0.89, -0.05)	-0.47, (-0.95, 0.01)	-0.47, (-0.89, -0.05)		6.76, (6.35, 7.17)	7.28, (7.03, 7.53)	7.27, (6.98, 7.56)	7.02, (6.7, 7.34)	7.74, (7.46, 8.02)
Max red meat 60g/day, egg	-0.55, (-1.15, 0.05)	-0.57, (-0.94, -0.2)	-0.54, (-0.96, -0.12)	-0.53, (-1.01, -0.05)	-0.52, (-0.94, -0.1)		6.71, (6.3, 7.12)	7.21, (6.97, 7.45)	7.2, (6.92, 7.48)	6.95, (6.63, 7.27)	7.69, (7.41, 7.97)
Max red meat 31g/day, egg	-0.79, (-1.39, -0.19)	-0.85, (-1.21, -0.49)	-0.79, (-1.2, -0.38)	-0.79, (-1.27, -0.31)	-0.75, (-1.16, -0.34)		6.46, (6.04, 6.88)	6.93, (6.69, 7.17)	6.95, (6.68, 7.22)	6.7, (6.39, 7.01)	7.46, (7.19, 7.73)
CCC 2030, non-smoked oily fish	-0.47, (-1.08, 0.14)	-0.52, (-0.89, -0.15)	-0.51, (-0.93, -0.09)	-0.49, (-0.98, 0.0)	-0.51, (-0.93, -0.09)		6.79, (6.36, 7.22)	7.26, (7.01, 7.51)	7.23, (6.94, 7.52)	6.99, (6.66, 7.32)	7.7, (7.41, 7.99)
CCC 2050, non-smoked oily fish	-0.68, (-1.28, -0.08)	-0.74, (-1.11, -0.37)	-0.72, (-1.14, -0.3)	-0.69, (-1.17, -0.21)	-0.69, (-1.11, -0.27)		6.58, (6.16, 7.0)	7.03, (6.79, 7.27)	7.02, (6.74, 7.3)	6.8, (6.47, 7.13)	7.51, (7.23, 7.79)
SDG, non-smoked oily fish	-0.58, (-1.17, 0.01)	-0.56, (-0.92, -0.2)	-0.54, (-0.96, -0.12)	-0.53, (-1.01, -0.05)	-0.52, (-0.93, -0.11)		6.68, (6.28, 7.08)	7.21, (6.97, 7.45)	7.2, (6.92, 7.48)	6.96, (6.64, 7.28)	7.68, (7.4, 7.96)
Max red meat 60g/day, non-smoked oily fish	-0.65, (-1.24, -0.06)	-0.65, (-1.01, -0.29)	-0.62, (-1.04, -0.2)	-0.61, (-1.09, -0.13)	-0.59, (-1.0, -0.18)		6.6, (6.2, 7.0)	7.13, (6.89, 7.37)	7.12, (6.84, 7.4)	6.88, (6.57, 7.19)	7.62, (7.35, 7.89)
Max red meat 31g/day, non-smoked oily fish	-0.96, (-1.55, -0.37)	-0.99, (-1.35, -0.63)	-0.94, (-1.35, -0.53)	-0.93, (-1.4, -0.46)	-0.87, (-1.28, -0.46)		6.29, (5.89, 6.69)	6.79, (6.56, 7.02)	6.8, (6.53, 7.07)	6.55, (6.24, 6.86)	7.34, (7.07, 7.61)
CCC 2030, plant-based meat alternatives	-0.04, (-0.68, 0.6)	-0.12, (-0.5, 0.26)	-0.1, (-0.54, 0.34)	-0.08, (-0.58, 0.42)	-0.13, (-0.57, 0.31)		7.22, (6.75, 7.69)	7.66, (7.4, 7.92)	7.64, (7.33, 7.95)	7.41, (7.07, 7.75)	8.08, (7.77, 8.39)
CCC 2050, plant-based meat alternatives	0.08, (-0.58, 0.74)	-0.04, (-0.42, 0.34)	0.0, (-0.44, 0.44)	0.03, (-0.46, 0.52)	-0.04, (-0.48, 0.4)		7.33, (6.84, 7.82)	7.73, (7.47, 7.99)	7.74, (7.42, 8.06)	7.52, (7.18, 7.86)	8.17, (7.85, 8.49)
SDG, plant-based meat alternatives	-0.15, (-0.79, 0.49)	-0.24, (-0.62, 0.14)	-0.22, (-0.66, 0.22)	-0.23, (-0.73, 0.27)	-0.25, (-0.68, 0.18)		7.1, (6.64, 7.56)	7.53, (7.26, 7.8)	7.52, (7.21, 7.83)	7.25, (6.9, 7.6)	7.96, (7.66, 8.26)
Max red meat 60g/day, plant-based meat alternatives	-0.15, (-0.79, 0.49)	-0.25, (-0.63, 0.13)	-0.22, (-0.66, 0.22)	-0.24, (-0.74, 0.26)	-0.25, (-0.68, 0.18)		7.11, (6.64, 7.58)	7.53, (7.26, 7.8)	7.52, (7.21, 7.83)	7.25, (6.9, 7.6)	7.96, (7.66, 8.26)
Max red meat 31g/day, plant-based meat alternatives	-0.13, (-0.79, 0.53)	-0.28, (-0.66, 0.1)	-0.22, (-0.66, 0.22)	-0.24, (-0.75, 0.27)	-0.26, (-0.69, 0.17)		7.13, (6.64, 7.62)	7.5, (7.23, 7.77)	7.52, (7.21, 7.83)	7.25, (6.89, 7.61)	7.95, (7.65, 8.25)
SDG, chicken	-0.56, (-1.15, 0.03)	-0.55, (-0.92, -0.18)	-0.52, (-0.94, -0.1)	-0.52, (-1.0, -0.04)	-0.51, (-0.92, -0.1)		6.7, (6.3, 7.1)	7.23, (6.99, 7.47)	7.22, (6.94, 7.5)	6.97, (6.65, 7.29)	7.7, (7.42, 7.98)
Max red meat 60g/day, chicken	-0.63, (-1.22, -0.04)	-0.63, (-0.99, -0.27)	-0.6, (-1.02, -0.18)	-0.59, (-1.07, -0.11)	-0.57, (-0.98, -0.16)		6.63, (6.23, 7.03)	7.15, (6.91, 7.39)	7.14, (6.86, 7.42)	6.9, (6.59, 7.21)	7.64, (7.37, 7.91)
Max red meat 31g/day, chicken	-0.92, (-1.51, -0.33)	-0.96, (-1.32, -0.6)	-0.91, (-1.32, -0.5)	-0.9, (-1.37, -0.43)	-0.84, (-1.25, -0.43)		6.33, (5.92, 6.74)	6.82, (6.59, 7.05)	6.83, (6.56, 7.1)	6.59, (6.28, 6.9)	7.36, (7.09, 7.63)

## Sheet: Vitamin B12
	Change in Vitamin B12, ug, (95% UI), SIMD 1 (most deprived)	Change in Vitamin B12, ug, (95% UI), SIMD 2	Change in Vitamin B12, ug, (95% UI), SIMD 3	Change in Vitamin B12, ug, (95% UI), SIMD 4	Change in Vitamin B12, ug, (95% UI), SIMD 5 (least deprived)		Vitamin B12, ug, (95% UI), SIMD 1 (most deprived)	Vitamin B12, ug, (95% UI), SIMD 2	Vitamin B12, ug, (95% UI), SIMD 3	Vitamin B12, ug, (95% UI), SIMD 4	Vitamin B12, ug, (95% UI), SIMD 5 (least deprived)
Baseline							4.41, (3.71, 5.11)	4.63, (4.37, 4.89)	4.31, (4.06, 4.56)	4.41, (4.03, 4.79)	4.78, (4.48, 5.08)
CCC 2030	-0.57, (-1.49, 0.35)	-0.57, (-0.91, -0.23)	-0.56, (-0.9, -0.22)	-0.55, (-1.08, -0.02)	-0.59, (-0.99, -0.19)		3.84, (3.25, 4.43)	4.06, (3.83, 4.29)	3.75, (3.52, 3.98)	3.86, (3.5, 4.22)	4.19, (3.93, 4.45)
CCC 2050	-0.74, (-1.62, 0.14)	-0.71, (-1.05, -0.37)	-0.69, (-1.03, -0.35)	-0.67, (-1.19, -0.15)	-0.71, (-1.1, -0.32)		3.68, (3.15, 4.21)	3.92, (3.69, 4.15)	3.62, (3.39, 3.85)	3.74, (3.38, 4.1)	4.06, (3.81, 4.31)
SDG	-0.62, (-1.53, 0.29)	-0.6, (-0.94, -0.26)	-0.57, (-0.91, -0.23)	-0.59, (-1.11, -0.07)	-0.62, (-1.01, -0.23)		3.79, (3.21, 4.37)	4.03, (3.8, 4.26)	3.74, (3.51, 3.97)	3.82, (3.47, 4.17)	4.16, (3.91, 4.41)
Max red meat 60g/day	-0.7, (-1.58, 0.18)	-0.65, (-0.99, -0.31)	-0.61, (-0.95, -0.27)	-0.64, (-1.16, -0.12)	-0.67, (-1.05, -0.29)		3.72, (3.18, 4.26)	3.98, (3.76, 4.2)	3.7, (3.47, 3.93)	3.77, (3.42, 4.12)	4.11, (3.87, 4.35)
Max red meat 31g/day	-0.98, (-1.8, -0.16)	-0.85, (-1.19, -0.51)	-0.8, (-1.14, -0.46)	-0.83, (-1.34, -0.32)	-0.85, (-1.22, -0.48)		3.43, (3.01, 3.85)	3.78, (3.56, 4.0)	3.51, (3.28, 3.74)	3.58, (3.23, 3.93)	3.92, (3.69, 4.15)
CCC 2030, pulses & legumes	-0.48, (-1.4, 0.44)	-0.47, (-0.82, -0.12)	-0.46, (-0.8, -0.12)	-0.46, (-0.99, 0.07)	-0.49, (-0.89, -0.09)		3.93, (3.33, 4.53)	4.16, (3.93, 4.39)	3.85, (3.62, 4.08)	3.95, (3.59, 4.31)	4.29, (4.03, 4.55)
CCC 2050, pulses & legumes	-0.65, (-1.53, 0.23)	-0.6, (-0.94, -0.26)	-0.58, (-0.92, -0.24)	-0.57, (-1.09, -0.05)	-0.61, (-1.0, -0.22)		3.77, (3.24, 4.3)	4.03, (3.8, 4.26)	3.73, (3.5, 3.96)	3.84, (3.48, 4.2)	4.17, (3.92, 4.42)
SDG, pulses & legumes	-0.54, (-1.45, 0.37)	-0.5, (-0.85, -0.15)	-0.47, (-0.82, -0.12)	-0.49, (-1.01, 0.03)	-0.52, (-0.91, -0.13)		3.88, (3.3, 4.46)	4.13, (3.9, 4.36)	3.84, (3.6, 4.08)	3.92, (3.57, 4.27)	4.26, (4.01, 4.51)
Max red meat 60g/day, pulses & legumes	-0.61, (-1.49, 0.27)	-0.55, (-0.89, -0.21)	-0.51, (-0.86, -0.16)	-0.54, (-1.06, -0.02)	-0.56, (-0.95, -0.17)		3.8, (3.26, 4.34)	4.08, (3.85, 4.31)	3.8, (3.57, 4.03)	3.87, (3.52, 4.22)	4.22, (3.98, 4.46)
Max red meat 31g/day, pulses & legumes	-0.89, (-1.71, -0.07)	-0.74, (-1.08, -0.4)	-0.69, (-1.04, -0.34)	-0.73, (-1.25, -0.21)	-0.75, (-1.13, -0.37)		3.52, (3.1, 3.94)	3.89, (3.67, 4.11)	3.62, (3.39, 3.85)	3.68, (3.33, 4.03)	4.03, (3.8, 4.26)
CCC 2030, vegetables	-0.49, (-1.41, 0.43)	-0.48, (-0.83, -0.13)	-0.47, (-0.81, -0.13)	-0.46, (-0.99, 0.07)	-0.49, (-0.89, -0.09)		3.93, (3.33, 4.53)	4.16, (3.93, 4.39)	3.84, (3.61, 4.07)	3.95, (3.59, 4.31)	4.29, (4.03, 4.55)
CCC 2050, vegetables	-0.66, (-1.54, 0.22)	-0.61, (-0.95, -0.27)	-0.59, (-0.93, -0.25)	-0.58, (-1.1, -0.06)	-0.61, (-1.0, -0.22)		3.76, (3.23, 4.29)	4.02, (3.79, 4.25)	3.72, (3.49, 3.95)	3.83, (3.47, 4.19)	4.16, (3.91, 4.41)
SDG, vegetables	-0.54, (-1.45, 0.37)	-0.5, (-0.85, -0.15)	-0.47, (-0.82, -0.12)	-0.5, (-1.02, 0.02)	-0.52, (-0.91, -0.13)		3.87, (3.29, 4.45)	4.13, (3.9, 4.36)	3.83, (3.59, 4.07)	3.91, (3.56, 4.26)	4.26, (4.01, 4.51)
Max red meat 60g/day, vegetables	-0.62, (-1.5, 0.26)	-0.55, (-0.89, -0.21)	-0.52, (-0.87, -0.17)	-0.55, (-1.07, -0.03)	-0.57, (-0.96, -0.18)		3.8, (3.26, 4.34)	4.08, (3.85, 4.31)	3.79, (3.56, 4.02)	3.86, (3.51, 4.21)	4.21, (3.97, 4.45)
Max red meat 31g/day, vegetables	-0.9, (-1.72, -0.08)	-0.75, (-1.09, -0.41)	-0.7, (-1.05, -0.35)	-0.74, (-1.26, -0.22)	-0.75, (-1.13, -0.37)		3.51, (3.09, 3.93)	3.88, (3.66, 4.1)	3.61, (3.38, 3.84)	3.67, (3.32, 4.02)	4.02, (3.79, 4.25)
CCC 2030, egg	-0.07, (-0.99, 0.85)	-0.09, (-0.44, 0.26)	-0.07, (-0.42, 0.28)	-0.07, (-0.6, 0.46)	-0.13, (-0.53, 0.27)		4.34, (3.74, 4.94)	4.54, (4.3, 4.78)	4.24, (4.0, 4.48)	4.35, (3.98, 4.72)	4.65, (4.38, 4.92)
CCC 2050, egg	0.07, (-0.81, 0.95)	0.07, (-0.28, 0.42)	0.11, (-0.24, 0.46)	0.11, (-0.43, 0.65)	0.02, (-0.38, 0.42)		4.48, (3.94, 5.02)	4.7, (4.46, 4.94)	4.41, (4.16, 4.66)	4.52, (4.14, 4.9)	4.8, (4.54, 5.06)
SDG, egg	-0.13, (-1.06, 0.8)	-0.19, (-0.54, 0.16)	-0.17, (-0.52, 0.18)	-0.21, (-0.75, 0.33)	-0.26, (-0.65, 0.13)		4.28, (3.67, 4.89)	4.44, (4.2, 4.68)	4.14, (3.89, 4.39)	4.2, (3.81, 4.59)	4.52, (4.26, 4.78)
Max red meat 60g/day, egg	-0.13, (-1.03, 0.77)	-0.17, (-0.52, 0.18)	-0.13, (-0.49, 0.23)	-0.19, (-0.73, 0.35)	-0.24, (-0.63, 0.15)		4.29, (3.72, 4.86)	4.46, (4.22, 4.7)	4.18, (3.93, 4.43)	4.22, (3.83, 4.61)	4.53, (4.27, 4.79)
Max red meat 31g/day, egg	-0.1, (-0.94, 0.74)	-0.06, (-0.41, 0.29)	-0.01, (-0.37, 0.35)	-0.07, (-0.62, 0.48)	-0.16, (-0.54, 0.22)		4.32, (3.86, 4.78)	4.57, (4.33, 4.81)	4.3, (4.05, 4.55)	4.34, (3.95, 4.73)	4.62, (4.38, 4.86)
CCC 2030, non-smoked oily fish	0.28, (-0.65, 1.21)	0.24, (-0.11, 0.59)	0.27, (-0.09, 0.63)	0.27, (-0.27, 0.81)	0.17, (-0.24, 0.58)		4.69, (4.09, 5.29)	4.87, (4.63, 5.11)	4.58, (4.32, 4.84)	4.68, (4.3, 5.06)	4.95, (4.68, 5.22)
CCC 2050, non-smoked oily fish	0.69, (-0.2, 1.58)	0.64, (0.28, 1.0)	0.7, (0.33, 1.07)	0.71, (0.16, 1.26)	0.55, (0.14, 0.96)		5.1, (4.55, 5.65)	5.27, (5.02, 5.52)	5.01, (4.73, 5.29)	5.12, (4.72, 5.52)	5.33, (5.05, 5.61)
SDG, non-smoked oily fish	0.22, (-0.74, 1.18)	0.08, (-0.29, 0.45)	0.1, (-0.27, 0.47)	0.03, (-0.54, 0.6)	-0.04, (-0.45, 0.37)		4.63, (3.98, 5.28)	4.71, (4.45, 4.97)	4.41, (4.14, 4.68)	4.44, (4.01, 4.87)	4.74, (4.46, 5.02)
Max red meat 60g/day, non-smoked oily fish	0.29, (-0.64, 1.22)	0.16, (-0.21, 0.53)	0.19, (-0.19, 0.57)	0.12, (-0.45, 0.69)	0.03, (-0.38, 0.44)		4.7, (4.09, 5.31)	4.79, (4.53, 5.05)	4.5, (4.22, 4.78)	4.53, (4.1, 4.96)	4.81, (4.53, 5.09)
Max red meat 31g/day, non-smoked oily fish	0.59, (-0.28, 1.46)	0.52, (0.14, 0.9)	0.59, (0.2, 0.98)	0.5, (-0.09, 1.09)	0.34, (-0.06, 0.74)		5.0, (4.48, 5.52)	5.15, (4.87, 5.43)	4.9, (4.6, 5.2)	4.91, (4.46, 5.36)	5.12, (4.85, 5.39)
CCC 2030, plant-based meat alternatives	-0.45, (-1.37, 0.47)	-0.44, (-0.79, -0.09)	-0.43, (-0.78, -0.08)	-0.43, (-0.96, 0.1)	-0.46, (-0.86, -0.06)		3.96, (3.36, 4.56)	4.19, (3.96, 4.42)	3.88, (3.65, 4.11)	3.98, (3.61, 4.35)	4.32, (4.06, 4.58)
CCC 2050, plant-based meat alternatives	-0.59, (-1.47, 0.29)	-0.55, (-0.89, -0.21)	-0.53, (-0.87, -0.19)	-0.52, (-1.04, 0.0)	-0.56, (-0.95, -0.17)		3.82, (3.29, 4.35)	4.08, (3.85, 4.31)	3.78, (3.55, 4.01)	3.89, (3.53, 4.25)	4.22, (3.97, 4.47)
SDG, plant-based meat alternatives	-0.5, (-1.41, 0.41)	-0.47, (-0.82, -0.12)	-0.45, (-0.8, -0.1)	-0.47, (-0.99, 0.05)	-0.5, (-0.89, -0.11)		3.91, (3.32, 4.5)	4.16, (3.93, 4.39)	3.86, (3.62, 4.1)	3.94, (3.58, 4.3)	4.28, (4.03, 4.53)
Max red meat 60g/day, plant-based meat alternatives	-0.57, (-1.46, 0.32)	-0.52, (-0.86, -0.18)	-0.48, (-0.83, -0.13)	-0.52, (-1.04, -0.0)	-0.54, (-0.93, -0.15)		3.84, (3.3, 4.38)	4.11, (3.88, 4.34)	3.83, (3.6, 4.06)	3.9, (3.55, 4.25)	4.24, (4.0, 4.48)
Max red meat 31g/day, plant-based meat alternatives	-0.83, (-1.65, -0.01)	-0.69, (-1.03, -0.35)	-0.64, (-0.99, -0.29)	-0.68, (-1.2, -0.16)	-0.7, (-1.08, -0.32)		3.58, (3.16, 4.0)	3.94, (3.72, 4.16)	3.67, (3.44, 3.9)	3.73, (3.38, 4.08)	4.08, (3.85, 4.31)
SDG, chicken	-0.54, (-1.45, 0.37)	-0.5, (-0.85, -0.15)	-0.47, (-0.82, -0.12)	-0.5, (-1.02, 0.02)	-0.52, (-0.91, -0.13)		3.87, (3.29, 4.45)	4.13, (3.9, 4.36)	3.83, (3.59, 4.07)	3.91, (3.56, 4.26)	4.26, (4.01, 4.51)
Max red meat 60g/day, chicken	-0.62, (-1.5, 0.26)	-0.55, (-0.89, -0.21)	-0.52, (-0.87, -0.17)	-0.55, (-1.07, -0.03)	-0.57, (-0.96, -0.18)		3.8, (3.26, 4.34)	4.08, (3.85, 4.31)	3.79, (3.56, 4.02)	3.86, (3.51, 4.21)	4.21, (3.97, 4.45)
Max red meat 31g/day, chicken	-0.9, (-1.72, -0.08)	-0.75, (-1.09, -0.41)	-0.7, (-1.05, -0.35)	-0.74, (-1.26, -0.22)	-0.75, (-1.13, -0.37)		3.51, (3.09, 3.93)	3.88, (3.66, 4.1)	3.61, (3.38, 3.84)	3.67, (3.32, 4.02)	4.02, (3.79, 4.25)

## Sheet: Fat
	Change in Fat, g, (95% UI), SIMD 1 (most deprived)	Change in Fat, g, (95% UI), SIMD 2	Change in Fat, g, (95% UI), SIMD 3	Change in Fat, g, (95% UI), SIMD 4	Change in Fat, g, (95% UI), SIMD 5 (least deprived)		Fat, g, (95% UI), SIMD 1 (most deprived)	Fat, g, (95% UI), SIMD 2	Fat, g, (95% UI), SIMD 3	Fat, g, (95% UI), SIMD 4	Fat, g, (95% UI), SIMD 5 (least deprived)
Baseline							60.06, (56.03, 64.09)	63.03, (60.65, 65.41)	62.97, (59.97, 65.97)	60.17, (57.15, 63.19)	65.74, (63.04, 68.44)
CCC 2030	-4.89, (-10.41, 0.63)	-4.92, (-8.19, -1.65)	-5.34, (-9.43, -1.25)	-4.84, (-8.95, -0.73)	-5.08, (-8.8, -1.36)		55.17, (51.4, 58.94)	58.11, (55.86, 60.36)	57.63, (54.86, 60.4)	55.33, (52.53, 58.13)	60.66, (58.11, 63.21)
CCC 2050	-6.11, (-11.61, -0.61)	-5.99, (-9.25, -2.73)	-6.49, (-10.56, -2.42)	-5.95, (-10.03, -1.87)	-6.09, (-9.77, -2.41)		53.94, (50.2, 57.68)	57.05, (54.82, 59.28)	56.48, (53.74, 59.22)	54.22, (51.47, 56.97)	59.65, (57.15, 62.15)
SDG	-5.28, (-10.73, 0.17)	-4.96, (-8.23, -1.69)	-5.52, (-9.56, -1.48)	-4.88, (-8.92, -0.84)	-5.14, (-8.8, -1.48)		54.78, (51.11, 58.45)	58.07, (55.83, 60.31)	57.44, (54.74, 60.14)	55.3, (52.62, 57.98)	60.6, (58.13, 63.07)
Max red meat 60g/day	-5.71, (-11.17, -0.25)	-5.31, (-8.57, -2.05)	-5.92, (-9.95, -1.89)	-5.25, (-9.26, -1.24)	-5.47, (-9.12, -1.82)		54.35, (50.67, 58.03)	57.72, (55.49, 59.95)	57.05, (54.37, 59.73)	54.92, (52.27, 57.57)	60.27, (57.82, 62.72)
Max red meat 31g/day	-7.4, (-12.89, -1.91)	-6.73, (-9.99, -3.47)	-7.55, (-11.57, -3.53)	-6.91, (-10.89, -2.93)	-6.87, (-10.49, -3.25)		52.66, (48.93, 56.39)	56.3, (54.08, 58.52)	55.42, (52.75, 58.09)	53.26, (50.66, 55.86)	58.87, (56.46, 61.28)
CCC 2030, pulses & legumes	-2.28, (-7.91, 3.35)	-2.3, (-5.6, 1.0)	-2.6, (-6.73, 1.53)	-2.33, (-6.49, 1.83)	-2.53, (-6.3, 1.24)		57.78, (53.85, 61.71)	60.73, (58.44, 63.02)	60.37, (57.54, 63.2)	57.85, (54.98, 60.72)	63.21, (60.59, 65.83)
CCC 2050, pulses & legumes	-2.69, (-8.31, 2.93)	-2.6, (-5.89, 0.69)	-2.97, (-7.08, 1.14)	-2.66, (-6.8, 1.48)	-2.82, (-6.58, 0.94)		57.36, (53.45, 61.27)	60.43, (58.15, 62.71)	59.99, (57.19, 62.79)	57.52, (54.69, 60.35)	62.92, (60.31, 65.53)
SDG, pulses & legumes	-2.68, (-8.28, 2.92)	-2.53, (-5.83, 0.77)	-3.02, (-7.11, 1.07)	-2.65, (-6.77, 1.47)	-2.85, (-6.57, 0.87)		57.38, (53.5, 61.26)	60.5, (58.22, 62.78)	59.95, (57.18, 62.72)	57.52, (54.71, 60.33)	62.89, (60.34, 65.44)
Max red meat 60g/day, pulses & legumes	-2.9, (-8.5, 2.7)	-2.69, (-5.98, 0.6)	-3.22, (-7.3, 0.86)	-2.84, (-6.95, 1.27)	-3.01, (-6.72, 0.7)		57.16, (53.27, 61.05)	60.34, (58.06, 62.62)	59.75, (56.99, 62.51)	57.33, (54.54, 60.12)	62.72, (60.18, 65.26)
Max red meat 31g/day, pulses & legumes	-3.76, (-9.39, 1.87)	-3.33, (-6.61, -0.05)	-4.03, (-8.1, 0.04)	-3.69, (-7.78, 0.4)	-3.71, (-7.4, -0.02)		56.3, (52.38, 60.22)	59.71, (57.45, 61.97)	58.94, (56.2, 61.68)	56.49, (53.73, 59.25)	62.03, (59.52, 64.54)
CCC 2030, vegetables	-3.28, (-8.89, 2.33)	-3.23, (-6.53, 0.07)	-3.56, (-7.68, 0.56)	-3.29, (-7.44, 0.86)	-3.4, (-7.13, 0.33)		56.78, (52.89, 60.67)	59.8, (57.52, 62.08)	59.41, (56.6, 62.22)	56.89, (54.04, 59.74)	62.34, (59.77, 64.91)
CCC 2050, vegetables	-4.44, (-10.02, 1.14)	-4.23, (-7.52, -0.94)	-4.65, (-8.74, -0.56)	-4.34, (-8.46, -0.22)	-4.35, (-8.05, -0.65)		55.61, (51.75, 59.47)	58.8, (56.53, 61.07)	58.32, (55.54, 61.1)	55.84, (53.03, 58.65)	61.39, (58.87, 63.91)
SDG, vegetables	-3.67, (-9.21, 1.87)	-3.28, (-6.57, 0.01)	-3.76, (-7.83, 0.31)	-3.34, (-7.42, 0.74)	-3.48, (-7.16, 0.2)		56.39, (52.6, 60.18)	59.75, (57.48, 62.02)	59.2, (56.46, 61.94)	56.83, (54.09, 59.57)	62.26, (59.76, 64.76)
Max red meat 60g/day, vegetables	-4.08, (-9.62, 1.46)	-3.62, (-6.91, -0.33)	-4.14, (-8.2, -0.08)	-3.71, (-7.76, 0.34)	-3.79, (-7.46, -0.12)		55.97, (52.17, 59.77)	59.41, (57.14, 61.68)	58.82, (56.1, 61.54)	56.47, (53.76, 59.18)	61.95, (59.47, 64.43)
Max red meat 31g/day, vegetables	-5.71, (-11.29, -0.13)	-4.98, (-8.26, -1.7)	-5.71, (-9.76, -1.66)	-5.3, (-9.32, -1.28)	-5.14, (-8.78, -1.5)		54.35, (50.5, 58.2)	58.05, (55.8, 60.3)	57.26, (54.55, 59.97)	54.87, (52.21, 57.53)	60.6, (58.16, 63.04)
CCC 2030, egg	-1.01, (-6.67, 4.65)	-1.12, (-4.43, 2.19)	-1.39, (-5.53, 2.75)	-1.11, (-5.29, 3.07)	-1.42, (-5.23, 2.39)		59.05, (55.08, 63.02)	61.91, (59.61, 64.21)	61.58, (58.73, 64.43)	59.07, (56.18, 61.96)	64.32, (61.63, 67.01)
CCC 2050, egg	-0.47, (-6.15, 5.21)	-0.54, (-3.85, 2.77)	-0.85, (-4.99, 3.29)	-0.52, (-4.69, 3.65)	-0.89, (-4.73, 2.95)		59.58, (55.58, 63.58)	62.5, (60.2, 64.8)	62.12, (59.27, 64.97)	59.65, (56.78, 62.52)	64.85, (62.12, 67.58)
SDG, egg	-1.42, (-7.12, 4.28)	-1.58, (-4.9, 1.74)	-2.07, (-6.19, 2.05)	-1.78, (-5.97, 2.41)	-2.04, (-5.81, 1.73)		58.64, (54.62, 62.66)	61.45, (59.14, 63.76)	60.9, (58.08, 63.72)	58.4, (55.49, 61.31)	63.7, (61.07, 66.33)
Max red meat 60g/day, egg	-1.4, (-7.1, 4.3)	-1.51, (-4.83, 1.81)	-2.04, (-6.16, 2.08)	-1.74, (-5.93, 2.45)	-2.03, (-5.8, 1.74)		58.66, (54.63, 62.69)	61.53, (59.22, 63.84)	60.92, (58.1, 63.74)	58.43, (55.52, 61.34)	63.71, (61.08, 66.34)
Max red meat 31g/day, egg	-1.29, (-7.02, 4.44)	-1.23, (-4.54, 2.08)	-1.9, (-6.01, 2.21)	-1.63, (-5.83, 2.57)	-1.9, (-5.66, 1.86)		58.76, (54.7, 62.82)	61.8, (59.5, 64.1)	61.06, (58.26, 63.86)	58.54, (55.62, 61.46)	63.84, (61.23, 66.45)
CCC 2030, non-smoked oily fish	-0.73, (-6.4, 4.94)	-0.86, (-4.17, 2.45)	-1.12, (-5.27, 3.03)	-0.84, (-5.02, 3.34)	-1.18, (-5.0, 2.64)		59.32, (55.33, 63.31)	62.17, (59.87, 64.47)	61.85, (58.99, 64.71)	59.33, (56.44, 62.22)	64.56, (61.86, 67.26)
CCC 2050, non-smoked oily fish	0.01, (-5.68, 5.7)	-0.08, (-3.39, 3.23)	-0.38, (-4.53, 3.77)	-0.05, (-4.22, 4.12)	-0.46, (-4.32, 3.4)		60.07, (56.05, 64.09)	62.95, (60.64, 65.26)	62.58, (59.72, 65.44)	60.12, (57.24, 63.0)	65.28, (62.53, 68.03)
SDG, non-smoked oily fish	-1.15, (-6.87, 4.57)	-1.37, (-4.69, 1.95)	-1.86, (-5.99, 2.27)	-1.58, (-5.79, 2.63)	-1.87, (-5.66, 1.92)		58.91, (54.86, 62.96)	61.66, (59.34, 63.98)	61.1, (58.26, 63.94)	58.59, (55.66, 61.52)	63.87, (61.22, 66.52)
Max red meat 60g/day, non-smoked oily fish	-1.07, (-6.8, 4.66)	-1.25, (-4.57, 2.07)	-1.79, (-5.92, 2.34)	-1.5, (-5.71, 2.71)	-1.81, (-5.6, 1.98)		58.99, (54.92, 63.06)	61.79, (59.47, 64.11)	61.18, (58.35, 64.01)	58.67, (55.73, 61.61)	63.92, (61.27, 66.57)
Max red meat 31g/day, non-smoked oily fish	-0.75, (-6.5, 5.0)	-0.77, (-4.09, 2.55)	-1.44, (-5.56, 2.68)	-1.18, (-5.41, 3.05)	-1.5, (-5.28, 2.28)		59.3, (55.2, 63.4)	62.26, (59.95, 64.57)	61.53, (58.71, 64.35)	58.99, (56.03, 61.95)	64.24, (61.6, 66.88)
CCC 2030, plant-based meat alternatives	-2.18, (-7.81, 3.45)	-2.21, (-5.51, 1.09)	-2.5, (-6.63, 1.63)	-2.23, (-6.39, 1.93)	-2.44, (-6.21, 1.33)		57.88, (53.95, 61.81)	60.83, (58.54, 63.12)	60.46, (57.63, 63.29)	57.94, (55.07, 60.81)	63.3, (60.67, 65.93)
CCC 2050, plant-based meat alternatives	-2.52, (-8.14, 3.1)	-2.44, (-5.73, 0.85)	-2.81, (-6.92, 1.3)	-2.49, (-6.63, 1.65)	-2.67, (-6.43, 1.09)		57.54, (53.62, 61.46)	60.59, (58.31, 62.87)	60.16, (57.35, 62.97)	57.69, (54.85, 60.53)	63.07, (60.45, 65.69)
SDG, plant-based meat alternatives	-2.58, (-8.18, 3.02)	-2.46, (-5.76, 0.84)	-2.94, (-7.03, 1.15)	-2.58, (-6.71, 1.55)	-2.78, (-6.5, 0.94)		57.48, (53.59, 61.37)	60.57, (58.29, 62.85)	60.03, (57.26, 62.8)	57.59, (54.77, 60.41)	62.96, (60.4, 65.52)
Max red meat 60g/day, plant-based meat alternatives	-2.78, (-8.39, 2.83)	-2.59, (-5.88, 0.7)	-3.13, (-7.21, 0.95)	-2.75, (-6.86, 1.36)	-2.94, (-6.65, 0.77)		57.28, (53.38, 61.18)	60.44, (58.16, 62.72)	59.84, (57.08, 62.6)	57.42, (54.62, 60.22)	62.8, (60.25, 65.35)
Max red meat 31g/day, plant-based meat alternatives	-3.57, (-9.2, 2.06)	-3.16, (-6.44, 0.12)	-3.86, (-7.93, 0.21)	-3.52, (-7.62, 0.58)	-3.57, (-7.26, 0.12)		56.49, (52.56, 60.42)	59.87, (57.61, 62.13)	59.1, (56.36, 61.84)	56.65, (53.88, 59.42)	62.17, (59.65, 64.69)
SDG, chicken	-3.38, (-8.93, 2.17)	-3.06, (-6.35, 0.23)	-3.55, (-7.62, 0.52)	-3.14, (-7.23, 0.95)	-3.29, (-6.98, 0.4)		56.68, (52.87, 60.49)	59.97, (57.7, 62.24)	59.42, (56.67, 62.17)	57.03, (54.27, 59.79)	62.44, (59.93, 64.95)
Max red meat 60g/day, chicken	-3.74, (-9.3, 1.82)	-3.35, (-6.64, -0.06)	-3.87, (-7.93, 0.19)	-3.45, (-7.52, 0.62)	-3.56, (-7.24, 0.12)		56.32, (52.5, 60.14)	59.68, (57.41, 61.95)	59.09, (56.36, 61.82)	56.72, (53.99, 59.45)	62.17, (59.67, 64.67)
Max red meat 31g/day, chicken	-5.14, (-10.73, 0.45)	-4.5, (-7.78, -1.22)	-5.22, (-9.27, -1.17)	-4.83, (-8.87, -0.79)	-4.73, (-8.38, -1.08)		54.92, (51.05, 58.79)	58.53, (56.28, 60.78)	57.75, (55.03, 60.47)	55.34, (52.65, 58.03)	61.01, (58.55, 63.47)

## Sheet: Carbohydrate
	Change in Carbohydrate, g, (95% UI), SIMD 1 (most deprived)	Change in Carbohydrate, g, (95% UI), SIMD 2	Change in Carbohydrate, g, (95% UI), SIMD 3	Change in Carbohydrate, g, (95% UI), SIMD 4	Change in Carbohydrate, g, (95% UI), SIMD 5 (least deprived)		Carbohydrate, g, (95% UI), SIMD 1 (most deprived)	Carbohydrate, g, (95% UI), SIMD 2	Carbohydrate, g, (95% UI), SIMD 3	Carbohydrate, g, (95% UI), SIMD 4	Carbohydrate, g, (95% UI), SIMD 5 (least deprived)
Baseline							195.53, (184.76, 206.3)	196.54, (190.01, 203.07)	199.62, (191.74, 207.5)	198.72, (191.07, 206.37)	209.96, (201.51, 218.41)
CCC 2030	-2.23, (-17.4, 12.94)	-2.44, (-11.63, 6.75)	-2.41, (-13.52, 8.7)	-2.39, (-13.2, 8.42)	-2.55, (-14.49, 9.39)		193.3, (182.61, 203.99)	194.1, (187.64, 200.56)	197.21, (189.38, 205.04)	196.33, (188.7, 203.96)	207.41, (198.98, 215.84)
CCC 2050	-2.46, (-17.62, 12.7)	-2.57, (-11.76, 6.62)	-2.58, (-13.69, 8.53)	-2.58, (-13.39, 8.23)	-2.7, (-14.64, 9.24)		193.07, (182.41, 203.73)	193.97, (187.51, 200.43)	197.04, (189.21, 204.87)	196.15, (188.52, 203.78)	207.26, (198.83, 215.69)
SDG	-2.39, (-17.53, 12.75)	-2.47, (-11.65, 6.71)	-2.46, (-13.56, 8.64)	-2.4, (-13.2, 8.4)	-2.62, (-14.56, 9.32)		193.14, (182.5, 203.78)	194.07, (187.62, 200.52)	197.16, (189.35, 204.97)	196.32, (188.71, 203.93)	207.34, (198.92, 215.76)
Max red meat 60g/day	-2.49, (-17.62, 12.64)	-2.52, (-11.7, 6.66)	-2.52, (-13.62, 8.58)	-2.47, (-13.26, 8.32)	-2.67, (-14.61, 9.27)		193.04, (182.41, 203.67)	194.01, (187.56, 200.46)	197.1, (189.29, 204.91)	196.25, (188.64, 203.86)	207.29, (198.86, 215.72)
Max red meat 31g/day	-2.87, (-17.98, 12.24)	-2.73, (-11.91, 6.45)	-2.8, (-13.9, 8.3)	-2.78, (-13.57, 8.01)	-2.89, (-14.83, 9.05)		192.66, (182.06, 203.26)	193.81, (187.37, 200.25)	196.82, (189.0, 204.64)	195.94, (188.33, 203.55)	207.07, (198.63, 215.51)
CCC 2030, pulses & legumes	1.45, (-13.83, 16.73)	1.31, (-7.92, 10.54)	1.33, (-9.85, 12.51)	1.36, (-9.47, 12.19)	1.12, (-10.86, 13.1)		196.98, (186.14, 207.82)	197.84, (191.32, 204.36)	200.95, (193.02, 208.88)	200.08, (192.43, 207.73)	211.08, (202.59, 219.57)
CCC 2050, pulses & legumes	2.96, (-12.37, 18.29)	2.79, (-6.45, 12.03)	2.82, (-8.4, 14.04)	2.84, (-7.99, 13.67)	2.48, (-9.53, 14.49)		198.49, (187.58, 209.4)	199.32, (192.79, 205.85)	202.44, (194.45, 210.43)	201.56, (193.89, 209.23)	212.44, (203.91, 220.97)
SDG, pulses & legumes	1.28, (-14.01, 16.57)	0.85, (-8.4, 10.1)	0.79, (-10.39, 11.97)	0.72, (-10.16, 11.6)	0.49, (-11.53, 12.51)		196.81, (185.95, 207.67)	197.39, (190.85, 203.93)	200.41, (192.48, 208.34)	199.45, (191.72, 207.18)	210.45, (201.9, 219.0)
Max red meat 60g/day, pulses & legumes	1.62, (-13.68, 16.92)	1.22, (-8.03, 10.47)	1.14, (-10.05, 12.33)	1.06, (-9.82, 11.94)	0.77, (-11.26, 12.8)		197.15, (186.28, 208.02)	197.76, (191.22, 204.3)	200.76, (192.81, 208.71)	199.78, (192.05, 207.51)	210.73, (202.17, 219.29)
Max red meat 31g/day, pulses & legumes	3.0, (-12.33, 18.33)	2.67, (-6.59, 11.93)	2.6, (-8.62, 13.82)	2.49, (-8.39, 13.37)	2.06, (-9.98, 14.1)		198.53, (187.63, 209.43)	199.21, (192.65, 205.77)	202.22, (194.23, 210.21)	201.21, (193.47, 208.95)	212.02, (203.45, 220.59)
CCC 2030, vegetables	-0.04, (-15.26, 15.18)	-0.09, (-9.32, 9.14)	-0.11, (-11.26, 11.04)	-0.08, (-10.9, 10.74)	-0.19, (-12.15, 11.77)		195.49, (184.73, 206.25)	196.45, (189.94, 202.96)	199.51, (191.62, 207.4)	198.64, (191.0, 206.28)	209.77, (201.31, 218.23)
CCC 2050, vegetables	0.34, (-14.89, 15.57)	0.35, (-8.88, 9.58)	0.31, (-10.85, 11.47)	0.32, (-10.5, 11.14)	0.19, (-11.78, 12.16)		195.87, (185.1, 206.64)	196.88, (190.37, 203.39)	199.93, (192.02, 207.84)	199.05, (191.4, 206.7)	210.15, (201.67, 218.63)
SDG, vegetables	-0.21, (-15.41, 14.99)	-0.27, (-9.49, 8.95)	-0.33, (-11.47, 10.81)	-0.31, (-11.14, 10.52)	-0.46, (-12.43, 11.51)		195.32, (184.59, 206.05)	196.26, (189.75, 202.77)	199.29, (191.41, 207.17)	198.41, (190.76, 206.06)	209.5, (201.02, 217.98)
Max red meat 60g/day, vegetables	-0.15, (-15.35, 15.05)	-0.18, (-9.4, 9.04)	-0.24, (-11.39, 10.91)	-0.24, (-11.06, 10.58)	-0.39, (-12.37, 11.59)		195.38, (184.65, 206.11)	196.36, (189.85, 202.87)	199.38, (191.5, 207.26)	198.48, (190.83, 206.13)	209.57, (201.09, 218.05)
Max red meat 31g/day, vegetables	0.09, (-15.11, 15.29)	0.2, (-9.02, 9.42)	0.09, (-11.07, 11.25)	0.07, (-10.75, 10.89)	-0.08, (-12.06, 11.9)		195.62, (184.9, 206.34)	196.74, (190.23, 203.25)	199.71, (191.81, 207.61)	198.79, (191.14, 206.44)	209.88, (201.39, 218.37)
CCC 2030, egg	-0.82, (-16.02, 14.38)	-0.81, (-10.03, 8.41)	-0.85, (-11.99, 10.29)	-0.83, (-11.64, 9.98)	-0.87, (-12.82, 11.08)		194.71, (183.99, 205.43)	195.72, (189.21, 202.23)	198.77, (190.9, 206.64)	197.89, (190.25, 205.53)	209.09, (200.64, 217.54)
CCC 2050, egg	-1.02, (-16.2, 14.16)	-0.92, (-10.14, 8.3)	-0.99, (-12.13, 10.15)	-0.99, (-11.8, 9.82)	-1.0, (-12.95, 10.95)		194.51, (183.81, 205.21)	195.61, (189.11, 202.11)	198.63, (190.76, 206.5)	197.73, (190.09, 205.37)	208.97, (200.52, 217.42)
SDG, egg	-0.98, (-16.14, 14.18)	-0.86, (-10.07, 8.35)	-0.91, (-12.03, 10.21)	-0.85, (-11.65, 9.95)	-0.95, (-12.9, 11.0)		194.55, (183.88, 205.22)	195.68, (189.19, 202.17)	198.71, (190.86, 206.56)	197.87, (190.25, 205.49)	209.01, (200.56, 217.46)
Max red meat 60g/day, egg	-1.07, (-16.23, 14.09)	-0.9, (-10.11, 8.31)	-0.96, (-12.08, 10.16)	-0.91, (-11.71, 9.89)	-1.0, (-12.95, 10.95)		194.46, (183.8, 205.12)	195.63, (189.14, 202.12)	198.66, (190.81, 206.51)	197.81, (190.19, 205.43)	208.96, (200.51, 217.41)
Max red meat 31g/day, egg	-1.43, (-16.56, 13.7)	-1.08, (-10.29, 8.13)	-1.21, (-12.34, 9.92)	-1.2, (-12.0, 9.6)	-1.19, (-13.15, 10.77)		194.1, (183.47, 204.73)	195.45, (188.96, 201.94)	198.41, (190.56, 206.26)	197.53, (189.91, 205.15)	208.77, (200.31, 217.23)
CCC 2030, non-smoked oily fish	-0.59, (-15.79, 14.61)	-0.6, (-9.82, 8.62)	-0.63, (-11.77, 10.51)	-0.61, (-11.42, 10.2)	-0.67, (-12.62, 11.28)		194.94, (184.21, 205.67)	195.94, (189.43, 202.45)	198.99, (191.12, 206.86)	198.11, (190.47, 205.75)	209.29, (200.84, 217.74)
CCC 2050, non-smoked oily fish	-0.62, (-15.81, 14.57)	-0.55, (-9.77, 8.67)	-0.61, (-11.75, 10.53)	-0.6, (-11.41, 10.21)	-0.64, (-12.6, 11.32)		194.91, (184.19, 205.63)	195.99, (189.48, 202.5)	199.01, (191.13, 206.89)	198.12, (190.48, 205.76)	209.32, (200.86, 217.78)
SDG, non-smoked oily fish	-0.75, (-15.92, 14.42)	-0.68, (-9.89, 8.53)	-0.74, (-11.87, 10.39)	-0.69, (-11.5, 10.12)	-0.8, (-12.76, 11.16)		194.78, (184.09, 205.47)	195.85, (189.35, 202.35)	198.88, (191.02, 206.74)	198.03, (190.4, 205.66)	209.16, (200.71, 217.61)
Max red meat 60g/day, non-smoked oily fish	-0.8, (-15.97, 14.37)	-0.69, (-9.9, 8.52)	-0.75, (-11.88, 10.38)	-0.71, (-11.52, 10.1)	-0.82, (-12.78, 11.14)		194.73, (184.05, 205.41)	195.85, (189.35, 202.35)	198.87, (191.01, 206.73)	198.01, (190.38, 205.64)	209.14, (200.68, 217.6)
Max red meat 31g/day, non-smoked oily fish	-0.98, (-16.13, 14.17)	-0.7, (-9.91, 8.51)	-0.83, (-11.97, 10.31)	-0.82, (-11.63, 9.99)	-0.86, (-12.83, 11.11)		194.55, (183.89, 205.21)	195.83, (189.34, 202.32)	198.79, (190.92, 206.66)	197.9, (190.27, 205.53)	209.1, (200.63, 217.57)
CCC 2030, plant-based meat alternatives	0.48, (-14.76, 15.72)	0.4, (-8.83, 9.63)	0.4, (-10.76, 11.56)	0.43, (-10.39, 11.25)	0.27, (-11.7, 12.24)		196.02, (185.23, 206.81)	196.94, (190.42, 203.46)	200.02, (192.12, 207.92)	199.15, (191.5, 206.8)	210.23, (201.76, 218.7)
CCC 2050, plant-based meat alternatives	1.26, (-14.0, 16.52)	1.2, (-8.03, 10.43)	1.2, (-9.98, 12.38)	1.21, (-9.61, 12.03)	1.0, (-10.99, 12.99)		196.79, (185.97, 207.61)	197.74, (191.22, 204.26)	200.81, (192.88, 208.74)	199.93, (192.28, 207.58)	210.96, (202.46, 219.46)
SDG, plant-based meat alternatives	0.31, (-14.92, 15.54)	0.12, (-9.11, 9.35)	0.07, (-11.09, 11.23)	0.05, (-10.79, 10.89)	-0.12, (-12.11, 11.87)		195.85, (185.07, 206.63)	196.66, (190.14, 203.18)	199.69, (191.8, 207.58)	198.78, (191.1, 206.46)	209.84, (201.34, 218.34)
Max red meat 60g/day, plant-based meat alternatives	0.48, (-14.76, 15.72)	0.31, (-8.92, 9.54)	0.25, (-10.91, 11.41)	0.22, (-10.62, 11.06)	0.02, (-11.97, 12.01)		196.01, (185.23, 206.79)	196.85, (190.33, 203.37)	199.87, (191.97, 207.77)	198.94, (191.26, 206.62)	209.98, (201.47, 218.49)
Max red meat 31g/day, plant-based meat alternatives	1.11, (-14.13, 16.35)	1.07, (-8.16, 10.3)	0.98, (-10.2, 12.16)	0.92, (-9.92, 11.76)	0.67, (-11.33, 12.67)		196.64, (185.86, 207.42)	197.61, (191.09, 204.13)	200.6, (192.67, 208.53)	199.64, (191.96, 207.32)	210.63, (202.11, 219.15)
SDG, chicken	-1.02, (-16.18, 14.14)	-0.88, (-10.09, 8.33)	-0.93, (-12.05, 10.19)	-0.87, (-11.67, 9.93)	-0.97, (-12.92, 10.98)		194.52, (183.85, 205.19)	195.65, (189.16, 202.14)	198.68, (190.83, 206.53)	197.85, (190.23, 205.47)	208.99, (200.55, 217.43)
Max red meat 60g/day, chicken	-1.11, (-16.26, 14.04)	-0.94, (-10.15, 8.27)	-1.0, (-12.12, 10.12)	-0.95, (-11.75, 9.85)	-1.03, (-12.98, 10.92)		194.42, (183.76, 205.08)	195.6, (189.11, 202.09)	198.62, (190.77, 206.47)	197.78, (190.16, 205.4)	208.94, (200.49, 217.39)
Max red meat 31g/day, chicken	-1.5, (-16.63, 13.63)	-1.14, (-10.35, 8.07)	-1.27, (-12.4, 9.86)	-1.25, (-12.05, 9.55)	-1.25, (-13.21, 10.71)		194.03, (183.4, 204.66)	195.39, (188.9, 201.88)	198.35, (190.5, 206.2)	197.47, (189.85, 205.09)	208.72, (200.26, 217.18)

[truncated: 52 more sheets: Free Sugars, Sodium, Haem Iron, Non-haem Iron, Thiamin, Saturated fatty acids, Trans fatty acids, Cis monounsaturated fatty acids, n-6 fatty acids, n-3 fatty acids, Vitamin D, Vitamin A, Riboflavin, Potassium, Vitamin B6, Cholesterol, Magnesium, Phosphorus, Copper, Choloride …]
