# Supplementary material for: Impact of reducing meat and dairy consumption on nutrient intake, health, cost of diets and the environment: A simulation among adults in Scotland
Source: Research Square preprint supplement (doi:10.21203/rs.3.rs-5820769/v1), 2025-02-04
Supplement: Supplementary file 5 [file 675cd5ff027afb514fa0ed84.xlsx]

## Sheet: Energy
	Change in Energy, kcal, (95% UI), Men	Change in Energy, kcal, (95% UI), Women		Energy, kcal, (95% UI), Men	Energy, kcal, (95% UI), Women
Baseline				1782.01, (1730.44, 1833.58)	1487.5, (1459.35, 1515.65)
CCC 2030	-90.21, (-161.52, -18.9)	-73.32, (-112.26, -34.38)		1691.8, (1642.56, 1741.04)	1414.17, (1387.25, 1441.09)
CCC 2050	-117.79, (-188.8, -46.78)	-92.0, (-130.81, -53.19)		1664.22, (1615.4, 1713.04)	1395.5, (1368.77, 1422.23)
SDG	-91.73, (-162.16, -21.3)	-65.83, (-104.71, -26.95)		1690.28, (1642.31, 1738.25)	1421.67, (1394.85, 1448.49)
Max red meat 60g/day	-99.62, (-169.94, -29.3)	-70.77, (-109.57, -31.97)		1682.39, (1634.58, 1730.2)	1416.73, (1390.02, 1443.44)
Max red meat 31g/day	-131.07, (-201.52, -60.62)	-92.31, (-130.98, -53.64)		1650.95, (1602.96, 1698.94)	1395.19, (1368.68, 1421.7)
CCC 2030, pulses & legumes	-41.21, (-113.32, 30.9)	-34.53, (-73.74, 4.68)		1740.8, (1690.41, 1791.19)	1452.97, (1425.67, 1480.27)
CCC 2050, pulses & legumes	-50.07, (-122.07, 21.93)	-40.17, (-79.31, -1.03)		1731.94, (1681.7, 1782.18)	1447.33, (1420.12, 1474.54)
SDG, pulses & legumes	-44.15, (-115.91, 27.61)	-33.71, (-72.85, 5.43)		1737.86, (1687.96, 1787.76)	1453.79, (1426.6, 1480.98)
Max red meat 60g/day, pulses & legumes	-47.31, (-119.03, 24.41)	-35.56, (-74.65, 3.53)		1734.7, (1684.86, 1784.54)	1451.93, (1424.8, 1479.06)
Max red meat 31g/day, pulses & legumes	-59.74, (-131.58, 12.1)	-43.53, (-82.52, -4.54)		1722.27, (1672.26, 1772.28)	1443.97, (1416.98, 1470.96)
CCC 2030, vegetables	-60.47, (-132.35, 11.41)	-47.93, (-87.06, -8.8)		1721.54, (1671.46, 1771.62)	1439.57, (1412.39, 1466.75)
CCC 2050, vegetables	-83.77, (-155.4, -12.14)	-63.62, (-102.63, -24.61)		1698.24, (1648.53, 1747.95)	1423.88, (1396.87, 1450.89)
SDG, vegetables	-62.31, (-133.42, 8.8)	-41.96, (-81.01, -2.91)		1719.7, (1670.74, 1768.66)	1445.54, (1418.47, 1472.61)
Max red meat 60g/day, vegetables	-69.12, (-140.14, 1.9)	-46.2, (-85.18, -7.22)		1712.89, (1664.07, 1761.71)	1441.3, (1414.33, 1468.27)
Max red meat 31g/day, vegetables	-96.22, (-167.36, -25.08)	-64.63, (-103.48, -25.78)		1685.8, (1636.8, 1734.8)	1422.87, (1396.09, 1449.65)
CCC 2030, egg	-32.44, (-104.65, 39.77)	-28.42, (-67.68, 10.84)		1749.57, (1699.02, 1800.12)	1459.07, (1431.7, 1486.44)
CCC 2050, egg	-34.72, (-106.9, 37.46)	-29.49, (-68.71, 9.73)		1747.29, (1696.79, 1797.79)	1458.01, (1430.7, 1485.32)
SDG, egg	-35.88, (-107.97, 36.21)	-29.95, (-69.14, 9.24)		1746.13, (1695.76, 1796.5)	1457.55, (1430.28, 1484.82)
Max red meat 60g/day, egg	-37.37, (-109.45, 34.71)	-30.72, (-69.88, 8.44)		1744.64, (1694.29, 1794.99)	1456.78, (1429.56, 1484.0)
Max red meat 31g/day, egg	-43.12, (-115.32, 29.08)	-33.92, (-73.0, 5.16)		1738.89, (1688.36, 1789.42)	1453.58, (1426.46, 1480.7)
CCC 2030, non-smoked oily fish	-21.51, (-93.86, 50.84)	-20.81, (-60.12, 18.5)		1760.5, (1709.76, 1811.24)	1466.69, (1439.24, 1494.14)
CCC 2050, non-smoked oily fish	-15.59, (-88.01, 56.83)	-16.17, (-55.49, 23.15)		1766.43, (1715.59, 1817.27)	1471.33, (1443.87, 1498.79)
SDG, non-smoked oily fish	-25.57, (-98.09, 46.95)	-25.26, (-64.53, 14.01)		1756.44, (1705.46, 1807.42)	1462.24, (1434.86, 1489.62)
Max red meat 60g/day, non-smoked oily fish	-24.99, (-97.54, 47.56)	-24.69, (-63.95, 14.57)		1757.02, (1705.99, 1808.05)	1462.81, (1435.45, 1490.17)
Max red meat 31g/day, non-smoked oily fish	-22.41, (-95.1, 50.28)	-21.94, (-61.17, 17.29)		1759.61, (1708.38, 1810.84)	1465.56, (1438.24, 1492.88)
CCC 2030, plant-based meat alternatives	-39.71, (-111.83, 32.41)	-33.48, (-72.7, 5.74)		1742.3, (1691.88, 1792.72)	1454.02, (1426.71, 1481.33)
CCC 2050, plant-based meat alternatives	-47.44, (-119.47, 24.59)	-38.34, (-77.5, 0.82)		1734.57, (1684.29, 1784.85)	1449.16, (1421.94, 1476.38)
SDG, plant-based meat alternatives	-42.73, (-114.55, 29.09)	-33.06, (-72.2, 6.08)		1739.28, (1689.3, 1789.26)	1454.44, (1427.23, 1481.65)
Max red meat 60g/day, plant-based meat alternatives	-45.6, (-117.38, 26.18)	-34.73, (-73.83, 4.37)		1736.41, (1686.48, 1786.34)	1452.77, (1425.63, 1479.91)
Max red meat 31g/day, plant-based meat alternatives	-56.89, (-128.79, 15.01)	-41.88, (-80.89, -2.87)		1725.13, (1675.03, 1775.23)	1445.62, (1418.61, 1472.63)
SDG, chicken	-41.07, (-112.95, 30.81)	-32.31, (-71.46, 6.84)		1740.94, (1690.87, 1791.01)	1455.19, (1427.97, 1482.41)
Max red meat 60g/day, chicken	-43.61, (-115.46, 28.24)	-33.76, (-72.87, 5.35)		1738.41, (1688.38, 1788.44)	1453.74, (1426.58, 1480.9)
Max red meat 31g/day, chicken	-53.54, (-125.51, 18.43)	-39.95, (-78.97, -0.93)		1728.47, (1678.27, 1778.67)	1447.55, (1420.52, 1474.58)

## Sheet: Protein
	Change in Protein, g, (95% UI), Men	Change in Protein, g, (95% UI), Women		Protein, g, (95% UI), Men	Protein, g, (95% UI), Women
Baseline				74.4, (72.12, 76.68)	60.47, (58.98, 61.96)
CCC 2030	-7.59, (-10.67, -4.51)	-6.01, (-8.0, -4.02)		66.81, (64.74, 68.88)	54.46, (53.13, 55.79)
CCC 2050	-11.21, (-14.23, -8.19)	-8.58, (-10.53, -6.63)		63.19, (61.21, 65.17)	51.88, (50.62, 53.14)
SDG	-6.83, (-9.86, -3.8)	-4.47, (-6.51, -2.43)		67.57, (65.57, 69.57)	56.0, (54.6, 57.4)
Max red meat 60g/day	-7.64, (-10.66, -4.62)	-5.02, (-7.06, -2.98)		66.76, (64.78, 68.74)	55.45, (54.05, 56.85)
Max red meat 31g/day	-10.9, (-13.92, -7.88)	-7.4, (-9.42, -5.38)		63.5, (61.52, 65.48)	53.07, (51.7, 54.44)
CCC 2030, pulses & legumes	-5.82, (-8.93, -2.71)	-4.59, (-6.6, -2.58)		68.58, (66.47, 70.69)	55.88, (54.52, 57.24)
CCC 2050, pulses & legumes	-8.61, (-11.67, -5.55)	-6.59, (-8.57, -4.61)		65.79, (63.75, 67.83)	53.88, (52.58, 55.18)
SDG, pulses & legumes	-5.12, (-8.19, -2.05)	-3.35, (-5.4, -1.3)		69.28, (67.22, 71.34)	57.12, (55.7, 58.54)
Max red meat 60g/day, pulses & legumes	-5.73, (-8.79, -2.67)	-3.76, (-5.81, -1.71)		68.67, (66.63, 70.71)	56.71, (55.3, 58.12)
Max red meat 31g/day, pulses & legumes	-8.15, (-11.21, -5.09)	-5.54, (-7.57, -3.51)		66.25, (64.22, 68.28)	54.93, (53.55, 56.31)
CCC 2030, vegetables	-6.54, (-9.64, -3.44)	-5.09, (-7.1, -3.08)		67.86, (65.76, 69.96)	55.37, (54.02, 56.72)
CCC 2050, vegetables	-9.88, (-12.92, -6.84)	-7.47, (-9.43, -5.51)		64.52, (62.51, 66.53)	53.0, (51.72, 54.28)
SDG, vegetables	-5.8, (-8.85, -2.75)	-3.66, (-5.71, -1.61)		68.6, (66.57, 70.63)	56.81, (55.39, 58.23)
Max red meat 60g/day, vegetables	-6.54, (-9.58, -3.5)	-4.16, (-6.21, -2.11)		67.86, (65.85, 69.87)	56.31, (54.9, 57.72)
Max red meat 31g/day, vegetables	-9.52, (-12.56, -6.48)	-6.33, (-8.36, -4.3)		64.88, (62.87, 66.89)	54.14, (52.76, 55.52)
CCC 2030, egg	-4.43, (-7.56, -1.3)	-3.63, (-5.66, -1.6)		69.97, (67.82, 72.12)	56.84, (55.45, 58.23)
CCC 2050, egg	-6.19, (-9.28, -3.1)	-4.9, (-6.91, -2.89)		68.21, (66.12, 70.3)	55.57, (54.22, 56.92)
SDG, egg	-3.81, (-6.93, -0.69)	-2.75, (-4.81, -0.69)		70.59, (68.47, 72.71)	57.72, (56.29, 59.15)
Max red meat 60g/day, egg	-4.16, (-7.27, -1.05)	-2.99, (-5.05, -0.93)		70.24, (68.13, 72.35)	57.47, (56.05, 58.89)
Max red meat 31g/day, egg	-5.52, (-8.62, -2.42)	-4.02, (-6.06, -1.98)		68.88, (66.78, 70.98)	56.45, (55.05, 57.85)
CCC 2030, non-smoked oily fish	-2.65, (-5.82, 0.52)	-2.39, (-4.45, -0.33)		71.74, (69.54, 73.94)	58.08, (56.66, 59.5)
CCC 2050, non-smoked oily fish	-3.08, (-6.23, 0.07)	-2.74, (-4.79, -0.69)		71.32, (69.15, 73.49)	57.73, (56.32, 59.14)
SDG, non-smoked oily fish	-2.14, (-5.33, 1.05)	-1.99, (-4.07, 0.09)		72.26, (70.03, 74.49)	58.48, (57.03, 59.93)
Max red meat 60g/day, non-smoked oily fish	-2.14, (-5.33, 1.05)	-2.01, (-4.09, 0.07)		72.25, (70.03, 74.47)	58.46, (57.01, 59.91)
Max red meat 31g/day, non-smoked oily fish	-2.16, (-5.34, 1.02)	-2.07, (-4.14, 0.0)		72.24, (70.02, 74.46)	58.4, (56.95, 59.85)
CCC 2030, plant-based meat alternatives	-4.69, (-7.82, -1.56)	-3.81, (-5.84, -1.78)		69.71, (67.57, 71.85)	56.66, (55.28, 58.04)
CCC 2050, plant-based meat alternatives	-6.63, (-9.72, -3.54)	-5.21, (-7.21, -3.21)		67.76, (65.68, 69.84)	55.25, (53.91, 56.59)
SDG, plant-based meat alternatives	-4.05, (-7.16, -0.94)	-2.86, (-4.92, -0.8)		70.35, (68.24, 72.46)	57.61, (56.18, 59.04)
Max red meat 60g/day, plant-based meat alternatives	-4.45, (-7.55, -1.35)	-3.14, (-5.2, -1.08)		69.95, (67.85, 72.05)	57.33, (55.91, 58.75)
Max red meat 31g/day, plant-based meat alternatives	-6.01, (-9.1, -2.92)	-4.3, (-6.34, -2.26)		68.39, (66.3, 70.48)	56.17, (54.77, 57.57)
SDG, chicken	-0.4, (-3.68, 2.88)	-1.2, (-3.3, 0.9)		74.0, (71.64, 76.36)	59.27, (57.78, 60.76)
Max red meat 60g/day, chicken	-0.06, (-3.35, 3.23)	-1.0, (-3.11, 1.11)		74.34, (71.97, 76.71)	59.47, (57.98, 60.96)
Max red meat 31g/day, chicken	1.34, (-1.95, 4.63)	-0.05, (-2.17, 2.07)		75.74, (73.36, 78.12)	60.42, (58.91, 61.93)

## Sheet: Calcium
	Change in Calcium, mg, (95% UI), Men	Change in Calcium, mg, (95% UI), Women		Calcium, mg, (95% UI), Men	Calcium, mg, (95% UI), Women
Baseline				849.56, (813.77, 885.35)	760.25, (741.28, 779.22)
CCC 2030	-88.87, (-136.42, -41.32)	-81.71, (-106.99, -56.43)		760.69, (729.39, 791.99)	678.54, (661.83, 695.25)
CCC 2050	-91.55, (-139.14, -43.96)	-83.45, (-108.72, -58.18)		758.01, (726.65, 789.37)	676.8, (660.1, 693.5)
SDG	-89.64, (-137.07, -42.21)	-81.37, (-106.62, -56.12)		759.91, (728.79, 791.03)	678.88, (662.21, 695.55)
Max red meat 60g/day	-90.57, (-138.01, -43.13)	-81.9, (-107.15, -56.65)		758.99, (727.85, 790.13)	678.35, (661.68, 695.02)
Max red meat 31g/day	-94.18, (-141.72, -46.64)	-84.34, (-109.58, -59.1)		755.37, (724.08, 786.66)	675.91, (659.26, 692.56)
CCC 2030, pulses & legumes	-48.62, (-97.24, -0.0)	-45.71, (-71.48, -19.94)		800.93, (768.03, 833.83)	714.53, (697.09, 731.97)
CCC 2050, pulses & legumes	-45.43, (-94.07, 3.21)	-43.37, (-69.15, -17.59)		804.12, (771.19, 837.05)	716.87, (699.41, 734.33)
SDG, pulses & legumes	-49.84, (-98.57, -1.11)	-47.46, (-73.22, -21.7)		799.72, (766.66, 832.78)	712.78, (695.35, 730.21)
Max red meat 60g/day, pulses & legumes	-49.28, (-98.03, -0.53)	-47.03, (-72.8, -21.26)		800.28, (767.18, 833.38)	713.21, (695.77, 730.65)
Max red meat 31g/day, pulses & legumes	-46.94, (-95.76, 1.88)	-45.22, (-71.01, -19.43)		802.62, (769.42, 835.82)	715.03, (697.57, 732.49)
CCC 2030, vegetables	-50.17, (-98.79, -1.55)	-46.79, (-72.56, -21.02)		799.38, (766.47, 832.29)	713.45, (696.01, 730.89)
CCC 2050, vegetables	-48.15, (-96.8, 0.5)	-45.26, (-71.03, -19.49)		801.41, (768.47, 834.35)	714.98, (697.53, 732.43)
SDG, vegetables	-51.3, (-99.98, -2.62)	-48.13, (-73.89, -22.37)		798.25, (765.25, 831.25)	712.12, (694.7, 729.54)
Max red meat 60g/day, vegetables	-51.04, (-99.75, -2.33)	-47.89, (-73.65, -22.13)		798.52, (765.49, 831.55)	712.36, (694.93, 729.79)
Max red meat 31g/day, vegetables	-49.88, (-98.66, -1.1)	-46.92, (-72.69, -21.15)		799.68, (766.53, 832.83)	713.33, (695.89, 730.77)
CCC 2030, egg	-46.25, (-94.86, 2.36)	-44.06, (-69.84, -18.28)		803.3, (770.41, 836.19)	716.18, (698.73, 733.63)
CCC 2050, egg	-41.29, (-89.91, 7.33)	-40.49, (-66.28, -14.7)		808.27, (775.36, 841.18)	719.76, (702.29, 737.23)
SDG, egg	-47.61, (-96.41, 1.19)	-46.45, (-72.22, -20.68)		801.95, (768.79, 835.11)	713.8, (696.35, 731.25)
Max red meat 60g/day, egg	-46.6, (-95.42, 2.22)	-45.73, (-71.52, -19.94)		802.96, (769.76, 836.16)	714.52, (697.05, 731.99)
Max red meat 31g/day, egg	-42.45, (-91.34, 6.44)	-42.62, (-68.43, -16.81)		807.1, (773.8, 840.4)	717.62, (700.12, 735.12)
CCC 2030, non-smoked oily fish	-47.82, (-96.43, 0.79)	-45.16, (-70.94, -19.38)		801.74, (768.85, 834.63)	715.09, (697.64, 732.54)
CCC 2050, non-smoked oily fish	-44.03, (-92.66, 4.6)	-42.4, (-68.18, -16.62)		805.52, (772.6, 838.44)	717.85, (700.39, 735.31)
SDG, non-smoked oily fish	-49.08, (-97.83, -0.33)	-47.12, (-72.89, -21.35)		800.47, (767.37, 833.57)	713.13, (695.7, 730.56)
Max red meat 60g/day, non-smoked oily fish	-48.37, (-97.14, 0.4)	-46.59, (-72.37, -20.81)		801.19, (768.06, 834.32)	713.66, (696.21, 731.11)
Max red meat 31g/day, non-smoked oily fish	-45.42, (-94.26, 3.42)	-44.34, (-70.13, -18.55)		804.14, (770.91, 837.37)	715.91, (698.44, 733.38)
CCC 2030, plant-based meat alternatives	-28.88, (-77.44, 19.68)	-31.97, (-57.8, -6.14)		820.68, (787.86, 853.5)	728.27, (710.75, 745.79)
CCC 2050, plant-based meat alternatives	-10.89, (-59.46, 37.68)	-19.33, (-45.22, 6.56)		838.67, (805.84, 871.5)	740.91, (723.29, 758.53)
SDG, plant-based meat alternatives	-31.22, (-80.58, 18.14)	-39.0, (-64.89, -13.11)		818.34, (784.36, 852.32)	721.25, (703.64, 738.86)
Max red meat 60g/day, plant-based meat alternatives	-26.92, (-76.33, 22.49)	-36.13, (-62.06, -10.2)		822.64, (788.57, 856.71)	724.11, (706.43, 741.79)
Max red meat 31g/day, plant-based meat alternatives	-9.54, (-58.98, 39.9)	-23.59, (-49.62, 2.44)		840.02, (805.92, 874.12)	736.66, (718.83, 754.49)
SDG, chicken	-56.14, (-104.69, -7.59)	-50.32, (-76.06, -24.58)		793.42, (760.62, 826.22)	709.92, (692.53, 727.31)
Max red meat 60g/day, chicken	-56.84, (-105.4, -8.28)	-50.72, (-76.46, -24.98)		792.72, (759.9, 825.54)	709.53, (692.14, 726.92)
Max red meat 31g/day, chicken	-59.59, (-108.25, -10.93)	-52.53, (-78.26, -26.8)		789.97, (757.0, 822.94)	707.71, (690.33, 725.09)

## Sheet: Iron
	Change in Iron, mg, (95% UI), Men	Change in Iron, mg, (95% UI), Women		Iron, mg, (95% UI), Men	Iron, mg, (95% UI), Women
Baseline				10.36, (9.98, 10.74)	8.77, (8.55, 8.99)
CCC 2030	-0.25, (-0.78, 0.28)	-0.18, (-0.49, 0.13)		10.11, (9.73, 10.49)	8.59, (8.37, 8.81)
CCC 2050	-0.42, (-0.95, 0.11)	-0.29, (-0.6, 0.02)		9.94, (9.57, 10.31)	8.47, (8.25, 8.69)
SDG	-0.29, (-0.82, 0.24)	-0.15, (-0.46, 0.16)		10.07, (9.71, 10.43)	8.62, (8.4, 8.84)
Max red meat 60g/day	-0.34, (-0.86, 0.18)	-0.18, (-0.49, 0.13)		10.01, (9.65, 10.37)	8.58, (8.36, 8.8)
Max red meat 31g/day	-0.58, (-1.11, -0.05)	-0.35, (-0.66, -0.04)		9.78, (9.41, 10.15)	8.42, (8.2, 8.64)
CCC 2030, pulses & legumes	0.2, (-0.34, 0.74)	0.17, (-0.14, 0.48)		10.56, (10.18, 10.94)	8.94, (8.72, 9.16)
CCC 2050, pulses & legumes	0.26, (-0.28, 0.8)	0.21, (-0.1, 0.52)		10.62, (10.24, 11.0)	8.98, (8.76, 9.2)
SDG, pulses & legumes	0.14, (-0.4, 0.68)	0.12, (-0.19, 0.43)		10.5, (10.12, 10.88)	8.89, (8.67, 9.11)
Max red meat 60g/day, pulses & legumes	0.14, (-0.4, 0.68)	0.12, (-0.19, 0.43)		10.5, (10.12, 10.88)	8.89, (8.67, 9.11)
Max red meat 31g/day, pulses & legumes	0.14, (-0.4, 0.68)	0.12, (-0.19, 0.43)		10.5, (10.11, 10.89)	8.89, (8.67, 9.11)
CCC 2030, vegetables	0.03, (-0.51, 0.57)	0.05, (-0.26, 0.36)		10.39, (10.01, 10.77)	8.82, (8.6, 9.04)
CCC 2050, vegetables	-0.04, (-0.58, 0.5)	0.01, (-0.3, 0.32)		10.32, (9.94, 10.7)	8.77, (8.55, 8.99)
SDG, vegetables	-0.01, (-0.54, 0.52)	0.05, (-0.26, 0.36)		10.34, (9.97, 10.71)	8.82, (8.6, 9.04)
Max red meat 60g/day, vegetables	-0.05, (-0.58, 0.48)	0.03, (-0.28, 0.34)		10.31, (9.94, 10.68)	8.79, (8.57, 9.01)
Max red meat 31g/day, vegetables	-0.18, (-0.71, 0.35)	-0.07, (-0.38, 0.24)		10.18, (9.8, 10.56)	8.7, (8.48, 8.92)
CCC 2030, egg	0.24, (-0.3, 0.78)	0.2, (-0.11, 0.51)		10.6, (10.22, 10.98)	8.97, (8.75, 9.19)
CCC 2050, egg	0.33, (-0.21, 0.87)	0.26, (-0.05, 0.57)		10.68, (10.3, 11.06)	9.03, (8.81, 9.25)
SDG, egg	0.18, (-0.36, 0.72)	0.14, (-0.17, 0.45)		10.54, (10.15, 10.93)	8.9, (8.68, 9.12)
Max red meat 60g/day, egg	0.19, (-0.35, 0.73)	0.14, (-0.17, 0.45)		10.55, (10.16, 10.94)	8.91, (8.69, 9.13)
Max red meat 31g/day, egg	0.22, (-0.32, 0.76)	0.16, (-0.15, 0.47)		10.57, (10.18, 10.96)	8.93, (8.71, 9.15)
CCC 2030, non-smoked oily fish	0.01, (-0.53, 0.55)	0.04, (-0.27, 0.35)		10.37, (9.99, 10.75)	8.81, (8.59, 9.03)
CCC 2050, non-smoked oily fish	-0.08, (-0.62, 0.46)	-0.02, (-0.33, 0.29)		10.28, (9.9, 10.66)	8.74, (8.52, 8.96)
SDG, non-smoked oily fish	-0.04, (-0.57, 0.49)	0.04, (-0.27, 0.35)		10.32, (9.95, 10.69)	8.8, (8.58, 9.02)
Max red meat 60g/day, non-smoked oily fish	-0.08, (-0.61, 0.45)	0.01, (-0.3, 0.32)		10.28, (9.91, 10.65)	8.78, (8.56, 9.0)
Max red meat 31g/day, non-smoked oily fish	-0.22, (-0.75, 0.31)	-0.09, (-0.4, 0.22)		10.13, (9.76, 10.5)	8.67, (8.45, 8.89)
CCC 2030, plant-based meat alternatives	0.2, (-0.34, 0.74)	0.17, (-0.14, 0.48)		10.56, (10.18, 10.94)	8.94, (8.72, 9.16)
CCC 2050, plant-based meat alternatives	0.26, (-0.28, 0.8)	0.21, (-0.1, 0.52)		10.62, (10.24, 11.0)	8.98, (8.76, 9.2)
SDG, plant-based meat alternatives	0.15, (-0.39, 0.69)	0.12, (-0.19, 0.43)		10.5, (10.12, 10.88)	8.89, (8.67, 9.11)
Max red meat 60g/day, plant-based meat alternatives	0.15, (-0.39, 0.69)	0.12, (-0.19, 0.43)		10.5, (10.12, 10.88)	8.89, (8.67, 9.11)
Max red meat 31g/day, plant-based meat alternatives	0.15, (-0.39, 0.69)	0.12, (-0.19, 0.43)		10.5, (10.11, 10.89)	8.89, (8.67, 9.11)
SDG, chicken	-0.07, (-0.6, 0.46)	0.02, (-0.29, 0.33)		10.29, (9.92, 10.66)	8.79, (8.57, 9.01)
Max red meat 60g/day, chicken	-0.11, (-0.64, 0.42)	-0.01, (-0.32, 0.3)		10.24, (9.87, 10.61)	8.76, (8.54, 8.98)
Max red meat 31g/day, chicken	-0.29, (-0.82, 0.24)	-0.13, (-0.44, 0.18)		10.07, (9.7, 10.44)	8.64, (8.42, 8.86)

## Sheet: Iodine
	Change in Iodine, ug, (95% UI), Men	Change in Iodine, ug, (95% UI), Women		Iodine, ug, (95% UI), Men	Iodine, ug, (95% UI), Women
Baseline				158.7, (150.73, 166.67)	134.08, (129.9, 138.26)
CCC 2030	-16.64, (-27.48, -5.8)	-15.32, (-21.0, -9.64)		142.06, (134.7, 149.42)	118.75, (114.91, 122.59)
CCC 2050	-17.72, (-28.57, -6.87)	-16.08, (-21.76, -10.4)		140.98, (133.61, 148.35)	117.99, (114.15, 121.83)
SDG	-16.54, (-27.36, -5.72)	-14.95, (-20.62, -9.28)		142.16, (134.83, 149.49)	119.12, (115.29, 122.95)
Max red meat 60g/day	-16.83, (-27.66, -6.0)	-15.14, (-20.81, -9.47)		141.87, (134.54, 149.2)	118.93, (115.1, 122.76)
Max red meat 31g/day	-18.0, (-28.85, -7.15)	-15.98, (-21.66, -10.3)		140.7, (133.34, 148.06)	118.1, (114.26, 121.94)
CCC 2030, pulses & legumes	-14.28, (-25.18, -3.38)	-13.2, (-18.9, -7.5)		144.42, (136.98, 151.86)	120.88, (117.0, 124.76)
CCC 2050, pulses & legumes	-14.95, (-25.86, -4.04)	-13.68, (-19.38, -7.98)		143.75, (136.3, 151.2)	120.4, (116.52, 124.28)
SDG, pulses & legumes	-14.2, (-25.09, -3.31)	-12.97, (-18.67, -7.27)		144.5, (137.08, 151.92)	121.1, (117.23, 124.97)
Max red meat 60g/day, pulses & legumes	-14.39, (-25.28, -3.5)	-13.09, (-18.79, -7.39)		144.31, (136.89, 151.73)	120.98, (117.11, 124.85)
Max red meat 31g/day, pulses & legumes	-15.16, (-26.07, -4.25)	-13.64, (-19.34, -7.94)		143.54, (136.09, 150.99)	120.44, (116.56, 124.32)
CCC 2030, vegetables	-14.47, (-25.37, -3.57)	-13.33, (-19.03, -7.63)		144.23, (136.79, 151.67)	120.75, (116.87, 124.63)
CCC 2050, vegetables	-15.29, (-26.2, -4.38)	-13.91, (-19.61, -8.21)		143.41, (135.96, 150.86)	120.17, (116.29, 124.05)
SDG, vegetables	-14.38, (-25.26, -3.5)	-13.05, (-18.75, -7.35)		144.32, (136.91, 151.73)	121.02, (117.15, 124.89)
Max red meat 60g/day, vegetables	-14.6, (-25.49, -3.71)	-13.2, (-18.9, -7.5)		144.1, (136.68, 151.52)	120.88, (117.01, 124.75)
Max red meat 31g/day, vegetables	-15.52, (-26.43, -4.61)	-13.85, (-19.55, -8.15)		143.18, (135.73, 150.63)	120.23, (116.35, 124.11)
CCC 2030, egg	-4.73, (-15.63, 6.17)	-6.55, (-12.27, -0.83)		153.97, (146.53, 161.41)	127.53, (123.62, 131.44)
CCC 2050, egg	1.76, (-9.17, 12.69)	-2.05, (-7.8, 3.7)		160.46, (152.98, 167.94)	132.03, (128.09, 135.97)
SDG, egg	-5.19, (-16.31, 5.93)	-8.88, (-14.63, -3.13)		153.51, (145.75, 161.27)	125.2, (121.26, 129.14)
Max red meat 60g/day, egg	-3.57, (-14.71, 7.57)	-7.82, (-13.58, -2.06)		155.13, (147.34, 162.92)	126.25, (122.3, 130.2)
Max red meat 31g/day, egg	2.93, (-8.23, 14.09)	-3.17, (-8.95, 2.61)		161.64, (153.82, 169.46)	130.9, (126.9, 134.9)
CCC 2030, non-smoked oily fish	-11.02, (-21.92, -0.12)	-10.93, (-16.64, -5.22)		147.68, (140.25, 155.11)	123.14, (119.26, 127.02)
CCC 2050, non-smoked oily fish	-9.26, (-20.16, 1.64)	-9.71, (-15.42, -4.0)		149.44, (142.0, 156.88)	124.36, (120.47, 128.25)
SDG, non-smoked oily fish	-11.13, (-22.08, -0.18)	-11.58, (-17.29, -5.87)		147.57, (140.06, 155.08)	122.5, (118.62, 126.38)
Max red meat 60g/day, non-smoked oily fish	-10.7, (-21.66, 0.26)	-11.3, (-17.01, -5.59)		148.0, (140.48, 155.52)	122.78, (118.89, 126.67)
Max red meat 31g/day, non-smoked oily fish	-8.99, (-19.96, 1.98)	-10.07, (-15.78, -4.36)		149.71, (142.17, 157.25)	124.0, (120.11, 127.89)
CCC 2030, plant-based meat alternatives	-13.96, (-24.86, -3.06)	-12.98, (-18.68, -7.28)		144.74, (137.3, 152.18)	121.1, (117.22, 124.98)
CCC 2050, plant-based meat alternatives	-14.4, (-25.31, -3.49)	-13.29, (-18.99, -7.59)		144.3, (136.85, 151.75)	120.78, (116.9, 124.66)
SDG, plant-based meat alternatives	-13.9, (-24.79, -3.01)	-12.84, (-18.54, -7.14)		144.8, (137.37, 152.23)	121.24, (117.37, 125.11)
Max red meat 60g/day, plant-based meat alternatives	-14.03, (-24.93, -3.13)	-12.92, (-18.62, -7.22)		144.67, (137.24, 152.1)	121.16, (117.29, 125.03)
Max red meat 31g/day, plant-based meat alternatives	-14.56, (-25.47, -3.65)	-13.29, (-18.99, -7.59)		144.14, (136.68, 151.6)	120.78, (116.9, 124.66)
SDG, chicken	-13.45, (-24.35, -2.55)	-12.63, (-18.33, -6.93)		145.25, (137.81, 152.69)	121.45, (117.58, 125.32)
Max red meat 60g/day, chicken	-13.48, (-24.38, -2.58)	-12.65, (-18.35, -6.95)		145.22, (137.78, 152.66)	121.42, (117.54, 125.3)
Max red meat 31g/day, chicken	-13.64, (-24.56, -2.72)	-12.76, (-18.46, -7.06)		145.06, (137.59, 152.53)	121.31, (117.43, 125.19)

## Sheet: Selenium
	Change in Selenium, ug, (95% UI), Men	Change in Selenium, ug, (95% UI), Women		Selenium, ug, (95% UI), Men	Selenium, ug, (95% UI), Women
Baseline				46.25, (44.4, 48.1)	37.38, (36.2, 38.56)
CCC 2030	-3.19, (-5.75, -0.63)	-2.4, (-4.04, -0.76)		43.06, (41.29, 44.83)	34.98, (33.84, 36.12)
CCC 2050	-4.99, (-7.52, -2.46)	-3.66, (-5.29, -2.03)		41.26, (39.53, 42.99)	33.72, (32.6, 34.84)
SDG	-2.71, (-5.25, -0.17)	-1.58, (-3.24, 0.08)		43.54, (41.8, 45.28)	35.8, (34.64, 36.96)
Max red meat 60g/day	-3.08, (-5.61, -0.55)	-1.83, (-3.49, -0.17)		43.17, (41.43, 44.91)	35.55, (34.39, 36.71)
Max red meat 31g/day	-4.59, (-7.12, -2.06)	-2.89, (-4.55, -1.23)		41.66, (39.93, 43.39)	34.49, (33.33, 35.65)
CCC 2030, pulses & legumes	-2.16, (-4.73, 0.41)	-1.55, (-3.2, 0.1)		44.09, (42.3, 45.88)	35.83, (34.68, 36.98)
CCC 2050, pulses & legumes	-3.56, (-6.11, -1.01)	-2.54, (-4.18, -0.9)		42.69, (40.94, 44.44)	34.84, (33.71, 35.97)
SDG, pulses & legumes	-1.7, (-4.25, 0.85)	-0.88, (-2.54, 0.78)		44.55, (42.79, 46.31)	36.51, (35.34, 37.68)
Max red meat 60g/day, pulses & legumes	-1.98, (-4.53, 0.57)	-1.06, (-2.72, 0.6)		44.27, (42.51, 46.03)	36.32, (35.15, 37.49)
Max red meat 31g/day, pulses & legumes	-3.08, (-5.62, -0.54)	-1.84, (-3.5, -0.18)		43.17, (41.42, 44.92)	35.54, (34.37, 36.71)
CCC 2030, vegetables	-2.51, (-5.08, 0.06)	-1.8, (-3.45, -0.15)		43.74, (41.96, 45.52)	35.59, (34.44, 36.74)
CCC 2050, vegetables	-4.18, (-6.72, -1.64)	-2.97, (-4.61, -1.33)		42.07, (40.33, 43.81)	34.42, (33.29, 35.55)
SDG, vegetables	-2.03, (-4.58, 0.52)	-1.03, (-2.69, 0.63)		44.22, (42.47, 45.97)	36.35, (35.18, 37.52)
Max red meat 60g/day, vegetables	-2.38, (-4.92, 0.16)	-1.25, (-2.91, 0.41)		43.87, (42.12, 45.62)	36.13, (34.96, 37.3)
Max red meat 31g/day, vegetables	-3.74, (-6.28, -1.2)	-2.22, (-3.88, -0.56)		42.51, (40.77, 44.25)	35.16, (33.99, 36.33)
CCC 2030, egg	1.99, (-0.64, 4.62)	1.33, (-0.36, 3.02)		48.24, (46.37, 50.11)	38.72, (37.51, 39.93)
CCC 2050, egg	3.7, (1.05, 6.35)	2.51, (0.81, 4.21)		49.95, (48.05, 51.85)	39.89, (38.66, 41.12)
SDG, egg	2.21, (-0.48, 4.9)	0.9, (-0.79, 2.59)		48.46, (46.5, 50.42)	38.28, (37.07, 39.49)
Max red meat 60g/day, egg	2.72, (0.02, 5.42)	1.23, (-0.47, 2.93)		48.97, (47.01, 50.93)	38.61, (37.39, 39.83)
Max red meat 31g/day, egg	4.78, (2.09, 7.47)	2.71, (1.0, 4.42)		51.03, (49.07, 52.99)	40.09, (38.86, 41.32)
CCC 2030, non-smoked oily fish	1.67, (-0.95, 4.29)	1.11, (-0.58, 2.8)		47.92, (46.06, 49.78)	38.49, (37.29, 39.69)
CCC 2050, non-smoked oily fish	3.13, (0.49, 5.77)	2.12, (0.42, 3.82)		49.38, (47.49, 51.27)	39.5, (38.28, 40.72)
SDG, non-smoked oily fish	1.91, (-0.77, 4.59)	0.76, (-0.93, 2.45)		48.16, (46.22, 50.1)	38.15, (36.95, 39.35)
Max red meat 60g/day, non-smoked oily fish	2.35, (-0.33, 5.03)	1.05, (-0.64, 2.74)		48.6, (46.66, 50.54)	38.44, (37.23, 39.65)
Max red meat 31g/day, non-smoked oily fish	4.17, (1.5, 6.84)	2.35, (0.65, 4.05)		50.42, (48.49, 52.35)	39.74, (38.51, 40.97)
CCC 2030, plant-based meat alternatives	-1.92, (-4.49, 0.65)	-1.39, (-3.04, 0.26)		44.33, (42.54, 46.12)	35.99, (34.84, 37.14)
CCC 2050, plant-based meat alternatives	-3.15, (-5.7, -0.6)	-2.25, (-3.89, -0.61)		43.1, (41.34, 44.86)	35.13, (33.99, 36.27)
SDG, plant-based meat alternatives	-1.48, (-4.04, 1.08)	-0.78, (-2.44, 0.88)		44.77, (43.0, 46.54)	36.61, (35.44, 37.78)
Max red meat 60g/day, plant-based meat alternatives	-1.71, (-4.26, 0.84)	-0.93, (-2.59, 0.73)		44.54, (42.78, 46.3)	36.45, (35.28, 37.62)
Max red meat 31g/day, plant-based meat alternatives	-2.63, (-5.18, -0.08)	-1.58, (-3.24, 0.08)		43.62, (41.87, 45.37)	35.8, (34.63, 36.97)
SDG, chicken	0.68, (-1.94, 3.3)	0.21, (-1.46, 1.88)		46.93, (45.07, 48.79)	37.59, (36.4, 38.78)
Max red meat 60g/day, chicken	0.88, (-1.74, 3.5)	0.34, (-1.34, 2.02)		47.13, (45.27, 48.99)	37.72, (36.53, 38.91)
Max red meat 31g/day, chicken	1.7, (-0.91, 4.31)	0.93, (-0.75, 2.61)		47.95, (46.1, 49.8)	38.31, (37.12, 39.5)

## Sheet: Zinc
	Change in Zinc, mg, (95% UI), Men	Change in Zinc, mg, (95% UI), Women		Zinc, mg, (95% UI), Men	Zinc, mg, (95% UI), Women
Baseline				8.34, (8.09, 8.59)	7.12, (6.94, 7.3)
CCC 2030	-0.79, (-1.13, -0.45)	-0.64, (-0.88, -0.4)		7.55, (7.32, 7.78)	6.48, (6.31, 6.65)
CCC 2050	-1.13, (-1.46, -0.8)	-0.87, (-1.11, -0.63)		7.21, (6.99, 7.43)	6.24, (6.08, 6.4)
SDG	-0.9, (-1.23, -0.57)	-0.59, (-0.83, -0.35)		7.45, (7.24, 7.66)	6.53, (6.36, 6.7)
Max red meat 60g/day	-1.01, (-1.33, -0.69)	-0.66, (-0.9, -0.42)		7.33, (7.12, 7.54)	6.45, (6.28, 6.62)
Max red meat 31g/day	-1.48, (-1.8, -1.16)	-1.0, (-1.24, -0.76)		6.87, (6.66, 7.08)	6.11, (5.95, 6.27)
CCC 2030, pulses & legumes	-0.54, (-0.88, -0.2)	-0.43, (-0.67, -0.19)		7.81, (7.58, 8.04)	6.68, (6.51, 6.85)
CCC 2050, pulses & legumes	-0.76, (-1.1, -0.42)	-0.59, (-0.83, -0.35)		7.58, (7.35, 7.81)	6.52, (6.35, 6.69)
SDG, pulses & legumes	-0.65, (-0.98, -0.32)	-0.43, (-0.67, -0.19)		7.69, (7.47, 7.91)	6.69, (6.52, 6.86)
Max red meat 60g/day, pulses & legumes	-0.74, (-1.07, -0.41)	-0.48, (-0.72, -0.24)		7.61, (7.39, 7.83)	6.63, (6.46, 6.8)
Max red meat 31g/day, pulses & legumes	-1.09, (-1.42, -0.76)	-0.74, (-0.98, -0.5)		7.26, (7.04, 7.48)	6.37, (6.2, 6.54)
CCC 2030, vegetables	-0.62, (-0.96, -0.28)	-0.49, (-0.73, -0.25)		7.72, (7.49, 7.95)	6.62, (6.45, 6.79)
CCC 2050, vegetables	-0.91, (-1.24, -0.58)	-0.7, (-0.94, -0.46)		7.43, (7.21, 7.65)	6.42, (6.26, 6.58)
SDG, vegetables	-0.73, (-1.06, -0.4)	-0.46, (-0.7, -0.22)		7.61, (7.4, 7.82)	6.65, (6.48, 6.82)
Max red meat 60g/day, vegetables	-0.83, (-1.16, -0.5)	-0.53, (-0.77, -0.29)		7.51, (7.3, 7.72)	6.58, (6.41, 6.75)
Max red meat 31g/day, vegetables	-1.25, (-1.58, -0.92)	-0.84, (-1.08, -0.6)		7.09, (6.88, 7.3)	6.28, (6.11, 6.45)
CCC 2030, egg	-0.46, (-0.8, -0.12)	-0.38, (-0.62, -0.14)		7.88, (7.65, 8.11)	6.74, (6.57, 6.91)
CCC 2050, egg	-0.63, (-0.97, -0.29)	-0.5, (-0.74, -0.26)		7.72, (7.49, 7.95)	6.62, (6.45, 6.79)
SDG, egg	-0.58, (-0.91, -0.25)	-0.39, (-0.64, -0.14)		7.77, (7.55, 7.99)	6.72, (6.55, 6.89)
Max red meat 60g/day, egg	-0.65, (-0.98, -0.32)	-0.44, (-0.68, -0.2)		7.7, (7.48, 7.92)	6.67, (6.5, 6.84)
Max red meat 31g/day, egg	-0.94, (-1.27, -0.61)	-0.66, (-0.9, -0.42)		7.4, (7.18, 7.62)	6.46, (6.29, 6.63)
CCC 2030, non-smoked oily fish	-0.56, (-0.9, -0.22)	-0.45, (-0.69, -0.21)		7.79, (7.56, 8.02)	6.67, (6.5, 6.84)
CCC 2050, non-smoked oily fish	-0.8, (-1.14, -0.46)	-0.62, (-0.86, -0.38)		7.55, (7.32, 7.78)	6.5, (6.33, 6.67)
SDG, non-smoked oily fish	-0.67, (-1.0, -0.34)	-0.43, (-0.67, -0.19)		7.68, (7.46, 7.9)	6.68, (6.51, 6.85)
Max red meat 60g/day, non-smoked oily fish	-0.76, (-1.09, -0.43)	-0.5, (-0.74, -0.26)		7.58, (7.36, 7.8)	6.62, (6.45, 6.79)
Max red meat 31g/day, non-smoked oily fish	-1.13, (-1.46, -0.8)	-0.77, (-1.01, -0.53)		7.22, (7.0, 7.44)	6.35, (6.18, 6.52)
CCC 2030, plant-based meat alternatives	-0.08, (-0.43, 0.27)	-0.11, (-0.36, 0.14)		8.27, (8.02, 8.52)	7.0, (6.83, 7.17)
CCC 2050, plant-based meat alternatives	0.04, (-0.31, 0.39)	-0.03, (-0.28, 0.22)		8.39, (8.14, 8.64)	7.08, (6.9, 7.26)
SDG, plant-based meat alternatives	-0.21, (-0.56, 0.14)	-0.23, (-0.48, 0.02)		8.13, (7.88, 8.38)	6.89, (6.71, 7.07)
Max red meat 60g/day, plant-based meat alternatives	-0.21, (-0.56, 0.14)	-0.23, (-0.48, 0.02)		8.13, (7.88, 8.38)	6.89, (6.71, 7.07)
Max red meat 31g/day, plant-based meat alternatives	-0.22, (-0.57, 0.13)	-0.24, (-0.49, 0.01)		8.13, (7.88, 8.38)	6.88, (6.7, 7.06)
SDG, chicken	-0.65, (-0.98, -0.32)	-0.42, (-0.66, -0.18)		7.7, (7.48, 7.92)	6.69, (6.52, 6.86)
Max red meat 60g/day, chicken	-0.73, (-1.06, -0.4)	-0.48, (-0.72, -0.24)		7.61, (7.39, 7.83)	6.63, (6.46, 6.8)
Max red meat 31g/day, chicken	-1.08, (-1.41, -0.75)	-0.74, (-0.98, -0.5)		7.26, (7.04, 7.48)	6.38, (6.21, 6.55)

## Sheet: Vitamin B12
	Change in Vitamin B12, ug, (95% UI), Men	Change in Vitamin B12, ug, (95% UI), Women		Vitamin B12, ug, (95% UI), Men	Vitamin B12, ug, (95% UI), Women
Baseline				5.0, (4.7, 5.3)	4.06, (3.89, 4.23)
CCC 2030	-0.64, (-1.04, -0.24)	-0.51, (-0.74, -0.28)		4.37, (4.1, 4.64)	3.55, (3.39, 3.71)
CCC 2050	-0.8, (-1.2, -0.4)	-0.61, (-0.84, -0.38)		4.21, (3.95, 4.47)	3.45, (3.3, 3.6)
SDG	-0.7, (-1.1, -0.3)	-0.51, (-0.74, -0.28)		4.31, (4.04, 4.58)	3.55, (3.4, 3.7)
Max red meat 60g/day	-0.77, (-1.17, -0.37)	-0.55, (-0.78, -0.32)		4.24, (3.98, 4.5)	3.52, (3.38, 3.66)
Max red meat 31g/day	-1.02, (-1.41, -0.63)	-0.71, (-0.93, -0.49)		3.98, (3.74, 4.22)	3.35, (3.21, 3.49)
CCC 2030, pulses & legumes	-0.53, (-0.94, -0.12)	-0.42, (-0.66, -0.18)		4.47, (4.2, 4.74)	3.65, (3.49, 3.81)
CCC 2050, pulses & legumes	-0.69, (-1.09, -0.29)	-0.52, (-0.75, -0.29)		4.31, (4.05, 4.57)	3.55, (3.4, 3.7)
SDG, pulses & legumes	-0.6, (-1.01, -0.19)	-0.42, (-0.65, -0.19)		4.41, (4.14, 4.68)	3.65, (3.5, 3.8)
Max red meat 60g/day, pulses & legumes	-0.66, (-1.06, -0.26)	-0.45, (-0.68, -0.22)		4.34, (4.08, 4.6)	3.61, (3.46, 3.76)
Max red meat 31g/day, pulses & legumes	-0.92, (-1.31, -0.53)	-0.61, (-0.83, -0.39)		4.09, (3.85, 4.33)	3.45, (3.31, 3.59)
CCC 2030, vegetables	-0.54, (-0.95, -0.13)	-0.42, (-0.66, -0.18)		4.47, (4.2, 4.74)	3.64, (3.48, 3.8)
CCC 2050, vegetables	-0.7, (-1.1, -0.3)	-0.52, (-0.75, -0.29)		4.3, (4.04, 4.56)	3.54, (3.39, 3.69)
SDG, vegetables	-0.6, (-1.01, -0.19)	-0.42, (-0.65, -0.19)		4.4, (4.13, 4.67)	3.64, (3.49, 3.79)
Max red meat 60g/day, vegetables	-0.67, (-1.07, -0.27)	-0.46, (-0.69, -0.23)		4.34, (4.08, 4.6)	3.61, (3.46, 3.76)
Max red meat 31g/day, vegetables	-0.93, (-1.32, -0.54)	-0.62, (-0.84, -0.4)		4.08, (3.84, 4.32)	3.44, (3.3, 3.58)
CCC 2030, egg	-0.08, (-0.49, 0.33)	-0.1, (-0.34, 0.14)		4.93, (4.65, 5.21)	3.96, (3.8, 4.12)
CCC 2050, egg	0.11, (-0.29, 0.51)	0.04, (-0.2, 0.28)		5.11, (4.84, 5.38)	4.1, (3.94, 4.26)
SDG, egg	-0.16, (-0.58, 0.26)	-0.22, (-0.45, 0.01)		4.84, (4.55, 5.13)	3.84, (3.69, 3.99)
Max red meat 60g/day, egg	-0.14, (-0.55, 0.27)	-0.2, (-0.43, 0.03)		4.86, (4.58, 5.14)	3.86, (3.71, 4.01)
Max red meat 31g/day, egg	-0.05, (-0.45, 0.35)	-0.11, (-0.34, 0.12)		4.95, (4.68, 5.22)	3.95, (3.8, 4.1)
CCC 2030, non-smoked oily fish	0.32, (-0.09, 0.73)	0.18, (-0.06, 0.42)		5.32, (5.04, 5.6)	4.24, (4.07, 4.41)
CCC 2050, non-smoked oily fish	0.8, (0.39, 1.21)	0.52, (0.28, 0.76)		5.8, (5.52, 6.08)	4.58, (4.41, 4.75)
SDG, non-smoked oily fish	0.21, (-0.22, 0.64)	-0.05, (-0.29, 0.19)		5.21, (4.9, 5.52)	4.01, (3.85, 4.17)
Max red meat 60g/day, non-smoked oily fish	0.3, (-0.13, 0.73)	0.02, (-0.22, 0.26)		5.31, (5.0, 5.62)	4.08, (3.92, 4.24)
Max red meat 31g/day, non-smoked oily fish	0.7, (0.28, 1.12)	0.32, (0.08, 0.56)		5.7, (5.4, 6.0)	4.38, (4.22, 4.54)
CCC 2030, plant-based meat alternatives	-0.5, (-0.91, -0.09)	-0.39, (-0.63, -0.15)		4.51, (4.24, 4.78)	3.67, (3.51, 3.83)
CCC 2050, plant-based meat alternatives	-0.63, (-1.03, -0.23)	-0.47, (-0.7, -0.24)		4.37, (4.11, 4.63)	3.59, (3.44, 3.74)
SDG, plant-based meat alternatives	-0.56, (-0.97, -0.15)	-0.4, (-0.63, -0.17)		4.44, (4.17, 4.71)	3.66, (3.51, 3.81)
Max red meat 60g/day, plant-based meat alternatives	-0.62, (-1.02, -0.22)	-0.43, (-0.66, -0.2)		4.38, (4.12, 4.64)	3.63, (3.48, 3.78)
Max red meat 31g/day, plant-based meat alternatives	-0.85, (-1.24, -0.46)	-0.57, (-0.79, -0.35)		4.15, (3.9, 4.4)	3.49, (3.35, 3.63)
SDG, chicken	-0.6, (-1.01, -0.19)	-0.42, (-0.65, -0.19)		4.4, (4.13, 4.67)	3.64, (3.49, 3.79)
Max red meat 60g/day, chicken	-0.67, (-1.07, -0.27)	-0.46, (-0.69, -0.23)		4.34, (4.08, 4.6)	3.61, (3.46, 3.76)
Max red meat 31g/day, chicken	-0.93, (-1.32, -0.54)	-0.62, (-0.84, -0.4)		4.08, (3.84, 4.32)	3.44, (3.3, 3.58)

## Sheet: Fat
	Change in Fat, g, (95% UI), Men	Change in Fat, g, (95% UI), Women		Fat, g, (95% UI), Men	Fat, g, (95% UI), Women
Baseline				67.64, (65.43, 69.85)	57.66, (56.28, 59.04)
CCC 2030	-5.57, (-8.57, -2.57)	-4.5, (-6.39, -2.61)		62.07, (60.04, 64.1)	53.17, (51.88, 54.46)
CCC 2050	-6.93, (-9.92, -3.94)	-5.37, (-7.25, -3.49)		60.71, (58.7, 62.72)	52.3, (51.02, 53.58)
SDG	-6.01, (-8.97, -3.05)	-4.34, (-6.21, -2.47)		61.63, (59.65, 63.61)	53.32, (52.05, 54.59)
Max red meat 60g/day	-6.48, (-9.44, -3.52)	-4.63, (-6.5, -2.76)		61.16, (59.19, 63.13)	53.04, (51.77, 54.31)
Max red meat 31g/day	-8.37, (-11.34, -5.4)	-5.86, (-7.73, -3.99)		59.27, (57.29, 61.25)	51.8, (50.54, 53.06)
CCC 2030, pulses & legumes	-2.66, (-5.72, 0.4)	-2.17, (-4.07, -0.27)		64.99, (62.87, 67.11)	55.49, (54.18, 56.8)
CCC 2050, pulses & legumes	-3.11, (-6.17, -0.05)	-2.41, (-4.3, -0.52)		64.53, (62.42, 66.64)	55.25, (53.95, 56.55)
SDG, pulses & legumes	-3.17, (-6.21, -0.13)	-2.35, (-4.24, -0.46)		64.47, (62.38, 66.56)	55.32, (54.03, 56.61)
Max red meat 60g/day, pulses & legumes	-3.41, (-6.45, -0.37)	-2.48, (-4.37, -0.59)		64.23, (62.14, 66.32)	55.18, (53.89, 56.47)
Max red meat 31g/day, pulses & legumes	-4.38, (-7.43, -1.33)	-3.06, (-4.95, -1.17)		63.27, (61.17, 65.37)	54.6, (53.32, 55.88)
CCC 2030, vegetables	-3.77, (-6.82, -0.72)	-2.95, (-4.85, -1.05)		63.87, (61.77, 65.97)	54.71, (53.41, 56.01)
CCC 2050, vegetables	-5.06, (-8.1, -2.02)	-3.77, (-5.66, -1.88)		62.58, (60.5, 64.66)	53.89, (52.6, 55.18)
SDG, vegetables	-4.22, (-7.23, -1.21)	-2.82, (-4.7, -0.94)		63.42, (61.37, 65.47)	54.84, (53.56, 56.12)
Max red meat 60g/day, vegetables	-4.68, (-7.69, -1.67)	-3.1, (-4.98, -1.22)		62.97, (60.93, 65.01)	54.57, (53.29, 55.85)
Max red meat 31g/day, vegetables	-6.49, (-9.51, -3.47)	-4.28, (-6.16, -2.4)		61.15, (59.09, 63.21)	53.38, (52.1, 54.66)
CCC 2030, egg	-1.24, (-4.32, 1.84)	-1.19, (-3.1, 0.72)		66.4, (64.25, 68.55)	56.48, (55.17, 57.79)
CCC 2050, egg	-0.62, (-3.71, 2.47)	-0.69, (-2.59, 1.21)		67.02, (64.87, 69.17)	56.98, (55.67, 58.29)
SDG, egg	-1.83, (-4.92, 1.26)	-1.74, (-3.64, 0.16)		65.81, (63.65, 67.97)	55.93, (54.62, 57.24)
Max red meat 60g/day, egg	-1.8, (-4.89, 1.29)	-1.7, (-3.6, 0.2)		65.84, (63.68, 68.0)	55.97, (54.66, 57.28)
Max red meat 31g/day, egg	-1.69, (-4.79, 1.41)	-1.5, (-3.4, 0.4)		65.95, (63.77, 68.13)	56.16, (54.85, 57.47)
CCC 2030, non-smoked oily fish	-0.93, (-4.01, 2.15)	-0.97, (-2.88, 0.94)		66.71, (64.56, 68.86)	56.69, (55.37, 58.01)
CCC 2050, non-smoked oily fish	-0.08, (-3.17, 3.01)	-0.31, (-2.22, 1.6)		67.56, (65.39, 69.73)	57.36, (56.04, 58.68)
SDG, non-smoked oily fish	-1.54, (-4.64, 1.56)	-1.6, (-3.51, 0.31)		66.1, (63.93, 68.27)	56.06, (54.74, 57.38)
Max red meat 60g/day, non-smoked oily fish	-1.45, (-4.55, 1.65)	-1.52, (-3.43, 0.39)		66.19, (64.01, 68.37)	56.14, (54.82, 57.46)
Max red meat 31g/day, non-smoked oily fish	-1.1, (-4.22, 2.02)	-1.16, (-3.07, 0.75)		66.54, (64.34, 68.74)	56.5, (55.18, 57.82)
CCC 2030, plant-based meat alternatives	-2.54, (-5.6, 0.52)	-2.1, (-4.0, -0.2)		65.1, (62.98, 67.22)	55.57, (54.26, 56.88)
CCC 2050, plant-based meat alternatives	-2.91, (-5.97, 0.15)	-2.28, (-4.17, -0.39)		64.73, (62.62, 66.84)	55.39, (54.09, 56.69)
SDG, plant-based meat alternatives	-3.06, (-6.1, -0.02)	-2.3, (-4.19, -0.41)		64.58, (62.49, 66.67)	55.37, (54.08, 56.66)
Max red meat 60g/day, plant-based meat alternatives	-3.28, (-6.32, -0.24)	-2.42, (-4.31, -0.53)		64.36, (62.27, 66.45)	55.25, (53.96, 56.54)
Max red meat 31g/day, plant-based meat alternatives	-4.16, (-7.21, -1.11)	-2.94, (-4.83, -1.05)		63.48, (61.37, 65.59)	54.73, (53.44, 56.02)
SDG, chicken	-3.92, (-6.94, -0.9)	-2.68, (-4.57, -0.79)		63.73, (61.67, 65.79)	54.98, (53.69, 56.27)
Max red meat 60g/day, chicken	-4.31, (-7.33, -1.29)	-2.92, (-4.8, -1.04)		63.33, (61.28, 65.38)	54.75, (53.47, 56.03)
Max red meat 31g/day, chicken	-5.88, (-8.91, -2.85)	-3.93, (-5.81, -2.05)		61.76, (59.69, 63.83)	53.74, (52.46, 55.02)

## Sheet: Carbohydrate
	Change in Carbohydrate, g, (95% UI), Men	Change in Carbohydrate, g, (95% UI), Women		Carbohydrate, g, (95% UI), Men	Carbohydrate, g, (95% UI), Women
Baseline				217.58, (211.05, 224.11)	184.06, (180.14, 187.98)
CCC 2030	-2.52, (-11.72, 6.68)	-2.3, (-7.82, 3.22)		215.06, (208.58, 221.54)	181.76, (177.87, 185.65)
CCC 2050	-2.73, (-11.94, 6.48)	-2.44, (-7.96, 3.08)		214.85, (208.36, 221.34)	181.63, (177.75, 185.51)
SDG	-2.65, (-11.84, 6.54)	-2.31, (-7.83, 3.21)		214.93, (208.46, 221.4)	181.76, (177.88, 185.64)
Max red meat 60g/day	-2.73, (-11.92, 6.46)	-2.36, (-7.88, 3.16)		214.85, (208.38, 221.32)	181.71, (177.83, 185.59)
Max red meat 31g/day	-3.06, (-12.26, 6.14)	-2.58, (-8.09, 2.93)		214.52, (208.04, 221.0)	181.48, (177.61, 185.35)
CCC 2030, pulses & legumes	1.67, (-7.58, 10.92)	0.96, (-4.58, 6.5)		219.25, (212.7, 225.8)	185.03, (181.12, 188.94)
CCC 2050, pulses & legumes	3.4, (-5.87, 12.67)	2.18, (-3.36, 7.72)		220.98, (214.4, 227.56)	186.24, (182.33, 190.15)
SDG, pulses & legumes	1.4, (-7.91, 10.71)	0.27, (-5.27, 5.81)		218.98, (212.35, 225.61)	184.33, (180.42, 188.24)
Max red meat 60g/day, pulses & legumes	1.8, (-7.51, 11.11)	0.54, (-5.0, 6.08)		219.38, (212.74, 226.02)	184.6, (180.68, 188.52)
Max red meat 31g/day, pulses & legumes	3.44, (-5.88, 12.76)	1.72, (-3.83, 7.27)		221.02, (214.36, 227.68)	185.78, (181.85, 189.71)
CCC 2030, vegetables	0.0, (-9.23, 9.23)	-0.2, (-5.74, 5.34)		217.58, (211.05, 224.11)	183.86, (179.95, 187.77)
CCC 2050, vegetables	0.47, (-8.77, 9.71)	0.14, (-5.39, 5.67)		218.05, (211.51, 224.59)	184.21, (180.3, 188.12)
SDG, vegetables	-0.18, (-9.42, 9.06)	-0.45, (-5.98, 5.08)		217.4, (210.86, 223.94)	183.62, (179.71, 187.53)
Max red meat 60g/day, vegetables	-0.09, (-9.34, 9.16)	-0.38, (-5.91, 5.15)		217.49, (210.94, 224.04)	183.68, (179.77, 187.59)
Max red meat 31g/day, vegetables	0.27, (-8.99, 9.53)	-0.12, (-5.65, 5.41)		217.85, (211.29, 224.41)	183.95, (180.05, 187.85)
CCC 2030, egg	-0.87, (-10.1, 8.36)	-0.81, (-6.34, 4.72)		216.71, (210.19, 223.23)	183.26, (179.35, 187.17)
CCC 2050, egg	-1.05, (-10.28, 8.18)	-0.92, (-6.45, 4.61)		216.53, (210.01, 223.05)	183.14, (179.24, 187.04)
SDG, egg	-1.0, (-10.21, 8.21)	-0.82, (-6.35, 4.71)		216.58, (210.08, 223.08)	183.24, (179.34, 187.14)
Max red meat 60g/day, egg	-1.08, (-10.3, 8.14)	-0.87, (-6.4, 4.66)		216.5, (210.0, 223.0)	183.2, (179.3, 187.1)
Max red meat 31g/day, egg	-1.38, (-10.61, 7.85)	-1.07, (-6.6, 4.46)		216.2, (209.68, 222.72)	183.0, (179.11, 186.89)
CCC 2030, non-smoked oily fish	-0.61, (-9.84, 8.62)	-0.63, (-6.16, 4.9)		216.97, (210.45, 223.49)	183.44, (179.53, 187.35)
CCC 2050, non-smoked oily fish	-0.6, (-9.83, 8.63)	-0.61, (-6.14, 4.92)		216.98, (210.45, 223.51)	183.46, (179.56, 187.36)
SDG, non-smoked oily fish	-0.76, (-9.98, 8.46)	-0.71, (-6.24, 4.82)		216.82, (210.31, 223.33)	183.35, (179.45, 187.25)
Max red meat 60g/day, non-smoked oily fish	-0.79, (-10.02, 8.44)	-0.72, (-6.25, 4.81)		216.79, (210.27, 223.31)	183.34, (179.44, 187.24)
Max red meat 31g/day, non-smoked oily fish	-0.89, (-10.13, 8.35)	-0.79, (-6.32, 4.74)		216.69, (210.16, 223.22)	183.28, (179.38, 187.18)
CCC 2030, plant-based meat alternatives	0.59, (-8.65, 9.83)	0.21, (-5.33, 5.75)		218.17, (211.63, 224.71)	184.27, (180.36, 188.18)
CCC 2050, plant-based meat alternatives	1.5, (-7.75, 10.75)	0.86, (-4.68, 6.4)		219.08, (212.52, 225.64)	184.92, (181.01, 188.83)
SDG, plant-based meat alternatives	0.38, (-8.89, 9.65)	-0.2, (-5.74, 5.34)		217.96, (211.39, 224.53)	183.87, (179.96, 187.78)
Max red meat 60g/day, plant-based meat alternatives	0.58, (-8.69, 9.85)	-0.06, (-5.6, 5.48)		218.16, (211.58, 224.74)	184.01, (180.1, 187.92)
Max red meat 31g/day, plant-based meat alternatives	1.39, (-7.89, 10.67)	0.53, (-5.01, 6.07)		218.97, (212.37, 225.57)	184.59, (180.68, 188.5)
SDG, chicken	-1.04, (-10.25, 8.17)	-0.84, (-6.37, 4.69)		216.54, (210.04, 223.04)	183.23, (179.33, 187.13)
Max red meat 60g/day, chicken	-1.12, (-10.33, 8.09)	-0.89, (-6.42, 4.64)		216.46, (209.96, 222.96)	183.18, (179.28, 187.08)
Max red meat 31g/day, chicken	-1.45, (-10.68, 7.78)	-1.11, (-6.64, 4.42)		216.13, (209.61, 222.65)	182.95, (179.06, 186.84)

[truncated: 52 more sheets: Free Sugars, Sodium, Haem Iron, Non-haem Iron, Thiamin, Saturated fatty acids, Trans fatty acids, Cis monounsaturated fatty acids, n-6 fatty acids, n-3 fatty acids, Vitamin D, Vitamin A, Riboflavin, Potassium, Vitamin B6, Cholesterol, Magnesium, Phosphorus, Copper, Choloride …]
