# Supplementary material for: Impact of reducing meat and dairy consumption on nutrient intake, health, cost of diets and the environment: A simulation among adults in Scotland
Source: Research Square preprint supplement (doi:10.21203/rs.3.rs-5820769/v1), 2025-02-04
Supplement: Supplementary file 6 [file 7fcd8cb69ff985570f585f1a.xlsx]

## Sheet: Food group contributions
	Eutrophication	Greenhouse gas emissions	Land use	Water use	Cost	Energykcal	Proteing	Fatg	Carbohydrateg	Sodiummg	Potassiummg	Calciummg	Magnesiummg	Phosphorusmg	Ironmg	Haemironmg	Nonhaemironmg	Coppermg	Zincmg	Chloridemg	Retinol	TotCarotene	Alpcarotene	Betacarotene	BCryptoxanthin	VitaminA	VitaminD	VitaminEmg	Thiaminmg	Riboflavinmg	Niacinequivalentmg	VitaminB6mg	VitaminB12	Folate	Pantothenicacidmg	Biotin	VitaminCmg	Alcoholg	Waterg	Totalsugarsg	Othersugarsg	Starchg	Glucoseg	Fructoseg	Sucroseg	Maltoseg	Lactoseg	FreeSugarsg	AOACFibreg
Vegetables, potatoes	5.3	3.4	7	4	10.2	8.7	7.1	8.4	10.6	6.8	17.1	6.8	11.9	8.1	11.7	1.2	12.3	13	9.2	9.4	3.7	32.1	25.9	32.2	26	20.2	3	16.2	15	6.5	7.4	12	1.6	20.1	10.7	5.5	27.2	0	5.8	6.6	17.3	13.7	12.1	12.7	7	1.1	2	2.3	21.3
Cereals and Cereal Products	15	11	16.4	27	17.5	31.1	24.5	22.4	42.6	27.3	15.7	26.7	26.2	24.7	38.6	2.3	40.3	31	27.4	26.4	15.1	10.4	7.5	10.6	9.9	12.1	19.6	23.8	31.8	20.2	26.9	18.9	11.3	27.7	21.1	22.6	5.2	0.1	5.1	21.4	18.8	57.5	14.9	16.5	25.5	56	14.4	29.5	38.3
Fat Spreads	0.4	0.4	0.4	0.2	0.7	2.4	0	6.9	0	1.5	0.1	0.1	0	0.1	0	0	0	0	0.1	1.4	16.4	5.9	2.5	6.2	0	10.5	9.1	5.4	0	0.3	0	0.5	1.2	0.2	0.1	0	0	0	0.1	0	0	0	0	0	0	0	2.4	0	0
Milk and Milk Products	16.2	13.4	13.6	11.7	7.4	9.2	13.3	12.6	6.2	9.5	11.2	31.3	9.5	18	2.1	0	2.2	5.7	14.7	10	30.6	7	0.5	7.4	0.1	18	10.8	4.5	6.6	26.2	1.8	10.2	34.5	8.4	19.9	15.2	8.7	0	7.9	14.3	16.2	0.8	2.9	2.9	7.5	3	58.5	7.9	1.6
Non-alcoholic beverages	10.4	9.8	7.4	8.7	16.7	3.7	3	1	5.7	2.1	15	7.9	12.8	7.9	3.8	0	4	7	2.2	2.4	2	4.4	4.3	4	9.5	2.9	0.3	1.4	5.5	9.3	11.2	5.6	5.3	6.2	6.1	17.5	23.6	0	63.8	13.4	1.1	0.2	14.6	15.9	15.8	1.2	6.5	16.8	0.5
Fruit	2.3	4	2.4	2.9	5.1	4	1.6	1.2	7.1	0.4	7.5	1.7	5.4	1.7	3.3	0	3.5	6.9	1.7	3	0	5.2	17.3	4.4	11.8	1.8	0	4.5	6.9	3.1	3.2	9.9	0	6.2	5.3	4.9	18	0	3.6	15.2	1.5	0.9	25	28.3	11	0.1	0	0.4	8.8
Meat and Meat Products	34.6	38.3	37	29.9	16.6	14.1	26	18.5	6.5	19.2	13.1	6.8	11.5	17.1	15.5	62.1	12.6	12	23	17.2	6.5	12.7	9.1	12.8	13.1	9.4	25.5	11.7	14.5	12.7	27.5	19.8	18.7	8.2	17.1	9.9	7	0	4.3	4	12.5	8.6	8.7	6.1	3.4	7.6	2.2	4.9	9.5
Nuts and Seeds	0.4	0.8	1.3	0.9	0.7	1.3	1.1	2.5	0.3	0.4	0.9	0.5	2.2	1.3	1.2	0	1.3	2.6	1.6	0.4	0	0.1	0	0.1	0	0	0	2.4	1.3	0.5	1.5	1.2	0	1.1	1	3.3	0	0	0	0.4	0.1	0.3	0.1	0.1	1.1	0	0	0	1.4
Misc	2.2	1.7	2.4	1.5	4.9	3.4	3.2	4.2	3	10.6	4.1	3.1	3.2	2.8	4.5	1.6	4.5	4.5	3.3	9.3	3.7	14.3	14.3	14.3	11.1	9.7	2.8	7.2	4.9	3.2	3.3	4.4	2.1	3.5	2.9	2.9	4.6	0	2.5	4.4	12.3	2.4	5.9	6.1	5.3	0.7	3.8	6.3	5
Sugar, Preserves and Confectionery	1.9	1.3	2.7	2.4	2.7	4.6	1.1	3.6	6.4	0.8	1.5	2	2.1	1.5	2.3	0	2.4	3.1	1.5	0.7	2.3	0.7	1.8	0.7	0	1.3	0.7	1.6	0.7	2.3	0.4	0.7	2	0.5	1.2	1.2	1	0.5	0.1	13.7	5.9	1	7.9	5.7	19.7	6.7	5.6	22.3	1.8
Sandwiches	4.8	4.4	4.2	5	0.6	6.5	8.4	6.8	6.2	10	4	7.4	6	7.1	7.1	9.6	7.1	6.8	7.9	9.5	7.9	3.7	0.6	3.9	1.6	5.9	8.6	4.7	8.2	4.8	7.8	6.5	5.9	7.9	6.1	4.9	0.6	0	1.2	2.1	0	8.5	2.9	2.5	1	12.8	0.6	3.3	7.4
Savoury Snacks	1.1	0.3	0.9	0.2	1.7	2.7	1	3.8	2.7	2.8	3.7	0.8	2.3	1.3	1.8	0	1.9	1.9	1.3	2.7	0	1.3	1.2	1.2	1.1	0.7	0	6.7	1.1	1.5	2.2	2.5	0	2.6	1.6	0.5	3.3	0	0	0.7	0.1	4	0.3	0.3	1.6	0	0.4	0.2	2.6
Fish and Fish Dishes	1.6	6.6	0.6	1.4	4.3	2.7	5.5	3.6	1.1	4	2.4	1.4	2.4	3.7	1.9	12.8	1.4	1.8	2.4	3.4	2	0.6	0.4	0.6	2	1.2	6.5	4.7	2.1	2	4.5	3.2	8.9	1.3	2.3	1.7	0.4	0	0.8	0.4	0.6	1.7	0.5	0.3	0.3	2	0.6	0.3	1.3
Alcoholic beverages	1.4	2.7	1.4	0.7	9	3.1	0.4	0	1.3	0.5	2.3	1.3	3	1.4	2.7	0	2.8	1.9	0.3	0.7	0	0	0	0	0	0	0	0	0	2	1.9	1.9	0	2.2	0.4	3	0	28.8	4	3.1	0.3	0	4	2.3	0.5	5.6	0	5.2	0
Eggs and Egg Dishes	2.5	2	2.2	3.5	2.1	2.6	3.8	4.6	0.4	4	1.3	2.2	1.3	3.3	3.6	0.2	3.8	1.7	3.4	3.4	9.5	1.6	0.1	1.6	0.7	6.3	12.8	5.2	1.5	5.4	0.4	2.6	8.5	3.6	4.1	6.9	0.4	0	0.8	0.3	0.7	0.6	0.2	0.2	0.3	0.4	1.2	0.2	0.4
Percentage contribution of each food group in SHeS 2021 to each environmental indicator, cost and to nutrient intake. SHeS: Scottish Health Survey
[truncated: 10 more columns]
