# Supplementary material for: Impact of reducing meat and dairy consumption on nutrient intake, health, cost of diets and the environment: A simulation among adults in Scotland
Source: Research Square preprint supplement (doi:10.21203/rs.3.rs-5820769/v1), 2025-02-04
Supplement: Supplementary file 7 [file adf151910b56b065a568ad1e.xlsx]

## Sheet: Energy
	Change in Energy, kcal, (95% UI), Overall		Energy, kcal, (95% UI), Overall
Baseline			1629.7, (1599.79, 1659.61)
CCC 2030	-81.48, (-122.99, -39.97)		1548.22, (1519.44, 1577.0)
CCC 2050	-104.45, (-145.85, -63.05)		1525.25, (1496.63, 1553.87)
SDG	-78.34, (-119.5, -37.18)		1551.36, (1523.09, 1579.63)
Max red meat 60g/day	-84.7, (-125.81, -43.59)		1545.0, (1516.8, 1573.2)
Max red meat 31g/day	-111.02, (-152.2, -69.84)		1518.68, (1490.38, 1546.98)
CCC 2030, pulses & legumes	-37.76, (-79.55, 4.03)		1591.94, (1562.76, 1621.12)
CCC 2050, pulses & legumes	-44.95, (-86.69, -3.21)		1584.75, (1555.64, 1613.86)
SDG, pulses & legumes	-38.75, (-80.4, 2.9)		1590.95, (1561.97, 1619.93)
Max red meat 60g/day, pulses & legumes	-41.24, (-82.87, 0.39)		1588.46, (1559.51, 1617.41)
Max red meat 31g/day, pulses & legumes	-51.36, (-93.03, -9.69)		1578.34, (1549.33, 1607.35)
CCC 2030, vegetables	-53.98, (-95.68, -12.28)		1575.72, (1546.66, 1604.78)
CCC 2050, vegetables	-73.35, (-114.95, -31.75)		1556.35, (1527.44, 1585.26)
SDG, vegetables	-51.79, (-93.18, -10.4)		1577.91, (1549.31, 1606.51)
Max red meat 60g/day, vegetables	-57.27, (-98.62, -15.92)		1572.43, (1543.89, 1600.97)
Max red meat 31g/day, vegetables	-79.88, (-121.29, -38.47)		1549.82, (1521.19, 1578.45)
CCC 2030, egg	-30.36, (-72.2, 11.48)		1599.33, (1570.08, 1628.58)
CCC 2050, egg	-32.02, (-73.84, 9.8)		1597.68, (1568.46, 1626.9)
SDG, egg	-32.81, (-74.6, 8.98)		1596.88, (1567.7, 1626.06)
Max red meat 60g/day, egg	-33.93, (-75.71, 7.85)		1595.76, (1566.59, 1624.93)
Max red meat 31g/day, egg	-38.36, (-80.18, 3.46)		1591.34, (1562.12, 1620.56)
CCC 2030, non-smoked oily fish	-21.15, (-63.04, 20.74)		1608.55, (1579.22, 1637.88)
CCC 2050, non-smoked oily fish	-15.89, (-57.81, 26.03)		1613.81, (1584.44, 1643.18)
SDG, non-smoked oily fish	-25.41, (-67.38, 16.56)		1604.29, (1574.85, 1633.73)
Max red meat 60g/day, non-smoked oily fish	-24.83, (-66.81, 17.15)		1604.87, (1575.42, 1634.32)
Max red meat 31g/day, non-smoked oily fish	-22.16, (-64.19, 19.87)		1607.54, (1578.02, 1637.06)
CCC 2030, plant-based meat alternatives	-36.49, (-78.29, 5.31)		1593.21, (1564.01, 1622.41)
CCC 2050, plant-based meat alternatives	-42.73, (-84.48, -0.98)		1586.97, (1557.84, 1616.1)
SDG, plant-based meat alternatives	-37.73, (-79.4, 3.94)		1591.97, (1562.96, 1620.98)
Max red meat 60g/day, plant-based meat alternatives	-39.98, (-81.64, 1.68)		1589.72, (1560.73, 1618.71)
Max red meat 31g/day, plant-based meat alternatives	-49.13, (-90.83, -7.43)		1580.57, (1551.52, 1609.62)
SDG, chicken	-36.54, (-78.24, 5.16)		1593.16, (1564.11, 1622.21)
Max red meat 60g/day, chicken	-38.51, (-80.19, 3.17)		1591.18, (1562.15, 1620.21)
Max red meat 31g/day, chicken	-46.51, (-88.23, -4.79)		1583.19, (1554.1, 1612.28)

## Sheet: Protein
	Change in Protein, g, (95% UI), Overall		Protein, g, (95% UI), Overall
Baseline			67.2, (65.78, 68.62)
CCC 2030	-6.77, (-8.69, -4.85)		60.42, (59.12, 61.72)
CCC 2050	-9.85, (-11.74, -7.96)		57.34, (56.09, 58.59)
SDG	-5.61, (-7.53, -3.69)		61.58, (60.28, 62.88)
Max red meat 60g/day	-6.29, (-8.21, -4.37)		60.91, (59.62, 62.2)
Max red meat 31g/day	-9.09, (-11.0, -7.18)		58.11, (56.82, 59.4)
CCC 2030, pulses & legumes	-5.18, (-7.12, -3.24)		62.01, (60.69, 63.33)
CCC 2050, pulses & legumes	-7.57, (-9.48, -5.66)		59.63, (58.35, 60.91)
SDG, pulses & legumes	-4.2, (-6.14, -2.26)		62.99, (61.67, 64.31)
Max red meat 60g/day, pulses & legumes	-4.71, (-6.64, -2.78)		62.49, (61.17, 63.81)
Max red meat 31g/day, pulses & legumes	-6.8, (-8.73, -4.87)		60.4, (59.09, 61.71)
CCC 2030, vegetables	-5.79, (-7.72, -3.86)		61.4, (60.09, 62.71)
CCC 2050, vegetables	-8.63, (-10.53, -6.73)		58.56, (57.29, 59.83)
SDG, vegetables	-4.69, (-6.62, -2.76)		62.5, (61.19, 63.81)
Max red meat 60g/day, vegetables	-5.31, (-7.24, -3.38)		61.89, (60.58, 63.2)
Max red meat 31g/day, vegetables	-7.87, (-9.79, -5.95)		59.33, (58.03, 60.63)
CCC 2030, egg	-4.02, (-5.97, -2.07)		63.18, (61.84, 64.52)
CCC 2050, egg	-5.52, (-7.45, -3.59)		61.67, (60.36, 62.98)
SDG, egg	-3.27, (-5.23, -1.31)		63.93, (62.58, 65.28)
Max red meat 60g/day, egg	-3.56, (-5.51, -1.61)		63.64, (62.3, 64.98)
Max red meat 31g/day, egg	-4.74, (-6.69, -2.79)		62.45, (61.12, 63.78)
CCC 2030, non-smoked oily fish	-2.52, (-4.49, -0.55)		64.68, (63.31, 66.05)
CCC 2050, non-smoked oily fish	-2.9, (-4.86, -0.94)		64.29, (62.93, 65.65)
SDG, non-smoked oily fish	-2.06, (-4.04, -0.08)		65.13, (63.74, 66.52)
Max red meat 60g/day, non-smoked oily fish	-2.08, (-4.06, -0.1)		65.12, (63.73, 66.51)
Max red meat 31g/day, non-smoked oily fish	-2.11, (-4.09, -0.13)		65.08, (63.69, 66.47)
CCC 2030, plant-based meat alternatives	-4.23, (-6.18, -2.28)		62.96, (61.62, 64.3)
CCC 2050, plant-based meat alternatives	-5.9, (-7.83, -3.97)		61.29, (59.98, 62.6)
SDG, plant-based meat alternatives	-3.44, (-5.39, -1.49)		63.76, (62.42, 65.1)
Max red meat 60g/day, plant-based meat alternatives	-3.77, (-5.72, -1.82)		63.43, (62.09, 64.77)
Max red meat 31g/day, plant-based meat alternatives	-5.12, (-7.06, -3.18)		62.07, (60.74, 63.4)
SDG, chicken	-0.81, (-2.83, 1.21)		66.38, (64.93, 67.83)
Max red meat 60g/day, chicken	-0.54, (-2.57, 1.49)		66.65, (65.2, 68.1)
Max red meat 31g/day, chicken	0.62, (-1.42, 2.66)		67.81, (66.35, 69.27)

## Sheet: Calcium
	Change in Calcium, mg, (95% UI), Overall		Calcium, mg, (95% UI), Overall
Baseline			803.37, (783.72, 823.02)
CCC 2030	-85.17, (-111.32, -59.02)		718.2, (700.94, 735.46)
CCC 2050	-87.36, (-113.53, -61.19)		716.01, (698.72, 733.3)
SDG	-85.36, (-111.45, -59.27)		718.01, (700.85, 735.17)
Max red meat 60g/day	-86.08, (-112.18, -59.98)		717.28, (700.1, 734.46)
Max red meat 31g/day	-89.09, (-115.24, -62.94)		714.28, (697.03, 731.53)
CCC 2030, pulses & legumes	-47.12, (-73.82, -20.42)		756.25, (738.18, 774.32)
CCC 2050, pulses & legumes	-44.37, (-71.07, -17.67)		759.0, (740.92, 777.08)
SDG, pulses & legumes	-48.61, (-75.36, -21.86)		754.76, (736.61, 772.91)
Max red meat 60g/day, pulses & legumes	-48.12, (-74.89, -21.35)		755.25, (737.08, 773.42)
Max red meat 31g/day, pulses & legumes	-46.05, (-72.85, -19.25)		757.32, (739.09, 775.55)
CCC 2030, vegetables	-48.43, (-75.13, -21.73)		754.94, (736.86, 773.02)
CCC 2050, vegetables	-46.66, (-73.37, -19.95)		756.71, (738.62, 774.8)
SDG, vegetables	-49.66, (-76.39, -22.93)		753.71, (735.59, 771.83)
Max red meat 60g/day, vegetables	-49.41, (-76.16, -22.66)		753.96, (735.82, 772.1)
Max red meat 31g/day, vegetables	-48.35, (-75.14, -21.56)		755.02, (736.82, 773.22)
CCC 2030, egg	-45.12, (-71.81, -18.43)		758.25, (740.19, 776.31)
CCC 2050, egg	-40.88, (-67.57, -14.19)		762.49, (744.43, 780.55)
SDG, egg	-47.01, (-73.79, -20.23)		756.36, (738.16, 774.56)
Max red meat 60g/day, egg	-46.15, (-72.95, -19.35)		757.22, (739.0, 775.44)
Max red meat 31g/day, egg	-42.54, (-69.37, -15.71)		760.83, (742.56, 779.1)
CCC 2030, non-smoked oily fish	-46.44, (-73.14, -19.74)		756.93, (738.86, 775.0)
CCC 2050, non-smoked oily fish	-43.19, (-69.89, -16.49)		760.18, (742.11, 778.25)
SDG, non-smoked oily fish	-48.07, (-74.83, -21.31)		755.3, (737.13, 773.47)
Max red meat 60g/day, non-smoked oily fish	-47.45, (-74.23, -20.67)		755.92, (737.73, 774.11)
Max red meat 31g/day, non-smoked oily fish	-44.86, (-71.67, -18.05)		758.51, (740.27, 776.75)
CCC 2030, plant-based meat alternatives	-30.48, (-57.13, -3.83)		772.89, (754.89, 790.89)
CCC 2050, plant-based meat alternatives	-15.25, (-41.89, 11.39)		788.11, (770.13, 806.09)
SDG, plant-based meat alternatives	-35.24, (-62.29, -8.19)		768.12, (749.54, 786.7)
Max red meat 60g/day, plant-based meat alternatives	-31.68, (-58.76, -4.6)		771.69, (753.07, 790.31)
Max red meat 31g/day, plant-based meat alternatives	-16.81, (-43.91, 10.29)		786.56, (767.9, 805.22)
SDG, chicken	-53.13, (-79.8, -26.46)		750.24, (732.21, 768.27)
Max red meat 60g/day, chicken	-53.67, (-80.35, -26.99)		749.69, (731.64, 767.74)
Max red meat 31g/day, chicken	-55.94, (-82.67, -29.21)		747.43, (729.31, 765.55)

## Sheet: Iron
	Change in Iron, mg, (95% UI), Overall		Iron, mg, (95% UI), Overall
Baseline			9.54, (9.32, 9.76)
CCC 2030	-0.21, (-0.52, 0.1)		9.33, (9.11, 9.55)
CCC 2050	-0.35, (-0.66, -0.04)		9.18, (8.96, 9.4)
SDG	-0.21, (-0.52, 0.1)		9.32, (9.1, 9.54)
Max red meat 60g/day	-0.26, (-0.57, 0.05)		9.27, (9.05, 9.49)
Max red meat 31g/day	-0.46, (-0.77, -0.15)		9.08, (8.86, 9.3)
CCC 2030, pulses & legumes	0.19, (-0.12, 0.5)		9.72, (9.5, 9.94)
CCC 2050, pulses & legumes	0.23, (-0.08, 0.54)		9.77, (9.55, 9.99)
SDG, pulses & legumes	0.13, (-0.18, 0.44)		9.67, (9.45, 9.89)
Max red meat 60g/day, pulses & legumes	0.13, (-0.18, 0.44)		9.67, (9.45, 9.89)
Max red meat 31g/day, pulses & legumes	0.13, (-0.18, 0.44)		9.67, (9.45, 9.89)
CCC 2030, vegetables	0.04, (-0.27, 0.35)		9.58, (9.36, 9.8)
CCC 2050, vegetables	-0.01, (-0.32, 0.3)		9.52, (9.3, 9.74)
SDG, vegetables	0.02, (-0.29, 0.33)		9.55, (9.33, 9.77)
Max red meat 60g/day, vegetables	-0.01, (-0.32, 0.3)		9.53, (9.31, 9.75)
Max red meat 31g/day, vegetables	-0.12, (-0.43, 0.19)		9.42, (9.2, 9.64)
CCC 2030, egg	0.22, (-0.09, 0.53)		9.75, (9.53, 9.97)
CCC 2050, egg	0.29, (-0.02, 0.6)		9.83, (9.61, 10.05)
SDG, egg	0.16, (-0.15, 0.47)		9.69, (9.47, 9.91)
Max red meat 60g/day, egg	0.16, (-0.15, 0.47)		9.7, (9.48, 9.92)
Max red meat 31g/day, egg	0.19, (-0.12, 0.5)		9.72, (9.5, 9.94)
CCC 2030, non-smoked oily fish	0.02, (-0.29, 0.33)		9.56, (9.34, 9.78)
CCC 2050, non-smoked oily fish	-0.05, (-0.36, 0.26)		9.48, (9.26, 9.7)
SDG, non-smoked oily fish	0.0, (-0.31, 0.31)		9.54, (9.32, 9.76)
Max red meat 60g/day, non-smoked oily fish	-0.03, (-0.34, 0.28)		9.51, (9.29, 9.73)
Max red meat 31g/day, non-smoked oily fish	-0.16, (-0.47, 0.15)		9.38, (9.16, 9.6)
CCC 2030, plant-based meat alternatives	0.19, (-0.12, 0.5)		9.72, (9.5, 9.94)
CCC 2050, plant-based meat alternatives	0.24, (-0.07, 0.55)		9.77, (9.55, 9.99)
SDG, plant-based meat alternatives	0.13, (-0.18, 0.44)		9.67, (9.45, 9.89)
Max red meat 60g/day, plant-based meat alternatives	0.13, (-0.18, 0.44)		9.67, (9.45, 9.89)
Max red meat 31g/day, plant-based meat alternatives	0.13, (-0.18, 0.44)		9.67, (9.45, 9.89)
SDG, chicken	-0.02, (-0.33, 0.29)		9.51, (9.29, 9.73)
Max red meat 60g/day, chicken	-0.06, (-0.37, 0.25)		9.48, (9.26, 9.7)
Max red meat 31g/day, chicken	-0.21, (-0.52, 0.1)		9.33, (9.11, 9.55)

## Sheet: Iodine
	Change in Iodine, ug, (95% UI), Overall		Iodine, ug, (95% UI), Overall
Baseline			145.96, (141.26, 150.66)
CCC 2030	-15.96, (-22.36, -9.56)		130.01, (125.67, 134.35)
CCC 2050	-16.87, (-23.27, -10.47)		129.09, (124.74, 133.44)
SDG	-15.72, (-22.11, -9.33)		130.25, (125.92, 134.58)
Max red meat 60g/day	-15.96, (-22.35, -9.57)		130.01, (125.68, 134.34)
Max red meat 31g/day	-16.96, (-23.36, -10.56)		129.01, (124.66, 133.36)
CCC 2030, pulses & legumes	-13.72, (-20.15, -7.29)		132.25, (127.86, 136.64)
CCC 2050, pulses & legumes	-14.29, (-20.73, -7.85)		131.67, (127.27, 136.07)
SDG, pulses & legumes	-13.56, (-19.99, -7.13)		132.4, (128.02, 136.78)
Max red meat 60g/day, pulses & legumes	-13.72, (-20.15, -7.29)		132.25, (127.86, 136.64)
Max red meat 31g/day, pulses & legumes	-14.37, (-20.81, -7.93)		131.59, (127.19, 135.99)
CCC 2030, vegetables	-13.88, (-20.31, -7.45)		132.09, (127.7, 136.48)
CCC 2050, vegetables	-14.57, (-21.01, -8.13)		131.39, (126.99, 135.79)
SDG, vegetables	-13.69, (-20.12, -7.26)		132.27, (127.89, 136.65)
Max red meat 60g/day, vegetables	-13.88, (-20.31, -7.45)		132.09, (127.7, 136.48)
Max red meat 31g/day, vegetables	-14.65, (-21.09, -8.21)		131.31, (126.91, 135.71)
CCC 2030, egg	-5.67, (-12.08, 0.74)		140.3, (135.93, 144.67)
CCC 2050, egg	-0.21, (-6.63, 6.21)		145.76, (141.39, 150.13)
SDG, egg	-7.1, (-13.62, -0.58)		138.87, (134.36, 143.38)
Max red meat 60g/day, egg	-5.77, (-12.29, 0.75)		140.2, (135.68, 144.72)
Max red meat 31g/day, egg	-0.22, (-6.74, 6.3)		145.74, (141.22, 150.26)
CCC 2030, non-smoked oily fish	-10.98, (-17.4, -4.56)		134.99, (130.61, 139.37)
CCC 2050, non-smoked oily fish	-9.5, (-15.92, -3.08)		136.47, (132.09, 140.85)
SDG, non-smoked oily fish	-11.36, (-17.81, -4.91)		134.6, (130.19, 139.01)
Max red meat 60g/day, non-smoked oily fish	-11.01, (-17.46, -4.56)		134.95, (130.53, 139.37)
Max red meat 31g/day, non-smoked oily fish	-9.55, (-16.0, -3.1)		136.41, (131.99, 140.83)
CCC 2030, plant-based meat alternatives	-13.45, (-19.88, -7.02)		132.51, (128.12, 136.9)
CCC 2050, plant-based meat alternatives	-13.83, (-20.26, -7.4)		132.14, (127.75, 136.53)
SDG, plant-based meat alternatives	-13.35, (-19.78, -6.92)		132.61, (128.22, 137.0)
Max red meat 60g/day, plant-based meat alternatives	-13.46, (-19.89, -7.03)		132.51, (128.12, 136.9)
Max red meat 31g/day, plant-based meat alternatives	-13.9, (-20.34, -7.46)		132.06, (127.66, 136.46)
SDG, chicken	-13.02, (-19.45, -6.59)		132.94, (128.55, 137.33)
Max red meat 60g/day, chicken	-13.05, (-19.48, -6.62)		132.91, (128.52, 137.3)
Max red meat 31g/day, chicken	-13.19, (-19.63, -6.75)		132.78, (128.38, 137.18)

## Sheet: Selenium
	Change in Selenium, ug, (95% UI), Overall		Selenium, ug, (95% UI), Overall
Baseline			41.66, (40.41, 42.91)
CCC 2030	-2.78, (-4.53, -1.03)		38.88, (37.67, 40.09)
CCC 2050	-4.3, (-6.03, -2.57)		37.36, (36.17, 38.55)
SDG	-2.12, (-3.86, -0.38)		39.54, (38.33, 40.75)
Max red meat 60g/day	-2.43, (-4.17, -0.69)		39.23, (38.02, 40.44)
Max red meat 31g/day	-3.71, (-5.45, -1.97)		37.95, (36.74, 39.16)
CCC 2030, pulses & legumes	-1.84, (-3.59, -0.09)		39.82, (38.6, 41.04)
CCC 2050, pulses & legumes	-3.03, (-4.77, -1.29)		38.63, (37.43, 39.83)
SDG, pulses & legumes	-1.27, (-3.02, 0.48)		40.39, (39.17, 41.61)
Max red meat 60g/day, pulses & legumes	-1.5, (-3.25, 0.25)		40.16, (38.95, 41.37)
Max red meat 31g/day, pulses & legumes	-2.44, (-4.18, -0.7)		39.23, (38.02, 40.44)
CCC 2030, vegetables	-2.14, (-3.89, -0.39)		39.52, (38.3, 40.74)
CCC 2050, vegetables	-3.55, (-5.29, -1.81)		38.11, (36.91, 39.31)
SDG, vegetables	-1.51, (-3.26, 0.24)		40.15, (38.94, 41.36)
Max red meat 60g/day, vegetables	-1.79, (-3.53, -0.05)		39.87, (38.66, 41.08)
Max red meat 31g/day, vegetables	-2.96, (-4.7, -1.22)		38.71, (37.5, 39.92)
CCC 2030, egg	1.65, (-0.13, 3.43)		43.32, (42.06, 44.58)
CCC 2050, egg	3.08, (1.29, 4.87)		44.75, (43.47, 46.03)
SDG, egg	1.53, (-0.27, 3.33)		43.2, (41.91, 44.49)
Max red meat 60g/day, egg	1.95, (0.15, 3.75)		43.61, (42.31, 44.91)
Max red meat 31g/day, egg	3.71, (1.91, 5.51)		45.37, (44.07, 46.67)
CCC 2030, non-smoked oily fish	1.38, (-0.4, 3.16)		43.04, (41.78, 44.3)
CCC 2050, non-smoked oily fish	2.61, (0.82, 4.4)		44.27, (43.0, 45.54)
SDG, non-smoked oily fish	1.32, (-0.48, 3.12)		42.98, (41.69, 44.27)
Max red meat 60g/day, non-smoked oily fish	1.68, (-0.12, 3.48)		43.35, (42.06, 44.64)
Max red meat 31g/day, non-smoked oily fish	3.23, (1.43, 5.03)		44.89, (43.61, 46.17)
CCC 2030, plant-based meat alternatives	-1.65, (-3.4, 0.1)		40.02, (38.8, 41.24)
CCC 2050, plant-based meat alternatives	-2.69, (-4.43, -0.95)		38.98, (37.77, 40.19)
SDG, plant-based meat alternatives	-1.12, (-2.87, 0.63)		40.55, (39.33, 41.77)
Max red meat 60g/day, plant-based meat alternatives	-1.31, (-3.06, 0.44)		40.36, (39.14, 41.58)
Max red meat 31g/day, plant-based meat alternatives	-2.09, (-3.83, -0.35)		39.57, (38.36, 40.78)
SDG, chicken	0.43, (-1.34, 2.2)		42.1, (40.84, 43.36)
Max red meat 60g/day, chicken	0.6, (-1.17, 2.37)		42.26, (41.01, 43.51)
Max red meat 31g/day, chicken	1.3, (-0.47, 3.07)		42.97, (41.72, 44.22)

## Sheet: Zinc
	Change in Zinc, mg, (95% UI), Overall		Zinc, mg, (95% UI), Overall
Baseline			7.71, (7.55, 7.87)
CCC 2030	-0.71, (-0.93, -0.49)		7.0, (6.85, 7.15)
CCC 2050	-1.0, (-1.21, -0.79)		6.71, (6.56, 6.86)
SDG	-0.74, (-0.95, -0.53)		6.97, (6.83, 7.11)
Max red meat 60g/day	-0.83, (-1.04, -0.62)		6.88, (6.74, 7.02)
Max red meat 31g/day	-1.23, (-1.44, -1.02)		6.48, (6.34, 6.62)
CCC 2030, pulses & legumes	-0.48, (-0.7, -0.26)		7.22, (7.07, 7.37)
CCC 2050, pulses & legumes	-0.68, (-0.9, -0.46)		7.03, (6.88, 7.18)
SDG, pulses & legumes	-0.53, (-0.74, -0.32)		7.17, (7.02, 7.32)
Max red meat 60g/day, pulses & legumes	-0.61, (-0.82, -0.4)		7.1, (6.95, 7.25)
Max red meat 31g/day, pulses & legumes	-0.91, (-1.12, -0.7)		6.8, (6.65, 6.95)
CCC 2030, vegetables	-0.56, (-0.78, -0.34)		7.15, (7.0, 7.3)
CCC 2050, vegetables	-0.8, (-1.01, -0.59)		6.91, (6.76, 7.06)
SDG, vegetables	-0.59, (-0.8, -0.38)		7.12, (6.98, 7.26)
Max red meat 60g/day, vegetables	-0.68, (-0.89, -0.47)		7.03, (6.89, 7.17)
Max red meat 31g/day, vegetables	-1.04, (-1.25, -0.83)		6.67, (6.53, 6.81)
CCC 2030, egg	-0.42, (-0.64, -0.2)		7.29, (7.14, 7.44)
CCC 2050, egg	-0.56, (-0.78, -0.34)		7.15, (7.0, 7.3)
SDG, egg	-0.48, (-0.7, -0.26)		7.23, (7.08, 7.38)
Max red meat 60g/day, egg	-0.54, (-0.76, -0.32)		7.17, (7.02, 7.32)
Max red meat 31g/day, egg	-0.79, (-1.01, -0.57)		6.91, (6.76, 7.06)
CCC 2030, non-smoked oily fish	-0.5, (-0.72, -0.28)		7.21, (7.06, 7.36)
CCC 2050, non-smoked oily fish	-0.7, (-0.92, -0.48)		7.0, (6.85, 7.15)
SDG, non-smoked oily fish	-0.55, (-0.76, -0.34)		7.16, (7.01, 7.31)
Max red meat 60g/day, non-smoked oily fish	-0.62, (-0.83, -0.41)		7.09, (6.95, 7.23)
Max red meat 31g/day, non-smoked oily fish	-0.94, (-1.15, -0.73)		6.77, (6.62, 6.92)
CCC 2030, plant-based meat alternatives	-0.1, (-0.32, 0.12)		7.61, (7.45, 7.77)
CCC 2050, plant-based meat alternatives	0.0, (-0.22, 0.22)		7.71, (7.55, 7.87)
SDG, plant-based meat alternatives	-0.22, (-0.44, 0.0)		7.49, (7.33, 7.65)
Max red meat 60g/day, plant-based meat alternatives	-0.22, (-0.44, 0.0)		7.49, (7.33, 7.65)
Max red meat 31g/day, plant-based meat alternatives	-0.23, (-0.46, -0.0)		7.48, (7.32, 7.64)
SDG, chicken	-0.53, (-0.74, -0.32)		7.18, (7.03, 7.33)
Max red meat 60g/day, chicken	-0.6, (-0.81, -0.39)		7.1, (6.95, 7.25)
Max red meat 31g/day, chicken	-0.91, (-1.12, -0.7)		6.8, (6.65, 6.95)

## Sheet: Vitamin B12
	Change in Vitamin B12, ug, (95% UI), Overall		Vitamin B12, ug, (95% UI), Overall
Baseline			4.52, (4.33, 4.71)
CCC 2030	-0.57, (-0.82, -0.32)		3.95, (3.79, 4.11)
CCC 2050	-0.7, (-0.94, -0.46)		3.81, (3.66, 3.96)
SDG	-0.6, (-0.85, -0.35)		3.92, (3.76, 4.08)
Max red meat 60g/day	-0.65, (-0.89, -0.41)		3.87, (3.72, 4.02)
Max red meat 31g/day	-0.86, (-1.09, -0.63)		3.66, (3.52, 3.8)
CCC 2030, pulses & legumes	-0.47, (-0.72, -0.22)		4.04, (3.87, 4.21)
CCC 2050, pulses & legumes	-0.6, (-0.84, -0.36)		3.92, (3.76, 4.08)
SDG, pulses & legumes	-0.5, (-0.75, -0.25)		4.01, (3.85, 4.17)
Max red meat 60g/day, pulses & legumes	-0.55, (-0.79, -0.31)		3.96, (3.8, 4.12)
Max red meat 31g/day, pulses & legumes	-0.76, (-0.99, -0.53)		3.76, (3.62, 3.9)
CCC 2030, vegetables	-0.48, (-0.73, -0.23)		4.04, (3.87, 4.21)
CCC 2050, vegetables	-0.61, (-0.85, -0.37)		3.91, (3.75, 4.07)
SDG, vegetables	-0.51, (-0.76, -0.26)		4.01, (3.85, 4.17)
Max red meat 60g/day, vegetables	-0.56, (-0.8, -0.32)		3.96, (3.8, 4.12)
Max red meat 31g/day, vegetables	-0.77, (-1.0, -0.54)		3.75, (3.61, 3.89)
CCC 2030, egg	-0.09, (-0.34, 0.16)		4.43, (4.26, 4.6)
CCC 2050, egg	0.07, (-0.17, 0.31)		4.59, (4.43, 4.75)
SDG, egg	-0.19, (-0.44, 0.06)		4.32, (4.15, 4.49)
Max red meat 60g/day, egg	-0.17, (-0.42, 0.08)		4.34, (4.18, 4.5)
Max red meat 31g/day, egg	-0.08, (-0.32, 0.16)		4.44, (4.29, 4.59)
CCC 2030, non-smoked oily fish	0.24, (-0.01, 0.49)		4.76, (4.59, 4.93)
CCC 2050, non-smoked oily fish	0.65, (0.4, 0.9)		5.17, (5.01, 5.33)
SDG, non-smoked oily fish	0.07, (-0.19, 0.33)		4.59, (4.41, 4.77)
Max red meat 60g/day, non-smoked oily fish	0.15, (-0.11, 0.41)		4.67, (4.49, 4.85)
Max red meat 31g/day, non-smoked oily fish	0.5, (0.25, 0.75)		5.02, (4.85, 5.19)
CCC 2030, plant-based meat alternatives	-0.44, (-0.69, -0.19)		4.07, (3.9, 4.24)
CCC 2050, plant-based meat alternatives	-0.55, (-0.79, -0.31)		3.97, (3.81, 4.13)
SDG, plant-based meat alternatives	-0.48, (-0.73, -0.23)		4.04, (3.88, 4.2)
Max red meat 60g/day, plant-based meat alternatives	-0.53, (-0.77, -0.29)		3.99, (3.83, 4.15)
Max red meat 31g/day, plant-based meat alternatives	-0.71, (-0.94, -0.48)		3.81, (3.67, 3.95)
SDG, chicken	-0.51, (-0.76, -0.26)		4.01, (3.85, 4.17)
Max red meat 60g/day, chicken	-0.56, (-0.8, -0.32)		3.96, (3.8, 4.12)
Max red meat 31g/day, chicken	-0.77, (-1.0, -0.54)		3.75, (3.61, 3.89)

## Sheet: Fat
	Change in Fat, g, (95% UI), Overall		Fat, g, (95% UI), Overall
Baseline			62.48, (61.12, 63.84)
CCC 2030	-5.01, (-6.87, -3.15)		57.47, (56.2, 58.74)
CCC 2050	-6.12, (-7.97, -4.27)		56.36, (55.1, 57.62)
SDG	-5.15, (-6.99, -3.31)		57.33, (56.09, 58.57)
Max red meat 60g/day	-5.52, (-7.36, -3.68)		56.96, (55.72, 58.2)
Max red meat 31g/day	-7.08, (-8.93, -5.23)		55.41, (54.15, 56.67)
CCC 2030, pulses & legumes	-2.41, (-4.29, -0.53)		60.07, (58.77, 61.37)
CCC 2050, pulses & legumes	-2.75, (-4.63, -0.87)		59.73, (58.44, 61.02)
SDG, pulses & legumes	-2.74, (-4.61, -0.87)		59.74, (58.45, 61.03)
Max red meat 60g/day, pulses & legumes	-2.93, (-4.8, -1.06)		59.55, (58.26, 60.84)
Max red meat 31g/day, pulses & legumes	-3.69, (-5.57, -1.81)		58.79, (57.49, 60.09)
CCC 2030, vegetables	-3.35, (-5.23, -1.47)		59.13, (57.84, 60.42)
CCC 2050, vegetables	-4.4, (-6.27, -2.53)		58.08, (56.79, 59.37)
SDG, vegetables	-3.5, (-5.36, -1.64)		58.98, (57.71, 60.25)
Max red meat 60g/day, vegetables	-3.86, (-5.72, -2.0)		58.62, (57.35, 59.89)
Max red meat 31g/day, vegetables	-5.35, (-7.22, -3.48)		57.13, (55.84, 58.42)
CCC 2030, egg	-1.21, (-3.1, 0.68)		61.27, (59.96, 62.58)
CCC 2050, egg	-0.66, (-2.55, 1.23)		61.82, (60.51, 63.13)
SDG, egg	-1.78, (-3.67, 0.11)		60.7, (59.38, 62.02)
Max red meat 60g/day, egg	-1.75, (-3.65, 0.15)		60.73, (59.41, 62.05)
Max red meat 31g/day, egg	-1.59, (-3.49, 0.31)		60.89, (59.56, 62.22)
CCC 2030, non-smoked oily fish	-0.95, (-2.84, 0.94)		61.53, (60.22, 62.84)
CCC 2050, non-smoked oily fish	-0.2, (-2.09, 1.69)		62.28, (60.97, 63.59)
SDG, non-smoked oily fish	-1.57, (-3.47, 0.33)		60.91, (59.58, 62.24)
Max red meat 60g/day, non-smoked oily fish	-1.49, (-3.39, 0.41)		60.99, (59.66, 62.32)
Max red meat 31g/day, non-smoked oily fish	-1.13, (-3.04, 0.78)		61.35, (60.01, 62.69)
CCC 2030, plant-based meat alternatives	-2.31, (-4.19, -0.43)		60.17, (58.87, 61.47)
CCC 2050, plant-based meat alternatives	-2.58, (-4.46, -0.7)		59.9, (58.6, 61.2)
SDG, plant-based meat alternatives	-2.67, (-4.55, -0.79)		59.81, (58.52, 61.1)
Max red meat 60g/day, plant-based meat alternatives	-2.83, (-4.71, -0.95)		59.65, (58.36, 60.94)
Max red meat 31g/day, plant-based meat alternatives	-3.53, (-5.41, -1.65)		58.95, (57.65, 60.25)
SDG, chicken	-3.28, (-5.15, -1.41)		59.2, (57.92, 60.48)
Max red meat 60g/day, chicken	-3.59, (-5.45, -1.73)		58.89, (57.61, 60.17)
Max red meat 31g/day, chicken	-4.87, (-6.75, -2.99)		57.61, (56.32, 58.9)

## Sheet: Carbohydrate
	Change in Carbohydrate, g, (95% UI), Overall		Carbohydrate, g, (95% UI), Overall
Baseline			200.25, (196.58, 203.92)
CCC 2030	-2.41, (-7.59, 2.77)		197.84, (194.19, 201.49)
CCC 2050	-2.58, (-7.76, 2.6)		197.67, (194.02, 201.32)
SDG	-2.47, (-7.64, 2.7)		197.77, (194.13, 201.41)
Max red meat 60g/day	-2.54, (-7.71, 2.63)		197.71, (194.07, 201.35)
Max red meat 31g/day	-2.81, (-7.98, 2.36)		197.43, (193.78, 201.08)
CCC 2030, pulses & legumes	1.31, (-3.88, 6.5)		201.55, (197.88, 205.22)
CCC 2050, pulses & legumes	2.77, (-2.43, 7.97)		203.02, (199.34, 206.7)
SDG, pulses & legumes	0.81, (-4.4, 6.02)		201.06, (197.36, 204.76)
Max red meat 60g/day, pulses & legumes	1.15, (-4.07, 6.37)		201.4, (197.69, 205.11)
Max red meat 31g/day, pulses & legumes	2.55, (-2.67, 7.77)		202.8, (199.09, 206.51)
CCC 2030, vegetables	-0.1, (-5.28, 5.08)		200.14, (196.48, 203.8)
CCC 2050, vegetables	0.3, (-4.89, 5.49)		200.55, (196.89, 204.21)
SDG, vegetables	-0.32, (-5.51, 4.87)		199.93, (196.26, 203.6)
Max red meat 60g/day, vegetables	-0.24, (-5.43, 4.95)		200.0, (196.33, 203.67)
Max red meat 31g/day, vegetables	0.07, (-5.12, 5.26)		200.32, (196.65, 203.99)
CCC 2030, egg	-0.84, (-6.02, 4.34)		199.41, (195.75, 203.07)
CCC 2050, egg	-0.98, (-6.16, 4.2)		199.26, (195.6, 202.92)
SDG, egg	-0.91, (-6.09, 4.27)		199.34, (195.69, 202.99)
Max red meat 60g/day, egg	-0.97, (-6.15, 4.21)		199.28, (195.63, 202.93)
Max red meat 31g/day, egg	-1.22, (-6.4, 3.96)		199.03, (195.38, 202.68)
CCC 2030, non-smoked oily fish	-0.62, (-5.8, 4.56)		199.63, (195.97, 203.29)
CCC 2050, non-smoked oily fish	-0.6, (-5.78, 4.58)		199.64, (195.98, 203.3)
SDG, non-smoked oily fish	-0.73, (-5.91, 4.45)		199.51, (195.85, 203.17)
Max red meat 60g/day, non-smoked oily fish	-0.75, (-5.93, 4.43)		199.49, (195.83, 203.15)
Max red meat 31g/day, non-smoked oily fish	-0.84, (-6.02, 4.34)		199.41, (195.75, 203.07)
CCC 2030, plant-based meat alternatives	0.39, (-4.8, 5.58)		200.64, (196.98, 204.3)
CCC 2050, plant-based meat alternatives	1.17, (-4.02, 6.36)		201.42, (197.75, 205.09)
SDG, plant-based meat alternatives	0.08, (-5.12, 5.28)		200.33, (196.65, 204.01)
Max red meat 60g/day, plant-based meat alternatives	0.25, (-4.95, 5.45)		200.49, (196.81, 204.17)
Max red meat 31g/day, plant-based meat alternatives	0.94, (-4.26, 6.14)		201.19, (197.5, 204.88)
SDG, chicken	-0.93, (-6.11, 4.25)		199.31, (195.66, 202.96)
Max red meat 60g/day, chicken	-1.0, (-6.18, 4.18)		199.25, (195.6, 202.9)
Max red meat 31g/day, chicken	-1.28, (-6.46, 3.9)		198.97, (195.32, 202.62)

[truncated: 52 more sheets: Free Sugars, Sodium, Haem Iron, Non-haem Iron, Thiamin, Saturated fatty acids, Trans fatty acids, Cis monounsaturated fatty acids, n-6 fatty acids, n-3 fatty acids, Vitamin D, Vitamin A, Riboflavin, Potassium, Vitamin B6, Cholesterol, Magnesium, Phosphorus, Copper, Choloride …]
